# Supplementary material for: Ascorbic acid during the suckling period is required for proper DNA demethylation in the liver
Source: PubMed Central journal article supplement (PMC7718234; doi:10.1038/s41598-020-77962-7), 2020-12-04
Supplement: 41598_2020_77962_MOESM1_ESM.pdf [file 41598_2020_77962_MOESM1_ESM.pdf]

## **Supplementary information**

### **Ascorbic acid during the suckling period is required for proper DNA demethylation in the liver**

Kenichi Kawahori, Yoshitaka Kondo, Xunmei Yuan, Yuki Kawasaki, Nozomi Hanzawa, Kazutaka Tsujimoto, Fumiko Wada, Takashi Kohda, Akihito Ishigami, Tetsuya Yamada, Yoshihiro Ogawa and Koshi Hashimoto

#### **Address all correspondence to:**

Koshi Hashimoto, M.D., Ph.D.

Department of Diabetes, Endocrinology and Hematology,

Dokkyo Medical University Saitama Medical Center,

2-1-50 Minami-Koshigaya, Koshigaya, Saitama 343-8555, Japan

Tel/Fax: +81-48-965-1111/8253. E-mail: [k-hashimoto@dokkyomed.ac.jp](mailto:k-hashimoto@dokkyomed.ac.jp)

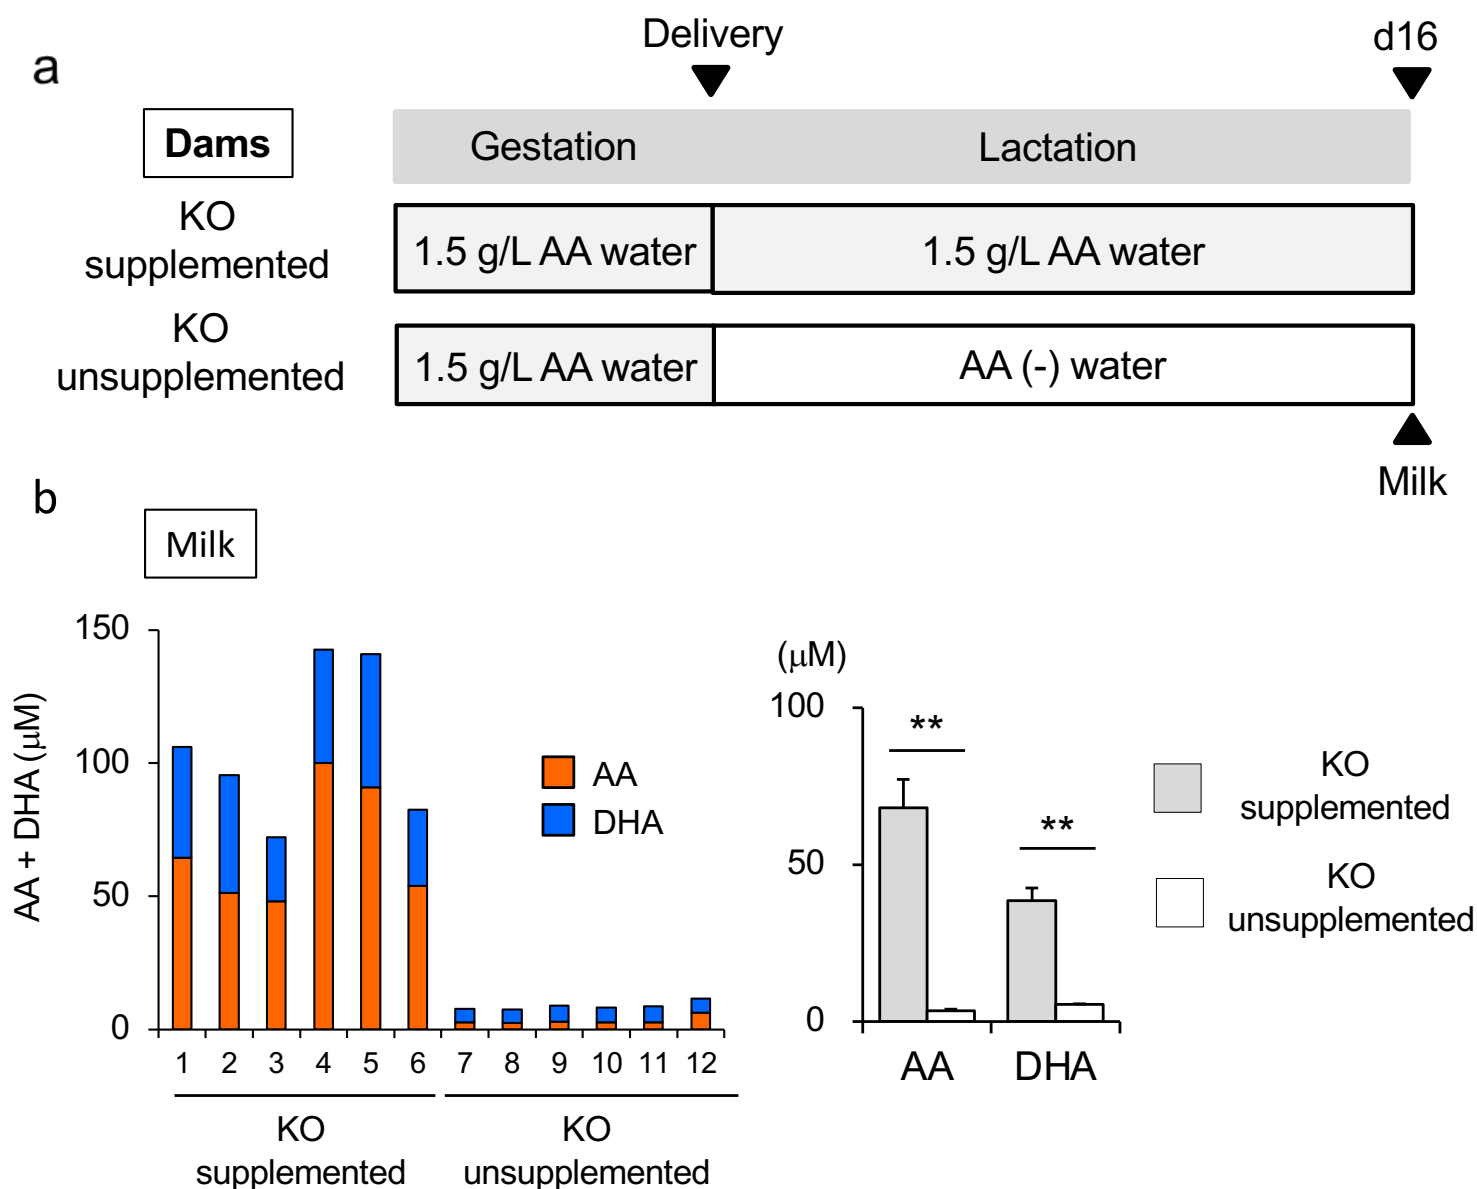

### Supplementary Figure 1

Administration of 1.5 g/L AA water to SMP30/GNL KO (KO) dams during the lactation period and AA levels in milk.

(a) Protocol of the preliminary experiment. (b) AA levels in the milk of each dam (left panel). Statistical analysis of AA and DHA levels in the milk of KO supplemented (n=6) and unsupplemented (n=6) dams (right panel).

Statistical analysis using an unpaired Student's *t*-test.

Data are expressed as the mean  $\pm$  SEM. \*\**P* < 0.01 vs. KO supplemented dams.

a

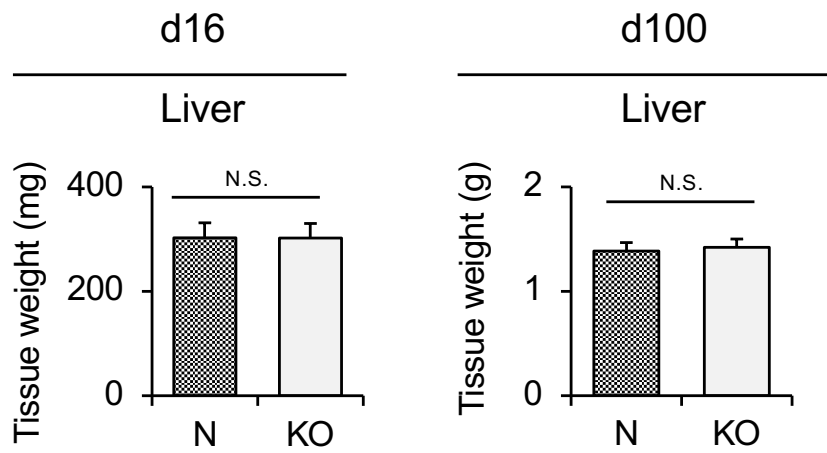

b

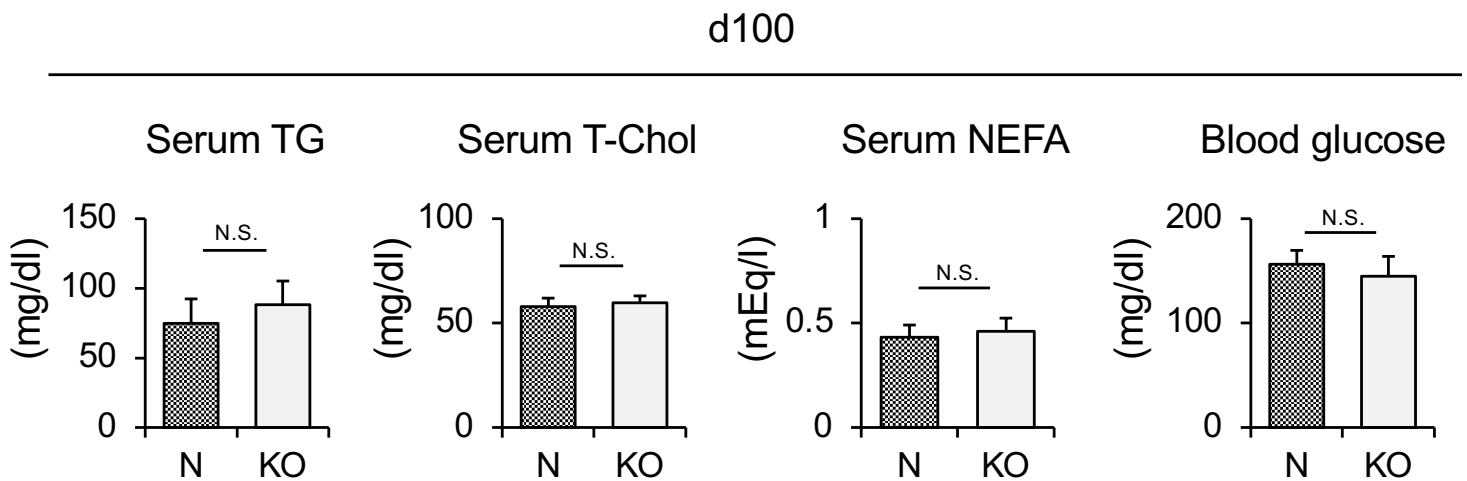

### Supplementary Figure 2

(a) Liver weights in KO and N offspring on d16 (left panel) and d100 (right panel) (n=6–8 per group).

(b) Serum TG, T-Chol, NEFA, and blood glucose concentrations on d100 (n=6–8 per group). Statistical analysis using an unpaired Student's *t*-test.

Data are expressed as the mean  $\pm$  SEM. N.S., not significant vs. N offspring.

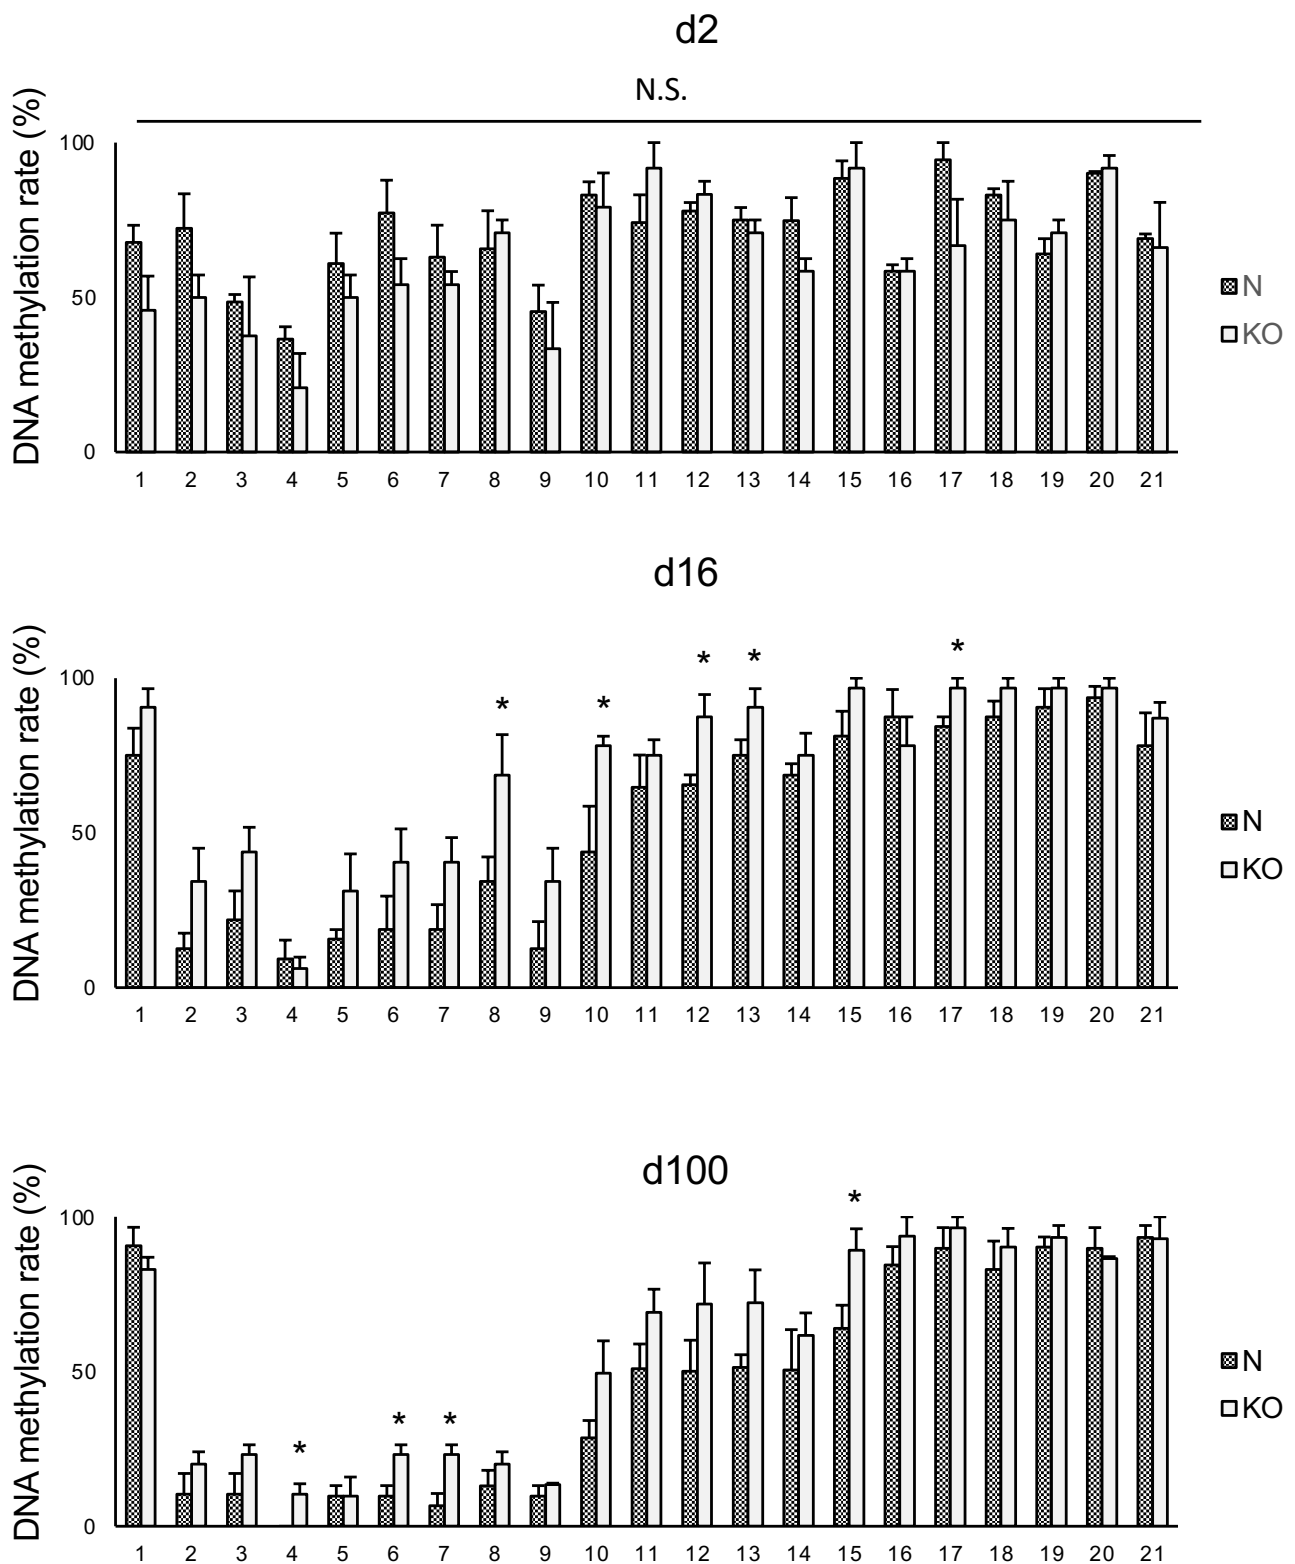

### Supplementary Figure 3

Statistical analysis of DNA methylation rates at each CpG site of *Fgf21*.

N (n=4), KO (n=3–4). Statistical analysis using an unpaired Student's *t*-test.

Data are expressed as the mean  $\pm$  SEM. \**P* < 0.05; N.S., not significant vs. N offspring.

**Supplementary Table 1a: N vs KO 361 hypomethylation genes on d16**

| Probe Name     | Gene Name             | Methylation difference value |
|----------------|-----------------------|------------------------------|
| A_68_P08214884 | Irak3-Tmbim4          | 0.125921                     |
| A_68_P04499666 | Camkk2                | 0.279317                     |
| A_68_P09233269 | Acadv1-Dlgh4          | 0.312319                     |
| A_68_P02014894 | Urm1                  | 0.344014                     |
| A_68_P08357114 | Trhde                 | 0.34902                      |
| A_68_P01716664 | Gja9                  | 0.391103                     |
| A_68_P02014879 | Urm1                  | 0.395382                     |
| A_68_P12145566 | C1ql4-2810451A06Rik   | 0.396091                     |
| A_68_P05957708 | Nkx6-2                | 0.399                        |
| A_68_P05872318 | Scnn1a                | 0.413974                     |
| A_68_P09560702 | Tbx21                 | 0.424432                     |
| A_68_P09449784 | Chad                  | 0.426009                     |
| A_68_P04844116 | Cxcl4                 | 0.461124                     |
| A_68_P06597280 | Gramd1a               | 0.477726                     |
| A_68_P02023970 | 1110061N23Rik         | 0.481116                     |
| A_68_P06221701 | Bag3                  | 0.481848                     |
| A_68_P00632313 | Mpz11                 | 0.485613                     |
| A_68_P10712044 | Ubqln1                | 0.496671                     |
| A_68_P10116466 | Jag2                  | 0.49781                      |
| A_68_P13434054 | B3galt4               | 0.500667                     |
| A_68_P13174876 | Dom3z                 | 0.500697                     |
| A_68_P14209556 | Rin1                  | 0.506115                     |
| A_68_P08991491 | 1110036O03Rik         | 0.508581                     |
| A_68_P14181866 | 2700081O15Rik         | 0.513096                     |
| A_68_P13305263 | Asah3-Clpp            | 0.514857                     |
| A_68_P13384331 | Tefeb                 | 0.51738                      |
| A_68_P13214276 | Gpsm3                 | 0.518699                     |
| A_68_P12120920 | Aqp5                  | 0.523591                     |
| A_68_P01560829 | 2810408M09Rik-Slc2a10 | 0.524824                     |
| A_68_P12864479 | Popdc2                | 0.539121                     |
| A_68_P09437569 | Zrsr1                 | 0.540649                     |
| A_68_P06352181 | BC053749-Hspb6        | 0.541929                     |
| A_68_P06117321 | Rshl1                 | 0.542194                     |

|                |                     |          |
|----------------|---------------------|----------|
| A_68_P02203170 | Elf5                | 0.546067 |
| A_68_P09528972 | Zfp454              | 0.546671 |
| A_68_P13174873 | Dom3z               | 0.548361 |
| A_68_P09473033 | Slc6a4              | 0.551388 |
| A_68_P01390546 | Tcfap2c             | 0.554509 |
| A_68_P14274310 | Xpnpep1             | 0.555075 |
| A_68_P14305323 | Gng3                | 0.560524 |
| A_68_P00750173 | Pde6d               | 0.568877 |
| A_68_P14495356 | I830134H01Rik-Cep55 | 0.572836 |
| A_68_P07820591 | Pcbp4               | 0.572952 |
| A_68_P09547539 | BC017647            | 0.575527 |
| A_68_P03534967 | Zfp593              | 0.581867 |
| A_68_P07329396 | Gm587               | 0.583631 |
| A_68_P02602374 | Gm128               | 0.584557 |
| A_68_P07651775 | Cspg5               | 0.584654 |
| A_68_P06887581 | Hsf4                | 0.587977 |
| A_68_P09110706 | Vamp2               | 0.588126 |
| A_68_P04453213 | Gpr81               | 0.588632 |
| A_68_P01674549 | 2610528K11Rik       | 0.588811 |
| A_68_P08214273 | Dapk3               | 0.592258 |
| A_68_P09153352 | Rnf185              | 0.595229 |
| A_68_P01674542 | 2610528K11Rik       | 0.597532 |
| A_68_P12098583 | Prph1               | 0.598549 |
| A_68_P13920652 | Npc1                | 0.598715 |
| A_68_P13266254 | Thbs2               | 0.602386 |
| A_68_P13927242 | Pcdhac2             | 0.602414 |
| A_68_P01316736 | Sh2d3c              | 0.604611 |
| A_68_P13965496 | Pstpip2             | 0.605318 |
| A_68_P01519278 | 1700037H04Rik       | 0.605721 |
| A_68_P05872300 | Scnn1a              | 0.606359 |
| A_68_P09547535 | BC017647            | 0.606866 |
| A_68_P07240689 | Jund1               | 0.608162 |
| A_68_P07864839 | Gup1                | 0.608188 |
| A_68_P01851539 | Fkhl18              | 0.613074 |
| A_68_P08829070 | Galnt4              | 0.613235 |

|                |               |          |
|----------------|---------------|----------|
| A_68_P11632181 | Jph4          | 0.616921 |
| A_68_P09548393 | Aoc3          | 0.622859 |
| A_68_P03733795 | Tcfap2e       | 0.623707 |
| A_68_P14628736 | 6430550H21Rik | 0.62502  |
| A_68_P12465449 | Kdelr3        | 0.62509  |
| A_68_P12047179 | Sh3bp1        | 0.625272 |
| A_68_P00789035 | Ankrd39       | 0.625876 |
| A_68_P05240711 | Rarres2       | 0.62619  |
| A_68_P09099286 | A830053O21Rik | 0.627881 |
| A_68_P00364377 | Zfp451        | 0.627981 |
| A_68_P08564779 | Rps15         | 0.628822 |
| A_68_P11217197 | Ltb4r2        | 0.629809 |
| A_68_P02681348 | BC107364      | 0.632958 |
| A_68_P00906158 | Cxcr7         | 0.63305  |
| A_68_P12543635 | Mcm4-Prkdc    | 0.634384 |
| A_68_P02898238 | Cyr61         | 0.634977 |
| A_68_P08002166 | 1700104A03Rik | 0.635226 |
| A_68_P04137921 | Alox5ap       | 0.635499 |
| A_68_P03957585 | Necap2        | 0.636179 |
| A_68_P04345682 | 2410025L10Rik | 0.63642  |
| A_68_P05030572 | Cd27          | 0.639387 |
| A_68_P04699015 | Zp3           | 0.640996 |
| A_68_P02267970 | Chn1          | 0.642925 |
| A_68_P09017457 | 2310040C09Rik | 0.644335 |
| A_68_P03751620 | Zc3h12a       | 0.647902 |
| A_68_P07374455 | Rpl13         | 0.648297 |
| A_68_P07140842 | Pik3r2        | 0.649261 |
| A_68_P05138684 | Cand2         | 0.649927 |
| A_68_P14545948 | Ubqln2        | 0.650703 |
| A_68_P08435891 | Edg6          | 0.650775 |
| A_68_P14235870 | Scyl1         | 0.650869 |
| A_68_P03743542 | Zswim5        | 0.651373 |
| A_68_P01851550 | Fkhl18        | 0.652145 |
| A_68_P06938838 | Egln1         | 0.652247 |
| A_68_P06053429 | Tssc4         | 0.652901 |

|                |                |          |
|----------------|----------------|----------|
| A_68_P01239005 | Cd40           | 0.653058 |
| A_68_P09240367 | Tbkbp1         | 0.653762 |
| A_68_P14229760 | Npas4          | 0.654225 |
| A_68_P04112279 | Gpr30          | 0.65575  |
| A_68_P13355809 | Grm4           | 0.656133 |
| A_68_P09433957 | 0610009B22Rik  | 0.656763 |
| A_68_P11912864 | Krt8           | 0.656893 |
| A_68_P12773755 | EG328644       | 0.656902 |
| A_68_P09042391 | P2rx1          | 0.657686 |
| A_68_P06596029 | Ppp5c          | 0.657997 |
| A_68_P09613199 | Coro6          | 0.660504 |
| A_68_P11423240 | E130112L23Rik  | 0.661076 |
| A_68_P05416737 | Cxcl12         | 0.661122 |
| A_68_P06900371 | Ogfod1         | 0.662146 |
| A_68_P06409764 | Atp2a1         | 0.663605 |
| A_68_P04092027 | Dnajb5         | 0.664341 |
| A_68_P01102474 | Sox13          | 0.6644   |
| A_68_P14311105 | Kcnip2         | 0.666394 |
| A_68_P13594483 | Csnk1g3        | 0.667548 |
| A_68_P00776589 | Zfp142-Bcs1l   | 0.667806 |
| A_68_P13056021 | Tnf            | 0.667863 |
| A_68_P00275693 | Gpbar1         | 0.670061 |
| A_68_P08025256 | Pdzd3          | 0.670416 |
| A_68_P13484729 | Tbcd24         | 0.671049 |
| A_68_P04999281 | 5730596B20Rik  | 0.67269  |
| A_68_P10747285 | 1110007C09Rik  | 0.672715 |
| A_68_P12151832 | Wnt10b         | 0.672795 |
| A_68_P10640236 | Nid1           | 0.673032 |
| A_68_P04868247 | Coro1c         | 0.673163 |
| A_68_P09978294 | Papln          | 0.673603 |
| A_68_P13385328 | 4930546H06Rik  | 0.673863 |
| A_68_P14704391 | Cited1         | 0.674611 |
| A_68_P05933947 | Mical2         | 0.674843 |
| A_68_P11875450 | A_68_P11875450 | 0.677288 |
| A_68_P01028979 | Ptpn7          | 0.677652 |



|                |               |          |
|----------------|---------------|----------|
| A_68_P00740579 | Fzd5          | 0.677704 |
| A_68_P00273226 | EG240916      | 0.677783 |
| A_68_P09652627 | BC029169      | 0.677939 |
| A_68_P09906321 | A830093I24Rik | 0.678157 |
| A_68_P06652023 | Mrvi1         | 0.679824 |
| A_68_P01873041 | Eng           | 0.680099 |
| A_68_P12831564 | Ets2          | 0.680777 |
| A_68_P09596001 | Patz1         | 0.681082 |
| A_68_P04617651 | Ncor2         | 0.681624 |
| A_68_P08675960 | Palm          | 0.683342 |
| A_68_P05438068 | Kcna1         | 0.684301 |
| A_68_P05734641 | Gata2         | 0.68551  |
| A_68_P10908480 | Dcdc2a        | 0.685771 |
| A_68_P09449773 | Chad          | 0.685848 |
| A_68_P08669395 | Moxd1         | 0.686129 |
| A_68_P04460565 | Sh2b3         | 0.686167 |
| A_68_P06930178 | B3gnt3        | 0.68797  |
| A_68_P08763291 | Hmg20b        | 0.688355 |
| A_68_P06578180 | D930014E17Rik | 0.689157 |
| A_68_P03709353 | Plcl4         | 0.690147 |
| A_68_P14292422 | Hps6          | 0.690356 |
| A_68_P08782489 | Rkhd1         | 0.691004 |
| A_68_P04148014 | Polr2b        | 0.691478 |
| A_68_P12241657 | Plec1         | 0.691555 |
| A_68_P06660845 | Arntl         | 0.692637 |
| A_68_P04460565 | Sh2b3         | 0.692791 |
| A_68_P02631941 | Nexn          | 0.693323 |
| A_68_P10014745 | Pnma1         | 0.693359 |
| A_68_P09572006 | 4933439F11Rik | 0.69461  |
| A_68_P13119784 | Plg           | 0.694679 |
| A_68_P12092853 | Ppp1r1a       | 0.695136 |
| A_68_P04453398 | Ints1         | 0.695922 |
| A_68_P15196933 | Tex13         | 0.696127 |
| A_68_P13166506 | Ddah2         | 0.696202 |
| A_68_P03487385 | Clenka        | 0.696207 |

|                |               |          |
|----------------|---------------|----------|
| A_68_P09166146 | Tmc8          | 0.696329 |
| A_68_P11494144 | Nudt18        | 0.696618 |
| A_68_P05548217 | Chd4          | 0.696779 |
| A_68_P07855774 | Hmgn3         | 0.69731  |
| A_68_P10975508 | Gmn           | 0.697722 |
| A_68_P05303155 | Plxna1        | 0.69801  |
| A_68_P01110961 | Nek2          | 0.698011 |
| A_68_P03011094 | Tmem79        | 0.698861 |
| A_68_P02220259 | 9130404D14Rik | 0.699233 |
| A_68_P10747279 | 1110007C09Rik | 0.699403 |
| A_68_P03496087 | Rcc1          | 0.700272 |
| A_68_P10018570 | Ap4s1         | 0.700294 |
| A_68_P08708090 | Aire          | 0.700375 |
| A_68_P08376634 | Lrrc3         | 0.700464 |
| A_68_P04028116 | Cldn19        | 0.700611 |
| A_68_P04422939 | Ssh1-Daol     | 0.700904 |
| A_68_P00443803 | Ptma          | 0.701754 |
| A_68_P10508113 | Tbc1d7        | 0.701874 |
| A_68_P04934457 | Ttc28         | 0.702231 |
| A_68_P03602288 | Cdca8         | 0.702874 |
| A_68_P05896796 | Mogat2        | 0.702971 |
| A_68_P10714293 | Wdr37         | 0.703125 |
| A_68_P12215401 | Sstr3         | 0.703892 |
| A_68_P03361653 | Clta          | 0.703919 |
| A_68_P04371627 | Acacb         | 0.704858 |
| A_68_P10096903 | Bdkrb1        | 0.705774 |
| A_68_P04617651 | Ncor2         | 0.706079 |
| A_68_P04148014 | Polr2b        | 0.706351 |
| A_68_P07903837 | Rgl3          | 0.706554 |
| A_68_P04934457 | Ttc28         | 0.708233 |
| A_68_P04868247 | Coro1c        | 0.708323 |
| A_68_P12916411 | Aifm3         | 0.708763 |
| A_68_P13684816 | Pcdha12       | 0.709138 |
| A_68_P10330008 | Sostdc1       | 0.709319 |
| A_68_P04028278 | 2410166I05Rik | 0.709542 |

|                |                    |          |
|----------------|--------------------|----------|
| A_68_P06111935 | 5830482F20Rik      | 0.710844 |
| A_68_P13166533 | Ddah2              | 0.711201 |
| A_68_P04893781 | Snx8               | 0.711642 |
| A_68_P06522471 | Rhog               | 0.711889 |
| A_68_P10103614 | Tnfaip2            | 0.712084 |
| A_68_P06614033 | B3gnt8             | 0.712098 |
| A_68_P08513877 | Pcnt-2610028H24Rik | 0.712241 |
| A_68_P12363258 | Gdnf               | 0.712776 |
| A_68_P01977788 | Mybl2              | 0.713067 |
| A_68_P09593299 | OTTMUSG00000000934 | 0.713303 |
| A_68_P09525413 | Hes7               | 0.71332  |
| A_68_P04321318 | Sparcl1            | 0.713426 |
| A_68_P11375105 | Ap1g2              | 0.713831 |
| A_68_P12689036 | St6gal1            | 0.715021 |
| A_68_P05934099 | Eef2k              | 0.715064 |
| A_68_P04519541 | Gfi1               | 0.715563 |
| A_68_P09214455 | Kctd11             | 0.715811 |
| A_68_P13439828 | Ptprs              | 0.716297 |
| A_68_P12784817 | St3gal6            | 0.716503 |
| A_68_P11718247 | Tspan14            | 0.717309 |
| A_68_P04877727 | Bmp3               | 0.717431 |
| A_68_P03792648 | Yrdc               | 0.717437 |
| A_68_P02884425 | D3Erd300e          | 0.717454 |
| A_68_P05234904 | Vps24              | 0.717545 |
| A_68_P06124278 | Myo7a              | 0.717896 |
| A_68_P01296051 | Slc34a3            | 0.717958 |
| A_68_P06256619 | Lgals7             | 0.718671 |
| A_68_P12215542 | Parvb              | 0.719236 |
| A_68_P08513992 | Cdk4               | 0.72038  |
| A_68_P07957476 | Naalad2            | 0.720388 |
| A_68_P06584744 | Leng9              | 0.720687 |
| A_68_P09491191 | D130058I21Rik      | 0.720861 |
| A_68_P04488676 | Slc26a1            | 0.721268 |
| A_68_P01253610 | Hoxd1              | 0.721289 |
| A_68_P14209573 | Rin1               | 0.72165  |

|                |                |          |
|----------------|----------------|----------|
| A_68_P09425733 | 2610019A05Rik  | 0.722488 |
| A_68_P02099291 | Mastl-Yme11l   | 0.72253  |
| A_68_P09292536 | Gria1          | 0.723134 |
| A_68_P14280936 | Plcb3          | 0.723248 |
| A_68_P08636022 | Myl6           | 0.723833 |
| A_68_P01680617 | Gyltl1b-Pex16  | 0.724056 |
| A_68_P04422939 | Ssh1-Dao1      | 0.72428  |
| A_68_P04047546 | Icmt           | 0.724809 |
| A_68_P01573803 | Srxn1          | 0.725053 |
| A_68_P11165637 | Fut11          | 0.72549  |
| A_68_P05636961 | Fkbp14-Plekha8 | 0.725849 |
| A_68_P13201109 | Jmjd2b         | 0.72621  |
| A_68_P13355818 | Grm4           | 0.727152 |
| A_68_P12341775 | Plec1          | 0.727287 |
| A_68_P10857126 | Cdc14b         | 0.727792 |
| A_68_P05934093 | Eef2k          | 0.728659 |
| A_68_P02083343 | 2310003F16Rik  | 0.728743 |
| A_68_P00496856 | Ankrd23        | 0.728936 |
| A_68_P01923886 | Mc3r           | 0.729017 |
| A_68_P03751620 | Zc3h12a        | 0.729428 |
| A_68_P07246627 | Rfx1           | 0.729883 |
| A_68_P09356521 | Enpp7          | 0.729887 |
| A_68_P03496087 | Rcc1           | 0.729996 |
| A_68_P06928238 | Spire2         | 0.73006  |
| A_68_P05908753 | Cd81           | 0.730184 |
| A_68_P00363449 | Teddm1         | 0.730516 |
| A_68_P07887111 | Dock6          | 0.730736 |
| A_68_P07287900 | Gpr56          | 0.730926 |
| A_68_P03255820 | Extl1          | 0.73101  |
| A_68_P07950323 | Sh3px3         | 0.731444 |
| A_68_P05389639 | Ldhb           | 0.731474 |
| A_68_P11613508 | Kctd12         | 0.73185  |
| A_68_P10446717 | Irx4           | 0.73249  |
| A_68_P09161409 | Scrn2          | 0.732636 |
| A_68_P13241937 | Nfkbie         | 0.732862 |

|                |               |          |
|----------------|---------------|----------|
| A_68_P09104652 | Aatk          | 0.733589 |
| A_68_P14131501 | Lox           | 0.734047 |
| A_68_P03973054 | Dvl1          | 0.734255 |
| A_68_P06599172 | Grin2d-Kdelr1 | 0.734478 |
| A_68_P13127089 | Csnk2b-Bat4   | 0.735142 |
| A_68_P04698270 | Fndc4         | 0.735177 |
| A_68_P03867484 | Clstn1        | 0.735425 |
| A_68_P04218037 | Tbx3          | 0.735503 |
| A_68_P04812922 | Ugdh          | 0.735848 |
| A_68_P04337962 | Rnf4          | 0.736145 |
| A_68_P07180083 | Rnfl66        | 0.73641  |
| A_68_P07321844 | Ank1          | 0.736415 |
| A_68_P08527799 | Psap          | 0.73649  |
| A_68_P05548225 | Chd4          | 0.736814 |
| A_68_P07600936 | Gnai2         | 0.73698  |
| A_68_P10363078 | Six6          | 0.737019 |
| A_68_P11507604 | Pcdh17        | 0.73739  |
| A_68_P03792648 | Yrdc          | 0.737405 |
| A_68_P14154937 | Ankrd2        | 0.737757 |
| A_68_P10602136 | Btn2a2        | 0.737769 |
| A_68_P06444721 | Snrpa         | 0.737845 |
| A_68_P03606907 | Cd72          | 0.737901 |
| A_68_P03457489 | Ppcs-Zmynd12  | 0.738639 |
| A_68_P14814534 | Gpm6b         | 0.738689 |
| A_68_P07185461 | Wfdc1         | 0.738804 |
| A_68_P08275638 | Rfx4          | 0.739075 |
| A_68_P00160667 | Dpt           | 0.739301 |
| A_68_P00606676 | Gpa33         | 0.739334 |
| A_68_P05691152 | Chn2          | 0.739362 |
| A_68_P06833358 | Gpr56         | 0.739499 |
| A_68_P09941671 | Sstr1         | 0.74007  |
| A_68_P04070267 | Dhcr24        | 0.740619 |
| A_68_P06666492 | C030039L03Rik | 0.740669 |
| A_68_P04751477 | 1110006O24Rik | 0.741191 |
| A_68_P05331102 | Gng11         | 0.741293 |

|                |                             |          |
|----------------|-----------------------------|----------|
| A_68_P05957743 | Nkx6-2                      | 0.741499 |
| A_68_P04240365 | Crmp1                       | 0.741724 |
| A_68_P10379467 | Slc25a21                    | 0.741849 |
| A_68_P12199134 | 4930572J05Rik               | 0.742044 |
| A_68_P13948787 | Arhgap12                    | 0.742451 |
| A_68_P06012484 | 2610207I05Rik-4930583K01Rik | 0.742491 |
| A_68_P13644965 | Tubb6                       | 0.743278 |
| A_68_P10198482 | Akt1                        | 0.743675 |
| A_68_P13205225 | Trim40-Trim31               | 0.743786 |
| A_68_P08513384 | Slc35d3                     | 0.743852 |
| A_68_P13450793 | Zbtb22                      | 0.744209 |
| A_68_P12526550 | A_68_P12526550              | 0.744331 |
| A_68_P01015609 | Cdc73                       | 0.744382 |
| A_68_P03439401 | Dmbx1                       | 0.744462 |
| A_68_P13140353 | Rhoq                        | 0.745189 |
| A_68_P00854962 | Phlda3                      | 0.745195 |
| A_68_P01075518 | Wnt6                        | 0.745267 |
| A_68_P14889744 | Mid1ip1                     | 0.745313 |
| A_68_P10337840 | Npas3                       | 0.745441 |
| A_68_P00072270 | Ptpn14                      | 0.74565  |
| A_68_P07291347 | Calb2                       | 0.746013 |
| A_68_P03797739 | Nrd1                        | 0.746187 |
| A_68_P09651106 | 2400006H24Rik               | 0.746323 |
| A_68_P12007011 | Exosc4                      | 0.746508 |
| A_68_P06935487 | Arhgef7                     | 0.746566 |
| A_68_P07422403 | Lyl1                        | 0.746612 |
| A_68_P06064392 | Foxa3                       | 0.74673  |
| A_68_P10491539 | Hist1h2ac-Hist1h2bc         | 0.747252 |
| A_68_P06554044 | Cd151                       | 0.74777  |
| A_68_P06026491 | St8sia2                     | 0.748199 |
| A_68_P14751401 | Usp11                       | 0.7483   |
| A_68_P00186067 | A830006F12Rik               | 0.748319 |
| A_68_P07309112 | Dnase2a                     | 0.748356 |
| A_68_P13748923 | Zadh2                       | 0.748589 |
| A_68_P02667260 | Pcdh10                      | 0.748733 |

|                |               |          |
|----------------|---------------|----------|
| A_68_P00722329 | Des           | 0.748981 |
| A_68_P12191245 | Dgat1         | 0.748994 |
| A_68_P12361670 | Zfp385        | 0.749539 |
| A_68_P03032928 | Hcn3          | 0.749552 |
| A_68_P08112408 | Slc44a2       | 0.749614 |
| A_68_P07512596 | Apeh          | 0.749822 |
| A_68_P01060395 | Jph1          | 0.749868 |
| A_68_P02254675 | Trp53bp1      | 0.750289 |
| A_68_P00957880 | Eif5b         | 0.750973 |
| A_68_P14299016 | 2900009I07Rik | 0.751093 |
| A_68_P02560176 | Efna1         | 0.751514 |
| A_68_P09134740 | Colla1        | 0.7517   |
| A_68_P10174581 | Gsc           | 0.751757 |

**Supplementary Table 1b: N vs KO 2076 hypermethylation genes on d16**

| Probe Name     | Gene Name                  | Methylation difference value |
|----------------|----------------------------|------------------------------|
| A_68_P07868328 | BC021608                   | 149.5089                     |
| A_68_P12887690 | Prodh                      | 56.51778                     |
| A_68_P00618538 | Etnk2                      | 41.47804                     |
| A_68_P12362697 | Gpt1                       | 37.37363                     |
| A_68_P00900301 | Pcmt1                      | 35.40694                     |
| A_68_P12329747 | Arid2                      | 35.40673                     |
| A_68_P14169988 | Abcc2                      | 25.8389                      |
| A_68_P05887814 | Echs1                      | 21.04673                     |
| A_68_P08321362 | Apon                       | 20.82213                     |
| A_68_P05307915 | Adipor2                    | 19.10023                     |
| A_68_P02464513 | Ccrn4l                     | 17.55715                     |
| A_68_P05678107 | Inmt                       | 16.7483                      |
| A_68_P08974352 | ENSMUST00000100735.1:-5885 | 16.20611                     |
| A_68_P09537504 | Afmid                      | 15.9442                      |
| A_68_P08563152 | Ela2                       | 15.63068                     |
| A_68_P05519173 | Mkln1                      | 15.6077                      |
| A_68_P03900413 | Klhdc7a                    | 13.73074                     |
| A_68_P13594309 | Lipg                       | 12.32939                     |
| A_68_P13318294 | Ntn2l                      | 12.10038                     |
| A_68_P07593875 | Slc38a3                    | 11.27771                     |
| A_68_P06842129 | Miflip                     | 10.56861                     |
| A_68_P05908415 | 2700050L05Rik              | 10.22173                     |
| A_68_P09723695 | BC018371                   | 10.10064                     |
| A_68_P05943561 | Slc27a5                    | 9.543653                     |
| A_68_P08066253 | Slc38a3                    | 9.35168                      |
| A_68_P07593867 | Slc38a3                    | 9.316429                     |
| A_68_P08691684 | Atg5                       | 9.177752                     |
| A_68_P08005788 | Odf3l1                     | 8.806411                     |
| A_68_P11542106 | Itih1                      | 8.359333                     |
| A_68_P04599720 | Cxcl11                     | 8.030745                     |
| A_68_P03805415 | Ambp                       | 7.904292                     |
| A_68_P04899477 | Brap                       | 7.728543                     |
| A_68_P07946875 | Mst1                       | 7.503386                     |



|                |                |          |
|----------------|----------------|----------|
| A_68_P03581859 | St3gal3        | 7.389434 |
| A_68_P09529779 | Smarcd2-Tcam1  | 7.286503 |
| A_68_P09726405 | Ace            | 7.273568 |
| A_68_P03733137 | Rnfl86         | 7.273549 |
| A_68_P11040896 | Peci           | 7.174847 |
| A_68_P03430349 | 2010305A19Rik  | 6.971917 |
| A_68_P12362731 | Mfsd3          | 6.899038 |
| A_68_P06878871 | Mtus1          | 6.818042 |
| A_68_P12673756 | Nr1i2          | 6.745857 |
| A_68_P13360070 | A_68_P13360070 | 6.741152 |
| A_68_P06895632 | Ces1           | 6.672445 |
| A_68_P04281361 | Hpd            | 6.622698 |
| A_68_P06842128 | Mlflip         | 6.576161 |
| A_68_P13374816 | Zbtb12         | 6.548569 |
| A_68_P04983814 | Abcb9          | 6.515812 |
| A_68_P04376201 | Micall2        | 6.515287 |
| A_68_P07599181 | 6230410P16Rik  | 6.39384  |
| A_68_P04281361 | Hpd            | 6.213813 |
| A_68_P00901045 | 4632411B12Rik  | 6.157244 |
| A_68_P08439511 | Ftcd           | 6.083482 |
| A_68_P09529795 | Smarcd2        | 5.906523 |
| A_68_P01293034 | 4833422F24Rik  | 5.881187 |
| A_68_P13499424 | Slc29a1        | 5.799522 |
| A_68_P05979604 | Lsr            | 5.644396 |
| A_68_P06410148 | Zfp710         | 5.633832 |
| A_68_P01163299 | 0610012H03Rik  | 5.543465 |
| A_68_P13319154 | 9530058B02Rik  | 5.511274 |
| A_68_P13318311 | Ntn2l          | 5.48332  |
| A_68_P14259005 | AI450540       | 5.479673 |
| A_68_P01219086 | Pck1           | 5.389813 |
| A_68_P09575212 | Rsad1          | 5.372731 |
| A_68_P05975621 | Thrsp          | 5.360202 |
| A_68_P12670694 | Lpp            | 5.226043 |
| A_68_P03900427 | Klhdc7a        | 5.217989 |
| A_68_P09152032 | Rnfl35         | 5.197919 |

|                |                            |          |
|----------------|----------------------------|----------|
| A_68_P09016285 | Myo18a                     | 5.172534 |
| A_68_P07501017 | Apoa5                      | 5.107357 |
| A_68_P14652218 | ENSMUST00000037596.5:-3006 | 5.10705  |
| A_68_P13695623 | Ablim3                     | 5.100664 |
| A_68_P04599730 | Cxcl11                     | 4.951345 |
| A_68_P06293260 | Mir16                      | 4.879288 |
| A_68_P11718847 | 2200001I15Rik              | 4.835499 |
| A_68_P08595238 | 2310011J03Rik              | 4.822747 |
| A_68_P10766271 | Slc12a7                    | 4.79233  |
| A_68_P08992028 | Pnpo                       | 4.763937 |
| A_68_P03900439 | Klhdc7a                    | 4.763754 |
| A_68_P11762025 | Rnase13                    | 4.641695 |
| A_68_P04543843 | Bri3                       | 4.621074 |
| A_68_P05640859 | Fabp1                      | 4.613207 |
| A_68_P01293529 | A530013C23Rik              | 4.598874 |
| A_68_P07622451 | Apoc3                      | 4.578159 |
| A_68_P12051107 | Naprt1                     | 4.569646 |
| A_68_P06048161 | Pak4                       | 4.564847 |
| A_68_P08364613 | Gstt3                      | 4.540542 |
| A_68_P05811578 | Akr1d1                     | 4.526943 |
| A_68_P11089043 | Hmgcr                      | 4.516345 |
| A_68_P14367604 | Chka                       | 4.444416 |
| A_68_P09582270 | 2010305C02Rik              | 4.435232 |
| A_68_P02145945 | Clp1                       | 4.322997 |
| A_68_P03375546 | Slc25a34                   | 4.182237 |
| A_68_P04546813 | Slc2a9                     | 4.170806 |
| A_68_P03059976 | Ptgfr                      | 4.147474 |
| A_68_P02110645 | Ccbl1                      | 4.135499 |
| A_68_P04081654 | Dio1                       | 4.128077 |
| A_68_P07444192 | Indol1                     | 4.120093 |
| A_68_P13396158 | Dusp1                      | 4.086357 |
| A_68_P12208598 | 2810451A06Rik              | 4.079221 |
| A_68_P06312658 | Tmem147                    | 4.075241 |
| A_68_P01920530 | Uap1l1                     | 4.0708   |
| A_68_P06459191 | Saa4                       | 4.066211 |

|                |                            |          |
|----------------|----------------------------|----------|
| A_68_P07697198 | Acaa1a                     | 4.063827 |
| A_68_P11936126 | Josd1-Gtpbp1               | 4.005444 |
| A_68_P11406546 | Ang1                       | 3.963736 |
| A_68_P14030415 | Etf1                       | 3.946627 |
| A_68_P05885085 | Gfpt1                      | 3.93886  |
| A_68_P03625246 | Zswim5                     | 3.927893 |
| A_68_P13070859 | S3-12                      | 3.850016 |
| A_68_P13879820 | Slc23a1                    | 3.830024 |
| A_68_P09628447 | Arfl4                      | 3.822164 |
| A_68_P08173092 | Cyp8b1                     | 3.787066 |
| A_68_P05932565 | Polr2i                     | 3.785788 |
| A_68_P06096064 | Adam12                     | 3.772641 |
| A_68_P07894607 | E330026B02Rik              | 3.770963 |
| A_68_P08433161 | Gstt3                      | 3.76907  |
| A_68_P00846988 | Wdr42a                     | 3.759741 |
| A_68_P04755481 | Ociad2                     | 3.757315 |
| A_68_P12046833 | ENSMUST00000083630.1:-3976 | 3.727492 |
| A_68_P14275989 | Tbc1d12                    | 3.71587  |
| A_68_P05596978 | Rnf103                     | 3.715107 |
| A_68_P09620642 | Dcxr                       | 3.673635 |
| A_68_P10554343 | Pik3r1                     | 3.667529 |
| A_68_P10766266 | Slc12a7                    | 3.664243 |
| A_68_P04101457 | Gsh2                       | 3.648931 |
| A_68_P13322670 | Prr3                       | 3.621062 |
| A_68_P14019783 | Zfp532                     | 3.619501 |
| A_68_P10027436 | Rgs6                       | 3.611875 |
| A_68_P09620647 | Dcxr                       | 3.609131 |
| A_68_P10035212 | Zfyve1                     | 3.608449 |
| A_68_P11558065 | Dhrs4                      | 3.572378 |
| A_68_P12411237 | Derl1                      | 3.562609 |
| A_68_P09289118 | Aldh3a2                    | 3.556626 |
| A_68_P06214832 | Aqp8                       | 3.552239 |
| A_68_P02421072 | Dnajb4-Fubp1               | 3.547501 |
| A_68_P06631626 | Wtip                       | 3.499663 |
| A_68_P01249319 | Sephs1                     | 3.480791 |

|                |                     |          |
|----------------|---------------------|----------|
| A_68_P13107839 | Abcg8               | 3.46978  |
| A_68_P08416674 | Pbld                | 3.462775 |
| A_68_P03439290 | 1110049F12Rik       | 3.449798 |
| A_68_P01717991 | Btbd14a             | 3.436893 |
| A_68_P00880269 | Zfand2b             | 3.410346 |
| A_68_P07920795 | Apoa4               | 3.408297 |
| A_68_P00121769 | Rpe                 | 3.390084 |
| A_68_P07210491 | F10                 | 3.378174 |
| A_68_P07897281 | Rdx                 | 3.362075 |
| A_68_P07889364 | Tex12               | 3.355204 |
| A_68_P06223065 | Sephs2              | 3.352343 |
| A_68_P13586042 | C3                  | 3.338934 |
| A_68_P01875370 | Kcnb1               | 3.32409  |
| A_68_P06926631 | A230052G05Rik       | 3.317019 |
| A_68_P08066246 | Slc38a3             | 3.308154 |
| A_68_P03526224 | Cda                 | 3.307556 |
| A_68_P06099969 | Cebpa               | 3.298459 |
| A_68_P08064720 | 6230410P16Rik       | 3.289929 |
| A_68_P09413265 | Adam11              | 3.281643 |
| A_68_P07384679 | Pabpn1              | 3.251871 |
| A_68_P05678119 | Inmt                | 3.241554 |
| A_68_P04277065 | Cxcl1               | 3.232483 |
| A_68_P03300156 | Anp32b              | 3.218152 |
| A_68_P01342780 | Ccbl1               | 3.191739 |
| A_68_P13013556 | Ppl                 | 3.188637 |
| A_68_P06983908 | 5033428A16Rik       | 3.184366 |
| A_68_P08717087 | Tcba1               | 3.162999 |
| A_68_P01619771 | Insm1               | 3.162789 |
| A_68_P00991622 | Capn8               | 3.147283 |
| A_68_P09483427 | Sfrs2-2600014M03Rik | 3.144074 |
| A_68_P05338523 | Cmas                | 3.141646 |
| A_68_P00961427 | Tada11              | 3.138739 |
| A_68_P14332767 | Ttc9c               | 3.115044 |
| A_68_P05996158 | Flt3l               | 3.111308 |
| A_68_P14836142 | Trex2               | 3.110182 |

|                |                            |          |
|----------------|----------------------------|----------|
| A_68_P14217831 | Klf9                       | 3.106999 |
| A_68_P09257037 | ENSMUST00000083595.1:-5713 | 3.098821 |
| A_68_P09804391 | Siva1                      | 3.083022 |
| A_68_P01293546 | A530013C23Rik              | 3.051482 |
| A_68_P06041220 | 0610012D14Rik              | 3.030374 |
| A_68_P04831083 | Fndc4-Gckr                 | 3.023787 |
| A_68_P09606302 | Ern1                       | 3.02252  |
| A_68_P03863568 | Il11ra1                    | 3.013612 |
| A_68_P12156053 | Tigd5                      | 3.005614 |
| A_68_P08449896 | Foxo3a                     | 2.996945 |
| A_68_P09503245 | BC018371                   | 2.995543 |
| A_68_P03733127 | Rnf186                     | 2.995411 |
| A_68_P12138338 | Hoxc13                     | 2.993144 |
| A_68_P02980842 | Pex2                       | 2.984359 |
| A_68_P13594311 | Lipg                       | 2.981591 |
| A_68_P08110716 | Acp5                       | 2.979295 |
| A_68_P12843197 | Ehhadh                     | 2.979046 |
| A_68_P13107615 | Ticam1                     | 2.974038 |
| A_68_P01585335 | NM_027230:-12014           | 2.964752 |
| A_68_P07561473 | 2310005P05Rik              | 2.959764 |
| A_68_P06473014 | Slc27a5                    | 2.956857 |
| A_68_P11399794 | Gjb2                       | 2.954948 |
| A_68_P05596974 | Rnf103                     | 2.947421 |
| A_68_P01776420 | Tcf15                      | 2.943853 |
| A_68_P03670798 | Masp2                      | 2.938985 |
| A_68_P10766257 | Slc12a7                    | 2.938504 |
| A_68_P07467134 | Slc38a3                    | 2.929505 |
| A_68_P06023375 | Insc                       | 2.920786 |
| A_68_P09210759 | Ccdc49                     | 2.912065 |
| A_68_P01440416 | Fbxw2                      | 2.910985 |
| A_68_P05640423 | Ldhb                       | 2.910001 |
| A_68_P03300156 | Anp32b                     | 2.903748 |
| A_68_P01361686 | Agpat2                     | 2.896085 |
| A_68_P06318305 | Igf1r                      | 2.89603  |
| A_68_P09383678 | Pdk2                       | 2.895932 |

|                |               |          |
|----------------|---------------|----------|
| A_68_P01139487 | Wnt6          | 2.894217 |
| A_68_P08183902 | Hyal1         | 2.88674  |
| A_68_P13152306 | Slc9a3r2      | 2.882054 |
| A_68_P04831083 | Fndc4-Gckr    | 2.881455 |
| A_68_P06328757 | B3gnt8        | 2.878127 |
| A_68_P06495435 | Anpep         | 2.867574 |
| A_68_P10662976 | Fgfr4         | 2.866971 |
| A_68_P13494922 | Spsb3         | 2.857541 |
| A_68_P06677187 | Agt           | 2.848927 |
| A_68_P01655861 | F730014I05Rik | 2.847079 |
| A_68_P13428964 | 1700001C19Rik | 2.840882 |
| A_68_P02134180 | Abl1          | 2.834028 |
| A_68_P01902701 | 2700007P21Rik | 2.830826 |
| A_68_P09480262 | BC018371      | 2.815238 |
| A_68_P07697209 | Acaa1a        | 2.814605 |
| A_68_P04661116 | Sema3c        | 2.812567 |
| A_68_P00641555 | Nr1i3         | 2.806854 |
| A_68_P07561489 | 2310005P05Rik | 2.782162 |
| A_68_P11169779 | Ndst2         | 2.764472 |
| A_68_P04323144 | Sult1d1       | 2.758509 |
| A_68_P09136314 | Baiap2        | 2.757393 |
| A_68_P08824256 | Traf3ip2      | 2.755806 |
| A_68_P03522568 | Nbl1          | 2.753369 |
| A_68_P04222183 | Smardc3       | 2.748406 |
| A_68_P09295953 | Pctp          | 2.747116 |
| A_68_P09214836 | Mpdu1         | 2.738918 |
| A_68_P04323144 | Sult1d1       | 2.738819 |
| A_68_P03250140 | Inpp5b        | 2.721431 |
| A_68_P01176002 | Clp1          | 2.71744  |
| A_68_P07734324 | Tusc2         | 2.710532 |
| A_68_P12240032 | Eppk1         | 2.706811 |
| A_68_P07772617 | Rab39         | 2.702879 |
| A_68_P04590703 | Stx1a         | 2.69696  |
| A_68_P06376689 | Npas1         | 2.691118 |
| A_68_P13228675 | Chd1          | 2.68884  |

|                |                |          |
|----------------|----------------|----------|
| A_68_P01309646 | Gzfl           | 2.685509 |
| A_68_P02564830 | Igsf3          | 2.676821 |
| A_68_P09148759 | Igtp           | 2.671107 |
| A_68_P01342773 | Ccbl1          | 2.670489 |
| A_68_P00418602 | Adora1         | 2.670161 |
| A_68_P10556434 | Rnf44-BC040758 | 2.662607 |
| A_68_P07124748 | Lypla3         | 2.661755 |
| A_68_P12476467 | Pigp           | 2.639006 |
| A_68_P04081647 | Dio1           | 2.635988 |
| A_68_P12635594 | Ehhadh         | 2.633028 |
| A_68_P13251244 | Cyp4f13        | 2.628512 |
| A_68_P02865901 | Mef2d          | 2.618358 |
| A_68_P05978278 | Chst8          | 2.614958 |
| A_68_P08437597 | Trhde          | 2.610955 |
| A_68_P05278653 | Capza2         | 2.607221 |
| A_68_P09559562 | Shmt1          | 2.605692 |
| A_68_P08223987 | Wdr18          | 2.590578 |
| A_68_P07306669 | Car5a-Banp     | 2.58095  |
| A_68_P13059000 | Hmga1          | 2.567957 |
| A_68_P02944888 | Prune          | 2.565067 |
| A_68_P08388906 | 1810043G02Rik  | 2.563427 |
| A_68_P02726221 | Dclre1b        | 2.560761 |
| A_68_P09729896 | Phb            | 2.560086 |
| A_68_P11932638 | Cacnb3         | 2.557921 |
| A_68_P09845387 | Ppp1r13b       | 2.557738 |
| A_68_P10702707 | Slc35d2        | 2.533268 |
| A_68_P05433825 | Gm839          | 2.533074 |
| A_68_P00714552 | Uap1           | 2.530881 |
| A_68_P12051103 | Naprt1         | 2.525914 |
| A_68_P05893671 | 6330512M04Rik  | 2.521061 |
| A_68_P04983819 | Abcb9          | 2.518814 |
| A_68_P07254767 | Elmod2         | 2.51774  |
| A_68_P08425563 | Lss            | 2.511958 |
| A_68_P08614767 | Rap1b          | 2.496942 |
| A_68_P10863296 | Lect2          | 2.496456 |

|                |                            |          |
|----------------|----------------------------|----------|
| A_68_P06873958 | Ranbp10                    | 2.496356 |
| A_68_P02093470 | U46068                     | 2.488964 |
| A_68_P09612757 | Pcyl2                      | 2.481565 |
| A_68_P01797463 | A530013C23Rik              | 2.481148 |
| A_68_P08173101 | Cyp8b1                     | 2.475308 |
| A_68_P13251243 | Cyp4f13                    | 2.475173 |
| A_68_P05466381 | Zc3hc1                     | 2.471338 |
| A_68_P05358495 | Rassf8                     | 2.470641 |
| A_68_P09500328 | Tspan10                    | 2.468053 |
| A_68_P03296780 | Klhl9                      | 2.464396 |
| A_68_P08624242 | Apba3                      | 2.463312 |
| A_68_P05439808 | Irak2                      | 2.457734 |
| A_68_P08376605 | Lrrc3                      | 2.455004 |
| A_68_P14081599 | 5730405I09Rik              | 2.449208 |
| A_68_P13093038 | 1600002H07Rik              | 2.446507 |
| A_68_P04114789 | Add1                       | 2.444557 |
| A_68_P11865033 | Lgals2                     | 2.443036 |
| A_68_P04107032 | 0610009O03Rik              | 2.441583 |
| A_68_P04403090 | Slc2a9                     | 2.440666 |
| A_68_P07946873 | Mst1                       | 2.440302 |
| A_68_P02060698 | 4933440H19Rik              | 2.437239 |
| A_68_P09398667 | 2210020M01Rik              | 2.434596 |
| A_68_P05945054 | Usf2                       | 2.434095 |
| A_68_P04390199 | Ung                        | 2.429486 |
| A_68_P08533341 | Nodal                      | 2.424166 |
| A_68_P03513611 | St3gal3                    | 2.422837 |
| A_68_P04069200 | Klf4                       | 2.422161 |
| A_68_P06624530 | Centd2                     | 2.420805 |
| A_68_P09252755 | ENSMUST00000100735.1:-6717 | 2.420324 |
| A_68_P01582438 | Surf2                      | 2.417966 |
| A_68_P02999674 | Slc10a5                    | 2.415681 |
| A_68_P03087438 | Pklr                       | 2.408139 |
| A_68_P06061704 | Myo7a                      | 2.407684 |
| A_68_P08415566 | Mettl7b                    | 2.405015 |
| A_68_P04107032 | 0610009O03Rik              | 2.402721 |



|                |                  |          |
|----------------|------------------|----------|
| A_68_P05972322 | Xylt1            | 2.401768 |
| A_68_P02025392 | Ntng2            | 2.399047 |
| A_68_P03632444 | 2810405K02Rik    | 2.398607 |
| A_68_P03359505 | Trim62           | 2.398127 |
| A_68_P12677554 | Mrap             | 2.392233 |
| A_68_P02764963 | Tbl1xr1          | 2.387782 |
| A_68_P09350828 | Smcr8            | 2.374491 |
| A_68_P13172382 | Rhot2            | 2.366167 |
| A_68_P10532742 | Auh              | 2.364403 |
| A_68_P06683149 | Gtl3             | 2.357396 |
| A_68_P10735929 | Hmger            | 2.35734  |
| A_68_P07142897 | Taf1c            | 2.354426 |
| A_68_P03496599 | Il22ra1          | 2.347343 |
| A_68_P11308601 | Tgm1             | 2.346194 |
| A_68_P06523791 | Zfp94            | 2.343766 |
| A_68_P02904357 | Kcna3            | 2.335647 |
| A_68_P02154342 | NM_027230:-12364 | 2.329461 |
| A_68_P01628111 | Dab2ip           | 2.328603 |
| A_68_P10573446 | Larp5            | 2.324369 |
| A_68_P08191110 | Ifrd2            | 2.323141 |
| A_68_P09697830 | Sec14l4          | 2.32306  |
| A_68_P00396257 | Hhat             | 2.321683 |
| A_68_P08064723 | 6230410P16Rik    | 2.320892 |
| A_68_P14421027 | Pdlim1           | 2.320329 |
| A_68_P04909167 | D5Wsu178e        | 2.319522 |
| A_68_P09195968 | Asgr1            | 2.312983 |
| A_68_P01772350 | Lcn12            | 2.312137 |
| A_68_P07306676 | Car5a            | 2.309876 |
| A_68_P09350836 | Smcr8            | 2.309123 |
| A_68_P07248138 | Kifc3            | 2.303954 |
| A_68_P02454024 | Mtmr11           | 2.296738 |
| A_68_P04909167 | D5Wsu178e        | 2.295616 |
| A_68_P01700350 | Set              | 2.294143 |
| A_68_P09739582 | Nfe2l1           | 2.292697 |
| A_68_P03359505 | Trim62           | 2.291905 |

|                |               |          |
|----------------|---------------|----------|
| A_68_P06372045 | C730027J19Rik | 2.291516 |
| A_68_P09082170 | Pitpna        | 2.287789 |
| A_68_P01943462 | Ctsz          | 2.281854 |
| A_68_P12672593 | Polr2h        | 2.276607 |
| A_68_P08834117 | Ddit4         | 2.268307 |
| A_68_P04318728 | Pebp1         | 2.267146 |
| A_68_P13546277 | Ptk7          | 2.260121 |
| A_68_P02116222 | Slco4a1       | 2.25961  |
| A_68_P13319163 | 9530058B02Rik | 2.248109 |
| A_68_P06653585 | Plekha4       | 2.243493 |
| A_68_P07309218 | Kifc3         | 2.242923 |
| A_68_P06804280 | Irf2          | 2.242819 |
| A_68_P04608378 | Rnf6-Cdk8     | 2.235086 |
| A_68_P12448089 | Csnk1e        | 2.230008 |
| A_68_P04899482 | Brap          | 2.227235 |
| A_68_P08628191 | Cdc34         | 2.223585 |
| A_68_P04764801 | Sh2b2         | 2.223334 |
| A_68_P15086158 | Bcor          | 2.222255 |
| A_68_P03401491 | Zdhhc18       | 2.222238 |
| A_68_P09410666 | Ankrd43       | 2.22061  |
| A_68_P10015672 | Cdc42bpb      | 2.215493 |
| A_68_P06388543 | Fgf21         | 2.214782 |
| A_68_P09975941 | Crip1         | 2.214291 |
| A_68_P04899482 | Brap          | 2.209027 |
| A_68_P13235156 | Ccnd3         | 2.208879 |
| A_68_P14357243 | Stx5a         | 2.200926 |
| A_68_P01628078 | Dab2ip        | 2.200786 |
| A_68_P01375793 | Serping1      | 2.200737 |
| A_68_P12877631 | Ahsg          | 2.198088 |
| A_68_P14420129 | Ldb1          | 2.197755 |
| A_68_P07884006 | Csk           | 2.188885 |
| A_68_P03078310 | Tnfaip8l2     | 2.18658  |
| A_68_P13425194 | Acat3         | 2.179741 |
| A_68_P11522706 | Clu           | 2.1793   |
| A_68_P00493944 | Hs6st1        | 2.178304 |

|                |                |          |
|----------------|----------------|----------|
| A_68_P01788371 | Dgkz           | 2.175455 |
| A_68_P07210532 | F10            | 2.171598 |
| A_68_P09009810 | Asgr1          | 2.169984 |
| A_68_P00458829 | Rab17          | 2.165423 |
| A_68_P03987047 | Arhgef19       | 2.164841 |
| A_68_P07306600 | Pde4c          | 2.164265 |
| A_68_P13155345 | A_68_P13155345 | 2.162256 |
| A_68_P04389279 | Fscn1          | 2.161226 |
| A_68_P15185453 | Tmem47         | 2.161007 |
| A_68_P05514834 | 4921507P07Rik  | 2.160907 |
| A_68_P06314101 | Myo7a          | 2.154651 |
| A_68_P08793639 | Mon2           | 2.149339 |
| A_68_P13292578 | Rnps1          | 2.145298 |
| A_68_P02025387 | Ntng2          | 2.141241 |
| A_68_P07614068 | Trex1          | 2.137033 |
| A_68_P09656833 | Agxt2l2        | 2.130865 |
| A_68_P12721918 | 1500031L02Rik  | 2.130426 |
| A_68_P03318061 | Rcc2           | 2.12795  |
| A_68_P05965663 | Slc7a10        | 2.127828 |
| A_68_P01367667 | Rbck1          | 2.125261 |
| A_68_P06020155 | Slc22a18       | 2.125127 |
| A_68_P06397866 | Ldha           | 2.125032 |
| A_68_P14742409 | Pdzx           | 2.124636 |
| A_68_P04003490 | Efhd2          | 2.122804 |
| A_68_P11351920 | Ube2e1         | 2.122718 |
| A_68_P11100986 | Inhba          | 2.119196 |
| A_68_P06017740 | Ppp2r2d        | 2.117704 |
| A_68_P06814843 | Ocell1         | 2.116272 |
| A_68_P06827522 | Pcoln3         | 2.113259 |
| A_68_P06928371 | Atp6v0d1       | 2.111896 |
| A_68_P05251168 | 8430408G22Rik  | 2.109618 |
| A_68_P05441762 | St8sia1        | 2.108445 |
| A_68_P06390438 | AI428936       | 2.108242 |
| A_68_P01293536 | A530013C23Rik  | 2.105704 |
| A_68_P06046623 | Ppp2r2d        | 2.105225 |

|                |               |          |
|----------------|---------------|----------|
| A_68_P09459558 | Tcf7          | 2.102402 |
| A_68_P06275539 | Saa3          | 2.097308 |
| A_68_P13425877 | Klc4          | 2.097008 |
| A_68_P13249138 | Tap2          | 2.093152 |
| A_68_P09709913 | Igfbp1        | 2.092937 |
| A_68_P01495917 | Spag4l-Bpil1  | 2.092138 |
| A_68_P10754219 | Peci          | 2.090161 |
| A_68_P12117966 | LOC554292     | 2.08931  |
| A_68_P10642062 | Lrrc16        | 2.088253 |
| A_68_P00208770 | Serpinb8      | 2.085657 |
| A_68_P08262151 | Mdm1          | 2.082818 |
| A_68_P06599541 | Armc5         | 2.082517 |
| A_68_P03730091 | Ube2j2        | 2.078767 |
| A_68_P09582284 | 2010305C02Rik | 2.078021 |
| A_68_P12362832 | Gpt1          | 2.077018 |
| A_68_P03197768 | Mtmr11        | 2.075908 |
| A_68_P08308992 | Tdg           | 2.074748 |
| A_68_P09013605 | Higd1b        | 2.073842 |
| A_68_P00634491 | Tmem58        | 2.073557 |
| A_68_P03682005 | Dscr1l2       | 2.069652 |
| A_68_P05591343 | Zyx           | 2.067755 |
| A_68_P06369053 | Zdhhc13       | 2.06556  |
| A_68_P00619218 | Nek2          | 2.060574 |
| A_68_P13711135 | E230022H04Rik | 2.059753 |
| A_68_P11658285 | Kcnk5         | 2.054507 |
| A_68_P06049341 | Egln2         | 2.054385 |
| A_68_P08692362 | Bloc1s1-Itga7 | 2.052585 |
| A_68_P13441074 | Pacsin1       | 2.051962 |
| A_68_P08454871 | Nodal         | 2.041094 |
| A_68_P13752126 | 2810439F02Rik | 2.040437 |
| A_68_P05495854 | Casd1         | 2.039907 |
| A_68_P08803717 | Hsd17b6       | 2.039646 |
| A_68_P06584985 | Ppfbp2        | 2.038819 |
| A_68_P02103490 | Notch1        | 2.032303 |
| A_68_P08446465 | Ncln          | 2.029448 |

|                |                            |          |
|----------------|----------------------------|----------|
| A_68_P05565706 | A230083G16Rik              | 2.029003 |
| A_68_P14536587 | Atp11c                     | 2.028972 |
| A_68_P04533410 | 2610524H06Rik              | 2.025811 |
| A_68_P01406624 | Bmf                        | 2.015335 |
| A_68_P07006300 | Indo11                     | 2.014286 |
| A_68_P06468835 | Homer2                     | 2.013563 |
| A_68_P01757589 | 1110002H13Rik-Adamts12     | 2.011019 |
| A_68_P08903907 | Tspan31-Centg1             | 2.010663 |
| A_68_P09697832 | Sec14l4                    | 2.009106 |
| A_68_P03852202 | Tbc1d2                     | 2.006292 |
| A_68_P06336609 | Gtf2h1                     | 2.004562 |
| A_68_P07017381 | Slc20a2                    | 2.002702 |
| A_68_P09264444 | Srebf1                     | 1.998832 |
| A_68_P14153156 | Chuk                       | 1.997575 |
| A_68_P04107141 | Dnajb6                     | 1.997288 |
| A_68_P13728082 | Lims2                      | 1.995951 |
| A_68_P03496599 | Il22ra1                    | 1.991967 |
| A_68_P09485551 | Mafg                       | 1.987257 |
| A_68_P03492105 | Galt                       | 1.986888 |
| A_68_P03361643 | Clta                       | 1.983516 |
| A_68_P09795589 | 1110008B24Rik              | 1.979197 |
| A_68_P00207772 | Lactb2                     | 1.978465 |
| A_68_P05754477 | C1rl                       | 1.974813 |
| A_68_P12046837 | ENSMUST00000083630.1:-1410 | 1.974438 |
| A_68_P11042264 | Jmy                        | 1.972869 |
| A_68_P09425721 | 2610019A05Rik              | 1.96943  |
| A_68_P03228980 | Acot7                      | 1.969102 |
| A_68_P06922348 | Insl3                      | 1.968286 |
| A_68_P07372436 | Ces6                       | 1.962542 |
| A_68_P06438929 | Cdkn1c                     | 1.962174 |
| A_68_P08546101 | Rdh7                       | 1.962033 |
| A_68_P03940509 | Adc                        | 1.960995 |
| A_68_P07154152 | Eif4ebp1                   | 1.960891 |
| A_68_P04111770 | Lrrc8d                     | 1.956755 |
| A_68_P10323285 | Rps6ka5                    | 1.956488 |

|                |               |          |
|----------------|---------------|----------|
| A_68_P12306569 | Cmb1          | 1.956434 |
| A_68_P12256637 | Lifr          | 1.955564 |
| A_68_P02046867 | Egfl7         | 1.953733 |
| A_68_P02200339 | Sema6d        | 1.950511 |
| A_68_P07002293 | Terf2         | 1.949812 |
| A_68_P04671642 | Unc84a        | 1.94961  |
| A_68_P10006538 | Rps6ka5       | 1.949041 |
| A_68_P04155063 | Evi5          | 1.949028 |
| A_68_P03513151 | Elovl1        | 1.946778 |
| A_68_P09689162 | Hoxb2         | 1.9445   |
| A_68_P10113544 | Bag5          | 1.944178 |
| A_68_P00303681 | Igfbp5        | 1.942407 |
| A_68_P01491133 | Acvr2a        | 1.942059 |
| A_68_P06682236 | Ing1          | 1.941668 |
| A_68_P10249145 | Tyki          | 1.940866 |
| A_68_P08621775 | Nab2          | 1.936782 |
| A_68_P02482324 | Pip5k1b-Vps72 | 1.934422 |
| A_68_P11477858 | Tpt1          | 1.930782 |
| A_68_P04764801 | Sh2b2         | 1.93055  |
| A_68_P03059990 | Ptgfr         | 1.928532 |
| A_68_P05057762 | Hk2           | 1.927756 |
| A_68_P03489466 | Ahdc1         | 1.925808 |
| A_68_P00625151 | Centg2        | 1.921725 |
| A_68_P13127101 | Csnk2b        | 1.921417 |
| A_68_P00372598 | Agxt          | 1.920314 |
| A_68_P12905298 | Rtp4          | 1.919099 |
| A_68_P06382815 | Cpeb1         | 1.919016 |
| A_68_P11890247 | Rbm9          | 1.917342 |
| A_68_P00379196 | Slc11a1       | 1.916193 |
| A_68_P04271280 | Mdh2          | 1.916104 |
| A_68_P08571770 | A630077B13Rik | 1.91345  |
| A_68_P13114736 | Lama1         | 1.913136 |
| A_68_P08296613 | Hkdc1         | 1.91036  |
| A_68_P05385669 | Thns12        | 1.90859  |
| A_68_P03285872 | Tnfrsf1b      | 1.908378 |

|                |                      |          |
|----------------|----------------------|----------|
| A_68_P05599970 | C1r                  | 1.908325 |
| A_68_P10002168 | Dpf3                 | 1.908274 |
| A_68_P06160077 | 1600014C10Rik        | 1.907732 |
| A_68_P09177526 | Atp5g1               | 1.906731 |
| A_68_P05419130 | Pzp                  | 1.90643  |
| A_68_P06098635 | Lrrc28               | 1.906233 |
| A_68_P02764965 | Tbl1xr1              | 1.905727 |
| A_68_P08583824 | Mbd3                 | 1.903545 |
| A_68_P03401481 | Zdhhc18              | 1.90218  |
| A_68_P01986063 | Mcm8                 | 1.899118 |
| A_68_P12645029 | Map6d1               | 1.898922 |
| A_68_P09654823 | AI595406             | 1.898247 |
| A_68_P11173103 | Abhd6                | 1.898195 |
| A_68_P00656928 | 2500001K11Rik        | 1.897566 |
| A_68_P14554864 | Mid1ip1              | 1.894417 |
| A_68_P09665920 | Tubd1                | 1.894158 |
| A_68_P03501268 | Akr1a4               | 1.892023 |
| A_68_P08777819 | Nfic                 | 1.890879 |
| A_68_P07559872 | Armet                | 1.890693 |
| A_68_P06109595 | Paox                 | 1.889424 |
| A_68_P13972593 | Prrc1                | 1.888095 |
| A_68_P04277062 | Cxcl1                | 1.88786  |
| A_68_P11927862 | Prlr                 | 1.885034 |
| A_68_P13173432 | Decr2                | 1.881355 |
| A_68_P13014388 | Atp6v1a-Nat13        | 1.881272 |
| A_68_P04346560 | Ankrd56              | 1.880436 |
| A_68_P11937882 | BC030396             | 1.879034 |
| A_68_P03654137 | St3gal3              | 1.877778 |
| A_68_P13560632 | Slc22a7              | 1.876822 |
| A_68_P13251986 | Srrm2                | 1.876383 |
| A_68_P07269129 | Ushbp1-5430437P03Rik | 1.875962 |
| A_68_P04346560 | Ankrd56              | 1.873934 |
| A_68_P07576746 | Dcamk13              | 1.873153 |
| A_68_P04019601 | Ccl27                | 1.87194  |
| A_68_P02748644 | Bcan                 | 1.870519 |

|                |               |          |
|----------------|---------------|----------|
| A_68_P13442963 | Clcn7         | 1.868043 |
| A_68_P01088601 | Rassf5        | 1.86686  |
| A_68_P04398638 | Evi5          | 1.866648 |
| A_68_P06212420 | Egln2         | 1.865091 |
| A_68_P02826367 | Fabp2         | 1.865027 |
| A_68_P00746014 | Il10          | 1.862417 |
| A_68_P04336891 | Pkd2          | 1.862199 |
| A_68_P03303258 | Errfi1        | 1.861575 |
| A_68_P14403538 | Cpt1a         | 1.857741 |
| A_68_P06872367 | Pcid2         | 1.85596  |
| A_68_P11100963 | Inhba         | 1.855446 |
| A_68_P14334327 | Acy3          | 1.855079 |
| A_68_P10309955 | Gsc           | 1.850686 |
| A_68_P01122382 | Srp9          | 1.850182 |
| A_68_P06738728 | Ddx28         | 1.848224 |
| A_68_P07781934 | Sidt2         | 1.846294 |
| A_68_P08204430 | Timp3         | 1.84597  |
| A_68_P14484742 | Dpf2          | 1.845285 |
| A_68_P03773670 | Tlr12         | 1.845033 |
| A_68_P08023922 | Smad6         | 1.843314 |
| A_68_P03818525 | Grhpr         | 1.842269 |
| A_68_P06181223 | Abcc6         | 1.83986  |
| A_68_P06677165 | Agt           | 1.838395 |
| A_68_P12298037 | Lynx1         | 1.836963 |
| A_68_P09108875 | Aatk          | 1.836674 |
| A_68_P02842022 | Sypl2         | 1.8352   |
| A_68_P14361889 | Chka          | 1.833384 |
| A_68_P06558085 | Cebpa         | 1.832806 |
| A_68_P08991556 | Mrps24        | 1.832014 |
| A_68_P10735909 | Hmgcr         | 1.83157  |
| A_68_P03305252 | Foxo6         | 1.830242 |
| A_68_P12600288 | Pcyt1a        | 1.830192 |
| A_68_P08248705 | 3110056O03Rik | 1.829078 |
| A_68_P01293547 | A530013C23Rik | 1.828284 |
| A_68_P06423010 | Abcc8         | 1.826431 |



|                |                            |          |
|----------------|----------------------------|----------|
| A_68_P08299334 | 1700021F05Rik              | 1.822089 |
| A_68_P08165567 | Usp4                       | 1.821966 |
| A_68_P09130970 | Fads6                      | 1.820172 |
| A_68_P12651548 | Pla1a                      | 1.819904 |
| A_68_P08936079 | A_68_P08936079             | 1.818224 |
| A_68_P01216441 | Src                        | 1.817777 |
| A_68_P02694381 | Magi3                      | 1.816313 |
| A_68_P02312547 | Ptgfrn                     | 1.814858 |
| A_68_P09070782 | Tbkbpl                     | 1.814167 |
| A_68_P05904665 | Hpxn                       | 1.813692 |
| A_68_P12966444 | Lpp                        | 1.813202 |
| A_68_P05896362 | Apoc4                      | 1.809549 |
| A_68_P09488544 | P4ha2                      | 1.808212 |
| A_68_P12046836 | ENSMUST00000083630.1:-2118 | 1.8081   |
| A_68_P14867946 | Aff2                       | 1.807574 |
| A_68_P12056452 | Slc39a4                    | 1.807308 |
| A_68_P03805515 | Ski                        | 1.80583  |
| A_68_P04542655 | Cdk8                       | 1.805226 |
| A_68_P09080012 | Gtlf3b                     | 1.804934 |
| A_68_P12237143 | Fkbp11                     | 1.804871 |
| A_68_P09404104 | Gm2a                       | 1.804803 |
| A_68_P09017231 | Gpx3                       | 1.804258 |
| A_68_P09641776 | Asgr1                      | 1.804029 |
| A_68_P12129693 | Csad                       | 1.803261 |
| A_68_P08777345 | Sumo3                      | 1.802674 |
| A_68_P13297332 | Slc37a1                    | 1.802587 |
| A_68_P03818525 | Grhpr                      | 1.801349 |
| A_68_P02161296 | Sulf2                      | 1.801007 |
| A_68_P05933804 | Thrsp                      | 1.799896 |
| A_68_P00327181 | Lemd1                      | 1.799492 |
| A_68_P10248166 | Rnf113a2                   | 1.79901  |
| A_68_P00652222 | Psen2                      | 1.798472 |
| A_68_P11066165 | Mtap1b                     | 1.797142 |
| A_68_P01772352 | Lcn12                      | 1.795051 |
| A_68_P13236370 | 1700001C19Rik              | 1.793518 |

|                |               |          |
|----------------|---------------|----------|
| A_68_P12129679 | Csad          | 1.792381 |
| A_68_P00418605 | Adora1        | 1.791288 |
| A_68_P05502098 | Cops7a        | 1.790002 |
| A_68_P13293578 | 1700012G19Rik | 1.788277 |
| A_68_P04144481 | Slc34a2       | 1.786972 |
| A_68_P08210289 | 9-Mar         | 1.785031 |
| A_68_P09886396 | 2310044G17Rik | 1.784424 |
| A_68_P06924447 | 0710008K08Rik | 1.784328 |
| A_68_P09354866 | Gucy2e        | 1.784312 |
| A_68_P04763153 | Rasal1        | 1.781054 |
| A_68_P02272802 | Plcb1         | 1.780157 |
| A_68_P02375830 | Pdzk1         | 1.77799  |
| A_68_P04379119 | Baiap211      | 1.777719 |
| A_68_P07210518 | F10           | 1.777548 |
| A_68_P12216260 | Hoxc8         | 1.777421 |
| A_68_P06494002 | Calm3         | 1.777314 |
| A_68_P01772847 | Ypel4         | 1.776762 |
| A_68_P06431278 | Zfp114        | 1.775592 |
| A_68_P03590695 | Nr0b2         | 1.7751   |
| A_68_P07455723 | Yap1          | 1.774206 |
| A_68_P13504342 | Tnfaip811     | 1.771455 |
| A_68_P14258825 | Mxi1          | 1.771178 |
| A_68_P13499441 | Slc29a1       | 1.769536 |
| A_68_P04267219 | Emid2         | 1.768563 |
| A_68_P08580643 | Amd1          | 1.768524 |
| A_68_P04586643 | Fbx110        | 1.768373 |
| A_68_P11723129 | 2600011E07Rik | 1.767973 |
| A_68_P00389624 | Cxcr4         | 1.767453 |
| A_68_P03791293 | Ipo13         | 1.767418 |
| A_68_P09312923 | Cacng5        | 1.767256 |
| A_68_P14089035 | Myoz3         | 1.765482 |
| A_68_P04617575 | Recc1         | 1.764499 |
| A_68_P08608506 | Lrrc10        | 1.764487 |
| A_68_P11342427 | Samd4         | 1.763249 |
| A_68_P09410100 | Dlx3          | 1.763049 |

|                |                     |          |
|----------------|---------------------|----------|
| A_68_P14271769 | Cstf2t              | 1.762759 |
| A_68_P01722996 | Pck1                | 1.762494 |
| A_68_P07966190 | Slc44a2             | 1.761603 |
| A_68_P06656873 | Gdpd5               | 1.761242 |
| A_68_P06047855 | Nupr1               | 1.761036 |
| A_68_P09969351 | Tmem18              | 1.761029 |
| A_68_P09529776 | Smardc2-Tcam1       | 1.757541 |
| A_68_P09422847 | Atox1               | 1.757212 |
| A_68_P07680483 | Thy1                | 1.756134 |
| A_68_P13909021 | Pmaip1              | 1.75557  |
| A_68_P09517349 | 1110020P15Rik       | 1.754214 |
| A_68_P11380311 | Itih4               | 1.752637 |
| A_68_P11311203 | Lrtm1               | 1.751689 |
| A_68_P08315623 | Ddt                 | 1.749203 |
| A_68_P06052290 | Neud4               | 1.748895 |
| A_68_P00899912 | Cnnm4               | 1.748735 |
| A_68_P06682522 | Herpud1             | 1.748028 |
| A_68_P10666960 | Jarid2              | 1.747577 |
| A_68_P06654366 | Plekhg2             | 1.744997 |
| A_68_P05299879 | Hoxa3               | 1.744924 |
| A_68_P13883453 | Pcdha8              | 1.744072 |
| A_68_P05472974 | 8430419L09Rik       | 1.743552 |
| A_68_P03520477 | Rgs3                | 1.742998 |
| A_68_P04267219 | Emid2               | 1.742067 |
| A_68_P05519175 | Mkln1               | 1.74127  |
| A_68_P11308602 | Tgm1                | 1.740967 |
| A_68_P14899047 | Tsc22d3             | 1.739306 |
| A_68_P04617575 | Recc1               | 1.737718 |
| A_68_P00716971 | Tnfrsf11a           | 1.736541 |
| A_68_P00815120 | Wdr26               | 1.736526 |
| A_68_P10168388 | Otub2               | 1.736092 |
| A_68_P09199922 | Pitpna              | 1.7346   |
| A_68_P10251388 | Glrx5               | 1.734567 |
| A_68_P08952297 | 1700052N19Rik-Rmnd1 | 1.734292 |
| A_68_P04925865 | Ncor2               | 1.733403 |

|                |                |          |
|----------------|----------------|----------|
| A_68_P09891693 | Cdk11          | 1.733125 |
| A_68_P08934064 | Nuak1          | 1.733077 |
| A_68_P07356450 | Cfdp1          | 1.731121 |
| A_68_P03386207 | Ece1           | 1.730575 |
| A_68_P13078804 | 0610016J10Rik  | 1.730287 |
| A_68_P03307843 | Hp1bp3         | 1.730017 |
| A_68_P02469440 | Atpla1         | 1.729773 |
| A_68_P02767804 | Bmpr1b         | 1.72913  |
| A_68_P00544739 | Pde6d-Cops7b   | 1.728242 |
| A_68_P08361803 | Gamt-Dazap1    | 1.726767 |
| A_68_P05059005 | 5730419I09Rik  | 1.724994 |
| A_68_P03540115 | Espn-Hes2      | 1.724554 |
| A_68_P07890306 | Axud1          | 1.72446  |
| A_68_P13156383 | Cryaa          | 1.720469 |
| A_68_P02163464 | D430028G21Rik  | 1.720247 |
| A_68_P07643197 | Ctdspl         | 1.718839 |
| A_68_P11779362 | Adcy4          | 1.716452 |
| A_68_P09926629 | BC048191:-5083 | 1.715671 |
| A_68_P11619267 | Cbln3          | 1.715361 |
| A_68_P10384816 | 1700020O03Rik  | 1.71321  |
| A_68_P09238680 | Psm11          | 1.711343 |
| A_68_P10402504 | Slc25a29       | 1.711268 |
| A_68_P06373804 | Ucp2           | 1.710468 |
| A_68_P00556266 | Ctdsp1         | 1.710246 |
| A_68_P01887581 | Shc4           | 1.708721 |
| A_68_P11069909 | Gcnt2          | 1.708597 |
| A_68_P03791284 | Ipo13          | 1.707785 |
| A_68_P00527441 | Tagln2         | 1.70755  |
| A_68_P04024977 | 6230416J20Rik  | 1.707465 |
| A_68_P08148553 | Raver1         | 1.706901 |
| A_68_P01061123 | Fzd5           | 1.704739 |
| A_68_P06628737 | Ppme1-AU020772 | 1.704599 |
| A_68_P14346830 | Gpam           | 1.704094 |
| A_68_P14285527 | Slc3a2         | 1.703612 |
| A_68_P02545158 | Cttnbp2nl      | 1.703145 |

|                |                      |          |
|----------------|----------------------|----------|
| A_68_P03305252 | Foxo6                | 1.701562 |
| A_68_P13330489 | Ehd3                 | 1.700505 |
| A_68_P04336891 | Pkd2                 | 1.700112 |
| A_68_P02124248 | Ndufa8               | 1.699006 |
| A_68_P01491115 | Acvr2a               | 1.698694 |
| A_68_P06529572 | LOC434179            | 1.697668 |
| A_68_P13784416 | Mapk4                | 1.69653  |
| A_68_P04163382 | Steap1               | 1.694702 |
| A_68_P03213988 | Eno1                 | 1.694444 |
| A_68_P05459814 | Eif4e3               | 1.693537 |
| A_68_P08019033 | A_68_P08019033       | 1.692033 |
| A_68_P02401061 | Ccdc109b             | 1.690838 |
| A_68_P13574622 | Efna5                | 1.690617 |
| A_68_P08138658 | AI593442             | 1.690179 |
| A_68_P07819977 | Elov15               | 1.690069 |
| A_68_P09913941 | Six4-Mnat1           | 1.689989 |
| A_68_P15004402 | Armxc6-Armcx3        | 1.689321 |
| A_68_P09363837 | Mapk7                | 1.689202 |
| A_68_P12306344 | Krt18                | 1.688743 |
| A_68_P08744512 | Ddo                  | 1.688455 |
| A_68_P03615374 | Laptm5               | 1.687311 |
| A_68_P11230853 | Jub                  | 1.68699  |
| A_68_P12027743 | Ghr                  | 1.686145 |
| A_68_P00114985 | D1Ert161e            | 1.685478 |
| A_68_P06994523 | Bst2                 | 1.684881 |
| A_68_P09384009 | Kcnj2                | 1.68472  |
| A_68_P05838606 | Cd9                  | 1.682847 |
| A_68_P09497502 | Krt23                | 1.68234  |
| A_68_P11180833 | Itih3                | 1.682029 |
| A_68_P14334322 | Acy3                 | 1.681512 |
| A_68_P09172525 | Rmnd5b               | 1.681227 |
| A_68_P11537411 | Nisch-Tnnc1          | 1.680721 |
| A_68_P01869763 | 2810030E01Rik-Mllt10 | 1.680439 |
| A_68_P09245273 | Lasp1                | 1.679214 |
| A_68_P05945053 | Usf2                 | 1.679064 |

|                |                |          |
|----------------|----------------|----------|
| A_68_P03635289 | Srrm1          | 1.678627 |
| A_68_P08125332 | Clk3           | 1.677992 |
| A_68_P03011101 | Tmem79         | 1.677599 |
| A_68_P07200083 | Snapc2         | 1.677559 |
| A_68_P09221382 | Lym7           | 1.676536 |
| A_68_P04024977 | 6230416J20Rik  | 1.674557 |
| A_68_P08817347 | Upb1           | 1.67346  |
| A_68_P02369472 | Palmd          | 1.673346 |
| A_68_P10147981 | Dnmt3a         | 1.673243 |
| A_68_P06416571 | Anpep          | 1.671084 |
| A_68_P12980215 | Cdgap          | 1.670838 |
| A_68_P02537358 | Il6ra          | 1.670733 |
| A_68_P09177531 | Atp5g1         | 1.668944 |
| A_68_P13351723 | Wdr24          | 1.668001 |
| A_68_P02691140 | D3Ucla1        | 1.66768  |
| A_68_P03795291 | Pink1          | 1.667548 |
| A_68_P07629982 | Tmed1          | 1.666914 |
| A_68_P08935606 | 1700060H10Rik  | 1.66646  |
| A_68_P14501275 | Syvn1          | 1.66549  |
| A_68_P05154910 | Hnrpf          | 1.665104 |
| A_68_P06166301 | Sphk2          | 1.66475  |
| A_68_P02004607 | Gm1631         | 1.664048 |
| A_68_P08893436 | Dos-Atp5d      | 1.663782 |
| A_68_P04763153 | Rasal1         | 1.66365  |
| A_68_P10211435 | Slc25a29       | 1.661095 |
| A_68_P10461509 | Arid4b         | 1.661061 |
| A_68_P11529693 | Synpo2l-Sec24c | 1.660902 |
| A_68_P12080801 | Krt18          | 1.660603 |
| A_68_P07506791 | Cck            | 1.659952 |
| A_68_P13297330 | Slc37a1        | 1.659631 |
| A_68_P10017918 | 2610204M08Rik  | 1.659385 |
| A_68_P03611397 | 4833401D15Rik  | 1.658251 |
| A_68_P06765322 | Wwc2           | 1.657722 |
| A_68_P12188742 | Slc39a4        | 1.657115 |
| A_68_P13415559 | Sepr1          | 1.656762 |

|                |               |          |
|----------------|---------------|----------|
| A_68_P09086358 | Gas2l1        | 1.65623  |
| A_68_P09185997 | Tmem97        | 1.656213 |
| A_68_P10437458 | Slc35b3       | 1.65504  |
| A_68_P11551201 | Ccdc25        | 1.653605 |
| A_68_P14474892 | Dak           | 1.653378 |
| A_68_P01237936 | Hnrpa3        | 1.651356 |
| A_68_P09442851 | Map2k4        | 1.650757 |
| A_68_P11947806 | Cacnb3        | 1.649653 |
| A_68_P00924507 | Efhd1         | 1.648142 |
| A_68_P03502660 | Aldh1b1       | 1.647413 |
| A_68_P02586990 | Tmem144       | 1.647299 |
| A_68_P09428652 | Nme1          | 1.647239 |
| A_68_P03145504 | Otud7b        | 1.647043 |
| A_68_P09134930 | Scn4a         | 1.64704  |
| A_68_P07391807 | Def8          | 1.646458 |
| A_68_P03590695 | Nr0b2         | 1.645978 |
| A_68_P12341810 | Plec1         | 1.645839 |
| A_68_P14176669 | Ehd1          | 1.645826 |
| A_68_P11574765 | Slc39a14      | 1.645729 |
| A_68_P06441611 | Mia1          | 1.645333 |
| A_68_P04089283 | Tnfrsf18      | 1.645211 |
| A_68_P03811860 | Lck           | 1.642307 |
| A_68_P07588985 | Birc3         | 1.64194  |
| A_68_P08949151 | Rassf3        | 1.641748 |
| A_68_P02046877 | Egfl7         | 1.640819 |
| A_68_P04377705 | Fbxl10        | 1.640446 |
| A_68_P14149983 | Tle4          | 1.639549 |
| A_68_P08672889 | Wibg          | 1.638666 |
| A_68_P04742466 | Ywhag         | 1.638592 |
| A_68_P12599267 | Etv5          | 1.638314 |
| A_68_P03758436 | Arid1a        | 1.637901 |
| A_68_P06095079 | Aldoa         | 1.637617 |
| A_68_P00761110 | 5033414K04Rik | 1.637491 |
| A_68_P08676565 | 9030224M15Rik | 1.635884 |
| A_68_P04156720 | Tpst2         | 1.635374 |

|                |            |          |
|----------------|------------|----------|
| A_68_P13999799 | Dpysl3     | 1.635239 |
| A_68_P06092905 | Rhpn2      | 1.635174 |
| A_68_P08833006 | Bsg        | 1.634862 |
| A_68_P06165341 | Dbp        | 1.634037 |
| A_68_P03726231 | Ptprf      | 1.633009 |
| A_68_P04515316 | Cdx2       | 1.632768 |
| A_68_P11226211 | Hs6st3     | 1.632336 |
| A_68_P09245907 | Ifi47      | 1.631707 |
| A_68_P02581367 | Wnt2b      | 1.63129  |
| A_68_P09621434 | Ttc1       | 1.630926 |
| A_68_P07012772 | Hand2      | 1.630586 |
| A_68_P06242258 | Ins2       | 1.630464 |
| A_68_P07189492 | BC015286   | 1.629805 |
| A_68_P03513612 | St3gal3    | 1.629487 |
| A_68_P05437345 | Rtkn       | 1.629321 |
| A_68_P02046834 | Egfl7      | 1.628973 |
| A_68_P08026226 | Sema3b     | 1.62869  |
| A_68_P09641035 | Tlx3       | 1.627931 |
| A_68_P13977871 | Pcdhga5    | 1.627913 |
| A_68_P01781180 | Bcas1      | 1.627627 |
| A_68_P07581377 | Zmynd10    | 1.627558 |
| A_68_P10699562 | Isca1      | 1.626009 |
| A_68_P04761491 | Sds        | 1.625947 |
| A_68_P10050045 | Etv1       | 1.623652 |
| A_68_P03233222 | Lyn        | 1.623174 |
| A_68_P11831952 | Elp3       | 1.622957 |
| A_68_P09565009 | D11Ert636e | 1.622855 |
| A_68_P03531428 | Capzb      | 1.622461 |
| A_68_P08201798 | Mon2       | 1.622447 |
| A_68_P08395271 | Smarcc2    | 1.622296 |
| A_68_P07684876 | Tgm4       | 1.620179 |
| A_68_P04458056 | Tomm7      | 1.619853 |
| A_68_P04372701 | Atp5k      | 1.619247 |
| A_68_P03341194 | Trp53inp1  | 1.618632 |
| A_68_P12162253 | Krt74      | 1.61845  |



|                |                |          |
|----------------|----------------|----------|
| A_68_P06203949 | Pnkp           | 1.618388 |
| A_68_P09561658 | Slc22a4        | 1.618194 |
| A_68_P14354305 | Rad9           | 1.618031 |
| A_68_P08064730 | 6230410P16Rik  | 1.617821 |
| A_68_P06221575 | 2400001E08Rik  | 1.617249 |
| A_68_P02480010 | Bmpr1b         | 1.615811 |
| A_68_P11457646 | Gja3           | 1.615353 |
| A_68_P09179041 | 1110067D22Rik  | 1.615282 |
| A_68_P03176910 | 6530418L21Rik  | 1.615154 |
| A_68_P08147797 | Trf            | 1.614962 |
| A_68_P14263582 | Foxb2          | 1.614787 |
| A_68_P02773136 | 5730470L24Rik  | 1.614178 |
| A_68_P11133900 | Lect1          | 1.614083 |
| A_68_P14186918 | Acsl5          | 1.612814 |
| A_68_P12590377 | Dnm1l          | 1.612755 |
| A_68_P08914346 | Aifm2          | 1.612555 |
| A_68_P01367672 | Rbck1          | 1.612233 |
| A_68_P06233679 | A_68_P06233679 | 1.611892 |
| A_68_P02025412 | Ntng2          | 1.611273 |
| A_68_P10974751 | Prr7           | 1.61105  |
| A_68_P10880824 | BC005537       | 1.610679 |
| A_68_P10689991 | Aldh5a1-Gpld1  | 1.610133 |
| A_68_P11082814 | Snag1          | 1.608855 |
| A_68_P06048158 | Pak4           | 1.608737 |
| A_68_P12250087 | Nup50          | 1.608595 |
| A_68_P13348089 | Slc29a1        | 1.608509 |
| A_68_P12267844 | Krt18          | 1.608247 |
| A_68_P04458056 | Tomm7          | 1.606483 |
| A_68_P06519319 | Fes            | 1.606293 |
| A_68_P04044353 | Med18          | 1.605962 |
| A_68_P09933404 | Cdc42bpb       | 1.605505 |
| A_68_P10942741 | Tmed9          | 1.603585 |
| A_68_P13382698 | BC048355       | 1.603392 |
| A_68_P04761491 | Sds            | 1.603189 |
| A_68_P07267949 | Adat1          | 1.602997 |

|                |               |          |
|----------------|---------------|----------|
| A_68_P11632582 | Zfp395        | 1.602811 |
| A_68_P08125324 | Clk3          | 1.602191 |
| A_68_P06322245 | Rrm1          | 1.601041 |
| A_68_P10261319 | Vipr2         | 1.600963 |
| A_68_P10290413 | Zfyve26       | 1.600039 |
| A_68_P04730242 | Otop1         | 1.599816 |
| A_68_P04551716 | Crybb3        | 1.599298 |
| A_68_P09870970 | Tspan13       | 1.598295 |
| A_68_P00312340 | Arpc5         | 1.597096 |
| A_68_P00401602 | En1           | 1.596417 |
| A_68_P00310817 | Klf7          | 1.595597 |
| A_68_P10946345 | A530095I07Rik | 1.595489 |
| A_68_P08152699 | Cep57         | 1.595465 |
| A_68_P03053569 | Crcr1         | 1.595044 |
| A_68_P07678840 | 2010110K16Rik | 1.595029 |
| A_68_P12449654 | Ankrd46       | 1.593971 |
| A_68_P01379456 | Nat5          | 1.593333 |
| A_68_P02064375 | 2610510H03Rik | 1.592596 |
| A_68_P06087354 | Pnpla2        | 1.592196 |
| A_68_P07069507 | Irf8          | 1.591495 |
| A_68_P14414972 | Ehbp111       | 1.590989 |
| A_68_P00953228 | Exo1          | 1.590859 |
| A_68_P09504059 | Kif1c         | 1.590584 |
| A_68_P10820641 | Zfp708        | 1.590447 |
| A_68_P14368537 | Ankrd1        | 1.589893 |
| A_68_P08321588 | BC025920      | 1.589707 |
| A_68_P03370361 | Cer1          | 1.588658 |
| A_68_P09786813 | Ptpn21        | 1.587859 |
| A_68_P13092632 | 2610110G12Rik | 1.58777  |
| A_68_P02581370 | Wnt2b         | 1.587644 |
| A_68_P01442677 | Adam33        | 1.586011 |
| A_68_P09235545 | Sectm1b       | 1.585228 |
| A_68_P03978335 | Rbm35a        | 1.58381  |
| A_68_P03349816 | Hkr3          | 1.583474 |
| A_68_P05279250 | Sfxn5         | 1.583147 |

|                |                             |          |
|----------------|-----------------------------|----------|
| A_68_P10772170 | Gpbp1                       | 1.583001 |
| A_68_P03611383 | 9530048O09Rik-4833401D15Rik | 1.582838 |
| A_68_P02139611 | Cry2                        | 1.582598 |
| A_68_P05979597 | Lsr                         | 1.582332 |
| A_68_P14345132 | Pcgf5                       | 1.582328 |
| A_68_P04671714 | Ttyh3                       | 1.582185 |
| A_68_P08815201 | Egr2                        | 1.582126 |
| A_68_P08314943 | Oaz1                        | 1.581132 |
| A_68_P11000432 | Elmo1                       | 1.580518 |
| A_68_P10671048 | Shc3                        | 1.58047  |
| A_68_P10574240 | Trim27                      | 1.580338 |
| A_68_P09477165 | Med11                       | 1.580178 |
| A_68_P13515767 | Psmb9                       | 1.579019 |
| A_68_P03670784 | Masp2                       | 1.578955 |
| A_68_P11760124 | Tssk4                       | 1.577968 |
| A_68_P14670347 | Ammecr1                     | 1.576865 |
| A_68_P13083393 | Rpp21                       | 1.576289 |
| A_68_P13732806 | Cdc25c                      | 1.576092 |
| A_68_P06734330 | Gtf2e2                      | 1.575478 |
| A_68_P08039933 | AU019823                    | 1.57489  |
| A_68_P09349695 | 2400006H24Rik               | 1.574472 |
| A_68_P09409119 | Gprc5c                      | 1.574418 |
| A_68_P14460066 | Sfrp5                       | 1.574369 |
| A_68_P06872414 | Efcbp2                      | 1.574224 |
| A_68_P07411612 | 5830416A07Rik               | 1.573943 |
| A_68_P09982964 | 2410016O06Rik               | 1.573101 |
| A_68_P10302919 | Ppp2r5c                     | 1.573089 |
| A_68_P01214326 | Nmt2                        | 1.573085 |
| A_68_P09071035 | Phospho1                    | 1.572794 |
| A_68_P05553670 | Rarres2                     | 1.572551 |
| A_68_P14232405 | Gpr137                      | 1.57222  |
| A_68_P00303683 | Igfbp5                      | 1.571916 |
| A_68_P02409507 | Sox2                        | 1.571894 |
| A_68_P12201222 | Cdc42ep1                    | 1.57174  |
| A_68_P04308259 | D830046C22Rik               | 1.571199 |

|                |               |          |
|----------------|---------------|----------|
| A_68_P03160430 | Mab2111       | 1.571106 |
| A_68_P06807426 | Lamp1         | 1.569412 |
| A_68_P14319765 | Ifit2         | 1.569215 |
| A_68_P10126148 | Lamb1-1       | 1.568291 |
| A_68_P13728079 | Lims2         | 1.568223 |
| A_68_P03705807 | Bsdc1         | 1.56785  |
| A_68_P04742466 | Ywhag         | 1.56752  |
| A_68_P04334909 | Slc2a9        | 1.566539 |
| A_68_P08124293 | 2410004A20Rik | 1.56634  |
| A_68_P12293869 | Cyp2d26       | 1.566215 |
| A_68_P01505261 | Fbxw5         | 1.566118 |
| A_68_P06837568 | Mtnr1a        | 1.564454 |
| A_68_P01772363 | Lcn12         | 1.562675 |
| A_68_P04308259 | D830046C22Rik | 1.562517 |
| A_68_P01313060 | Slc35c1       | 1.562355 |
| A_68_P12438209 | Pphln1        | 1.561591 |
| A_68_P00578461 | Zc3h11a       | 1.561212 |
| A_68_P14045959 | 4933403F05Rik | 1.560919 |
| A_68_P07137852 | 2010315L10Rik | 1.560897 |
| A_68_P08376641 | Lrrc3         | 1.55967  |
| A_68_P07835094 | Acy1          | 1.558895 |
| A_68_P04384115 | 3732412D22Rik | 1.557034 |
| A_68_P07099616 | 1500041N16Rik | 1.555909 |
| A_68_P00932178 | Epha4         | 1.555378 |
| A_68_P02868715 | Pklr          | 1.555266 |
| A_68_P02248603 | Snrpb         | 1.555167 |
| A_68_P08779311 | Cradd         | 1.554816 |
| A_68_P00372593 | Agxt          | 1.553863 |
| A_68_P03370361 | Cer1          | 1.55371  |
| A_68_P12133074 | 3-Sep         | 1.553401 |
| A_68_P03580331 | Btf3l4        | 1.553071 |
| A_68_P09287289 | Tk1           | 1.55279  |
| A_68_P11132853 | 5730469M10Rik | 1.552665 |
| A_68_P10610122 | Mxd3          | 1.552372 |
| A_68_P10924386 | Gpbp1         | 1.552291 |

|                |               |          |
|----------------|---------------|----------|
| A_68_P08007768 | Sidt2         | 1.552155 |
| A_68_P00625152 | Centg2        | 1.552045 |
| A_68_P12045613 | Tenc1         | 1.551177 |
| A_68_P06818505 | Usp10         | 1.551129 |
| A_68_P06782036 | Alg11         | 1.550423 |
| A_68_P05216651 | BC049816      | 1.550087 |
| A_68_P11336884 | Dhrs1         | 1.55008  |
| A_68_P06152810 | Prkcdbp       | 1.549171 |
| A_68_P12311790 | Plec1         | 1.548824 |
| A_68_P08826569 | L3mbtl3       | 1.54857  |
| A_68_P04557067 | Srd5a2l       | 1.548408 |
| A_68_P08161434 | Wdr51a        | 1.547545 |
| A_68_P13855408 | BC031181      | 1.547384 |
| A_68_P06788628 | BC021891      | 1.54653  |
| A_68_P06485428 | Arrb1         | 1.546202 |
| A_68_P07987068 | Pdcd7         | 1.545832 |
| A_68_P08755354 | Popdc3        | 1.545523 |
| A_68_P09736545 | Abca8b        | 1.545125 |
| A_68_P05919592 | Dctn5         | 1.545026 |
| A_68_P04333196 | 1110008J03Rik | 1.544959 |
| A_68_P08235834 | Ccdc38        | 1.54484  |
| A_68_P02273373 | 2610042O14Rik | 1.544522 |
| A_68_P13879047 | Ccdc68        | 1.544123 |
| A_68_P08906221 | Csnk1g2       | 1.543529 |
| A_68_P14228457 | Rrp12         | 1.543515 |
| A_68_P02828323 | Tnfsf10       | 1.543267 |
| A_68_P03787366 | Ssbp3         | 1.543113 |
| A_68_P03853104 | Tinagl        | 1.542871 |
| A_68_P08881687 | Ppa1          | 1.542429 |
| A_68_P07908610 | Slc44a2       | 1.541975 |
| A_68_P01943459 | Ctsz          | 1.541802 |
| A_68_P12809031 | Chrd          | 1.541505 |
| A_68_P13871637 | Ndst1         | 1.541193 |
| A_68_P06002891 | Actn4         | 1.541084 |
| A_68_P14311529 | Fkbp2         | 1.540579 |

|                |                             |          |
|----------------|-----------------------------|----------|
| A_68_P03883233 | Gpr157                      | 1.540441 |
| A_68_P13525866 | Snrpc                       | 1.540202 |
| A_68_P09598068 | Acox1                       | 1.539831 |
| A_68_P11835015 | Ppif                        | 1.539661 |
| A_68_P00783015 | Farp2                       | 1.539309 |
| A_68_P03491937 | 2610528J11Rik               | 1.539283 |
| A_68_P12250659 | 9330154K18Rik               | 1.539247 |
| A_68_P06871160 | Bst2-1110012M11Rik          | 1.538792 |
| A_68_P06435140 | Arhgef1                     | 1.537806 |
| A_68_P05740623 | Tmem43                      | 1.537391 |
| A_68_P03303259 | Errfi1                      | 1.537191 |
| A_68_P03747745 | Ptprf                       | 1.536366 |
| A_68_P05919068 | C79127-Rtn2                 | 1.535761 |
| A_68_P08883482 | Nhsl1                       | 1.535163 |
| A_68_P08377706 | Tle6                        | 1.53495  |
| A_68_P13080463 | Abcg8                       | 1.534941 |
| A_68_P09119456 | Spata20                     | 1.534564 |
| A_68_P11846764 | Cerk                        | 1.533896 |
| A_68_P04730667 | Ddx55                       | 1.533874 |
| A_68_P09320523 | Dynll2                      | 1.533421 |
| A_68_P02633829 | Palmd                       | 1.533341 |
| A_68_P14826906 | Gprasp1                     | 1.532992 |
| A_68_P04650751 | Ppargc1a                    | 1.532554 |
| A_68_P09492905 | Psmc3                       | 1.532448 |
| A_68_P14042388 | Ier3ip1                     | 1.532122 |
| A_68_P07829944 | Paqr9                       | 1.532087 |
| A_68_P11845292 | Krt84                       | 1.532078 |
| A_68_P06049595 | Ctbp2                       | 1.531918 |
| A_68_P04576046 | Wsb2                        | 1.531885 |
| A_68_P09926608 | BC048191:-5384              | 1.53188  |
| A_68_P05547809 | Lrrc23                      | 1.531873 |
| A_68_P03371533 | Tox                         | 1.531639 |
| A_68_P05591340 | Zyx                         | 1.531621 |
| A_68_P00445025 | H3f3a                       | 1.531609 |
| A_68_P10927198 | ENSMUST00000091828.3:101286 | 1.530827 |

|                |                            |          |
|----------------|----------------------------|----------|
| A_68_P03773699 | Tlr12                      | 1.530769 |
| A_68_P14455471 | Dmrt3                      | 1.530661 |
| A_68_P01584465 | Gata3                      | 1.530412 |
| A_68_P12189033 | Card10                     | 1.52987  |
| A_68_P11966468 | Bik                        | 1.529802 |
| A_68_P14148167 | Zdhhc6                     | 1.529502 |
| A_68_P06583812 | Zfp84                      | 1.529052 |
| A_68_P04306525 | Zan                        | 1.529023 |
| A_68_P09168843 | 2810408A11Rik              | 1.528653 |
| A_68_P09702045 | 9530068E07Rik              | 1.528526 |
| A_68_P09234373 | Lrrc59                     | 1.526122 |
| A_68_P10584493 | F12                        | 1.526038 |
| A_68_P04552046 | Tpst2                      | 1.525704 |
| A_68_P05762546 | Lrrtm1                     | 1.525479 |
| A_68_P07437462 | Brd7                       | 1.525369 |
| A_68_P01808653 | Edem2                      | 1.524744 |
| A_68_P13246201 | Slc9a3r2                   | 1.524637 |
| A_68_P04706193 | Denr                       | 1.52461  |
| A_68_P06687682 | Cyld                       | 1.524472 |
| A_68_P07173318 | Zfp709                     | 1.523687 |
| A_68_P00702326 | ENSMUST00000083599.1:-2617 | 1.523507 |
| A_68_P07584309 | Azi2                       | 1.522844 |
| A_68_P01823173 | Zc3h8                      | 1.522733 |
| A_68_P13436122 | Xdh                        | 1.522665 |
| A_68_P06862966 | Lcat                       | 1.522482 |
| A_68_P14155349 | Catsper1                   | 1.521839 |
| A_68_P06176024 | Tbc1d10b                   | 1.521695 |
| A_68_P10388625 | Psm3                       | 1.521571 |
| A_68_P04627439 | Perq1                      | 1.52125  |
| A_68_P10886970 | Thoc3                      | 1.521146 |
| A_68_P06125211 | Athl1                      | 1.520824 |
| A_68_P01774410 | 5430432M24Rik              | 1.520228 |
| A_68_P01269454 | Defb25-Rem1                | 1.519859 |
| A_68_P12204213 | Sh3bp1                     | 1.519619 |
| A_68_P05472973 | 8430419L09Rik              | 1.519542 |

|                |                 |          |
|----------------|-----------------|----------|
| A_68_P02567272 | Ptbp2           | 1.519195 |
| A_68_P02189755 | Hrh3            | 1.518957 |
| A_68_P12255657 | Baiap2l2        | 1.518597 |
| A_68_P12323106 | Jrk             | 1.517152 |
| A_68_P11167360 | Rpl15           | 1.516853 |
| A_68_P13720085 | Hsd17b4         | 1.51632  |
| A_68_P14319570 | Fen1            | 1.516319 |
| A_68_P09457808 | E230016K23Rik   | 1.516003 |
| A_68_P11018859 | Ibrdc2          | 1.515571 |
| A_68_P08297291 | Map2k2          | 1.515346 |
| A_68_P08147904 | Sacm11          | 1.515304 |
| A_68_P15093622 | Nxt2            | 1.514999 |
| A_68_P12929782 | Ap2m1           | 1.514902 |
| A_68_P06975176 | Cherp           | 1.514495 |
| A_68_P09689731 | Cygb            | 1.514231 |
| A_68_P09031138 | Rac3            | 1.514027 |
| A_68_P14462408 | Rtn3            | 1.513942 |
| A_68_P11125550 | Dzip1           | 1.513526 |
| A_68_P06920823 | Irf8            | 1.513158 |
| A_68_P04081645 | Dio1            | 1.512652 |
| A_68_P13533861 | Ddx11           | 1.51247  |
| A_68_P13204986 | 4931440B09Rik   | 1.511919 |
| A_68_P10148637 | Six1            | 1.511655 |
| A_68_P09309976 | Krt35           | 1.510478 |
| A_68_P01127569 | Tsga10-EG623661 | 1.510223 |
| A_68_P02450195 | Tspan5          | 1.510213 |
| A_68_P13195944 | Tsc2            | 1.510209 |
| A_68_P04706193 | Denr            | 1.509838 |
| A_68_P00372595 | Agxt            | 1.509235 |
| A_68_P09212392 | Atox1-G3bp      | 1.508725 |
| A_68_P09135433 | Spnb2           | 1.508485 |
| A_68_P08196421 | Myrip           | 1.508354 |
| A_68_P05978276 | Chst8           | 1.508244 |
| A_68_P01335447 | Tmem15          | 1.508123 |
| A_68_P02663973 | Slc7a11         | 1.508055 |



|                |               |          |
|----------------|---------------|----------|
| A_68_P06070085 | Nr2f2         | 1.508014 |
| A_68_P06737990 | Tm6sf2        | 1.507957 |
| A_68_P03223240 | Efhd2         | 1.507832 |
| A_68_P13337800 | Slc37a1       | 1.507134 |
| A_68_P05171782 | D330017J20Rik | 1.506412 |
| A_68_P02609116 | Ctbs          | 1.505324 |
| A_68_P14075007 | 2810433K01Rik | 1.504948 |
| A_68_P08706942 | Dazap1        | 1.504895 |
| A_68_P02569272 | Tmem144       | 1.504859 |
| A_68_P05270630 | Tada3l        | 1.504787 |
| A_68_P13560216 | Tmem63b       | 1.504767 |
| A_68_P02661989 | 3110045G13Rik | 1.504635 |
| A_68_P00183437 | Hsd11b1       | 1.504583 |
| A_68_P09561712 | Tbrg4         | 1.504062 |
| A_68_P06842888 | Nqo1          | 1.50378  |
| A_68_P12822563 | Glis2         | 1.503718 |
| A_68_P12410230 | Tmprss6       | 1.50269  |
| A_68_P09111113 | Stk10         | 1.50266  |
| A_68_P06239470 | 4632411J06Rik | 1.502557 |
| A_68_P09709914 | Igfbp1        | 1.502249 |
| A_68_P13194682 | Cfb           | 1.502245 |
| A_68_P01214281 | Nmt2          | 1.501857 |
| A_68_P04623587 | Actb          | 1.501291 |
| A_68_P04200611 | Abcb4         | 1.501289 |
| A_68_P01019744 | Cdc73         | 1.500788 |
| A_68_P00777015 | Tefap2b       | 1.500526 |
| A_68_P08293317 | Pah           | 1.500474 |
| A_68_P03116256 | Fdps          | 1.500366 |
| A_68_P06515895 | Klk7          | 1.500346 |
| A_68_P03580331 | Btf3l4        | 1.500274 |
| A_68_P06236098 | Numa1         | 1.50005  |
| A_68_P14154160 | Ina           | 1.499852 |
| A_68_P01581394 | Msrb2         | 1.499851 |
| A_68_P02538277 | 2810046L04Rik | 1.499431 |
| A_68_P03701939 | Ube4b         | 1.49933  |

|                |               |          |
|----------------|---------------|----------|
| A_68_P01773274 | Spol1         | 1.498968 |
| A_68_P08569765 | Mdm1          | 1.498929 |
| A_68_P13847539 | Pcdhga9       | 1.498679 |
| A_68_P05115327 | Lmo3          | 1.498207 |
| A_68_P04548189 | Mvk           | 1.497773 |
| A_68_P03303259 | Errf1         | 1.497325 |
| A_68_P04730242 | Otop1         | 1.497269 |
| A_68_P06987322 | Vps4a         | 1.496804 |
| A_68_P00072272 | Ptpn14        | 1.496656 |
| A_68_P05425988 | Uroc1         | 1.496605 |
| A_68_P04850699 | Slc24a6       | 1.496255 |
| A_68_P03848066 | A330049M08Rik | 1.49583  |
| A_68_P04166134 | Rheb          | 1.495697 |
| A_68_P12045626 | Tenc1         | 1.495185 |
| A_68_P04199401 | Gusb          | 1.494713 |
| A_68_P02095165 | A930034L06Rik | 1.494544 |
| A_68_P03285893 | Tnfrsf1b      | 1.494452 |
| A_68_P04567641 | A230097K15Rik | 1.49408  |
| A_68_P14926982 | Klhl13        | 1.493792 |
| A_68_P06280706 | Tmem126a      | 1.493113 |
| A_68_P01643192 | Psd4          | 1.493083 |
| A_68_P13069277 | Zfp161        | 1.492737 |
| A_68_P03821972 | Lrrm6c        | 1.492345 |
| A_68_P01833934 | Pax6          | 1.492224 |
| A_68_P13786129 | Zfp521        | 1.492141 |
| A_68_P08713341 | Apof          | 1.492023 |
| A_68_P08592121 | BC067068      | 1.491903 |
| A_68_P05489661 | Plxnd1        | 1.491591 |
| A_68_P04730667 | Ddx55         | 1.491466 |
| A_68_P12461401 | Sfrs2ip       | 1.491209 |
| A_68_P09032850 | Gja12         | 1.490339 |
| A_68_P08883504 | Nhs11         | 1.490069 |
| A_68_P04650751 | Ppargc1a      | 1.489565 |
| A_68_P04203052 | Oas3          | 1.489494 |
| A_68_P12264171 | Smug1         | 1.489468 |

|                |               |          |
|----------------|---------------|----------|
| A_68_P03328786 | Ube2j2        | 1.488864 |
| A_68_P13251990 | Srrm2         | 1.488836 |
| A_68_P07908749 | Coro2b        | 1.488818 |
| A_68_P00615596 | Mcm3          | 1.488505 |
| A_68_P01935105 | Trp53inp2     | 1.488119 |
| A_68_P03363098 | Map3k6        | 1.487913 |
| A_68_P03279715 | Tnfrsf14      | 1.487573 |
| A_68_P02931199 | Tspan5        | 1.487125 |
| A_68_P08264606 | Upb1          | 1.487112 |
| A_68_P04453201 | Gpr81         | 1.487078 |
| A_68_P10974141 | Ibrdc2        | 1.487075 |
| A_68_P05193196 | Bhlhb2        | 1.486407 |
| A_68_P06027163 | Furin         | 1.485408 |
| A_68_P05684309 | 1110061O04Rik | 1.485196 |
| A_68_P01092822 | Fmo1          | 1.485161 |
| A_68_P08398846 | BC030440      | 1.484813 |
| A_68_P02293895 | Wdr3          | 1.484784 |
| A_68_P04403724 | En2           | 1.484733 |
| A_68_P12384339 | Faim2         | 1.48465  |
| A_68_P12452838 | Pim3          | 1.484413 |
| A_68_P04237158 | Slc12a9       | 1.484049 |
| A_68_P13883460 | Pcdha9        | 1.483592 |
| A_68_P13221182 | 2300002M23Rik | 1.483365 |
| A_68_P10200952 | Tnfaip2       | 1.483083 |
| A_68_P04827265 | 6530401C20Rik | 1.482908 |
| A_68_P13379850 | Gfer          | 1.482626 |
| A_68_P10378975 | Otub2         | 1.482241 |
| A_68_P14239859 | Dmrt2         | 1.481924 |
| A_68_P12884206 | Dppa4         | 1.481689 |
| A_68_P03968747 | Melk          | 1.481554 |
| A_68_P08208323 | Tsfm          | 1.48144  |
| A_68_P04203052 | Oas3          | 1.481087 |
| A_68_P06465255 | Egln2         | 1.480924 |
| A_68_P11860531 | BC004728      | 1.480485 |
| A_68_P03773673 | Tlr12         | 1.480365 |

|                |                             |          |
|----------------|-----------------------------|----------|
| A_68_P11904302 | Mapk15                      | 1.480307 |
| A_68_P11197285 | Peli2                       | 1.480283 |
| A_68_P04200611 | Abcb4                       | 1.480071 |
| A_68_P09611503 | Doc2b                       | 1.480063 |
| A_68_P14380191 | Tmem20                      | 1.480031 |
| A_68_P05265653 | Aqp1                        | 1.479679 |
| A_68_P01810918 | Ascc3l1                     | 1.479564 |
| A_68_P07758524 | Nt5e                        | 1.478965 |
| A_68_P04664680 | Cldn3                       | 1.478748 |
| A_68_P03943090 | E130308A19Rik               | 1.478708 |
| A_68_P03435110 | Slc45a1                     | 1.478466 |
| A_68_P03736449 | Galt                        | 1.477605 |
| A_68_P13753170 | Mc5r                        | 1.477093 |
| A_68_P07480474 | Pthr1                       | 1.476385 |
| A_68_P08538263 | Gnptab                      | 1.476382 |
| A_68_P00952031 | 4930511H11Rik               | 1.476252 |
| A_68_P04333196 | 1110008J03Rik               | 1.476219 |
| A_68_P05259670 | EG232599                    | 1.475688 |
| A_68_P14475320 | Avp1l                       | 1.47559  |
| A_68_P03581858 | St3gal3                     | 1.47554  |
| A_68_P14380196 | Tmem20                      | 1.475082 |
| A_68_P09050344 | Irgm                        | 1.474905 |
| A_68_P05321910 | Kcnd2                       | 1.474903 |
| A_68_P05332408 | Wnt7a                       | 1.474868 |
| A_68_P09959320 | Hbp1                        | 1.474518 |
| A_68_P10346997 | BC022687                    | 1.474234 |
| A_68_P14467081 | 1810009A15Rik               | 1.474176 |
| A_68_P12269379 | Slc1a3                      | 1.473899 |
| A_68_P02205490 | Epb4.111                    | 1.473807 |
| A_68_P09109051 | Sat2                        | 1.473677 |
| A_68_P05357104 | Podxl2                      | 1.473383 |
| A_68_P03611411 | 9530048O09Rik-4833401D15Rik | 1.473271 |
| A_68_P03205122 | Tmem57                      | 1.473181 |
| A_68_P06458357 | Sphk2                       | 1.472909 |
| A_68_P00015050 | Tmcc2                       | 1.472899 |

|                |                |          |
|----------------|----------------|----------|
| A_68_P10442918 | Hist1h4c       | 1.472336 |
| A_68_P14357229 | Stx5a          | 1.47231  |
| A_68_P14180333 | Ppapdc2        | 1.472111 |
| A_68_P02139635 | Cry2           | 1.472067 |
| A_68_P14420911 | Slc1a1         | 1.472054 |
| A_68_P10322597 | Itpk1          | 1.471877 |
| A_68_P04908551 | Pptc7          | 1.471804 |
| A_68_P15175279 | Tcfe3          | 1.471577 |
| A_68_P10611060 | Gadd45g        | 1.470455 |
| A_68_P02981059 | Anxa9-Lass2    | 1.470382 |
| A_68_P01650076 | Slc23a2        | 1.470248 |
| A_68_P03589975 | Npal3          | 1.470064 |
| A_68_P08817697 | Sgk            | 1.470035 |
| A_68_P07723707 | Csk            | 1.47002  |
| A_68_P10664399 | Gpbp1          | 1.469917 |
| A_68_P08706306 | Lrig3          | 1.469894 |
| A_68_P03512349 | C1qa           | 1.469851 |
| A_68_P12896952 | A_68_P12896952 | 1.469748 |
| A_68_P03974014 | Gja4           | 1.469338 |
| A_68_P08310252 | Arid5b         | 1.469075 |
| A_68_P11769464 | E430028B21Rik  | 1.467519 |
| A_68_P04328380 | Hnrpd          | 1.467386 |
| A_68_P06666207 | Cd37           | 1.466997 |
| A_68_P09413365 | Og9x           | 1.466959 |
| A_68_P05085436 | 5730596B20Rik  | 1.466053 |
| A_68_P08464845 | ORF61          | 1.466034 |
| A_68_P04435271 | Man2b2         | 1.465602 |
| A_68_P07517444 | Apoa1          | 1.46503  |
| A_68_P09211126 | Serpinf1       | 1.464924 |
| A_68_P13439820 | Ptpsr          | 1.464498 |
| A_68_P03042236 | Rorc           | 1.464455 |
| A_68_P01238242 | Pacsin3        | 1.464309 |
| A_68_P00619216 | Nek2           | 1.464303 |
| A_68_P09355175 | Sirt7          | 1.464004 |
| A_68_P03176909 | 6530418L21Rik  | 1.463419 |

|                |               |          |
|----------------|---------------|----------|
| A_68_P04587149 | Dtx2          | 1.463352 |
| A_68_P13286081 | Gnmt          | 1.463125 |
| A_68_P12412293 | Irak4         | 1.462879 |
| A_68_P11625843 | Kcnma1        | 1.46168  |
| A_68_P09105482 | Kcnip1        | 1.461467 |
| A_68_P10412744 | Esrrb         | 1.461455 |
| A_68_P05623990 | Trh           | 1.461438 |
| A_68_P07370542 | 1700067K01Rik | 1.461293 |
| A_68_P07571962 | Smad6         | 1.461241 |
| A_68_P09553977 | Wip1          | 1.460796 |
| A_68_P07304573 | BC048644      | 1.460769 |
| A_68_P10735916 | Hmgcr         | 1.460451 |
| A_68_P05734059 | Uroc1         | 1.459961 |
| A_68_P12151407 | 2010109I03Rik | 1.459711 |
| A_68_P04338789 | Oas2          | 1.459507 |
| A_68_P14301707 | Rcor2         | 1.459389 |
| A_68_P14265560 | Sema4g        | 1.459317 |
| A_68_P09651374 | Actg1         | 1.459115 |
| A_68_P11746907 | Zfp503        | 1.459074 |
| A_68_P03226841 | Pla2g2c       | 1.459    |
| A_68_P07401393 | Unc13a-Jak3   | 1.458882 |
| A_68_P07237261 | Tubgcp3       | 1.458152 |
| A_68_P09413609 | Tk1           | 1.45776  |
| A_68_P08461195 | Ccdc53        | 1.457504 |
| A_68_P11855104 | 5730410E15Rik | 1.456762 |
| A_68_P07666214 | BC043934      | 1.456695 |
| A_68_P06327205 | Kcnc3         | 1.456661 |
| A_68_P04271916 | Idua          | 1.456311 |
| A_68_P08465588 | Prdm1         | 1.456099 |
| A_68_P08645665 | Dot1l         | 1.455854 |
| A_68_P12286824 | Prpf40b       | 1.455795 |
| A_68_P04055134 | Clspn         | 1.45562  |
| A_68_P12955390 | Hes1          | 1.45488  |
| A_68_P05271973 | Vhlh          | 1.45486  |
| A_68_P13130716 | Cacna1h       | 1.454817 |

|                |                            |          |
|----------------|----------------------------|----------|
| A_68_P03853104 | Tinagl                     | 1.454207 |
| A_68_P06519325 | Fes                        | 1.453941 |
| A_68_P11545530 | EG328479                   | 1.45386  |
| A_68_P13359207 | Lrpprc                     | 1.453509 |
| A_68_P08470122 | Lrrc10                     | 1.453151 |
| A_68_P08878746 | Myf5                       | 1.452546 |
| A_68_P11966471 | Bik                        | 1.452381 |
| A_68_P07060963 | Zdhhc7                     | 1.4523   |
| A_68_P11345930 | ENSMUST00000083663.1:-4472 | 1.450971 |
| A_68_P03634588 | Gjb5                       | 1.45094  |
| A_68_P09006057 | Hoxb4                      | 1.450782 |
| A_68_P11941919 | EG432987                   | 1.450437 |
| A_68_P05445839 | Shfm1                      | 1.450418 |
| A_68_P03786862 | Tmem64                     | 1.450056 |
| A_68_P10307843 | Smek1                      | 1.44999  |
| A_68_P11347888 | Bnip3l                     | 1.449971 |
| A_68_P01681120 | Hars2                      | 1.449803 |
| A_68_P13671847 | Pcdhgb8                    | 1.449786 |
| A_68_P13446694 | A_68_P13446694             | 1.449601 |
| A_68_P04012043 | C1qc                       | 1.449499 |
| A_68_P08866073 | Sycp3                      | 1.449455 |
| A_68_P13271863 | Gtf2h4                     | 1.448877 |
| A_68_P07350102 | Mbtps1                     | 1.44832  |
| A_68_P08817485 | D10Jhu81e                  | 1.448223 |
| A_68_P05358487 | Rassf8                     | 1.448168 |
| A_68_P08146769 | Tbx18                      | 1.447889 |
| A_68_P10702699 | Slc35d2                    | 1.447859 |
| A_68_P07188476 | St3gal2                    | 1.447195 |
| A_68_P07561953 | Aph1c                      | 1.447054 |
| A_68_P13146687 | A_68_P13146687             | 1.44675  |
| A_68_P13897391 | Trim36                     | 1.446738 |
| A_68_P09172542 | Myo1c                      | 1.446464 |
| A_68_P10205338 | Yy1                        | 1.446294 |
| A_68_P02983875 | 6330549D23Rik              | 1.446224 |
| A_68_P11173859 | Fgf17                      | 1.445486 |

|                |                     |          |
|----------------|---------------------|----------|
| A_68_P01397647 | 5730407K14Rik       | 1.445279 |
| A_68_P13889057 | Pqlc1               | 1.445208 |
| A_68_P09613151 | Eif4a3              | 1.44508  |
| A_68_P01220646 | 4833422F24Rik       | 1.44491  |
| A_68_P14071655 | Lipg                | 1.444906 |
| A_68_P08135755 | Tbx20               | 1.444635 |
| A_68_P03525379 | Dnajc6              | 1.444565 |
| A_68_P05193381 | Phf14               | 1.444277 |
| A_68_P04047544 | Icmt                | 1.444191 |
| A_68_P09409829 | 2310033P09Rik       | 1.444157 |
| A_68_P04518724 | Ubc                 | 1.443886 |
| A_68_P03010171 | C030011O14Rik-Usp33 | 1.443548 |
| A_68_P07234504 | Cdh1                | 1.443441 |
| A_68_P03334646 | Npr2                | 1.44343  |
| A_68_P07324810 | Hsd11b2             | 1.443287 |
| A_68_P13445330 | Tap2                | 1.443123 |
| A_68_P02983160 | Pcdh10              | 1.443029 |
| A_68_P10880830 | BC005537            | 1.44275  |
| A_68_P05987685 | Olfr503             | 1.442328 |
| A_68_P08204474 | Inhbe               | 1.442297 |
| A_68_P07953884 | Cbl                 | 1.442292 |
| A_68_P14380340 | Cdk2ap2             | 1.442253 |
| A_68_P13470840 | Snf1lk              | 1.44215  |
| A_68_P11658283 | Kenk5               | 1.441586 |
| A_68_P03406414 | Ubx3                | 1.441534 |
| A_68_P03568831 | Gjb3                | 1.441268 |
| A_68_P09016819 | Pcgf2               | 1.441229 |
| A_68_P09694962 | Hn1                 | 1.440619 |
| A_68_P00866288 | B3gnt7              | 1.440501 |
| A_68_P03498845 | Id3                 | 1.440415 |
| A_68_P08838102 | Rab32               | 1.440212 |
| A_68_P12199092 | 4930572J05Rik       | 1.440077 |
| A_68_P09550803 | Tnfrsf13            | 1.440059 |
| A_68_P02301823 | Tpd52               | 1.439817 |
| A_68_P07646992 | Als2cl              | 1.439145 |



|                |               |          |
|----------------|---------------|----------|
| A_68_P04400748 | Zcchc8        | 1.438848 |
| A_68_P04178073 | Phox2b        | 1.438624 |
| A_68_P10960939 | Cd83          | 1.438605 |
| A_68_P08356244 | Dusp6         | 1.438435 |
| A_68_P07631418 | Ap1m2         | 1.438401 |
| A_68_P09497481 | Krt23         | 1.438379 |
| A_68_P14346771 | Ms4a7         | 1.438087 |
| A_68_P07117899 | Zfp90         | 1.437828 |
| A_68_P03205122 | Tmem57        | 1.437755 |
| A_68_P01212050 | Tcfap2c       | 1.437727 |
| A_68_P08300127 | Olfir796      | 1.437219 |
| A_68_P06130973 | Tm6sf1        | 1.43721  |
| A_68_P00729624 | Susd4         | 1.436958 |
| A_68_P11308572 | Tgm1          | 1.436956 |
| A_68_P03766316 | Dffb          | 1.436953 |
| A_68_P06817355 | 1700067K01Rik | 1.436912 |
| A_68_P09694967 | Ghdc          | 1.436808 |
| A_68_P03987198 | Dio1          | 1.436744 |
| A_68_P10151513 | Psma6         | 1.436742 |
| A_68_P15013691 | Las1l         | 1.436736 |
| A_68_P06329715 | Tnfrsf19l     | 1.436433 |
| A_68_P07455275 | Plscr4        | 1.436274 |
| A_68_P07941290 | Ttc12         | 1.436246 |
| A_68_P06418431 | Ascl2         | 1.43618  |
| A_68_P04014066 | Mfsd2         | 1.435986 |
| A_68_P13972523 | Fchsdl        | 1.435936 |
| A_68_P14198543 | Tmem132a      | 1.435892 |
| A_68_P12371670 | Atp5g2        | 1.435802 |
| A_68_P04618587 | Fgl2          | 1.435778 |
| A_68_P09738639 | Doc2b         | 1.434645 |
| A_68_P02824099 | Mfn1          | 1.434416 |
| A_68_P13981763 | Mapk4         | 1.434064 |
| A_68_P12256635 | Lifr          | 1.433977 |
| A_68_P06357663 | Zfp536        | 1.433422 |
| A_68_P11249669 | Il17rb        | 1.433253 |

|                |                      |          |
|----------------|----------------------|----------|
| A_68_P14078494 | Slc25a46             | 1.433198 |
| A_68_P06865553 | Chrn3                | 1.433009 |
| A_68_P01157255 | Muc15                | 1.432698 |
| A_68_P00626527 | Atf3                 | 1.432621 |
| A_68_P12202170 | Grhl2                | 1.432486 |
| A_68_P12998516 | Olig1                | 1.432448 |
| A_68_P04146264 | Txk                  | 1.43237  |
| A_68_P04141689 | Srd5a2l              | 1.432019 |
| A_68_P06481214 | Ap2a1                | 1.431394 |
| A_68_P10478798 | Foxf2                | 1.431098 |
| A_68_P13840590 | Mppe1                | 1.431078 |
| A_68_P08817448 | D10Jhu81e            | 1.431062 |
| A_68_P02863075 | Crtc2                | 1.431041 |
| A_68_P06010301 | EG210155             | 1.430945 |
| A_68_P08979891 | Krt42                | 1.430717 |
| A_68_P04616479 | Hsd17b11             | 1.430139 |
| A_68_P06285193 | Pnkp                 | 1.430132 |
| A_68_P11857308 | Spatc1               | 1.430124 |
| A_68_P12916378 | Pigz                 | 1.429979 |
| A_68_P02375820 | Pdzk1                | 1.429251 |
| A_68_P12437623 | Ndufa6               | 1.428991 |
| A_68_P13384162 | Cd70                 | 1.428769 |
| A_68_P11226200 | Hs6st3               | 1.428643 |
| A_68_P08401341 | Rnf126-Fstl3         | 1.42858  |
| A_68_P01123531 | Mreg                 | 1.427345 |
| A_68_P07533203 | Snx22                | 1.426848 |
| A_68_P00181824 | Ccdc108              | 1.42615  |
| A_68_P12713735 | Atp5o                | 1.425642 |
| A_68_P12756270 | Pigz                 | 1.425371 |
| A_68_P13449298 | Scube3               | 1.425344 |
| A_68_P07504222 | Stt3b                | 1.425313 |
| A_68_P14355984 | Cybas3               | 1.425285 |
| A_68_P13339960 | Pde9a                | 1.42442  |
| A_68_P09701026 | Tcf2                 | 1.424155 |
| A_68_P04393156 | Trafd1-C330023M02Rik | 1.423769 |

|                |                             |          |
|----------------|-----------------------------|----------|
| A_68_P11522475 | 6720456H20Rik               | 1.423216 |
| A_68_P14303909 | 1700019N12Rik               | 1.423036 |
| A_68_P09330626 | Kcnab3                      | 1.422833 |
| A_68_P02818663 | Efna1                       | 1.422755 |
| A_68_P06985598 | Pkd112                      | 1.422495 |
| A_68_P08976711 | Aspscr1                     | 1.422151 |
| A_68_P07836928 | Nradd                       | 1.421921 |
| A_68_P09168851 | 2810408A11Rik-0610025P10Rik | 1.421339 |
| A_68_P11069210 | Shc3                        | 1.421312 |
| A_68_P08436624 | D630029K05Rik               | 1.421011 |
| A_68_P11561956 | Bnip3l                      | 1.420641 |
| A_68_P09565027 | D11Ertd636e                 | 1.420617 |
| A_68_P11534471 | Lgals3                      | 1.420573 |
| A_68_P03279715 | Tnfrsf14                    | 1.420541 |
| A_68_P03753591 | Hivep3                      | 1.420448 |
| A_68_P11708828 | Rnase10                     | 1.420242 |
| A_68_P05968610 | Fxyd1                       | 1.420085 |
| A_68_P08628535 | Lgr5                        | 1.419756 |
| A_68_P09109482 | Rars                        | 1.419538 |
| A_68_P06706577 | Irx5                        | 1.41944  |
| A_68_P15191852 | Ogt                         | 1.419377 |
| A_68_P09404111 | Gm2a                        | 1.419372 |
| A_68_P05567935 | Gcc1                        | 1.419256 |
| A_68_P01275891 | Fign                        | 1.419248 |
| A_68_P09937366 | Flrt2                       | 1.419085 |
| A_68_P06218982 | U2af2                       | 1.418837 |
| A_68_P01301589 | Acvr1                       | 1.418826 |
| A_68_P04562142 | Hsd17b11                    | 1.418792 |
| A_68_P12239462 | Dgat1                       | 1.418616 |
| A_68_P06633817 | Gm1082                      | 1.418121 |
| A_68_P08834134 | Ddit4                       | 1.417451 |
| A_68_P06548919 | Drd4                        | 1.417019 |
| A_68_P01678644 | Hck                         | 1.416811 |
| A_68_P00896703 | 2500001K11Rik               | 1.416706 |
| A_68_P05437348 | Rtkn                        | 1.416545 |

|                |          |          |
|----------------|----------|----------|
| A_68_P03534308 | Bsdc1    | 1.416436 |
| A_68_P07822223 | Nr2e3    | 1.416241 |
| A_68_P01657359 | BC020535 | 1.41608  |
| A_68_P01910329 | Grb14    | 1.416035 |
| A_68_P12991567 | Ppil2    | 1.4158   |
| A_68_P14960260 | Gpc4     | 1.415751 |
| A_68_P07663357 | Megf11   | 1.415656 |
| A_68_P04093287 | Cited4   | 1.414417 |
| A_68_P06595084 | Dpy19l3  | 1.414311 |
| A_68_P11711513 | Rpp14    | 1.414297 |
| A_68_P05998356 | Bnip3    | 1.414179 |
| A_68_P08888274 | Cd63     | 1.413673 |
| A_68_P10267584 | Pik3cg   | 1.413653 |
| A_68_P00522030 | Fev      | 1.413312 |
| A_68_P07896816 | Bnip2    | 1.413203 |
| A_68_P04976323 | Cdk8     | 1.413009 |
| A_68_P12071211 | Trib1    | 1.412917 |
| A_68_P05568084 | Ube2h    | 1.41275  |
| A_68_P12824258 | Adcy9    | 1.412542 |
| A_68_P05011827 | Ppm1k    | 1.412537 |
| A_68_P05032875 | Akr1b8   | 1.412516 |
| A_68_P03577203 | Wnt4     | 1.412179 |
| A_68_P06251950 | Pde2a    | 1.412121 |
| A_68_P07296135 | BC003267 | 1.412025 |
| A_68_P04225894 | Slc10a6  | 1.41192  |
| A_68_P11792784 | Nr1d2    | 1.411907 |
| A_68_P12701085 | Tbx1     | 1.411715 |
| A_68_P03842194 | C1qb     | 1.411368 |
| A_68_P08611292 | Tjp3     | 1.411262 |
| A_68_P08839310 | Snrpd3   | 1.410557 |
| A_68_P00626532 | Atf3     | 1.409928 |
| A_68_P04668612 | Qdpr     | 1.409669 |
| A_68_P08526195 | Gstt2    | 1.409095 |
| A_68_P12204339 | Panx2    | 1.40859  |
| A_68_P05634158 | Hoxa13   | 1.4084   |

|                |                    |          |
|----------------|--------------------|----------|
| A_68_P08586867 | Myf5               | 1.407948 |
| A_68_P01482299 | Zbp1               | 1.40785  |
| A_68_P07081044 | Fbxw9              | 1.407796 |
| A_68_P13443354 | Lrln2              | 1.407457 |
| A_68_P08917740 | Usp15              | 1.407389 |
| A_68_P03818522 | Grhpr              | 1.407176 |
| A_68_P08586858 | Myf5               | 1.406853 |
| A_68_P09645961 | OTTMUSG00000000934 | 1.406851 |
| A_68_P12638874 | Tbx1-4930588K23Rik | 1.406691 |
| A_68_P11984719 | Nr4a1              | 1.406403 |
| A_68_P05955052 | Hnrpl              | 1.406317 |
| A_68_P08815062 | Yeats4             | 1.406161 |
| A_68_P11899315 | BC024139           | 1.406085 |
| A_68_P09289135 | Pipox              | 1.405882 |
| A_68_P13374868 | Rps6ka2            | 1.405852 |
| A_68_P01897769 | F730014I05Rik      | 1.405616 |
| A_68_P07581953 | Foxl2              | 1.405551 |
| A_68_P07469052 | Usp2               | 1.405524 |
| A_68_P09455243 | Rnf185             | 1.405436 |
| A_68_P14254972 | Sh3pxd2a           | 1.404968 |
| A_68_P01310632 | Mett5d1-Kif18a     | 1.40493  |
| A_68_P04548189 | Mvk                | 1.404736 |
| A_68_P09287099 | D130058I21Rik      | 1.40361  |
| A_68_P12092104 | Krt79              | 1.403355 |
| A_68_P02033295 | Ccdc3              | 1.403106 |
| A_68_P07340578 | Uba52              | 1.403015 |
| A_68_P05599948 | C1r                | 1.402884 |
| A_68_P11235583 | Ccdc122            | 1.402699 |
| A_68_P08777342 | Sumo3              | 1.402462 |
| A_68_P07828967 | Ccdc84             | 1.40236  |
| A_68_P04635161 | Pomp               | 1.4014   |
| A_68_P05653925 | Pot1a              | 1.401393 |
| A_68_P13038294 | Klhl22             | 1.401296 |
| A_68_P09512336 | Osbp2              | 1.401245 |
| A_68_P08033503 | BC018242           | 1.401027 |

|                |                |          |
|----------------|----------------|----------|
| A_68_P10846718 | Ntrk2          | 1.400852 |
| A_68_P00372594 | Agxt           | 1.400527 |
| A_68_P01674991 | Sall4          | 1.400176 |
| A_68_P07876589 | Fbxo9-Ick      | 1.400175 |
| A_68_P06528889 | Nr2f2          | 1.399985 |
| A_68_P13396934 | Pspn           | 1.399967 |
| A_68_P10254185 | Egln3          | 1.39981  |
| A_68_P06116789 | Slc6a5         | 1.399372 |
| A_68_P08826802 | Hkdc1          | 1.399266 |
| A_68_P04013537 | Nsmaf          | 1.399119 |
| A_68_P10982190 | Rnf44-BC040758 | 1.39882  |
| A_68_P12186373 | Ly6i           | 1.398572 |
| A_68_P03889508 | Ppap2b         | 1.398415 |
| A_68_P09929935 | AI132487       | 1.398322 |
| A_68_P07249032 | Cdk10          | 1.398121 |
| A_68_P00557108 | Dnajb3-Ugt1a1  | 1.397994 |
| A_68_P04520897 | Wasf3          | 1.397786 |
| A_68_P06144845 | Tm2d3          | 1.397546 |
| A_68_P02994061 | Nudt6          | 1.397301 |
| A_68_P01251024 | Gfra4          | 1.397196 |
| A_68_P14437284 | 5730596K20Rik  | 1.397124 |
| A_68_P01853992 | Hoxd4          | 1.39679  |
| A_68_P03294383 | Masp2          | 1.396656 |
| A_68_P07433896 | Ptger1         | 1.396541 |
| A_68_P04616479 | Hsd17b11       | 1.396504 |
| A_68_P07107255 | Adecy7         | 1.396433 |
| A_68_P09685818 | Gal3st1        | 1.396188 |
| A_68_P03279739 | Tnfrsf14       | 1.396072 |
| A_68_P00471093 | Rgs7           | 1.395771 |
| A_68_P03755148 | Ddi2           | 1.395656 |
| A_68_P06124181 | Art5           | 1.395524 |
| A_68_P04604077 | Nkx6-1         | 1.395485 |
| A_68_P06562602 | BC048679       | 1.395233 |
| A_68_P01334676 | 9230107O10Rik  | 1.395156 |
| A_68_P09503250 | BC018371       | 1.394799 |

|                |                     |          |
|----------------|---------------------|----------|
| A_68_P08402819 | Pla2g12b            | 1.394699 |
| A_68_P03535794 | Tal2                | 1.394502 |
| A_68_P08384244 | 5330439J01Rik       | 1.394371 |
| A_68_P09096475 | Hexim1              | 1.394275 |
| A_68_P09441021 | D11Wsu99e-D11Wsu47e | 1.394258 |
| A_68_P03926366 | Lrrc42              | 1.393687 |
| A_68_P03634588 | Gjb5                | 1.393588 |
| A_68_P06664663 | Tex101              | 1.393323 |
| A_68_P09393624 | Myo18a              | 1.39329  |
| A_68_P06302675 | Cdkn1c-Slc22a18     | 1.39323  |
| A_68_P04809489 | Mfsd7               | 1.393038 |
| A_68_P07881511 | Ostb                | 1.39297  |
| A_68_P04108821 | 1110039B18Rik       | 1.392763 |
| A_68_P12293861 | Cyp2d26             | 1.392613 |
| A_68_P11848014 | Tob2                | 1.392516 |
| A_68_P09613181 | Coro6               | 1.392221 |
| A_68_P01910453 | C1qtnf4             | 1.392066 |
| A_68_P07471973 | Cdkn2d              | 1.39206  |
| A_68_P09016291 | Myo18a              | 1.391718 |
| A_68_P07030310 | Acta1               | 1.391687 |
| A_68_P09694966 | Hn1                 | 1.391387 |
| A_68_P10675646 | Tmem174             | 1.391176 |
| A_68_P03357445 | Rprc1               | 1.390793 |
| A_68_P03577203 | Wnt4                | 1.390543 |
| A_68_P12126766 | Tmprss6             | 1.390396 |
| A_68_P07498897 | Npsr1               | 1.390158 |
| A_68_P06323698 | Fgf21-Fut1          | 1.389935 |
| A_68_P05543283 | Kbtbd8              | 1.389905 |
| A_68_P11254372 | Ephx2               | 1.389425 |
| A_68_P14092716 | Hbegf               | 1.389316 |
| A_68_P13954256 | Malt1               | 1.389258 |
| A_68_P11746912 | Zfp503              | 1.388145 |
| A_68_P08204480 | Inhbe               | 1.388135 |
| A_68_P05307920 | Adipor2             | 1.388039 |
| A_68_P07448050 | Proz                | 1.387751 |

|                |               |          |
|----------------|---------------|----------|
| A_68_P05279238 | Sfxn5         | 1.387737 |
| A_68_P02234571 | Gm691         | 1.387597 |
| A_68_P01483724 | Ptk6          | 1.387365 |
| A_68_P13869080 | Hspa9         | 1.387173 |
| A_68_P00864420 | Lefty1        | 1.387151 |
| A_68_P10918505 | Phactr1       | 1.386866 |
| A_68_P01863211 | Cel           | 1.386746 |
| A_68_P08328254 | Sash1         | 1.386591 |
| A_68_P01443651 | Dph4          | 1.386206 |
| A_68_P04908551 | Pptc7         | 1.386072 |
| A_68_P09372910 | Lif           | 1.386032 |
| A_68_P03655045 | Pik3cd        | 1.385719 |
| A_68_P11916202 | Ttc33         | 1.385672 |
| A_68_P03452908 | Olf157        | 1.385543 |
| A_68_P01805516 | Tank          | 1.385473 |
| A_68_P02929745 | Efna4         | 1.385329 |
| A_68_P08924359 | Arid5b        | 1.38483  |
| A_68_P03938391 | Pef1          | 1.38467  |
| A_68_P09062144 | Fstl4         | 1.384531 |
| A_68_P14297183 | Hps6          | 1.384467 |
| A_68_P06519231 | 4933417E01Rik | 1.384303 |
| A_68_P03087427 | Pklr          | 1.384162 |
| A_68_P03460707 | 1810054D07Rik | 1.383547 |
| A_68_P04156716 | Tpst2         | 1.383382 |
| A_68_P13522497 | Foxp4         | 1.383341 |
| A_68_P00719128 | Lad1          | 1.383301 |
| A_68_P01396737 | Itgb6         | 1.383246 |
| A_68_P03974013 | Gja4          | 1.382937 |
| A_68_P13129124 | Tcp11         | 1.382829 |
| A_68_P09651125 | 2400006H24Rik | 1.382334 |
| A_68_P08408708 | Nudt4         | 1.382304 |
| A_68_P09191005 | Akap1         | 1.382135 |
| A_68_P10880009 | Fcho2         | 1.382073 |
| A_68_P01524680 | C230093N12Rik | 1.382037 |
| A_68_P10016006 | Bdkrb1        | 1.381879 |



|                |               |          |
|----------------|---------------|----------|
| A_68_P05459443 | Atoh8         | 1.381872 |
| A_68_P11389124 | Cog3          | 1.381589 |
| A_68_P15088553 | Tmem164       | 1.381575 |
| A_68_P07536331 | Lrrn6a        | 1.381362 |
| A_68_P01251537 | Gata5         | 1.381279 |
| A_68_P11865490 | Rai14         | 1.381127 |
| A_68_P07869246 | Nnmt          | 1.381111 |
| A_68_P00301978 | Ugcgl1        | 1.381093 |
| A_68_P13358098 | Zbtb12        | 1.380905 |
| A_68_P02686084 | Igsf3         | 1.380833 |
| A_68_P09307716 | Doc2b         | 1.380792 |
| A_68_P02230555 | C1qtnf4       | 1.380743 |
| A_68_P11380312 | Itih4         | 1.380728 |
| A_68_P00783024 | Farp2         | 1.380723 |
| A_68_P03067196 | P2ry1         | 1.380694 |
| A_68_P01846550 | Jph2          | 1.380631 |
| A_68_P01927620 | Neurod1       | 1.380513 |
| A_68_P05970860 | Phox2a        | 1.380406 |
| A_68_P04316025 | Arhgap24      | 1.380341 |
| A_68_P12268481 | Aqp2          | 1.380157 |
| A_68_P03290633 | Cdc20         | 1.379809 |
| A_68_P13445587 | Tbcc          | 1.379756 |
| A_68_P01480955 | D930001I22Rik | 1.379723 |
| A_68_P12113540 | 9130401M01Rik | 1.379607 |
| A_68_P07707920 | Scotin        | 1.37921  |
| A_68_P00336050 | Glul          | 1.379196 |
| A_68_P01982873 | BC066135      | 1.379019 |
| A_68_P08121432 | Rpl14         | 1.379    |
| A_68_P08195645 | Glb1          | 1.378778 |
| A_68_P01441335 | C630035N08Rik | 1.378713 |
| A_68_P11964810 | Cyp2d22       | 1.378636 |
| A_68_P08249583 | Rbms2         | 1.37863  |
| A_68_P03753591 | Hivep3        | 1.378012 |
| A_68_P14171474 | Prpf19        | 1.377885 |
| A_68_P12061660 | Cacnb3        | 1.37783  |

|                |                    |          |
|----------------|--------------------|----------|
| A_68_P11072806 | Tgfb1              | 1.377755 |
| A_68_P02283161 | 2310010M24Rik      | 1.377636 |
| A_68_P02814467 | Fgb-Plrg1          | 1.37743  |
| A_68_P07924824 | Col7a1             | 1.376996 |
| A_68_P14318689 | Pi4k2a             | 1.376537 |
| A_68_P03484747 | Pax7               | 1.376464 |
| A_68_P11201342 | Efha1              | 1.376296 |
| A_68_P08847295 | Egr2               | 1.376216 |
| A_68_P01722976 | Pck1               | 1.375718 |
| A_68_P03589975 | Npal3              | 1.375486 |
| A_68_P00145314 | B230209C24Rik      | 1.375474 |
| A_68_P10147980 | Dnmt3a             | 1.375059 |
| A_68_P09328696 | Thra               | 1.374982 |
| A_68_P11327352 | Kpna3              | 1.374889 |
| A_68_P03412051 | 1700018C11Rik      | 1.374741 |
| A_68_P09167140 | Hs3st3a1           | 1.374575 |
| A_68_P09313263 | Slc16a13           | 1.374498 |
| A_68_P05795785 | Shfm1              | 1.374492 |
| A_68_P04680665 | Pted1              | 1.3741   |
| A_68_P05452018 | Asns               | 1.374082 |
| A_68_P04316294 | Mapre3             | 1.37402  |
| A_68_P00547023 | Hsd17b7            | 1.373833 |
| A_68_P08582890 | Slc19a1            | 1.37352  |
| A_68_P06445706 | Rnf121             | 1.373222 |
| A_68_P14246998 | Dkk1               | 1.373103 |
| A_68_P09344068 | Cacnb1-Rpl19       | 1.373063 |
| A_68_P09850298 | Smoc1              | 1.372897 |
| A_68_P03987040 | Arhgef19           | 1.372813 |
| A_68_P11030208 | Ddx4-9130023D20Rik | 1.372699 |
| A_68_P00776600 | Bcs11              | 1.372601 |
| A_68_P03435110 | Slc45a1            | 1.372291 |
| A_68_P08007769 | Sidt2              | 1.372047 |
| A_68_P01524597 | Hspa12b            | 1.372041 |
| A_68_P01433156 | Pkp4               | 1.371939 |
| A_68_P08570664 | Tmem26             | 1.371764 |

|                |                           |          |
|----------------|---------------------------|----------|
| A_68_P13468024 | Unkl                      | 1.371743 |
| A_68_P00174516 | Chrnd                     | 1.371641 |
| A_68_P05244159 | ENSMUST00000083652.1:2772 | 1.371606 |
| A_68_P05049344 | Slc6a6                    | 1.371554 |
| A_68_P02255259 | Barhl1                    | 1.370922 |
| A_68_P10354469 | Jag2                      | 1.370889 |
| A_68_P05936205 | Ifitm5                    | 1.370722 |
| A_68_P06370386 | Bnc1                      | 1.370363 |
| A_68_P01091016 | Msc                       | 1.370344 |
| A_68_P02192119 | Id1                       | 1.370226 |
| A_68_P05058253 | Arf5                      | 1.36998  |
| A_68_P07892558 | Isl2                      | 1.369729 |
| A_68_P09015240 | Naglu                     | 1.369264 |
| A_68_P14499945 | Rab1b                     | 1.369186 |
| A_68_P04877098 | Slc2a9                    | 1.368716 |
| A_68_P12343989 | 1810044A24Rik             | 1.368601 |
| A_68_P08846688 | Spryd4                    | 1.3683   |
| A_68_P01348835 | Kynu                      | 1.368157 |
| A_68_P14231961 | Cnm2                      | 1.367965 |
| A_68_P13126791 | Atp6v1g2                  | 1.367869 |
| A_68_P06061323 | Kdelr1                    | 1.367856 |
| A_68_P06480423 | Lgals4                    | 1.367703 |
| A_68_P07976988 | 4733401H18Rik-Dalrd3      | 1.367257 |
| A_68_P01655862 | F730014I05Rik             | 1.367217 |
| A_68_P07872086 | Tmem108                   | 1.366956 |
| A_68_P13172213 | Ccnf                      | 1.366942 |
| A_68_P07434767 | Insl3                     | 1.366922 |
| A_68_P14478305 | Dmrt3                     | 1.366788 |
| A_68_P11209114 | Camk2g                    | 1.366663 |
| A_68_P15169058 | Bcor                      | 1.366594 |
| A_68_P02180398 | Ovol2                     | 1.366446 |
| A_68_P06011169 | BC057627                  | 1.366415 |
| A_68_P01505234 | Set                       | 1.36641  |
| A_68_P11659210 | Fbxl3                     | 1.366291 |
| A_68_P11333407 | 1810034K20Rik             | 1.36605  |

|                |               |          |
|----------------|---------------|----------|
| A_68_P06948293 | Dctn6         | 1.365828 |
| A_68_P05893701 | 6330512M04Rik | 1.365626 |
| A_68_P09402805 | Lhx1          | 1.365573 |
| A_68_P14205827 | Fen1          | 1.365296 |
| A_68_P12412503 | Cyp2d22       | 1.365036 |
| A_68_P13159875 | Tnfrsf14      | 1.365005 |
| A_68_P09477301 | Hoxb5         | 1.364903 |
| A_68_P02711952 | Ccna2         | 1.364885 |
| A_68_P01735828 | Serping1      | 1.364832 |
| A_68_P05052721 | Atoh8         | 1.364831 |
| A_68_P03890853 | Epha8         | 1.36456  |
| A_68_P09389126 | Aurkb         | 1.364507 |
| A_68_P12320215 | Myo10         | 1.364325 |
| A_68_P08894237 | Ftcd          | 1.364095 |
| A_68_P14429653 | Pitx3         | 1.363858 |
| A_68_P09840571 | Hs1bp3        | 1.363666 |
| A_68_P04412246 | Dgkq          | 1.36329  |
| A_68_P07202004 | 1200003I07Rik | 1.363146 |
| A_68_P14335363 | Dpf2          | 1.363058 |
| A_68_P04406264 | Sri           | 1.363057 |
| A_68_P04441942 | 4930519G04Rik | 1.362966 |
| A_68_P00331311 | EG240916      | 1.362892 |
| A_68_P06124180 | Art5          | 1.362879 |
| A_68_P06602766 | Homer2        | 1.362786 |
| A_68_P10658756 | Cartpt        | 1.3627   |
| A_68_P05522702 | 9130019P16Rik | 1.362239 |
| A_68_P09118933 | Pib5pa        | 1.362119 |
| A_68_P09985893 | Mia2          | 1.361866 |
| A_68_P08643752 | Rtn4ip1       | 1.361839 |
| A_68_P05938143 | Klk15         | 1.361748 |
| A_68_P10418410 | Mgat2         | 1.361533 |
| A_68_P03954968 | Eno1          | 1.361501 |
| A_68_P04945718 | Preb-Tcf23    | 1.361425 |
| A_68_P14229235 | Cpn1          | 1.361424 |
| A_68_P07029190 | Sh3rf1        | 1.361375 |

|                |                      |          |
|----------------|----------------------|----------|
| A_68_P01345408 | Api5                 | 1.361265 |
| A_68_P07005244 | Best2                | 1.361143 |
| A_68_P11868103 | Khdrbs3              | 1.361098 |
| A_68_P04093054 | Gm694-Zbtb17         | 1.360762 |
| A_68_P04618584 | Fgl2                 | 1.360719 |
| A_68_P09172983 | Sec14l4              | 1.360609 |
| A_68_P06852818 | Cul4a                | 1.360397 |
| A_68_P00836926 | Eif4e2               | 1.360378 |
| A_68_P08725568 | Akap12               | 1.360367 |
| A_68_P04945718 | Preb-Tcf23           | 1.360191 |
| A_68_P00480042 | F13b                 | 1.360155 |
| A_68_P09261609 | Hoxb13               | 1.3598   |
| A_68_P08844667 | Shmt2                | 1.359771 |
| A_68_P04393156 | Trafd1-C330023M02Rik | 1.359573 |
| A_68_P07019190 | Hmox1                | 1.359116 |
| A_68_P11884951 | Cbx7                 | 1.359049 |
| A_68_P14159031 | Atad1                | 1.358331 |
| A_68_P09042930 | Sectm1a              | 1.358075 |
| A_68_P09212221 | G6pc                 | 1.357706 |
| A_68_P03419478 | 1200015A19Rik        | 1.357664 |
| A_68_P06848303 | Slc7a6               | 1.357514 |
| A_68_P10912255 | Abt1                 | 1.357501 |
| A_68_P13547882 | Pla2g7               | 1.35728  |
| A_68_P04141273 | Dnajc2               | 1.357091 |
| A_68_P11720885 | Pcdh17               | 1.356579 |
| A_68_P02766324 | Vps45                | 1.356517 |
| A_68_P11409158 | Egr3                 | 1.356206 |
| A_68_P06545205 | Herc2                | 1.355988 |
| A_68_P09683452 | Trim47               | 1.355706 |
| A_68_P13224117 | Fkbp1                | 1.355488 |
| A_68_P04964439 | Tmem132d             | 1.355053 |
| A_68_P10277554 | Adssl1               | 1.354443 |
| A_68_P08848709 | Kcnmb4               | 1.354411 |
| A_68_P14159522 | Slit1                | 1.354406 |
| A_68_P02935668 | Zfand1               | 1.354143 |

|                |                  |          |
|----------------|------------------|----------|
| A_68_P08669008 | Snrpd3           | 1.354006 |
| A_68_P09187052 | Tbrg4            | 1.353905 |
| A_68_P06293636 | Luzp2            | 1.353853 |
| A_68_P12069241 | Phf5a            | 1.353812 |
| A_68_P07279929 | Bcar1            | 1.353809 |
| A_68_P06230676 | Capns1           | 1.353677 |
| A_68_P04222873 | A_68_P04222873   | 1.353354 |
| A_68_P00780459 | 4930418G15Rik    | 1.353342 |
| A_68_P05316111 | Prdm5            | 1.353247 |
| A_68_P09739941 | Hoxb7            | 1.352059 |
| A_68_P04406264 | Sri              | 1.351855 |
| A_68_P04877098 | Slc2a9           | 1.351658 |
| A_68_P07279933 | Bcar1            | 1.351642 |
| A_68_P04155853 | Vdp              | 1.351424 |
| A_68_P14345739 | Vegfb            | 1.351423 |
| A_68_P09032908 | Gja12            | 1.351397 |
| A_68_P14219536 | Klf9             | 1.351378 |
| A_68_P07618605 | Gnai2            | 1.35125  |
| A_68_P04384102 | 3732412D22Rik    | 1.351162 |
| A_68_P01199031 | NM_027230:-11579 | 1.351084 |
| A_68_P01164203 | Mcts2            | 1.350976 |
| A_68_P08160048 | Paqr5            | 1.350869 |
| A_68_P07806205 | Col12a1          | 1.35078  |
| A_68_P03966293 | Dmbx1            | 1.35072  |
| A_68_P08907272 | Gng7             | 1.350645 |
| A_68_P12303298 | Hoxc8            | 1.350252 |
| A_68_P04937975 | Ncor2            | 1.350173 |
| A_68_P11984771 | 3-Sep            | 1.350123 |
| A_68_P13294540 | Arrdc5-Uhrf1     | 1.34999  |
| A_68_P13251553 | Ergic1           | 1.349967 |
| A_68_P03755098 | Ndufs5           | 1.349936 |
| A_68_P07179485 | Fgfr1            | 1.349803 |
| A_68_P03296241 | Edg2             | 1.349727 |
| A_68_P10905572 | Nrn1             | 1.34968  |
| A_68_P04510543 | Nos3             | 1.349518 |

|                |                     |          |
|----------------|---------------------|----------|
| A_68_P06929857 | Tpm4                | 1.349483 |
| A_68_P02390624 | Crcr1               | 1.349158 |
| A_68_P07172113 | Kcnn1-A230052G05Rik | 1.349071 |
| A_68_P09369987 | Apoh                | 1.349015 |
| A_68_P14038094 | Sh3tc2              | 1.348769 |
| A_68_P07807897 | Plscr2              | 1.348715 |
| A_68_P00542050 | Npas2               | 1.348586 |
| A_68_P13388154 | Bat5                | 1.348585 |
| A_68_P12836522 | Bdh1                | 1.348484 |
| A_68_P13747694 | Rnuxa               | 1.348397 |
| A_68_P06035698 | Plekhf1             | 1.348306 |
| A_68_P00711134 | Slc45a3             | 1.348202 |
| A_68_P14849946 | Kcnd1               | 1.347914 |
| A_68_P10564825 | Emb                 | 1.34784  |
| A_68_P03318310 | Slc6a9              | 1.34777  |
| A_68_P11517987 | Lgi3                | 1.347758 |
| A_68_P09089981 | Tax1bp3             | 1.347588 |
| A_68_P03452908 | Olf157              | 1.347536 |
| A_68_P02991577 | Sec22b              | 1.347466 |
| A_68_P08773234 | Ikzf4               | 1.346955 |
| A_68_P05918934 | Peg3                | 1.346499 |
| A_68_P02412661 | Cyr61               | 1.346407 |
| A_68_P12213551 | Gpihbp1             | 1.346302 |
| A_68_P03755813 | Nans                | 1.346246 |
| A_68_P12242254 | Syng1               | 1.345938 |
| A_68_P06522134 | Vps33b              | 1.345822 |
| A_68_P01498090 | Plcg1               | 1.345814 |
| A_68_P09629443 | Kctd2               | 1.345761 |
| A_68_P04193832 | Nudt1               | 1.345384 |
| A_68_P06983274 | Jund1               | 1.345365 |
| A_68_P03959086 | Slc45a1             | 1.345095 |
| A_68_P10202512 | Lin52               | 1.344946 |
| A_68_P11680943 | Entpd4              | 1.344925 |
| A_68_P04316025 | Arhgap24            | 1.344622 |
| A_68_P09776288 | Acot1               | 1.344496 |

|                |                     |          |
|----------------|---------------------|----------|
| A_68_P14207949 | D930010J01Rik       | 1.344216 |
| A_68_P10251378 | Glrx5               | 1.344153 |
| A_68_P07939274 | 4931406C07Rik-Josd3 | 1.344001 |
| A_68_P04331822 | Cdc7                | 1.343979 |
| A_68_P07688516 | 2200002K05Rik       | 1.343834 |
| A_68_P07718457 | Topbp1              | 1.343785 |
| A_68_P09515612 | Arl5c               | 1.34352  |
| A_68_P06504997 | Slc5a2              | 1.343518 |
| A_68_P07887108 | Dock6               | 1.343508 |
| A_68_P00418617 | Adora1              | 1.343472 |
| A_68_P03273020 | Srrm1               | 1.342971 |
| A_68_P14423460 | Ehd1                | 1.34275  |
| A_68_P04629383 | Pitpnm2             | 1.342653 |
| A_68_P09340278 | Cd300e              | 1.342653 |
| A_68_P05255015 | Hoxa2               | 1.342652 |
| A_68_P03954968 | Eno1                | 1.342574 |
| A_68_P09459434 | Dus11               | 1.342536 |
| A_68_P01813685 | Dolpp1              | 1.342438 |
| A_68_P04836896 | A330070K13Rik       | 1.342419 |
| A_68_P04062108 | Rpl11               | 1.342401 |
| A_68_P13873326 | Nfatc1              | 1.342216 |
| A_68_P03439034 | 2810432D09Rik       | 1.342085 |
| A_68_P09758153 | Lrrc9               | 1.342081 |
| A_68_P13436543 | Bysl                | 1.34191  |
| A_68_P08531371 | Nfic                | 1.341815 |
| A_68_P04944285 | Zfand2a             | 1.341688 |
| A_68_P02567209 | Cth                 | 1.341618 |
| A_68_P14961796 | Trpc5               | 1.341591 |
| A_68_P07349274 | Rbm13               | 1.341505 |
| A_68_P09374043 | Trim47              | 1.341361 |
| A_68_P04803354 | Arpc1b              | 1.341301 |
| A_68_P00206509 | St8sia4             | 1.341296 |
| A_68_P12438489 | Sfrs2ip             | 1.341195 |
| A_68_P12930757 | Usp25               | 1.341182 |
| A_68_P00882129 | 2310038H17Rik       | 1.341068 |



|                |               |          |
|----------------|---------------|----------|
| A_68_P14109314 | Osbpl1a       | 1.340885 |
| A_68_P02219550 | Traf1         | 1.340575 |
| A_68_P08679914 | Scyl2         | 1.340469 |
| A_68_P04093287 | Cited4        | 1.34041  |
| A_68_P03930447 | Cldn19        | 1.340004 |
| A_68_P10050034 | Trmt5         | 1.339914 |
| A_68_P11924228 | L3mbtl2       | 1.339842 |
| A_68_P12189029 | Card10        | 1.339354 |
| A_68_P04493529 | Tbx3          | 1.339308 |
| A_68_P09512501 | Butr1         | 1.339248 |
| A_68_P00163908 | Twist2        | 1.339236 |
| A_68_P01248802 | Lrrc4c        | 1.339142 |
| A_68_P01823709 | Nphp1         | 1.339022 |
| A_68_P01075327 | Nmur1         | 1.338942 |
| A_68_P05653891 | Pde3a         | 1.338797 |
| A_68_P01396752 | Itgb6         | 1.338786 |
| A_68_P10703955 | Bhmt          | 1.338775 |
| A_68_P15177773 | Nsbp1         | 1.338724 |
| A_68_P11648927 | Mettl6        | 1.338673 |
| A_68_P08773799 | Dnajc14       | 1.338628 |
| A_68_P05150769 | Tax1bp1       | 1.33797  |
| A_68_P08979889 | Krt42         | 1.337941 |
| A_68_P04225894 | Slc10a6       | 1.337922 |
| A_68_P15175273 | Tefe3         | 1.337766 |
| A_68_P05428176 | Slc2a3        | 1.337702 |
| A_68_P13502362 | Lsm2          | 1.337471 |
| A_68_P09298703 | Myo18a        | 1.337009 |
| A_68_P12097337 | Krt73         | 1.336887 |
| A_68_P05233471 | 1110001J03Rik | 1.336783 |
| A_68_P03360536 | 2410166I05Rik | 1.336782 |
| A_68_P01092733 | Lbr           | 1.336759 |
| A_68_P03307859 | Hp1bp3        | 1.336706 |
| A_68_P00401634 | Adora1        | 1.336581 |
| A_68_P01553757 | Mapk8ip1      | 1.336339 |
| A_68_P10316211 | Zfyve26       | 1.336171 |

|                |               |          |
|----------------|---------------|----------|
| A_68_P09640992 | Psmc3ip       | 1.336165 |
| A_68_P06887604 | Hsf4          | 1.336164 |
| A_68_P06706147 | BC021891      | 1.336058 |
| A_68_P07337104 | Gfod2         | 1.335881 |
| A_68_P06926624 | A230052G05Rik | 1.335854 |
| A_68_P01342599 | 2010011I20Rik | 1.33585  |
| A_68_P02265690 | C230093N12Rik | 1.335798 |
| A_68_P09379981 | Smarcd2-Tcam1 | 1.33561  |
| A_68_P14525996 | Timm8a1       | 1.335288 |
| A_68_P09104644 | Aatk          | 1.335067 |
| A_68_P04735366 | Ugt2a3        | 1.334872 |
| A_68_P04308903 | Areg          | 1.334266 |
| A_68_P04062108 | Rpl11         | 1.334152 |
| A_68_P09582843 | Itga3         | 1.334047 |
| A_68_P09021305 | Fmnl1         | 1.333958 |
| A_68_P14711280 | Gpr64         | 1.333822 |
| A_68_P04162059 | Zfp326        | 1.333766 |
| A_68_P04580659 | Mpv17         | 1.333711 |
| A_68_P14431095 | Chuk          | 1.333707 |
| A_68_P05935174 | Cd33          | 1.3337   |
| A_68_P01869178 | Foxa2         | 1.333583 |
| A_68_P05543279 | Kbtbd8        | 1.333445 |
| A_68_P03533898 | Nbl1          | 1.333352 |
| A_68_P12809678 | Tmem50b       | 1.333178 |
| A_68_P10902235 | Pitx1         | 1.333066 |
| A_68_P04731732 | Sdsl          | 1.332863 |
| A_68_P02825852 | Cd1d1         | 1.332847 |
| A_68_P04275151 | Arpc1b        | 1.332839 |
| A_68_P04844132 | Cxcl4         | 1.33282  |
| A_68_P09880659 | Acot1         | 1.33255  |
| A_68_P14042310 | Pcdhga8       | 1.332507 |
| A_68_P07815979 | Gk5           | 1.332291 |
| A_68_P12751159 | B830017H08Rik | 1.33221  |
| A_68_P01670540 | Rpl35         | 1.332147 |
| A_68_P04451113 | Slc5a1        | 1.331686 |

|                |               |          |
|----------------|---------------|----------|
| A_68_P10105119 | Acot5         | 1.331665 |
| A_68_P03412051 | 1700018C11Rik | 1.331334 |
| A_68_P07278572 | Spfh2         | 1.331234 |
| A_68_P04597777 | Corin         | 1.331151 |
| A_68_P09378071 | Pfn1          | 1.331113 |
| A_68_P07540560 | Aldh1a2       | 1.331025 |
| A_68_P06373812 | Ucp2          | 1.330931 |
| A_68_P07561548 | Clk3          | 1.33083  |
| A_68_P06653589 | Plekha4       | 1.330529 |
| A_68_P01299923 | Hoxd3         | 1.330252 |
| A_68_P02576267 | Gnb4          | 1.330108 |
| A_68_P09190672 | Nr1d1         | 1.330101 |
| A_68_P08649165 | Stk11         | 1.330069 |

**Supplementary Table 1c: N vs KO 574 hypomethylation genes on d100**

| Probe Name     | Gene Name     | Methylation difference value |
|----------------|---------------|------------------------------|
| A_68_P01158774 | Rpp38         | 0.117586                     |
| A_68_P04306467 | Whsc2         | 0.44667                      |
| A_68_P04768574 | Nkx6-1        | 0.450274                     |
| A_68_P04768574 | Nkx6-1        | 0.456722                     |
| A_68_P11079538 | Sirt5         | 0.469916                     |
| A_68_P05715101 | Xpc           | 0.47726                      |
| A_68_P09018865 | Cbx4          | 0.48022                      |
| A_68_P02314772 | Mtx1-Thbs3    | 0.48654                      |
| A_68_P06626588 | 6430526N21Rik | 0.505216                     |
| A_68_P08138715 | Mcam          | 0.512579                     |
| A_68_P01143715 | Bai3          | 0.520126                     |
| A_68_P14431113 | Mxi1          | 0.521987                     |
| A_68_P03651216 | Acot11        | 0.526222                     |
| A_68_P04365059 | Klb           | 0.534576                     |
| A_68_P07679434 | Atp1b3        | 0.535726                     |
| A_68_P05540049 | Erc1          | 0.538101                     |
| A_68_P03883271 | Scp2          | 0.544018                     |
| A_68_P11132389 | Gnl3          | 0.550753                     |
| A_68_P06643826 | Gpr4          | 0.554059                     |
| A_68_P09805220 | Trib2         | 0.554567                     |
| A_68_P10745919 | Ipo11         | 0.55673                      |
| A_68_P14628736 | 6430550H21Rik | 0.556792                     |
| A_68_P13302036 | Six2          | 0.55781                      |
| A_68_P07912195 | Yap1          | 0.55967                      |
| A_68_P02367976 | Isg2012       | 0.561072                     |
| A_68_P13730781 | Sema6a        | 0.56479                      |
| A_68_P02919830 | Lrrn6d        | 0.568718                     |
| A_68_P12871003 | Sema5b        | 0.577088                     |
| A_68_P06843515 | 2810428I15Rik | 0.578968                     |
| A_68_P06955360 | Ank1          | 0.578969                     |
| A_68_P10309940 | Gsc           | 0.581853                     |
| A_68_P01134685 | Col19a1       | 0.583897                     |
| A_68_P05939018 | A630091E08Rik | 0.585316                     |

|                |               |          |
|----------------|---------------|----------|
| A_68_P07923222 | AI593442      | 0.586695 |
| A_68_P08005788 | Odf3l1        | 0.589204 |
| A_68_P14157373 | Sorcs1        | 0.589494 |
| A_68_P05596974 | Rnf103        | 0.590833 |
| A_68_P01737808 | Srp14         | 0.600586 |
| A_68_P14240187 | Sart1         | 0.601667 |
| A_68_P08777976 | A530089I17Rik | 0.602493 |
| A_68_P11820556 | Tmem110       | 0.603203 |
| A_68_P04028116 | Cldn19        | 0.604347 |
| A_68_P11922964 | Klf10         | 0.605503 |
| A_68_P05500620 | Stk31         | 0.60648  |
| A_68_P10176316 | Zbtb25        | 0.61219  |
| A_68_P04104973 | Tpte2         | 0.612323 |
| A_68_P00708979 | Pax3          | 0.612669 |
| A_68_P04742115 | Pkd2          | 0.613064 |
| A_68_P02865901 | Mef2d         | 0.615885 |
| A_68_P07107737 | Gse1          | 0.616863 |
| A_68_P10692125 | Mtap1b        | 0.616997 |
| A_68_P06699548 | Pou4f2        | 0.622794 |
| A_68_P01482084 | Idh3b-Ebf4    | 0.624479 |
| A_68_P11770812 | Nefm          | 0.625311 |
| A_68_P12189296 | Letmd1        | 0.625624 |
| A_68_P10411237 | Atxn7l4       | 0.626317 |
| A_68_P10375909 | Six6os1       | 0.626728 |
| A_68_P09966298 | 1810011O16Rik | 0.626949 |
| A_68_P06843937 | Hydin         | 0.628241 |
| A_68_P03226190 | Pla2g2e       | 0.630122 |
| A_68_P08913495 | Hmha1         | 0.631253 |
| A_68_P06984570 | Psmc7         | 0.631504 |
| A_68_P04104973 | Tpte2         | 0.631847 |
| A_68_P02709474 | Foxo1         | 0.632642 |
| A_68_P01413716 | D430039N05Rik | 0.635353 |
| A_68_P11738050 | Homez         | 0.639324 |
| A_68_P08104050 | Pcsk7         | 0.640161 |
| A_68_P11559162 | Nid2          | 0.642847 |

|                |                      |          |
|----------------|----------------------|----------|
| A_68_P12432050 | Galnt6               | 0.643854 |
| A_68_P07078935 | Atbf1                | 0.644039 |
| A_68_P09378399 | Ppp1r1b              | 0.645095 |
| A_68_P11019872 | Ptch1                | 0.645149 |
| A_68_P03226190 | Pla2g2e              | 0.646786 |
| A_68_P08777819 | Nfic                 | 0.647609 |
| A_68_P13317398 | Arhgdig              | 0.648079 |
| A_68_P14075007 | 2810433K01Rik        | 0.651669 |
| A_68_P09693315 | 2010305C02Rik        | 0.65459  |
| A_68_P03139948 | Zbtb7b               | 0.6547   |
| A_68_P06327058 | Slc28a1              | 0.655497 |
| A_68_P05552653 | Gabarapl1            | 0.655712 |
| A_68_P10113786 | Bcl11b               | 0.655849 |
| A_68_P11799087 | Lgals3               | 0.656278 |
| A_68_P04834752 | Cutl1                | 0.65636  |
| A_68_P07640747 | Fxyd6                | 0.657501 |
| A_68_P13232871 | Itfg3-Luc7l          | 0.657704 |
| A_68_P05905001 | Ccnd1                | 0.658338 |
| A_68_P09782980 | Kcnfl                | 0.658418 |
| A_68_P11108606 | Ripk1                | 0.658581 |
| A_68_P13439820 | Ptpns                | 0.65903  |
| A_68_P01431419 | Tcfap2c              | 0.659031 |
| A_68_P01134681 | Col19a1              | 0.660059 |
| A_68_P06922018 | Lrrc25               | 0.662443 |
| A_68_P04137135 | Smurf1               | 0.663187 |
| A_68_P06668394 | Igf2                 | 0.664825 |
| A_68_P06631626 | Wtip                 | 0.66487  |
| A_68_P11404297 | Selk                 | 0.666577 |
| A_68_P04661116 | Sema3c               | 0.667061 |
| A_68_P05301787 | LOC380687            | 0.667457 |
| A_68_P09195114 | A830031A19Rik-Bcl11a | 0.667459 |
| A_68_P03184759 | Gucyla3              | 0.668029 |
| A_68_P15095336 | Hdac8                | 0.669755 |
| A_68_P05088298 | Hipk2                | 0.669892 |
| A_68_P09732738 | 1500005I02Rik        | 0.67009  |

|                |               |          |
|----------------|---------------|----------|
| A_68_P09498627 | Mink1         | 0.670587 |
| A_68_P12129669 | Csad          | 0.670684 |
| A_68_P06293636 | Luzp2         | 0.670984 |
| A_68_P08666230 | Hnrph3        | 0.671512 |
| A_68_P08504576 | Cfd           | 0.672942 |
| A_68_P03807576 | Wdtd1         | 0.672964 |
| A_68_P03495355 | Mib2          | 0.673332 |
| A_68_P04519541 | Gfi1          | 0.673533 |
| A_68_P05565689 | Ptms          | 0.674708 |
| A_68_P04178083 | Phox2b        | 0.676166 |
| A_68_P11486688 | Lect1         | 0.676721 |
| A_68_P06358071 | Jmjd5         | 0.677043 |
| A_68_P12254359 | C730034F03Rik | 0.677381 |
| A_68_P06205022 | Lhb           | 0.677382 |
| A_68_P10787030 | Nr2f1         | 0.678045 |
| A_68_P11173846 | Fgf17         | 0.678116 |
| A_68_P07518868 | Chrna5        | 0.678525 |
| A_68_P09122772 | Accn1         | 0.678624 |
| A_68_P04519541 | Gfi1          | 0.678924 |
| A_68_P01804429 | Pxmp4-Zfp341  | 0.678979 |
| A_68_P04629065 | Gfi1          | 0.679573 |
| A_68_P12511902 | Sim2          | 0.679789 |
| A_68_P13620460 | LOC639653     | 0.679809 |
| A_68_P01875370 | Kcnb1         | 0.680068 |
| A_68_P09880778 | Rps7          | 0.680826 |
| A_68_P13786129 | Zfp521        | 0.681316 |
| A_68_P15206339 | Sox3          | 0.681804 |
| A_68_P02205842 | Rya3          | 0.682398 |
| A_68_P04216765 | Hip1          | 0.682562 |
| A_68_P01733029 | Rassf2        | 0.683103 |
| A_68_P13319154 | 9530058B02Rik | 0.683382 |
| A_68_P00719131 | Lad1          | 0.683445 |
| A_68_P05039877 | Ccnd2         | 0.683838 |
| A_68_P03786862 | Tmem64        | 0.684374 |
| A_68_P11936126 | Josd1-Gtpbp1  | 0.684594 |

|                |                             |          |
|----------------|-----------------------------|----------|
| A_68_P02165297 | Cpxm1-4933425O20Rik         | 0.684787 |
| A_68_P06476351 | Bcam                        | 0.685215 |
| A_68_P10132985 | Id2                         | 0.685735 |
| A_68_P06075223 | Aplp1                       | 0.686026 |
| A_68_P02046877 | Egfl7                       | 0.686442 |
| A_68_P04107140 | Dnajb6                      | 0.687186 |
| A_68_P04949699 | Otof-1700001C02Rik          | 0.687455 |
| A_68_P01831728 | Ddx31                       | 0.68769  |
| A_68_P04935832 | Affl1                       | 0.688011 |
| A_68_P01147199 | Lmod1                       | 0.688223 |
| A_68_P01624279 | A430105I19Rik-1810007E14Rik | 0.688864 |
| A_68_P05448318 | Kcna5                       | 0.68927  |
| A_68_P14336883 | AU041783                    | 0.689526 |
| A_68_P13555549 | Ppm1b                       | 0.689595 |
| A_68_P08112343 | C230081A13Rik-Hmg20a        | 0.690693 |
| A_68_P13789140 | Arhgap12                    | 0.69101  |
| A_68_P05969338 | Htra1                       | 0.691246 |
| A_68_P02060987 | Defb25-Rem1                 | 0.691256 |
| A_68_P02681301 | Lhx8                        | 0.692064 |
| A_68_P13976384 | Csnk1a1                     | 0.69207  |
| A_68_P11912864 | Krt8                        | 0.692364 |
| A_68_P08990544 | Cnot8                       | 0.692458 |
| A_68_P14314284 | Trim8                       | 0.692729 |
| A_68_P07882801 | Cplx3                       | 0.692778 |
| A_68_P00234397 | Enah                        | 0.692884 |
| A_68_P03926726 | Acot11                      | 0.693338 |
| A_68_P07453625 | Ky                          | 0.693542 |
| A_68_P06387117 | Hdgfrp3                     | 0.693637 |
| A_68_P02560192 | Efna1                       | 0.693787 |
| A_68_P01294402 | Tlk1                        | 0.693973 |
| A_68_P06739082 | 2310022B05Rik               | 0.694111 |
| A_68_P13303514 | Zfp101                      | 0.694683 |
| A_68_P02489623 | Ankrd34                     | 0.694873 |
| A_68_P11433919 | Tpt1                        | 0.695004 |
| A_68_P11927843 | Prlr                        | 0.695392 |



|                |                       |          |
|----------------|-----------------------|----------|
| A_68_P09466672 | Atp5g1                | 0.695604 |
| A_68_P06237422 | Msx3                  | 0.695632 |
| A_68_P04126741 | AA407659              | 0.696251 |
| A_68_P04730667 | Ddx55                 | 0.696903 |
| A_68_P00271539 | Accn4                 | 0.697042 |
| A_68_P10325481 | Mycn                  | 0.69712  |
| A_68_P04262240 | Mapk10                | 0.697561 |
| A_68_P14260104 | Spnb3                 | 0.698115 |
| A_68_P06373804 | Ucp2                  | 0.698182 |
| A_68_P12204339 | Panx2                 | 0.69846  |
| A_68_P07355188 | Cdh11                 | 0.698509 |
| A_68_P08435891 | Edg6                  | 0.699009 |
| A_68_P15144551 | Sat1                  | 0.699452 |
| A_68_P09535003 | B4galnt2              | 0.700355 |
| A_68_P13398221 | Tnrc5                 | 0.700688 |
| A_68_P03863568 | Il11ra1               | 0.700935 |
| A_68_P15022938 | Irak1                 | 0.701275 |
| A_68_P03668203 | Slc44a1               | 0.701482 |
| A_68_P07304552 | BC048644              | 0.701887 |
| A_68_P08840096 | Lrig3                 | 0.701897 |
| A_68_P07602168 | Crabp1                | 0.701967 |
| A_68_P06410543 | Mesp1                 | 0.702275 |
| A_68_P13570124 | 1700106N22Rik         | 0.702611 |
| A_68_P14242816 | Sorbs1                | 0.702781 |
| A_68_P13090914 | Telo2                 | 0.70373  |
| A_68_P06208597 | 2900093B09Rik         | 0.703745 |
| A_68_P04522816 | Pdx1                  | 0.703949 |
| A_68_P10018570 | Ap4s1                 | 0.704897 |
| A_68_P11319776 | Stk24                 | 0.704949 |
| A_68_P00708991 | Pax3                  | 0.705136 |
| A_68_P07428129 | Irx3                  | 0.705412 |
| A_68_P06515895 | Klk7                  | 0.705658 |
| A_68_P07142897 | Taf1c                 | 0.705989 |
| A_68_P08773789 | 1110012D08Rik-Dnajc14 | 0.706013 |
| A_68_P06922348 | Insl3                 | 0.706748 |

|                |                    |          |
|----------------|--------------------|----------|
| A_68_P13403566 | Cend3              | 0.70681  |
| A_68_P05217166 | Ephb6              | 0.706857 |
| A_68_P01797463 | A530013C23Rik      | 0.707271 |
| A_68_P01725854 | Ctsa               | 0.707914 |
| A_68_P12694774 | Olig2              | 0.708003 |
| A_68_P06756488 | Zmat4              | 0.708105 |
| A_68_P13463798 | Zbtb22             | 0.708449 |
| A_68_P07897281 | Rdx                | 0.708498 |
| A_68_P12725023 | Ap2m1              | 0.708837 |
| A_68_P09608031 | Egfr               | 0.709227 |
| A_68_P04949699 | Otof-1700001C02Rik | 0.709397 |
| A_68_P13215738 | Mrps18b            | 0.709609 |
| A_68_P04808481 | Ephb4              | 0.709773 |
| A_68_P07809706 | Rbms3              | 0.710201 |
| A_68_P09536836 | Pnmt               | 0.710279 |
| A_68_P03087438 | Pklr               | 0.710372 |
| A_68_P10243773 | Bcl11b             | 0.710504 |
| A_68_P14224733 | Map4k2             | 0.710717 |
| A_68_P02095165 | A930034L06Rik      | 0.71119  |
| A_68_P12098370 | Plec1              | 0.711219 |
| A_68_P10800279 | Pols               | 0.711318 |
| A_68_P13453584 | Prkce              | 0.711453 |
| A_68_P00484490 | Igfbp5             | 0.71166  |
| A_68_P10400455 | Calm1              | 0.711838 |
| A_68_P08527794 | Psap               | 0.712247 |
| A_68_P00961427 | Tada1l             | 0.712351 |
| A_68_P11292465 | Nfatc4             | 0.712508 |
| A_68_P09846917 | Rhob               | 0.712696 |
| A_68_P06630253 | Shkbp1             | 0.712726 |
| A_68_P04696354 | Iqce-AA881470      | 0.712747 |
| A_68_P13158664 | 1300003B13Rik      | 0.713376 |
| A_68_P14426150 | Lzts2              | 0.713412 |
| A_68_P13678065 | Nfatc1             | 0.713504 |
| A_68_P06826869 | Pcm1               | 0.713608 |
| A_68_P01687732 | Gatm               | 0.713882 |

|                |                            |          |
|----------------|----------------------------|----------|
| A_68_P00932178 | Epha4                      | 0.713892 |
| A_68_P03738288 | Serinc2                    | 0.713937 |
| A_68_P04475202 | Caln1                      | 0.713952 |
| A_68_P06550934 | Lrrc4b                     | 0.714051 |
| A_68_P10114516 | BC048191:656               | 0.714552 |
| A_68_P08513384 | Slc35d3                    | 0.714612 |
| A_68_P01381082 | Myt1                       | 0.715598 |
| A_68_P14228699 | Eef1g                      | 0.715616 |
| A_68_P06506665 | Apoe                       | 0.715624 |
| A_68_P10626473 | BC003212:-702              | 0.715632 |
| A_68_P09162950 | Tmc6                       | 0.716272 |
| A_68_P01886185 | Stmn3                      | 0.716399 |
| A_68_P01254928 | Ntng2                      | 0.71654  |
| A_68_P13240096 | Rpl7l1                     | 0.716827 |
| A_68_P10928545 | Gcnt2                      | 0.716852 |
| A_68_P13651831 | Sil1                       | 0.717036 |
| A_68_P03345996 | Cdkn2a                     | 0.7171   |
| A_68_P13131084 | Cd2ap                      | 0.717138 |
| A_68_P14301707 | Rcor2                      | 0.717149 |
| A_68_P06506007 | Gys1                       | 0.717228 |
| A_68_P00702326 | ENSMUST00000083599.1:-2617 | 0.717343 |
| A_68_P06515293 | Opa3                       | 0.717569 |
| A_68_P07295590 | 5830457O10Rik              | 0.717591 |
| A_68_P12730511 | Senp5                      | 0.717678 |
| A_68_P12052833 | AW549877                   | 0.717799 |
| A_68_P06948296 | Dctn6                      | 0.717894 |
| A_68_P11280485 | Jph4                       | 0.717962 |
| A_68_P13917502 | Ccdc100                    | 0.718234 |
| A_68_P12963407 | Igsf4d                     | 0.718612 |
| A_68_P03926726 | Acot11                     | 0.719132 |
| A_68_P03581099 | 5430416O09Rik              | 0.719254 |
| A_68_P09350088 | Pmp22                      | 0.719328 |
| A_68_P04926196 | Fzd10                      | 0.719438 |
| A_68_P00400062 | Kif1a                      | 0.71952  |
| A_68_P04967489 | Med28                      | 0.719628 |

|                |                            |          |
|----------------|----------------------------|----------|
| A_68_P02835248 | Celsr2                     | 0.719747 |
| A_68_P02622581 | Chrn2                      | 0.719778 |
| A_68_P08575022 | Col13a1                    | 0.719844 |
| A_68_P02899649 | Adamtsl4                   | 0.720331 |
| A_68_P01515364 | ENSMUST00000083577.1:-5512 | 0.720383 |
| A_68_P07570037 | Kirrel3                    | 0.720504 |
| A_68_P14495624 | Nkx2-3                     | 0.721408 |
| A_68_P14218567 | Aldh18a1                   | 0.721656 |
| A_68_P07912188 | Yap1                       | 0.72185  |
| A_68_P01782726 | Evx2-Hoxd13                | 0.721966 |
| A_68_P11569601 | Ebf2                       | 0.722002 |
| A_68_P06685279 | Gpr124                     | 0.722235 |
| A_68_P01966322 | C430004E15Rik              | 0.722636 |
| A_68_P07646992 | Als2cl                     | 0.722738 |
| A_68_P07228622 | Cotl1                      | 0.722757 |
| A_68_P10408377 | Actr10                     | 0.723072 |
| A_68_P10949115 | Fst                        | 0.723107 |
| A_68_P06764028 | Spg7                       | 0.723217 |
| A_68_P09370370 | Cbx8                       | 0.723395 |
| A_68_P09455667 | Clk4                       | 0.723549 |
| A_68_P14425233 | Ldb1                       | 0.723554 |
| A_68_P05840537 | Tra2a                      | 0.723616 |
| A_68_P10021274 | Fos                        | 0.723796 |
| A_68_P04606333 | A930017N06Rik              | 0.723866 |
| A_68_P06958349 | Wrn                        | 0.724148 |
| A_68_P09015003 | A230051G13Rik              | 0.724167 |
| A_68_P06412434 | Bnc1                       | 0.724338 |
| A_68_P09703855 | Epn3                       | 0.72453  |
| A_68_P12129893 | Cdc42ep1                   | 0.724796 |
| A_68_P07935467 | Bsn                        | 0.724924 |
| A_68_P00536905 | Btg2                       | 0.725066 |
| A_68_P09861753 | Degs2                      | 0.725268 |
| A_68_P08033503 | BC018242                   | 0.725339 |
| A_68_P04199774 | Kctd10                     | 0.72534  |
| A_68_P04114789 | Add1                       | 0.725696 |

|                |               |          |
|----------------|---------------|----------|
| A_68_P13256078 | Tbc1d22b      | 0.725803 |
| A_68_P11576401 | Wnt5a         | 0.725829 |
| A_68_P06274233 | Gdpd5         | 0.725896 |
| A_68_P13431017 | 4930546H06Rik | 0.726111 |
| A_68_P07561476 | 2310005P05Rik | 0.726183 |
| A_68_P12730433 | Igf2bp2       | 0.726511 |
| A_68_P13267090 | Hsp90ab1      | 0.726632 |
| A_68_P09642978 | Stx8          | 0.726649 |
| A_68_P05822242 | 9630033F20Rik | 0.726654 |
| A_68_P08525614 | Phlda1        | 0.72719  |
| A_68_P05127678 | Epha1         | 0.727376 |
| A_68_P05985938 | Rgs10         | 0.727446 |
| A_68_P10642062 | Lrrc16        | 0.727983 |
| A_68_P02037117 | Itga8         | 0.728134 |
| A_68_P09723695 | BC018371      | 0.728156 |
| A_68_P01427925 | Gata3         | 0.728227 |
| A_68_P12310778 | Krt18         | 0.72827  |
| A_68_P14693838 | Pcyt1b        | 0.728336 |
| A_68_P08200511 | Hmga2         | 0.728405 |
| A_68_P04263889 | Emilin1       | 0.728439 |
| A_68_P05906531 | 2010208K18Rik | 0.728507 |
| A_68_P08288180 | Tmtc2         | 0.728552 |
| A_68_P01275047 | Cdh22         | 0.728638 |
| A_68_P07860043 | Bace1         | 0.728797 |
| A_68_P07231075 | Tomm20        | 0.728863 |
| A_68_P10480061 | Foxf2         | 0.728968 |
| A_68_P09415895 | D11Bwg0434e   | 0.729111 |
| A_68_P06098566 | Rabac1        | 0.729684 |
| A_68_P09306619 | Metrl         | 0.729713 |
| A_68_P05461859 | Hoxa9         | 0.729962 |
| A_68_P09457623 | Ddc8          | 0.730038 |
| A_68_P13186454 | Kcnk12        | 0.730298 |
| A_68_P11227662 | Cab39l        | 0.730309 |
| A_68_P07646962 | Als2cl        | 0.730384 |
| A_68_P05823725 | Slc6a6        | 0.730605 |

|                |                            |          |
|----------------|----------------------------|----------|
| A_68_P06437968 | Pnkp                       | 0.730685 |
| A_68_P11625862 | Kcnma1                     | 0.7307   |
| A_68_P02754662 | Mab2112                    | 0.730731 |
| A_68_P01019049 | Paqr8                      | 0.73084  |
| A_68_P03801846 | Phf13                      | 0.730934 |
| A_68_P09906095 | Frmd6                      | 0.730935 |
| A_68_P07862583 | Calml4                     | 0.731087 |
| A_68_P06000741 | Adck4                      | 0.731108 |
| A_68_P04264000 | Mtif3                      | 0.731196 |
| A_68_P11068610 | Ccdc127                    | 0.731234 |
| A_68_P01605724 | Egfl7                      | 0.731243 |
| A_68_P13250291 | Srrm2                      | 0.731286 |
| A_68_P14763789 | Esx1                       | 0.731302 |
| A_68_P08133364 | E330016A19Rik              | 0.731448 |
| A_68_P09421796 | Nog                        | 0.731484 |
| A_68_P11829712 | Gjb2                       | 0.731818 |
| A_68_P06580232 | Etfb                       | 0.731825 |
| A_68_P10757654 | ENSMUST00000083641.1:-5603 | 0.73213  |
| A_68_P04266446 | Dok7                       | 0.732252 |
| A_68_P08159927 | Nope                       | 0.732276 |
| A_68_P13753104 | Proc                       | 0.732658 |
| A_68_P07663357 | Megf11                     | 0.732672 |
| A_68_P04329254 | Cdk2ap1                    | 0.732682 |
| A_68_P03214010 | Eno1                       | 0.732725 |
| A_68_P07578383 | Pknox2                     | 0.73296  |
| A_68_P14218841 | Nrxn2                      | 0.732987 |
| A_68_P14809906 | Ldoc1                      | 0.733005 |
| A_68_P14938222 | Cited1                     | 0.733277 |
| A_68_P05933183 | 6330512M04Rik              | 0.733293 |
| A_68_P03632444 | 2810405K02Rik              | 0.733335 |
| A_68_P04359736 | Epha5                      | 0.733712 |
| A_68_P04032944 | Wasf2                      | 0.733713 |
| A_68_P03938697 | Spen-B330016D10Rik         | 0.733786 |
| A_68_P12766510 | Hmgn1                      | 0.733819 |
| A_68_P10222137 | Coch                       | 0.733984 |

|                |                    |          |
|----------------|--------------------|----------|
| A_68_P00310817 | Klf7               | 0.734238 |
| A_68_P02567272 | Ptbp2              | 0.734407 |
| A_68_P08612220 | Lrp1               | 0.734423 |
| A_68_P00556271 | Ctdsp1             | 0.734455 |
| A_68_P01139487 | Wnt6               | 0.73457  |
| A_68_P01081579 | Nmnat2             | 0.734572 |
| A_68_P05313100 | A_68_P05313100     | 0.734574 |
| A_68_P02071843 | Ifih1              | 0.734603 |
| A_68_P04671528 | Slc10a4            | 0.734638 |
| A_68_P09467824 | OTTMUSG00000003802 | 0.734834 |
| A_68_P03167353 | Ift80-Smc4         | 0.734841 |
| A_68_P07836186 | Yipf2              | 0.735095 |
| A_68_P00029318 | Irs1               | 0.735273 |
| A_68_P03385664 | Btf3l4-Txndc12     | 0.735303 |
| A_68_P05287542 | A_68_P05287542     | 0.735512 |
| A_68_P07323106 | Hapln4             | 0.735662 |
| A_68_P02612525 | Hdgf               | 0.735723 |
| A_68_P13331861 | Tgif               | 0.735743 |
| A_68_P01021262 | Fmn2               | 0.735776 |
| A_68_P13074929 | Psmb8              | 0.735827 |
| A_68_P09345179 | BB220380           | 0.735948 |
| A_68_P05547796 | Lrrc23             | 0.736307 |
| A_68_P07842392 | Paqr5              | 0.736478 |
| A_68_P12599259 | Etv5               | 0.736701 |
| A_68_P00289278 | Usp21              | 0.736871 |
| A_68_P02294728 | Lef1               | 0.736978 |
| A_68_P12368109 | Eppk1              | 0.737154 |
| A_68_P01190215 | Orc4l              | 0.73737  |
| A_68_P11843718 | Cbx6               | 0.737411 |
| A_68_P08676565 | 9030224M15Rik      | 0.737513 |
| A_68_P07467098 | Cbl                | 0.737528 |
| A_68_P09049316 | Mrpl45             | 0.737562 |
| A_68_P03127711 | Sox2               | 0.737656 |
| A_68_P04475206 | Caln1              | 0.737808 |
| A_68_P02349175 | Dcamk1l            | 0.737811 |

|                |                      |          |
|----------------|----------------------|----------|
| A_68_P01887600 | Shc4                 | 0.737862 |
| A_68_P11915779 | Foxred2              | 0.737915 |
| A_68_P11564468 | 9430077A04Rik-Prrxl1 | 0.738024 |
| A_68_P12476467 | Pigp                 | 0.738032 |
| A_68_P01767792 | Tshz2                | 0.738188 |
| A_68_P06895632 | Ces1                 | 0.738199 |
| A_68_P02243584 | Agpat7               | 0.738371 |
| A_68_P09691900 | Unc119               | 0.738813 |
| A_68_P06736693 | Csmd1                | 0.738884 |
| A_68_P09697830 | Sec14l4              | 0.73889  |
| A_68_P02531278 | Muc1                 | 0.738954 |
| A_68_P04182410 | 2810006K23Rik        | 0.739007 |
| A_68_P08223563 | Sbno2                | 0.73914  |
| A_68_P07820492 | Gsta2                | 0.739193 |
| A_68_P04904123 | Pdgfa                | 0.739559 |
| A_68_P09021937 | Rtn4                 | 0.739617 |
| A_68_P14505402 | Asrgl1               | 0.73971  |
| A_68_P05328185 | Chd4                 | 0.739797 |
| A_68_P09853995 | Tmem121              | 0.739967 |
| A_68_P12835494 | Smpd4                | 0.740147 |
| A_68_P04730667 | Ddx55                | 0.740272 |
| A_68_P00344176 | Sox17                | 0.740281 |
| A_68_P12185368 | Baspl                | 0.740289 |
| A_68_P14935324 | EG331392             | 0.740425 |
| A_68_P05419197 | Usp5-Cdca3           | 0.740584 |
| A_68_P09683594 | Cdc42ep4             | 0.740598 |
| A_68_P13594311 | Lipg                 | 0.74084  |
| A_68_P14444515 | Lrfn4                | 0.740894 |
| A_68_P08446316 | Timp3                | 0.741042 |
| A_68_P01421703 | Tgif2                | 0.741047 |
| A_68_P13916985 | Gm672                | 0.741355 |
| A_68_P07392546 | C330011M18Rik        | 0.741362 |
| A_68_P14344143 | Wnt8b                | 0.741376 |
| A_68_P07839049 | Onecut1              | 0.741434 |
| A_68_P01470919 | Gm691                | 0.741559 |



|                |                |          |
|----------------|----------------|----------|
| A_68_P09233273 | Acadvl-Dlgh4   | 0.741567 |
| A_68_P00202781 | Dars2          | 0.741642 |
| A_68_P04245232 | Kcnh2          | 0.741816 |
| A_68_P05308590 | Cav1           | 0.74192  |
| A_68_P06193351 | Dmpk           | 0.741963 |
| A_68_P04886874 | Fzd1           | 0.741973 |
| A_68_P04233932 | Cnot6l         | 0.742018 |
| A_68_P10675635 | Tmem174        | 0.74208  |
| A_68_P04903904 | BC019731       | 0.742136 |
| A_68_P04070290 | Dhcr24         | 0.742143 |
| A_68_P07313708 | Csmd1          | 0.742166 |
| A_68_P06728417 | Cyld           | 0.742198 |
| A_68_P00694738 | Aff3           | 0.742201 |
| A_68_P09209213 | Ubtf           | 0.742228 |
| A_68_P06654006 | Ifitm2         | 0.742233 |
| A_68_P05954805 | Tmem160        | 0.742255 |
| A_68_P14501274 | Syvn1          | 0.742268 |
| A_68_P09638188 | Rad51l3        | 0.742278 |
| A_68_P10809479 | Ndufs4         | 0.742407 |
| A_68_P09176378 | 1810073N04Rik  | 0.742606 |
| A_68_P10088239 | Pum2           | 0.742624 |
| A_68_P03612259 | Dnajc8         | 0.742654 |
| A_68_P10456926 | Hist1h1b       | 0.742853 |
| A_68_P14324730 | Cpt1a          | 0.742853 |
| A_68_P07596637 | Vsig2          | 0.743085 |
| A_68_P03952273 | Gpr3-Cd164l2   | 0.743138 |
| A_68_P08951831 | Cct2           | 0.743156 |
| A_68_P09143801 | Pps            | 0.743194 |
| A_68_P12277588 | Hoxc9          | 0.743237 |
| A_68_P02451509 | 2010016I18Rik  | 0.743456 |
| A_68_P02653832 | BC028528-Aph1a | 0.743739 |
| A_68_P08253385 | ORF61-Cnn2     | 0.743837 |
| A_68_P07433896 | Ptger1         | 0.743898 |
| A_68_P13070859 | S3-12          | 0.744065 |
| A_68_P04414063 | Cdx2           | 0.744135 |

|                |               |          |
|----------------|---------------|----------|
| A_68_P06463897 | Foxa3         | 0.744137 |
| A_68_P01503212 | Gm691         | 0.744166 |
| A_68_P04793013 | 2700038N03Rik | 0.744214 |
| A_68_P08122742 | Smad3         | 0.744219 |
| A_68_P04178083 | Phox2b        | 0.744279 |
| A_68_P12332349 | C1qtnf6       | 0.744305 |
| A_68_P12092825 | Sstr3         | 0.744308 |
| A_68_P01120361 | Igsf8         | 0.744486 |
| A_68_P11766248 | Cadps         | 0.744537 |
| A_68_P14418019 | Eef1g         | 0.744649 |
| A_68_P08221853 | Slc1a6        | 0.744795 |
| A_68_P06261649 | Lrrk1         | 0.744864 |
| A_68_P07411833 | Mmp15         | 0.744877 |
| A_68_P03164989 | Alx3          | 0.744943 |
| A_68_P13522497 | Foxp4         | 0.744954 |
| A_68_P07398504 | Sfrp1         | 0.745021 |
| A_68_P13205279 | Cyp1b1        | 0.745085 |
| A_68_P04159074 | 3110082I17Rik | 0.745143 |
| A_68_P09050152 | Ace           | 0.745194 |
| A_68_P11213391 | Kctd6         | 0.745237 |
| A_68_P06201940 | Usp47         | 0.745579 |
| A_68_P13117095 | Bak1          | 0.745621 |
| A_68_P02040073 | Tcp1l1l       | 0.746083 |
| A_68_P04802046 | Drd5          | 0.74617  |
| A_68_P10852234 | Tcfap2a       | 0.746173 |
| A_68_P12397525 | Top1mt        | 0.746175 |
| A_68_P03832008 | Pax5          | 0.746237 |
| A_68_P08285737 | Frs2          | 0.74626  |
| A_68_P05936540 | Atp1a3        | 0.746262 |
| A_68_P06280706 | Tmem126a      | 0.746266 |
| A_68_P03506024 | Sdc3          | 0.746499 |
| A_68_P09611840 | Tbx2          | 0.746576 |
| A_68_P04337955 | Rnf4          | 0.746695 |
| A_68_P09036672 | Plekhh3       | 0.746831 |
| A_68_P08295564 | 4930404N11Rik | 0.746885 |

|                |                     |          |
|----------------|---------------------|----------|
| A_68_P08756474 | Dyrk2               | 0.746929 |
| A_68_P06099522 | Apoc1               | 0.747018 |
| A_68_P07138762 | Znrf1               | 0.747312 |
| A_68_P09842319 | Adssl1              | 0.747433 |
| A_68_P07915233 | Trip4               | 0.747483 |
| A_68_P03801846 | Phf13               | 0.747541 |
| A_68_P09804391 | Siva1               | 0.747647 |
| A_68_P13125889 | Akap8               | 0.747744 |
| A_68_P02870026 | 2310007A19Rik-Tnrc4 | 0.74791  |
| A_68_P08634266 | Sf3a2               | 0.74793  |
| A_68_P04205923 | Spink2              | 0.747965 |
| A_68_P05289468 | Bcat1               | 0.748068 |
| A_68_P10960928 | Cd83                | 0.748074 |
| A_68_P03954981 | Eno1                | 0.748094 |
| A_68_P08112656 | Pafah1b2            | 0.748115 |
| A_68_P13076456 | Smoc2               | 0.748152 |
| A_68_P08689401 | Gpr6                | 0.748254 |
| A_68_P09146494 | Cnot6               | 0.74843  |
| A_68_P09882292 | Jundm2              | 0.748603 |
| A_68_P01669852 | Fpgs                | 0.748647 |
| A_68_P08949156 | Rassf3              | 0.748698 |
| A_68_P14336503 | Arhgap19            | 0.748776 |
| A_68_P03984671 | Lrp8                | 0.748798 |
| A_68_P11454291 | Dpysl2              | 0.748831 |
| A_68_P03859452 | Slc31a1             | 0.748991 |
| A_68_P07587140 | Thy1                | 0.749044 |
| A_68_P02399008 | 4933421E11Rik       | 0.749187 |
| A_68_P11623670 | Gata4               | 0.749408 |
| A_68_P03223989 | Epha10              | 0.749467 |
| A_68_P06771759 | Snapc2              | 0.74955  |
| A_68_P14270093 | D030056L22Rik       | 0.749799 |
| A_68_P07504222 | Stt3b               | 0.749927 |
| A_68_P10045379 | Nfkbia              | 0.750031 |
| A_68_P05906990 | Snx26               | 0.750251 |
| A_68_P08303985 | Olig3               | 0.750339 |

|                |            |          |
|----------------|------------|----------|
| A_68_P12225777 | Tnfrsf13c  | 0.750418 |
| A_68_P13139253 | Rxrb       | 0.750468 |
| A_68_P07335325 | Fhod1      | 0.750607 |
| A_68_P12081602 | Rbm9       | 0.750625 |
| A_68_P10262250 | Cyp46a1    | 0.750654 |
| A_68_P08668997 | Snrpd3     | 0.750895 |
| A_68_P08306365 | Gli1       | 0.750942 |
| A_68_P04533661 | Rhof       | 0.750957 |
| A_68_P08245924 | Pias4-Eef2 | 0.751015 |
| A_68_P09657177 | Otx1       | 0.751015 |
| A_68_P08061931 | Lbxcor1    | 0.751092 |
| A_68_P07673174 | Aplp2      | 0.751115 |
| A_68_P02885891 | Edg1       | 0.751515 |
| A_68_P01704130 | C1ql3      | 0.751609 |
| A_68_P02216243 | Grem1      | 0.751653 |
| A_68_P12464812 | Pim3       | 0.751758 |

**Supplementary Table 1d: N vs KO 2330 hypermethylation genes on d100**

| Probe Name     | Gene Name     | Methylation difference value |
|----------------|---------------|------------------------------|
| A_68_P04228571 | Barhl2        | 3.337522                     |
| A_68_P14372856 | 1700019N19Rik | 3.145096                     |
| A_68_P04403726 | En2           | 3.115225                     |
| A_68_P05982951 | Tnnt3         | 2.979039                     |
| A_68_P06457634 | Adam12        | 2.937375                     |
| A_68_P02004720 | Rab22a        | 2.851541                     |
| A_68_P01573803 | Srxn1         | 2.82118                      |
| A_68_P04449097 | Suds3         | 2.814325                     |
| A_68_P13225573 | 2310039H08Rik | 2.808632                     |
| A_68_P11526170 | Sox7          | 2.769721                     |
| A_68_P10379467 | Slc25a21      | 2.753301                     |
| A_68_P05207111 | Rerg          | 2.731487                     |
| A_68_P08382720 | Msrb3         | 2.71797                      |
| A_68_P05804478 | D6Wsu116e     | 2.706824                     |
| A_68_P10147998 | Ppp2r5c       | 2.705301                     |
| A_68_P00332108 | Prrx1         | 2.700878                     |
| A_68_P01675194 | Dlx1          | 2.692303                     |
| A_68_P04613872 | Fscn1         | 2.686821                     |
| A_68_P09701217 | Grn           | 2.681831                     |
| A_68_P13219901 | Cpne5         | 2.681237                     |
| A_68_P08644962 | Pcmt1-Nup43   | 2.680099                     |
| A_68_P09663278 | Rpl23a-Rab34  | 2.677353                     |
| A_68_P01110961 | Nek2          | 2.676828                     |
| A_68_P08062567 | Ei24          | 2.675238                     |
| A_68_P07794298 | Qars          | 2.64844                      |
| A_68_P06307353 | Tial1         | 2.643263                     |
| A_68_P06099687 | Med25         | 2.635524                     |
| A_68_P05011836 | Ppm1k         | 2.626684                     |
| A_68_P03496087 | Rcc1          | 2.62644                      |
| A_68_P02385105 | Ssr3          | 2.623533                     |
| A_68_P04449097 | Suds3         | 2.617687                     |
| A_68_P00214101 | Pkp1          | 2.611459                     |
| A_68_P02629065 | Slc35a3       | 2.608849                     |

|                |               |          |
|----------------|---------------|----------|
| A_68_P09624201 | Poldip2       | 2.598509 |
| A_68_P04137440 | Nmu           | 2.592398 |
| A_68_P13977860 | Pcdhga5       | 2.58649  |
| A_68_P12092853 | Ppp1r1a       | 2.58383  |
| A_68_P06300520 | Bccip         | 2.582791 |
| A_68_P10049305 | Insm2         | 2.567687 |
| A_68_P03496087 | Rcc1          | 2.565922 |
| A_68_P03493306 | Rnf11         | 2.555736 |
| A_68_P00560687 | Lrrn2         | 2.548238 |
| A_68_P06390013 | Nfkbib-Sirt2  | 2.541628 |
| A_68_P09638187 | Rad51l3       | 2.540066 |
| A_68_P12151832 | Wnt10b        | 2.52726  |
| A_68_P09377206 | Nr1d1         | 2.524575 |
| A_68_P04812922 | Ugdh          | 2.519579 |
| A_68_P07796438 | Rexo2         | 2.517563 |
| A_68_P01878180 | Phf19         | 2.514013 |
| A_68_P09233032 | Anxa6         | 2.51313  |
| A_68_P08803491 | Zdhhc17       | 2.5042   |
| A_68_P01796557 | Ass1          | 2.502683 |
| A_68_P12784817 | St3gal6       | 2.492509 |
| A_68_P10857126 | Cdc14b        | 2.492043 |
| A_68_P04047546 | Icmt          | 2.48036  |
| A_68_P04047546 | Icmt          | 2.479973 |
| A_68_P09138754 | Hes7          | 2.479074 |
| A_68_P01948333 | Mertk         | 2.478022 |
| A_68_P11893417 | 2410187C16Rik | 2.468463 |
| A_68_P12729304 | Senp2         | 2.46389  |
| A_68_P09522954 | Nol11         | 2.457453 |
| A_68_P04337962 | Rnf4          | 2.456921 |
| A_68_P06497762 | Tmem86a       | 2.455624 |
| A_68_P01939828 | D2Erttd750e   | 2.453501 |
| A_68_P13186432 | Kcnk12        | 2.45319  |
| A_68_P04803447 | Afp           | 2.449024 |
| A_68_P05569059 | 6330503C03Rik | 2.431746 |
| A_68_P12181545 | Gdnf          | 2.430888 |

|                |                |          |
|----------------|----------------|----------|
| A_68_P12887691 | Prodh          | 2.430837 |
| A_68_P14292416 | Hps6           | 2.423795 |
| A_68_P04803447 | Afp            | 2.422914 |
| A_68_P08612561 | Gnaz           | 2.41599  |
| A_68_P06656274 | Ap2a1          | 2.410547 |
| A_68_P12264947 | BC026404:11009 | 2.401361 |
| A_68_P08384239 | 5330439J01Rik  | 2.395098 |
| A_68_P00064328 | Mpzl1          | 2.38971  |
| A_68_P09189144 | Timm22         | 2.388465 |
| A_68_P04535315 | Zfp113         | 2.385913 |
| A_68_P03457489 | Ppcs-Zmynd12   | 2.377034 |
| A_68_P12383540 | Ext1           | 2.371956 |
| A_68_P05278622 | 9130019P16Rik  | 2.369969 |
| A_68_P06438449 | Mphosph10-Mcee | 2.365081 |
| A_68_P00129081 | 1110058L19Rik  | 2.364358 |
| A_68_P01085951 | Nsl1           | 2.362552 |
| A_68_P13484729 | Tbcd24         | 2.361081 |
| A_68_P04535315 | Zfp113         | 2.358729 |
| A_68_P06854598 | Jund1          | 2.356154 |
| A_68_P10884575 | Foxc1          | 2.350868 |
| A_68_P05734641 | Gata2          | 2.350272 |
| A_68_P06201825 | Kndc1          | 2.349644 |
| A_68_P03327028 | Pigv           | 2.349577 |
| A_68_P13220762 | Cdc5l          | 2.349196 |
| A_68_P04449105 | Suds3          | 2.338022 |
| A_68_P14259431 | Kazald1        | 2.337493 |
| A_68_P05933525 | Stx4a          | 2.334643 |
| A_68_P03382917 | Tal2           | 2.332901 |
| A_68_P02550013 | Car2           | 2.330425 |
| A_68_P09366506 | Rpl27          | 2.32869  |
| A_68_P13112327 | Gabbr1         | 2.32771  |
| A_68_P08363067 | Lta4h          | 2.326955 |
| A_68_P12755135 | Thap7          | 2.322586 |
| A_68_P08649164 | Stk11          | 2.317753 |
| A_68_P14233008 | Tle4           | 2.313067 |

|                |                |          |
|----------------|----------------|----------|
| A_68_P06027267 | Hmx3           | 2.304626 |
| A_68_P06936393 | Comp           | 2.302946 |
| A_68_P09673267 | Grb7           | 2.30176  |
| A_68_P05343553 | Pde3a          | 2.301712 |
| A_68_P15159717 | Idh3g-Ssr4     | 2.297848 |
| A_68_P04083220 | Hint2          | 2.286952 |
| A_68_P03829596 | Tmem67         | 2.28632  |
| A_68_P09322877 | Lhx1           | 2.284423 |
| A_68_P02017175 | 5430407P10Rik  | 2.283616 |
| A_68_P09906321 | A830093I24Rik  | 2.280764 |
| A_68_P05005759 | Crbn           | 2.2786   |
| A_68_P13299682 | Lrg1           | 2.277395 |
| A_68_P11040977 | Col4a3bp       | 2.272894 |
| A_68_P13344540 | Bnip1          | 2.267459 |
| A_68_P00346078 | Selp           | 2.267069 |
| A_68_P12330978 | D15Wsu169e     | 2.264887 |
| A_68_P03434990 | Hes3-Icmt      | 2.263801 |
| A_68_P10183217 | Lgmn           | 2.263635 |
| A_68_P00119254 | B4galt3        | 2.259801 |
| A_68_P10418423 | Mgat2          | 2.257265 |
| A_68_P03434990 | Hes3-Icmt      | 2.256579 |
| A_68_P03361653 | Clta           | 2.253339 |
| A_68_P00957880 | Eif5b          | 2.253128 |
| A_68_P12435230 | Dnalc4         | 2.251678 |
| A_68_P11980858 | Arid2          | 2.251619 |
| A_68_P00932143 | Epha4          | 2.249608 |
| A_68_P06889526 | Tbc1d9         | 2.245753 |
| A_68_P02432272 | Man1a2         | 2.245117 |
| A_68_P09621591 | Aftph          | 2.242861 |
| A_68_P10259566 | Rgs6           | 2.24233  |
| A_68_P00830537 | Pou2f1         | 2.239323 |
| A_68_P02335661 | Adamtsl4       | 2.239011 |
| A_68_P11769454 | E430028B21Rik  | 2.238988 |
| A_68_P11367835 | Selk           | 2.237847 |
| A_68_P06458410 | A_68_P06458410 | 2.236842 |



|                |               |          |
|----------------|---------------|----------|
| A_68_P10434170 | Kcns3         | 2.235    |
| A_68_P03513133 | Elov11        | 2.233824 |
| A_68_P08079164 | Ccdc72        | 2.233702 |
| A_68_P11947922 | Npr3          | 2.225963 |
| A_68_P10113784 | Bcl11b        | 2.221893 |
| A_68_P14918066 | Ap1s2         | 2.221875 |
| A_68_P09069018 | Arl5c         | 2.22117  |
| A_68_P13174301 | Dll1          | 2.22085  |
| A_68_P05948960 | AI480556-Rras | 2.211045 |
| A_68_P07075012 | Dhodh-Pkd113  | 2.210895 |
| A_68_P08715298 | Prdm1         | 2.207515 |
| A_68_P01060395 | Jph1          | 2.202907 |
| A_68_P07074552 | Usp38         | 2.195384 |
| A_68_P13315253 | Six3          | 2.19501  |
| A_68_P09343429 | Cldn7         | 2.193336 |
| A_68_P12373485 | Atp5g2        | 2.191661 |
| A_68_P00721355 | En1           | 2.190564 |
| A_68_P09326313 | Hoxb3         | 2.188061 |
| A_68_P12873765 | Zdhhc8        | 2.185787 |
| A_68_P00545742 | Stx6          | 2.184467 |
| A_68_P05932875 | Fgf15         | 2.183996 |
| A_68_P13125876 | Akap8         | 2.183795 |
| A_68_P12062345 | Pla2g6        | 2.18107  |
| A_68_P06686735 | Cyb5b         | 2.18047  |
| A_68_P00970532 | Arl4c         | 2.179171 |
| A_68_P13191027 | Khsrp         | 2.176522 |
| A_68_P03287486 | Rps6          | 2.175643 |
| A_68_P04030531 | Pesk9         | 2.172458 |
| A_68_P04908551 | Pptc7         | 2.16907  |
| A_68_P04416495 | Maea          | 2.167954 |
| A_68_P03921654 | Trim14        | 2.167842 |
| A_68_P07185461 | Wfdc1         | 2.167173 |
| A_68_P14706450 | Diap2         | 2.164363 |
| A_68_P09080936 | AA536749      | 2.16321  |
| A_68_P03899398 | N28178        | 2.15895  |

|                |                     |          |
|----------------|---------------------|----------|
| A_68_P09420324 | B3gnt2              | 2.158856 |
| A_68_P07178939 | Zswim4              | 2.157341 |
| A_68_P02285696 | Pbxip1              | 2.156529 |
| A_68_P05908259 | 1500019G21Rik       | 2.155881 |
| A_68_P03647830 | Kti12               | 2.155011 |
| A_68_P13422177 | Dusp1               | 2.15181  |
| A_68_P04999281 | 5730596B20Rik       | 2.15035  |
| A_68_P12045930 | Sub1                | 2.149073 |
| A_68_P13494803 | Tmem112             | 2.146009 |
| A_68_P06635585 | Itpkc-Adck4         | 2.141942 |
| A_68_P08111967 | Armet               | 2.141615 |
| A_68_P11721186 | D14Ert449e          | 2.141272 |
| A_68_P10856492 | Barx1               | 2.140881 |
| A_68_P03327028 | Pigv                | 2.140202 |
| A_68_P07532738 | Edg8                | 2.133499 |
| A_68_P06112468 | Efcab4a             | 2.129958 |
| A_68_P02436068 | Ccbl2               | 2.128974 |
| A_68_P05827685 | Hoxa10              | 2.127219 |
| A_68_P01253809 | Nat10               | 2.126568 |
| A_68_P14255125 | D19Bwg1357e         | 2.126277 |
| A_68_P02778268 | Sh3glb1             | 2.126149 |
| A_68_P06001714 | Foxi2               | 2.121927 |
| A_68_P15000956 | Emd                 | 2.119857 |
| A_68_P10653099 | 6530403A03Rik       | 2.116992 |
| A_68_P03720734 | Mmel1               | 2.114946 |
| A_68_P11542106 | Itih1               | 2.114866 |
| A_68_P13169647 | Fgd2                | 2.112452 |
| A_68_P09701016 | Tcf2                | 2.11228  |
| A_68_P03963324 | Ankrd38             | 2.112091 |
| A_68_P06970993 | 5330410G16Rik-Crlf1 | 2.111277 |
| A_68_P13436852 | Brd2                | 2.106271 |
| A_68_P08318176 | Hsp90b1             | 2.105277 |
| A_68_P06342857 | Irgq                | 2.104575 |
| A_68_P00406171 | Sccpdh              | 2.104113 |
| A_68_P11739198 | Neil2               | 2.103502 |

|                |               |          |
|----------------|---------------|----------|
| A_68_P08099628 | Ccdc84        | 2.102325 |
| A_68_P08049237 | 4930579K19Rik | 2.102201 |
| A_68_P12423002 | Lmbrd2        | 2.095144 |
| A_68_P06343722 | Mrpl48        | 2.094081 |
| A_68_P08725566 | Akap12        | 2.087982 |
| A_68_P06085388 | Ccne1         | 2.087838 |
| A_68_P09666800 | Phf15         | 2.087094 |
| A_68_P12684234 | Tmem39a       | 2.086847 |
| A_68_P11545530 | EG328479      | 2.086218 |
| A_68_P04893781 | Snx8          | 2.084056 |
| A_68_P10927042 | Bmp6          | 2.083662 |
| A_68_P11270335 | Dnajc3        | 2.081282 |
| A_68_P11133279 | Zfp219        | 2.080669 |
| A_68_P09166322 | 1810009O10Rik | 2.078709 |
| A_68_P03513133 | Elov11        | 2.077287 |
| A_68_P10748794 | Ddx46         | 2.077244 |
| A_68_P03032397 | Eif4e         | 2.077016 |
| A_68_P07674282 | Acp5          | 2.076748 |
| A_68_P01920415 | Ada           | 2.076462 |
| A_68_P11869447 | Npal2         | 2.076099 |
| A_68_P11623667 | Gata4         | 2.076096 |
| A_68_P01251534 | Gata5         | 2.073989 |
| A_68_P11401551 | Pxk           | 2.073976 |
| A_68_P03720734 | Mmel1         | 2.073061 |
| A_68_P06076156 | Isoc2b        | 2.070427 |
| A_68_P04935830 | Aff1          | 2.069399 |
| A_68_P05244766 | Atp6v1f       | 2.068696 |
| A_68_P13732324 | Zadh2         | 2.068615 |
| A_68_P04948730 | Cops4         | 2.067778 |
| A_68_P14299016 | 2900009I07Rik | 2.065889 |
| A_68_P03361653 | Clta          | 2.064157 |
| A_68_P02472958 | Man1a2        | 2.063233 |
| A_68_P00299406 | Casp8         | 2.061679 |
| A_68_P12908674 | Magmas        | 2.057114 |
| A_68_P04978117 | Fosl2         | 2.05677  |

|                |                     |          |
|----------------|---------------------|----------|
| A_68_P02148754 | Gpsm1               | 2.054103 |
| A_68_P07486005 | Acvr2b              | 2.05376  |
| A_68_P08924328 | Arid5b              | 2.052915 |
| A_68_P06425567 | Rpl27a              | 2.052362 |
| A_68_P10839604 | Nkd2                | 2.051346 |
| A_68_P09752161 | Laptm4a             | 2.051258 |
| A_68_P03864897 | Bmp8a               | 2.048082 |
| A_68_P10419770 | Chx10               | 2.047039 |
| A_68_P03151582 | Magi3               | 2.04672  |
| A_68_P11949838 | Arhgap8             | 2.046082 |
| A_68_P02095922 | Edn3                | 2.045853 |
| A_68_P06168319 | Isg2011             | 2.041963 |
| A_68_P01984542 | 1700011J10Rik       | 2.040171 |
| A_68_P09330841 | Cpeb4               | 2.039201 |
| A_68_P13033674 | 1190017O12Rik       | 2.037712 |
| A_68_P02126677 | Exdl1               | 2.03753  |
| A_68_P10170178 | Six4                | 2.036455 |
| A_68_P05099470 | Cpne9               | 2.036064 |
| A_68_P12824261 | Adcy9               | 2.034187 |
| A_68_P04670414 | Paics               | 2.031744 |
| A_68_P04908551 | Pptc7               | 2.028737 |
| A_68_P10134551 | Lrfr5               | 2.028656 |
| A_68_P03944455 | Ppap2b              | 2.028107 |
| A_68_P12814189 | A_68_P12814189      | 2.027692 |
| A_68_P09987054 | 0610010D24Rik       | 2.026083 |
| A_68_P01616976 | Dido1-2310003C23Rik | 2.024599 |
| A_68_P12599271 | Etv5                | 2.022431 |
| A_68_P06832441 | Junb                | 2.02211  |
| A_68_P08068605 | Tpm1                | 2.020664 |
| A_68_P04390199 | Ung                 | 2.020266 |
| A_68_P08679914 | Scyl2               | 2.019527 |
| A_68_P13422581 | Pigq                | 2.018175 |
| A_68_P13045306 | Dcbld2              | 2.016941 |
| A_68_P12794264 | Umps                | 2.016794 |
| A_68_P06448706 | C330005M16Rik       | 2.015908 |

|                |                |          |
|----------------|----------------|----------|
| A_68_P07815971 | Mtap4          | 2.012681 |
| A_68_P04952826 | Crzl1          | 2.008026 |
| A_68_P13241937 | Nfkbie         | 2.007871 |
| A_68_P07956999 | 0610040D20Rik  | 2.007834 |
| A_68_P11342235 | Tpt1           | 2.005267 |
| A_68_P07721541 | Icam1          | 2.000976 |
| A_68_P08045069 | Cacna2d2       | 2.000386 |
| A_68_P05609111 | Bms11          | 1.998651 |
| A_68_P12192337 | Slc11a2        | 1.998181 |
| A_68_P10432329 | Cpsf2          | 1.994807 |
| A_68_P05158200 | Rad52          | 1.994582 |
| A_68_P04905346 | Fbxo21         | 1.993357 |
| A_68_P05688755 | Eno2           | 1.990397 |
| A_68_P12355067 | BC084730:-1892 | 1.989841 |
| A_68_P07180176 | Cklf           | 1.989743 |
| A_68_P06026021 | Nup98          | 1.989431 |
| A_68_P13218255 | Tcf19-Ccher1   | 1.987806 |
| A_68_P03457489 | Ppes-Zmynd12   | 1.987383 |
| A_68_P03797739 | Nrd1           | 1.987344 |
| A_68_P06607751 | Syt17          | 1.986985 |
| A_68_P04027673 | Zfp46          | 1.985715 |
| A_68_P00880287 | Tmem63a        | 1.985523 |
| A_68_P00696895 | Rdh10          | 1.984061 |
| A_68_P02288477 | Sec24b         | 1.983781 |
| A_68_P05250665 | Tera           | 1.983721 |
| A_68_P03335667 | Jak1           | 1.982117 |
| A_68_P13614340 | B4galt6        | 1.981813 |
| A_68_P04684877 | 9330182L06Rik  | 1.980818 |
| A_68_P01173313 | Stx16          | 1.980801 |
| A_68_P14301695 | Rcor2          | 1.978289 |
| A_68_P05822226 | 9630033F20Rik  | 1.977234 |
| A_68_P02631941 | Nexn           | 1.97718  |
| A_68_P11937882 | BC030396       | 1.975466 |
| A_68_P06580235 | Cldnd2         | 1.974643 |
| A_68_P00810608 | Rnf2           | 1.97213  |

|                |               |          |
|----------------|---------------|----------|
| A_68_P04560031 | Crmp1         | 1.971663 |
| A_68_P14640431 | Mtmr1         | 1.9704   |
| A_68_P08598543 | Cd24a         | 1.969615 |
| A_68_P05723966 | 2310016C08Rik | 1.969236 |
| A_68_P02117183 | Vav2          | 1.968789 |
| A_68_P07769329 | Isl2          | 1.968524 |
| A_68_P11718247 | Tspan14       | 1.966827 |
| A_68_P09124584 | Nxph3         | 1.966222 |
| A_68_P04389279 | Fscn1         | 1.965866 |
| A_68_P07172050 | Has3          | 1.96488  |
| A_68_P11569544 | Ebf2          | 1.964338 |
| A_68_P12589363 | Nfkbiz        | 1.960452 |
| A_68_P03019531 | H2afz         | 1.96004  |
| A_68_P02478471 | Npr1-Ilf2     | 1.959865 |
| A_68_P07607157 | Srpr          | 1.959407 |
| A_68_P12402447 | Spryd3-Igfbp6 | 1.956744 |
| A_68_P05972807 | Rps5          | 1.956179 |
| A_68_P00990943 | F11r          | 1.956017 |
| A_68_P06727785 | Galnt2        | 1.95572  |
| A_68_P02123485 | Manbal        | 1.955227 |
| A_68_P08711980 | Fbxo7         | 1.954184 |
| A_68_P01906139 | Pmpca         | 1.953636 |
| A_68_P13064207 | Cuta          | 1.953298 |
| A_68_P08930401 | Slc39a3       | 1.952323 |
| A_68_P10523836 | 5133401N09Rik | 1.951918 |
| A_68_P08736561 | Atp2b1        | 1.950118 |
| A_68_P12674816 | Dvl3          | 1.95006  |
| A_68_P01503914 | Zc3h15        | 1.94968  |
| A_68_P09941671 | Sstr1         | 1.949546 |
| A_68_P09648257 | Tha1          | 1.948933 |
| A_68_P11646964 | Abhd4         | 1.946547 |
| A_68_P11311120 | Trim35        | 1.946456 |
| A_68_P03455183 | Pappa         | 1.946385 |
| A_68_P15160009 | Usp9x         | 1.946143 |
| A_68_P04263717 | Tbc1d1        | 1.943967 |

|                |                    |          |
|----------------|--------------------|----------|
| A_68_P00866275 | B3gnt7             | 1.943838 |
| A_68_P05844417 | 6332401O19Rik      | 1.942303 |
| A_68_P14284359 | Trim8              | 1.941409 |
| A_68_P07265861 | Pard3              | 1.940612 |
| A_68_P05636961 | Fkbp14-Plekha8     | 1.939769 |
| A_68_P14391999 | Pten               | 1.938965 |
| A_68_P08365485 | Mbc2               | 1.938767 |
| A_68_P01716379 | Cbln4              | 1.938124 |
| A_68_P09651122 | 2400006H24Rik      | 1.934648 |
| A_68_P00892242 | Rgs16              | 1.934632 |
| A_68_P00740546 | Fzd5               | 1.93438  |
| A_68_P12620501 | A_68_P12620501     | 1.933355 |
| A_68_P05234904 | Vps24              | 1.932617 |
| A_68_P07729237 | Dnmt1              | 1.93211  |
| A_68_P09433957 | 0610009B22Rik      | 1.932084 |
| A_68_P09349429 | Pscd1              | 1.931757 |
| A_68_P08465679 | 4930430F08Rik      | 1.930634 |
| A_68_P07890310 | Axud1              | 1.929324 |
| A_68_P00456630 | Nck2               | 1.928157 |
| A_68_P07439349 | Kcnk1              | 1.927991 |
| A_68_P09669852 | Car10              | 1.927179 |
| A_68_P11481863 | Ift88              | 1.927044 |
| A_68_P09817675 | 0610009D07Rik      | 1.926969 |
| A_68_P06620745 | Phca               | 1.925161 |
| A_68_P00938087 | Angel2             | 1.923666 |
| A_68_P10044582 | Gphn               | 1.919722 |
| A_68_P09017457 | 2310040C09Rik      | 1.91907  |
| A_68_P03079371 | Txnip              | 1.918119 |
| A_68_P01876102 | Dpm1               | 1.917988 |
| A_68_P01300229 | AA467197           | 1.914943 |
| A_68_P00776589 | Zfp142-Bcs11       | 1.914869 |
| A_68_P12958422 | Alg3-1810009K13Rik | 1.913965 |
| A_68_P07887111 | Dock6              | 1.913214 |
| A_68_P06158591 | Fgf3               | 1.911033 |
| A_68_P04210835 | Pdx1               | 1.908985 |

|                |               |          |
|----------------|---------------|----------|
| A_68_P13439828 | Ptprs         | 1.908575 |
| A_68_P10007352 | Sfrs5         | 1.907147 |
| A_68_P07651826 | Camkv         | 1.907073 |
| A_68_P09249597 | Ntn1          | 1.906636 |
| A_68_P14527591 | Klhl15        | 1.903352 |
| A_68_P13871877 | AW554918      | 1.901854 |
| A_68_P06062478 | Zfp74         | 1.901011 |
| A_68_P07809708 | Rbms3         | 1.90013  |
| A_68_P10586886 | 1110007C09Rik | 1.898274 |
| A_68_P04667146 | Eif2b4        | 1.897879 |
| A_68_P05417396 | Repin1        | 1.897635 |
| A_68_P06413702 | Prss8         | 1.895674 |
| A_68_P11120668 | Foxd1         | 1.895428 |
| A_68_P03223683 | Rarsl         | 1.894904 |
| A_68_P13228720 | Ccdc128       | 1.892804 |
| A_68_P14333432 | Eml3          | 1.888811 |
| A_68_P03474445 | Rdhe2         | 1.888319 |
| A_68_P12183136 | Fmnl3         | 1.887823 |
| A_68_P10061368 | Pygl          | 1.886236 |
| A_68_P08314943 | Oaz1          | 1.886217 |
| A_68_P09838513 | Fos           | 1.885224 |
| A_68_P07790130 | Slc17a5       | 1.883521 |
| A_68_P01401963 | Hoxd11        | 1.88264  |
| A_68_P01516110 | Csrp2bp       | 1.881846 |
| A_68_P01197425 | Ndufaf1       | 1.879618 |
| A_68_P05581130 | Bpgm          | 1.879051 |
| A_68_P09672660 | Sox9          | 1.878904 |
| A_68_P12069494 | Tars          | 1.878792 |
| A_68_P08148574 | Raver1        | 1.878444 |
| A_68_P14431117 | Sfl           | 1.878406 |
| A_68_P00793457 | Aldh9a1       | 1.878231 |
| A_68_P03245499 | Ripk2         | 1.877528 |
| A_68_P12962987 | Yars2         | 1.877052 |
| A_68_P05222011 | Prmt8         | 1.876623 |
| A_68_P08546101 | Rdh7          | 1.876195 |



|                |                          |          |
|----------------|--------------------------|----------|
| A_68_P03655599 | ENSMUST00000095076.1:224 | 1.875514 |
| A_68_P10947641 | Hist1h1c                 | 1.87511  |
| A_68_P03439026 | 2810432D09Rik            | 1.874903 |
| A_68_P08436635 | D630029K05Rik            | 1.873171 |
| A_68_P04952826 | Crzl1                    | 1.873044 |
| A_68_P06075552 | Bet1l-Ric8               | 1.870882 |
| A_68_P12007011 | Exosc4                   | 1.868498 |
| A_68_P14159635 | Hrasls3                  | 1.867799 |
| A_68_P05266008 | Zfp398                   | 1.867225 |
| A_68_P07676962 | Eif3s4                   | 1.866679 |
| A_68_P01189722 | St6galnac4               | 1.866021 |
| A_68_P04667146 | Eif2b4                   | 1.86455  |
| A_68_P04138116 | Fzd10                    | 1.8636   |
| A_68_P12304021 | Ncald                    | 1.863015 |
| A_68_P12697673 | Vpreb1-Top3b             | 1.862771 |
| A_68_P12545629 | Rbm11                    | 1.862306 |
| A_68_P06268416 | Stk32c                   | 1.861404 |
| A_68_P06935487 | Arhgef7                  | 1.860604 |
| A_68_P09221699 | Crkrs                    | 1.860319 |
| A_68_P08400813 | Cited2                   | 1.859894 |
| A_68_P12246611 | Myo10                    | 1.859541 |
| A_68_P13334488 | Ltbp1                    | 1.858353 |
| A_68_P10082912 | Txndc1                   | 1.858171 |
| A_68_P01486059 | Samhd1                   | 1.857424 |
| A_68_P01703022 | 2610042O14Rik            | 1.855304 |
| A_68_P02423351 | Tacr3                    | 1.853351 |
| A_68_P00445898 | Traf5                    | 1.852635 |
| A_68_P11139984 | Nefl                     | 1.851324 |
| A_68_P01382492 | D730039F16Rik            | 1.851049 |
| A_68_P03938702 | Spen-B330016D10Rik       | 1.849492 |
| A_68_P10997874 | Ptch1                    | 1.849287 |
| A_68_P02301655 | Mrpl9                    | 1.848722 |
| A_68_P08250811 | Matk                     | 1.848539 |
| A_68_P06586389 | Hdgfrp3                  | 1.846919 |
| A_68_P10593859 | Cox7c                    | 1.84656  |

|                |               |          |
|----------------|---------------|----------|
| A_68_P13318970 | Trim10        | 1.84607  |
| A_68_P14154231 | Mgea5         | 1.845361 |
| A_68_P11431014 | Mrp63         | 1.845236 |
| A_68_P05969121 | Tnfrsf19l     | 1.845226 |
| A_68_P08976800 | 2410008K03Rik | 1.844374 |
| A_68_P05459434 | Atoh8         | 1.84427  |
| A_68_P05438081 | Kcna1         | 1.843801 |
| A_68_P09685128 | Ormdl3        | 1.843799 |
| A_68_P04560031 | Crmp1         | 1.843033 |
| A_68_P09647261 | Rpl38         | 1.842621 |
| A_68_P04538401 | Rxfp2         | 1.841305 |
| A_68_P01621810 | 2310010M24Rik | 1.840758 |
| A_68_P09006082 | Hoxb4         | 1.83987  |
| A_68_P13176455 | Galnt14       | 1.838707 |
| A_68_P12563206 | Ncbp2         | 1.838584 |
| A_68_P03630396 | Asah3l        | 1.838544 |
| A_68_P02791266 | Bcar3         | 1.837614 |
| A_68_P13219394 | 4732474A20Rik | 1.837392 |
| A_68_P06967275 | Chst5         | 1.837288 |
| A_68_P06166301 | Sphk2         | 1.83645  |
| A_68_P04684119 | Prkag2        | 1.836316 |
| A_68_P02997179 | Col25a1       | 1.835986 |
| A_68_P10443608 | Rgnef         | 1.834864 |
| A_68_P10373895 | Strn3         | 1.833957 |
| A_68_P14131438 | Cdx1-Pdgfrb   | 1.833786 |
| A_68_P14369749 | Minpp1        | 1.833212 |
| A_68_P09856737 | Hspa2         | 1.833131 |
| A_68_P09159521 | Wdr68         | 1.832603 |
| A_68_P13317232 | Nudt12        | 1.832238 |
| A_68_P11457289 | Isgf3g        | 1.831971 |
| A_68_P09506042 | Klhl11        | 1.830911 |
| A_68_P06573624 | Hras1-Lrrc56  | 1.830581 |
| A_68_P08477979 | Nfic          | 1.829644 |
| A_68_P14557687 | Fmr1          | 1.82935  |
| A_68_P14478327 | Cyp26a1       | 1.829157 |

|                |               |          |
|----------------|---------------|----------|
| A_68_P13799338 | Zfp438        | 1.828568 |
| A_68_P06348925 | Tgfb1         | 1.827855 |
| A_68_P14183872 | Rbm14         | 1.827755 |
| A_68_P08883214 | Trhde         | 1.82693  |
| A_68_P10383006 | Ttc8          | 1.826405 |
| A_68_P00209581 | Ripk5         | 1.825991 |
| A_68_P05430011 | Setd5         | 1.825365 |
| A_68_P04595878 | Dhx15         | 1.825298 |
| A_68_P11769809 | Hs6st3        | 1.824872 |
| A_68_P10194608 | Gpr65         | 1.824486 |
| A_68_P00288847 | C030014K22Rik | 1.824318 |
| A_68_P02437875 | Wdr77         | 1.822024 |
| A_68_P00389123 | Adss          | 1.821613 |
| A_68_P02074284 | Frmd5         | 1.819823 |
| A_68_P03581015 | Ubiad1        | 1.819455 |
| A_68_P13980028 | Abhd3         | 1.817887 |
| A_68_P04548919 | Bapx1         | 1.81605  |
| A_68_P03634721 | Ccdc21        | 1.815145 |
| A_68_P08341329 | Fstl3         | 1.813945 |
| A_68_P12109018 | Rapgef3       | 1.813844 |
| A_68_P01593485 | Rpl35         | 1.812215 |
| A_68_P13331989 | Scube3        | 1.811348 |
| A_68_P04047233 | Necap2        | 1.810617 |
| A_68_P02560176 | Efna1         | 1.810066 |
| A_68_P08386191 | AK122525      | 1.80997  |
| A_68_P12008927 | Myc           | 1.809744 |
| A_68_P06855930 | Ednra         | 1.809399 |
| A_68_P04601964 | Qdpr          | 1.808536 |
| A_68_P08153495 | Slc26a6       | 1.808466 |
| A_68_P11888723 | Poldip3       | 1.808406 |
| A_68_P06660845 | Arntl         | 1.8083   |
| A_68_P10511179 | Ryr2          | 1.806094 |
| A_68_P14154178 | Ina           | 1.805548 |
| A_68_P04800330 | Nup54         | 1.804385 |
| A_68_P11172854 | Egr3          | 1.80396  |

|                |                     |          |
|----------------|---------------------|----------|
| A_68_P11713637 | 1700123O20Rik       | 1.803103 |
| A_68_P05892293 | Sbk1                | 1.801705 |
| A_68_P13214626 | Trip10              | 1.801488 |
| A_68_P04182394 | 2810006K23Rik       | 1.800519 |
| A_68_P06096079 | Adam12              | 1.800359 |
| A_68_P09565009 | D11Ert636e          | 1.80029  |
| A_68_P08473002 | Smarchb1            | 1.799823 |
| A_68_P07318774 | Gcsh                | 1.798402 |
| A_68_P13330489 | Ehd3                | 1.797926 |
| A_68_P00020230 | Rnf152              | 1.793962 |
| A_68_P01286134 | Ptpn1               | 1.793102 |
| A_68_P06987885 | Ppp1r3b             | 1.792529 |
| A_68_P11711513 | Rpp14               | 1.790412 |
| A_68_P13510246 | Srpk1               | 1.78949  |
| A_68_P06330220 | Pop4                | 1.789264 |
| A_68_P00872357 | Zbtb41              | 1.788646 |
| A_68_P10186628 | Dgkb                | 1.788447 |
| A_68_P04846735 | Rasgef1b            | 1.787135 |
| A_68_P01319108 | Urm1                | 1.785789 |
| A_68_P06334357 | Kctd15              | 1.784588 |
| A_68_P09423036 | Hes7                | 1.784279 |
| A_68_P14103444 | Ppp2r2b             | 1.783314 |
| A_68_P00786420 | Tnrc15              | 1.781588 |
| A_68_P08766840 | Atcay-9130206N08Rik | 1.780705 |
| A_68_P03699707 | Ints8               | 1.778848 |
| A_68_P09241039 | Tmc6-Tmc8           | 1.778752 |
| A_68_P04729371 | Ap1s1               | 1.778535 |
| A_68_P07422547 | Cpne7               | 1.777714 |
| A_68_P00606676 | Gpa33               | 1.777635 |
| A_68_P05952222 | Gab2                | 1.777073 |
| A_68_P09238663 | Psm11               | 1.776178 |
| A_68_P03581015 | Ubiad1              | 1.775831 |
| A_68_P09261833 | Eme1                | 1.775159 |
| A_68_P05273970 | Plxna4              | 1.774646 |
| A_68_P00388163 | Ccnt2               | 1.773014 |

|                |               |          |
|----------------|---------------|----------|
| A_68_P03775227 | Mllt3         | 1.772663 |
| A_68_P12210303 | Hdac10        | 1.772369 |
| A_68_P13748923 | Zadh2         | 1.771622 |
| A_68_P14704384 | Cited1        | 1.771592 |
| A_68_P03776838 | Adfp          | 1.769984 |
| A_68_P07374777 | Irf2          | 1.769691 |
| A_68_P03811052 | 4732473B16Rik | 1.769297 |
| A_68_P03864894 | Bmp8a         | 1.766879 |
| A_68_P09708163 | Hoxb9         | 1.766718 |
| A_68_P06299201 | Snrpal        | 1.764489 |
| A_68_P10787950 | Isl1          | 1.763965 |
| A_68_P09161409 | Scrn2         | 1.763278 |
| A_68_P00000588 | Tmem37        | 1.762367 |
| A_68_P04125045 | Prom1         | 1.761691 |
| A_68_P08332822 | Foxo3a        | 1.761521 |
| A_68_P09218206 | Ift20         | 1.761444 |
| A_68_P01681116 | Hars2         | 1.761426 |
| A_68_P01674549 | 2610528K11Rik | 1.761283 |
| A_68_P01516448 | Acvr1         | 1.760655 |
| A_68_P12180199 | Lrrc24        | 1.760408 |
| A_68_P06816947 | Ddx39         | 1.760161 |
| A_68_P07155758 | Ctcf          | 1.759927 |
| A_68_P13700686 | Wdr36         | 1.759812 |
| A_68_P11593283 | D930049A15Rik | 1.758734 |
| A_68_P09207936 | Sf3a1         | 1.758458 |
| A_68_P00998730 | Apoa2         | 1.758143 |
| A_68_P07169042 | AA960436      | 1.757389 |
| A_68_P05969116 | Tnfrsf19l     | 1.756815 |
| A_68_P03184721 | Sf3b4         | 1.75656  |
| A_68_P04324543 | Nat8l         | 1.755839 |
| A_68_P01755233 | 4930519N13Rik | 1.755724 |
| A_68_P08376671 | Dusp6         | 1.754486 |
| A_68_P11911306 | Fkbp11        | 1.754095 |
| A_68_P08984861 | Zfp39         | 1.754037 |
| A_68_P09503254 | BC018371      | 1.753894 |

|                |                 |          |
|----------------|-----------------|----------|
| A_68_P03864879 | Toe1            | 1.752791 |
| A_68_P14159560 | AI450540        | 1.752385 |
| A_68_P07933913 | Tspan3          | 1.752353 |
| A_68_P10327112 | Six1            | 1.751268 |
| A_68_P07738687 | Ncam1           | 1.75125  |
| A_68_P05315942 | Tspan33         | 1.751159 |
| A_68_P11186339 | Slc7a8          | 1.750646 |
| A_68_P13317958 | Acat3           | 1.750378 |
| A_68_P08663643 | Tspyl4          | 1.750367 |
| A_68_P00722343 | Des             | 1.750316 |
| A_68_P01202677 | Dlx2            | 1.749273 |
| A_68_P03867476 | Clstn1          | 1.748435 |
| A_68_P00328324 | Tuba4           | 1.745586 |
| A_68_P08293317 | Pah             | 1.74374  |
| A_68_P00103028 | Asb1            | 1.743407 |
| A_68_P05962045 | 2900092E17Rik   | 1.742634 |
| A_68_P14284014 | 2700081O15Rik   | 1.74255  |
| A_68_P00995388 | Stk16           | 1.742184 |
| A_68_P06079493 | Neud4           | 1.741264 |
| A_68_P13152165 | Ppp2r1a         | 1.740901 |
| A_68_P00170988 | Tmem177         | 1.74037  |
| A_68_P04283534 | Sgcb            | 1.738892 |
| A_68_P14015951 | Cabyr           | 1.738727 |
| A_68_P07403071 | Fut10           | 1.738418 |
| A_68_P01324447 | Mafb            | 1.736316 |
| A_68_P14555209 | Ndufa1-Rnfl13a1 | 1.735577 |
| A_68_P02947763 | Spg20           | 1.735354 |
| A_68_P08907905 | Ppm1h           | 1.735003 |
| A_68_P09978294 | Papln           | 1.734515 |
| A_68_P13905974 | Tubb6           | 1.734457 |
| A_68_P04595878 | Dhx15           | 1.734154 |
| A_68_P00872587 | Smg7            | 1.733663 |
| A_68_P12623101 | Txndc11         | 1.733618 |
| A_68_P09554165 | Eif4enif1       | 1.733182 |
| A_68_P00579109 | Rabgap11        | 1.732825 |

|                |                     |          |
|----------------|---------------------|----------|
| A_68_P02088647 | Atp5g3              | 1.731854 |
| A_68_P13508778 | Wdr27-1600012H06Rik | 1.73184  |
| A_68_P13190395 | Pacsin1             | 1.73159  |
| A_68_P14378156 | Slc15a3             | 1.73105  |
| A_68_P07596191 | Kirrel3             | 1.730882 |
| A_68_P09474548 | Hoxb3               | 1.730867 |
| A_68_P05749221 | Cops7a              | 1.730325 |
| A_68_P01804677 | Polr3f              | 1.730187 |
| A_68_P12416339 | Myh9                | 1.728982 |
| A_68_P14409670 | Rce1                | 1.728658 |
| A_68_P11475668 | Psme2-Rnf31         | 1.728398 |
| A_68_P00179487 | Dusp27              | 1.728198 |
| A_68_P12069241 | Phf5a               | 1.72766  |
| A_68_P10039268 | Rps7                | 1.727634 |
| A_68_P14198559 | Tmem132a            | 1.726872 |
| A_68_P12916411 | Aifm3               | 1.726358 |
| A_68_P03516417 | Fndc5               | 1.726181 |
| A_68_P05290376 | Pigy                | 1.726054 |
| A_68_P04729379 | Ap1s1               | 1.725298 |
| A_68_P06225259 | Zfp36               | 1.725124 |
| A_68_P02263285 | Prkra               | 1.723874 |
| A_68_P08840705 | Arid3a              | 1.723529 |
| A_68_P11363424 | Pcdh8               | 1.723335 |
| A_68_P12395393 | Tcf20               | 1.722789 |
| A_68_P06424695 | Irf2bp1             | 1.722317 |
| A_68_P01458385 | 2810003C17Rik       | 1.721704 |
| A_68_P03867476 | Clstn1              | 1.720799 |
| A_68_P08453527 | Arl1                | 1.720695 |
| A_68_P11686771 | Egr3                | 1.720471 |
| A_68_P01455729 | Gata3               | 1.720392 |
| A_68_P05769184 | Plxna1              | 1.720205 |
| A_68_P14560524 | Chst7               | 1.720109 |
| A_68_P03503055 | Dmrta1              | 1.719373 |
| A_68_P00443803 | Ptma                | 1.718924 |
| A_68_P00828037 | AW822216            | 1.718648 |

|                |               |          |
|----------------|---------------|----------|
| A_68_P03434986 | Hes3-Icmt     | 1.718577 |
| A_68_P02301018 | Ahcy11        | 1.718529 |
| A_68_P09052542 | Alkbh5        | 1.7185   |
| A_68_P06245175 | Nr2f2         | 1.717927 |
| A_68_P05768851 | Gmcl1         | 1.716762 |
| A_68_P05298582 | Tex261        | 1.716549 |
| A_68_P11724371 | Ngdn          | 1.716068 |
| A_68_P13547884 | Pla2g7        | 1.715797 |
| A_68_P12456697 | Mtdh          | 1.715426 |
| A_68_P04596407 | Dtx1          | 1.713837 |
| A_68_P03743542 | Zswim5        | 1.713427 |
| A_68_P01640750 | Zbtb6         | 1.712778 |
| A_68_P07423734 | Slc7a5        | 1.712762 |
| A_68_P09703840 | Epn3          | 1.71174  |
| A_68_P01680443 | Svs2          | 1.711699 |
| A_68_P07370238 | Pgpep1        | 1.711637 |
| A_68_P10785733 | 1300014I06Rik | 1.710798 |
| A_68_P13332835 | Vapa          | 1.709893 |
| A_68_P06023142 | Rnh1          | 1.709555 |
| A_68_P06272066 | Chrna7        | 1.708289 |
| A_68_P08843330 | 5330439J01Rik | 1.708279 |
| A_68_P14420129 | Ldb1          | 1.707862 |
| A_68_P06965881 | Bcnp1         | 1.707692 |
| A_68_P07498595 | Cdc25a        | 1.707615 |
| A_68_P04306176 | Asl-Crep      | 1.707418 |
| A_68_P09557146 | Rpl23         | 1.707408 |
| A_68_P05730788 | Ptms          | 1.707111 |
| A_68_P12503063 | Parn-Bfar     | 1.707046 |
| A_68_P05606174 | Ogg1          | 1.70665  |
| A_68_P05303383 | Tsen2         | 1.705893 |
| A_68_P04884115 | Scfd2         | 1.705755 |
| A_68_P10002168 | Dpf3          | 1.705204 |
| A_68_P02325182 | E130311K13Rik | 1.705071 |
| A_68_P07831910 | Tle3          | 1.704956 |
| A_68_P13460407 | Tcte2         | 1.704381 |



|                |                           |          |
|----------------|---------------------------|----------|
| A_68_P03328783 | Ube2j2                    | 1.703715 |
| A_68_P12807535 | 2410018G20Rik             | 1.703577 |
| A_68_P13503075 | Dus3l                     | 1.703471 |
| A_68_P13384191 | Sfrs3                     | 1.702603 |
| A_68_P09066771 | Erbp2                     | 1.702551 |
| A_68_P11303295 | Spes1-Glt8d1              | 1.702497 |
| A_68_P02020198 | Dll4                      | 1.702451 |
| A_68_P11755499 | Mtmt6                     | 1.701921 |
| A_68_P06301883 | Vasp                      | 1.701378 |
| A_68_P08890341 | Spock2                    | 1.701125 |
| A_68_P05590268 | Bhlhb3                    | 1.70085  |
| A_68_P09262493 | Aldh3a2                   | 1.699748 |
| A_68_P02134951 | Ypel4                     | 1.69969  |
| A_68_P03781928 | Rpa2                      | 1.699175 |
| A_68_P14773710 | Magee1                    | 1.698852 |
| A_68_P04306176 | Asl-Crcp                  | 1.698774 |
| A_68_P04403733 | En2                       | 1.698519 |
| A_68_P09080309 | ENSMUST00000083461.1:-590 | 1.697824 |
| A_68_P09142915 | Psme4                     | 1.697293 |
| A_68_P06544357 | B4galnt4                  | 1.696913 |
| A_68_P01293841 | Samd10                    | 1.696364 |
| A_68_P09704973 | Mif4gd                    | 1.695739 |
| A_68_P11960753 | Pick1                     | 1.694812 |
| A_68_P12281145 | Mal2                      | 1.693748 |
| A_68_P12108249 | Hoxc10                    | 1.693111 |
| A_68_P14823993 | Suhw3                     | 1.692958 |
| A_68_P09708172 | Hoxb9                     | 1.692604 |
| A_68_P06900371 | Ogfod1                    | 1.691893 |
| A_68_P01584465 | Gata3                     | 1.691341 |
| A_68_P12616352 | 2310008H04Rik             | 1.690565 |
| A_68_P04877098 | Slc2a9                    | 1.690487 |
| A_68_P12751159 | B830017H08Rik             | 1.688537 |
| A_68_P10541875 | Heatr1                    | 1.688105 |
| A_68_P06578180 | D930014E17Rik             | 1.688002 |
| A_68_P08431950 | Fyn                       | 1.687206 |

|                |               |          |
|----------------|---------------|----------|
| A_68_P00288848 | C030014K22Rik | 1.685283 |
| A_68_P07506973 | Entpd3        | 1.684866 |
| A_68_P10863564 | Net1          | 1.68452  |
| A_68_P13093048 | 1600002H07Rik | 1.684437 |
| A_68_P03260050 | Fblim1        | 1.684392 |
| A_68_P07220940 | Irx3          | 1.683895 |
| A_68_P10682964 | Hist1h1a      | 1.683234 |
| A_68_P03553944 | Plk3          | 1.683078 |
| A_68_P10677979 | Zfp322a       | 1.682715 |
| A_68_P08286568 | Tmem19        | 1.682456 |
| A_68_P05817882 | Mrpl19        | 1.680437 |
| A_68_P07069639 | Bag4-Lsm1     | 1.680056 |
| A_68_P06469960 | Cttn          | 1.679442 |
| A_68_P07653994 | Prkcsb        | 1.679157 |
| A_68_P05396284 | D830050J10Rik | 1.678857 |
| A_68_P10039265 | Rps7          | 1.678073 |
| A_68_P13512342 | Epas1         | 1.678065 |
| A_68_P04722013 | Ccdc98        | 1.675983 |
| A_68_P04877098 | Slc2a9        | 1.675097 |
| A_68_P12219855 | Hoxc5         | 1.674433 |
| A_68_P12396652 | Egflam        | 1.67426  |
| A_68_P07321881 | Gnao1         | 1.673656 |
| A_68_P14356802 | Dmrt2         | 1.673581 |
| A_68_P06522130 | Vps33b        | 1.672889 |
| A_68_P14671288 | Fgd1          | 1.672744 |
| A_68_P01498746 | Wfdc2         | 1.672504 |
| A_68_P09507747 | Rab1          | 1.67214  |
| A_68_P08737710 | Atp5b         | 1.671607 |
| A_68_P02866300 | Alg5          | 1.670905 |
| A_68_P07915232 | Trip4-Csnk1g1 | 1.670707 |
| A_68_P07180083 | Rnf166        | 1.670448 |
| A_68_P12027768 | Rbm9          | 1.670286 |
| A_68_P04500317 | Crlz1         | 1.669335 |
| A_68_P05701894 | Rpia          | 1.668941 |
| A_68_P11868103 | Khdrbs3       | 1.668939 |

|                |                            |          |
|----------------|----------------------------|----------|
| A_68_P09087916 | Stc2                       | 1.668905 |
| A_68_P11025669 | Tmem14c                    | 1.668857 |
| A_68_P02133839 | Plxdc2                     | 1.668637 |
| A_68_P10589495 | Hist1h3d                   | 1.668575 |
| A_68_P00091256 | Kcne4                      | 1.668537 |
| A_68_P09547535 | BC017647                   | 1.667692 |
| A_68_P13626011 | Iws1                       | 1.667263 |
| A_68_P04178934 | Poln                       | 1.667051 |
| A_68_P10129716 | Spata7                     | 1.66479  |
| A_68_P01025277 | Il10                       | 1.664124 |
| A_68_P13075872 | Mas1-Mrgprh                | 1.6641   |
| A_68_P03953505 | Ppp1r8                     | 1.663976 |
| A_68_P06141027 | Zfp260                     | 1.663519 |
| A_68_P12890514 | ENSMUST00000083623.1:-2960 | 1.663158 |
| A_68_P09838128 | Nudt14                     | 1.662503 |
| A_68_P13161337 | Rpl10a                     | 1.662411 |
| A_68_P01768988 | Drbp1                      | 1.662359 |
| A_68_P15046048 | Gm784                      | 1.661855 |
| A_68_P02202234 | Sstr4                      | 1.661746 |
| A_68_P12158711 | Sqle                       | 1.661348 |
| A_68_P13816356 | Lman1                      | 1.66125  |
| A_68_P12915716 | Fgf12                      | 1.661158 |
| A_68_P15077927 | Prkx                       | 1.66101  |
| A_68_P03376755 | Tmem50a-D4Wsu53e           | 1.660885 |
| A_68_P07289572 | Atbf1                      | 1.660011 |
| A_68_P11457660 | Gja3                       | 1.660002 |
| A_68_P03188323 | Mtx1-Thbs3                 | 1.659444 |
| A_68_P03745420 | Ak311                      | 1.658886 |
| A_68_P05957743 | Nkx6-2                     | 1.658826 |
| A_68_P09321734 | ENSMUST00000083461.1:-1777 | 1.658065 |
| A_68_P12584284 | Dscr3                      | 1.657802 |
| A_68_P00432589 | Ormdl1                     | 1.65629  |
| A_68_P01419213 | Nudt5                      | 1.656072 |
| A_68_P06693274 | Irx5                       | 1.65607  |
| A_68_P11677837 | Bmp4                       | 1.656029 |

|                |               |          |
|----------------|---------------|----------|
| A_68_P01752384 | Nkx2-4        | 1.655796 |
| A_68_P06355575 | Slco3a1       | 1.655768 |
| A_68_P10030336 | C79407        | 1.655707 |
| A_68_P01622552 | C230093N12Rik | 1.655381 |
| A_68_P01695051 | Jag1          | 1.655124 |
| A_68_P06307345 | Tial1         | 1.654845 |
| A_68_P15201514 | Tbl1x         | 1.654516 |
| A_68_P03409745 | Il28ra        | 1.653951 |
| A_68_P09719063 | Cbx4          | 1.653835 |
| A_68_P05128177 | 1200009O22Rik | 1.65334  |
| A_68_P14329457 | Taf5          | 1.652192 |
| A_68_P13462804 | Igfals        | 1.652167 |
| A_68_P02035365 | Rnd3          | 1.65114  |
| A_68_P06803453 | Tlr3          | 1.650893 |
| A_68_P09085134 | Ube2b         | 1.649532 |
| A_68_P11070381 | Otp           | 1.649385 |
| A_68_P01120360 | Igsf8         | 1.649202 |
| A_68_P01482765 | Hoxd12        | 1.648778 |
| A_68_P09149834 | Nxn-Timm22    | 1.6485   |
| A_68_P14229223 | Cpn1          | 1.648461 |
| A_68_P13176695 | Cul7          | 1.647963 |
| A_68_P09330633 | Kcnab3        | 1.647857 |
| A_68_P01718932 | Ift52         | 1.647155 |
| A_68_P10113821 | Jundm2        | 1.646612 |
| A_68_P08075208 | Slc25a36      | 1.646602 |
| A_68_P06444726 | Snrpa         | 1.646338 |
| A_68_P10175037 | Kcnh5         | 1.646201 |
| A_68_P06633522 | Igf1r         | 1.646172 |
| A_68_P04606893 | Pex1          | 1.646168 |
| A_68_P04460565 | Sh2b3         | 1.645025 |
| A_68_P10526799 | Pik3r1        | 1.644761 |
| A_68_P01402496 | Mfap1a        | 1.644506 |
| A_68_P02138222 | Ogfr          | 1.644398 |
| A_68_P09651376 | Actg1         | 1.644165 |
| A_68_P12323949 | LOC432982     | 1.643447 |

|                |               |          |
|----------------|---------------|----------|
| A_68_P03798082 | Urod          | 1.6433   |
| A_68_P03413444 | Col9a2        | 1.6431   |
| A_68_P09408321 | Slc39a11      | 1.642626 |
| A_68_P08138725 | Mcam          | 1.642431 |
| A_68_P03798082 | Urod          | 1.641807 |
| A_68_P12873481 | Dscr2         | 1.641582 |
| A_68_P03984305 | Nfib          | 1.640884 |
| A_68_P02065709 | Dpm1          | 1.640334 |
| A_68_P13230180 | AU023871      | 1.639589 |
| A_68_P12651543 | Plal1a        | 1.63957  |
| A_68_P10953282 | Gadd45g       | 1.639249 |
| A_68_P04789378 | Caln1         | 1.639172 |
| A_68_P03263077 | 2410166I05Rik | 1.63904  |
| A_68_P00503604 | Hes6          | 1.638552 |
| A_68_P03703211 | Tesk2         | 1.637874 |
| A_68_P09153352 | Rnf185        | 1.637563 |
| A_68_P00896384 | Zfp617-Spata3 | 1.637487 |
| A_68_P03984305 | Nfib          | 1.637087 |
| A_68_P11815325 | Jub           | 1.636895 |
| A_68_P04582584 | Flt1          | 1.636686 |
| A_68_P00153972 | Creg1         | 1.635479 |
| A_68_P10223860 | Sox11         | 1.634773 |
| A_68_P13015323 | 2510009E07Rik | 1.634377 |
| A_68_P06398753 | Cpeb1         | 1.634209 |
| A_68_P00575076 | Ivns1abp      | 1.63407  |
| A_68_P11677501 | Gfra2         | 1.633858 |
| A_68_P13957248 | Fzd8          | 1.633823 |
| A_68_P01216278 | 1110008F13Rik | 1.633377 |
| A_68_P09322158 | Utp6          | 1.632617 |
| A_68_P01911888 | Chrna4        | 1.632172 |
| A_68_P02198501 | Vapb          | 1.6311   |
| A_68_P14139352 | Sall3         | 1.630361 |
| A_68_P05016628 | Gata2         | 1.6299   |
| A_68_P14217829 | Klf9          | 1.629731 |
| A_68_P00972983 | Pdcl3         | 1.629669 |

|                |                           |          |
|----------------|---------------------------|----------|
| A_68_P03746953 | Akr1a4                    | 1.62947  |
| A_68_P09005238 | Hoxb1                     | 1.629429 |
| A_68_P07978338 | Thsd4                     | 1.628728 |
| A_68_P13992999 | Pcdhgb2                   | 1.628373 |
| A_68_P14073891 | Neto1                     | 1.628304 |
| A_68_P12795932 | Es2el                     | 1.627915 |
| A_68_P06139805 | Sae2                      | 1.627884 |
| A_68_P08835415 | Onecut3                   | 1.626205 |
| A_68_P01772847 | Ypel4                     | 1.626205 |
| A_68_P06975483 | Gpr124                    | 1.625469 |
| A_68_P13637118 | Dpysl3                    | 1.625419 |
| A_68_P13465611 | Cbs                       | 1.625031 |
| A_68_P04460565 | Sh2b3                     | 1.624596 |
| A_68_P08698894 | Bclaf1                    | 1.62414  |
| A_68_P09525412 | Hes7                      | 1.624122 |
| A_68_P02032707 | Prpf40a                   | 1.623532 |
| A_68_P10198482 | Akt1                      | 1.623017 |
| A_68_P11246048 | Fgf17                     | 1.622765 |
| A_68_P08459023 | Nrbf2                     | 1.621846 |
| A_68_P00119253 | B4galt3                   | 1.620203 |
| A_68_P03666104 | Mrto4                     | 1.619213 |
| A_68_P03864879 | Toe1                      | 1.618965 |
| A_68_P03912404 | Aqp7                      | 1.618678 |
| A_68_P09650324 | Cabp7                     | 1.618492 |
| A_68_P10492549 | Ippk                      | 1.618467 |
| A_68_P12638261 | Pcqap                     | 1.618384 |
| A_68_P13253297 | ENSMUST00000083557.1:-775 | 1.618059 |
| A_68_P08023924 | Smad6                     | 1.617739 |
| A_68_P09637312 | Ulk2                      | 1.617675 |
| A_68_P03291536 | Pdpm                      | 1.61758  |
| A_68_P09586180 | Trim65                    | 1.617272 |
| A_68_P14936994 | Gata1                     | 1.617187 |
| A_68_P12599275 | Etv5                      | 1.617063 |
| A_68_P14356799 | Dmrt2                     | 1.616948 |
| A_68_P14204143 | Hspa12a                   | 1.616443 |

|                |               |          |
|----------------|---------------|----------|
| A_68_P09726526 | Ceng1         | 1.616104 |
| A_68_P09369752 | Ndel1         | 1.615859 |
| A_68_P11205877 | Zfp503        | 1.61576  |
| A_68_P01570529 | Hoxd3         | 1.615424 |
| A_68_P03215971 | Zswim5        | 1.615338 |
| A_68_P02555897 | Mcl1          | 1.615005 |
| A_68_P13535883 | Mapk13        | 1.614586 |
| A_68_P01075332 | Nmur1         | 1.614558 |
| A_68_P09522952 | Nol11         | 1.613945 |
| A_68_P08398844 | BC030440      | 1.6134   |
| A_68_P04316595 | Tesc          | 1.6129   |
| A_68_P05117018 | Igf2bp3       | 1.612398 |
| A_68_P03334643 | Npr2          | 1.611692 |
| A_68_P04570465 | Nptx2         | 1.61121  |
| A_68_P04005930 | 9630013D21Rik | 1.611127 |
| A_68_P09883093 | Clmn          | 1.610729 |
| A_68_P04834757 | Cutl1         | 1.61044  |
| A_68_P03953505 | Ppp1r8        | 1.6102   |
| A_68_P09962049 | Nfkbia        | 1.610103 |
| A_68_P04373781 | Pcdh7         | 1.609632 |
| A_68_P07199454 | Ctcf          | 1.609209 |
| A_68_P02947753 | Spg20         | 1.60909  |
| A_68_P00488035 | Clk1          | 1.608924 |
| A_68_P08433555 | Atcay         | 1.608457 |
| A_68_P04693611 | 9130213B05Rik | 1.608011 |
| A_68_P08046867 | Usp2          | 1.607949 |
| A_68_P13324804 | Chd1          | 1.607718 |
| A_68_P11613508 | Kctd12        | 1.60769  |
| A_68_P14255652 | Cybas3        | 1.607688 |
| A_68_P12730420 | Igf2bp2       | 1.607412 |
| A_68_P03666104 | Mrto4         | 1.606922 |
| A_68_P11916196 | Ttc33         | 1.606194 |
| A_68_P01538815 | D2Ert435e     | 1.605691 |
| A_68_P12215542 | Parvb         | 1.605679 |
| A_68_P05891012 | 2400001E08Rik | 1.605029 |

|                |                       |          |
|----------------|-----------------------|----------|
| A_68_P03222015 | Prdm16                | 1.604969 |
| A_68_P06026485 | St8sia2               | 1.604493 |
| A_68_P11113445 | Ranbp9                | 1.604118 |
| A_68_P03917465 | Foxd2                 | 1.603335 |
| A_68_P10961798 | Gpbp1                 | 1.602758 |
| A_68_P03909943 | Arid1a                | 1.602169 |
| A_68_P09065321 | Nfe2l1                | 1.601599 |
| A_68_P09477576 | Vamp2                 | 1.601511 |
| A_68_P04836511 | Bcl7a                 | 1.601459 |
| A_68_P05885283 | Kctd15                | 1.601459 |
| A_68_P07422084 | Tmco7                 | 1.600974 |
| A_68_P12138298 | Gsdmde1               | 1.600806 |
| A_68_P07728979 | Snf1lk2               | 1.60077  |
| A_68_P06289528 | Clns1a                | 1.600467 |
| A_68_P06674043 | Large                 | 1.600086 |
| A_68_P12788633 | Tmem41a               | 1.599571 |
| A_68_P04824992 | Gtf3c2                | 1.598878 |
| A_68_P14186183 | Ccdc87                | 1.598783 |
| A_68_P07623655 | Pou2f3                | 1.598781 |
| A_68_P00339676 | Ctdsp1                | 1.597805 |
| A_68_P02791087 | Acadm                 | 1.597704 |
| A_68_P07217678 | Mmp15                 | 1.597658 |
| A_68_P09296637 | Mgat4b                | 1.597529 |
| A_68_P13227104 | Snf1lk                | 1.597192 |
| A_68_P01836800 | A130092J06Rik-Ppapdc3 | 1.596842 |
| A_68_P01129968 | Bivm                  | 1.596706 |
| A_68_P03169150 | Mcoln2                | 1.59647  |
| A_68_P05078221 | Mrpl53                | 1.596401 |
| A_68_P08088647 | Pvrl1                 | 1.596354 |
| A_68_P03093935 | Prpf38b               | 1.59629  |
| A_68_P06832469 | Junb                  | 1.595502 |
| A_68_P11739634 | Gata4                 | 1.595147 |
| A_68_P04306177 | Crcp                  | 1.595028 |
| A_68_P11896312 | Sp1                   | 1.594245 |
| A_68_P07966190 | Slc44a2               | 1.593817 |



|                |                |          |
|----------------|----------------|----------|
| A_68_P12462766 | Top1mt         | 1.592435 |
| A_68_P03935395 | Aqp3           | 1.592223 |
| A_68_P12731974 | Wrb            | 1.59168  |
| A_68_P00343608 | Tmeff2         | 1.590867 |
| A_68_P04964381 | Cabp1          | 1.590723 |
| A_68_P06686368 | Il15           | 1.590254 |
| A_68_P07351554 | Ndufa13        | 1.590137 |
| A_68_P09203526 | Spnb2          | 1.590009 |
| A_68_P00677413 | Lmod1          | 1.589942 |
| A_68_P05744313 | Mrps33         | 1.589857 |
| A_68_P05827700 | Hoxa10         | 1.588593 |
| A_68_P10256062 | Map4k5         | 1.58856  |
| A_68_P05059002 | 5730419I09Rik  | 1.588248 |
| A_68_P01678630 | Acss1          | 1.588027 |
| A_68_P09320905 | 1810046J19Rik  | 1.587833 |
| A_68_P11875450 | A_68_P11875450 | 1.587818 |
| A_68_P11760124 | Tssk4          | 1.58776  |
| A_68_P06912647 | Lpl            | 1.587527 |
| A_68_P09341975 | Slfn8          | 1.587394 |
| A_68_P02662675 | Rap2b          | 1.587359 |
| A_68_P10346375 | Six1           | 1.587182 |
| A_68_P04609970 | B3bp           | 1.586684 |
| A_68_P08365472 | Mbc2           | 1.58658  |
| A_68_P07941290 | Ttc12          | 1.585867 |
| A_68_P12584231 | Adamts5        | 1.585856 |
| A_68_P13465706 | Caskin1        | 1.585567 |
| A_68_P01808464 | Pcsk2          | 1.585498 |
| A_68_P14495742 | Slc18a2        | 1.585071 |
| A_68_P13855404 | BC031181       | 1.584546 |
| A_68_P06464175 | Dgat2          | 1.584464 |
| A_68_P09501340 | 0610025P10Rik  | 1.584347 |
| A_68_P07958990 | A_68_P07958990 | 1.583632 |
| A_68_P06052133 | Unc45a-Hddc3   | 1.583581 |
| A_68_P02581370 | Wnt2b          | 1.583111 |
| A_68_P08084541 | 4933406E20Rik  | 1.582515 |

|                |                            |          |
|----------------|----------------------------|----------|
| A_68_P12793055 | ENSMUST00000083515.1:-5650 | 1.581937 |
| A_68_P09312885 | Mnt                        | 1.581936 |
| A_68_P04751677 | Sparcl1                    | 1.581473 |
| A_68_P01924968 | Freq                       | 1.581218 |
| A_68_P13393953 | Slc25a27-Cyp39a1           | 1.580973 |
| A_68_P07600764 | Higd1a                     | 1.580316 |
| A_68_P11363422 | Pcdh8                      | 1.580153 |
| A_68_P04286510 | Pebp1                      | 1.580023 |
| A_68_P00119249 | B4galt3                    | 1.578837 |
| A_68_P06120468 | Nkx6-2                     | 1.578799 |
| A_68_P08569765 | Mdm1                       | 1.578612 |
| A_68_P02499753 | Rap1gds1                   | 1.577044 |
| A_68_P03888598 | Slc25a33                   | 1.575797 |
| A_68_P05623653 | Hoxa6                      | 1.575652 |
| A_68_P05005487 | Snca                       | 1.575429 |
| A_68_P06461192 | Mrps12                     | 1.575194 |
| A_68_P08347279 | Chst3                      | 1.574883 |
| A_68_P09031067 | Azi1                       | 1.574773 |
| A_68_P11518015 | Lgi3                       | 1.574769 |
| A_68_P13654284 | Impact                     | 1.574452 |
| A_68_P07114791 | Cyld                       | 1.574371 |
| A_68_P05583186 | Tgfa                       | 1.573982 |
| A_68_P03555259 | Cdkn2a                     | 1.573917 |
| A_68_P07037628 | Gse1                       | 1.573917 |
| A_68_P08873702 | Pwp1                       | 1.573553 |
| A_68_P12298724 | Npr3                       | 1.573441 |
| A_68_P08156833 | D630004A14Rik              | 1.573226 |
| A_68_P12989636 | Rogdi                      | 1.572532 |
| A_68_P15169386 | G6pdx                      | 1.572365 |
| A_68_P11173760 | Efs-Il25                   | 1.572289 |
| A_68_P08312291 | Tfam                       | 1.571612 |
| A_68_P00918692 | 2310035C23Rik              | 1.571385 |
| A_68_P02434633 | Il7                        | 1.571314 |
| A_68_P12204111 | Derl1                      | 1.571114 |
| A_68_P13483729 | Cdc5l                      | 1.570945 |

|                |                             |          |
|----------------|-----------------------------|----------|
| A_68_P12241657 | Plec1                       | 1.570196 |
| A_68_P05741964 | Mkln1                       | 1.570115 |
| A_68_P08513385 | Slc35d3                     | 1.569858 |
| A_68_P00151559 | Rcor3                       | 1.569451 |
| A_68_P14230217 | Mus81-Cfl1                  | 1.569397 |
| A_68_P03944448 | Ppap2b                      | 1.56938  |
| A_68_P04697714 | Tcf1                        | 1.569312 |
| A_68_P06953539 | Homer3                      | 1.568684 |
| A_68_P13205297 | Cyp1b1                      | 1.568284 |
| A_68_P02721475 | Ampd2                       | 1.567963 |
| A_68_P00184086 | C130074G19Rik               | 1.566469 |
| A_68_P06491197 | Btbd10                      | 1.566154 |
| A_68_P07666902 | Calml4                      | 1.566102 |
| A_68_P02133861 | Plxdc2                      | 1.56601  |
| A_68_P10073346 | Mark3                       | 1.565744 |
| A_68_P09012371 | Arf1                        | 1.565734 |
| A_68_P13496133 | BC052484                    | 1.56558  |
| A_68_P02035368 | Rnd3                        | 1.565499 |
| A_68_P04987277 | Lhx5                        | 1.565271 |
| A_68_P07217865 | Dpep1                       | 1.565167 |
| A_68_P00531572 | Otos                        | 1.564629 |
| A_68_P04362592 | Rufy3                       | 1.564574 |
| A_68_P10202509 | Aldh6a1                     | 1.564367 |
| A_68_P08153393 | Lars2                       | 1.564274 |
| A_68_P07524547 | Ppmlm                       | 1.564195 |
| A_68_P08862608 | Sgpl1                       | 1.564169 |
| A_68_P06388543 | Fgf21                       | 1.564111 |
| A_68_P01418075 | Zfp334                      | 1.564082 |
| A_68_P03452599 | Stx17                       | 1.563385 |
| A_68_P05605215 | Bcat1                       | 1.563257 |
| A_68_P06012484 | 2610207I05Rik-4930583K01Rik | 1.563178 |
| A_68_P03733795 | Tcfap2e                     | 1.563101 |
| A_68_P02394230 | Skil                        | 1.563073 |
| A_68_P03260050 | Fblim1                      | 1.562991 |
| A_68_P09090040 | Cep68                       | 1.562771 |

|                |               |          |
|----------------|---------------|----------|
| A_68_P05752699 | Impdh1        | 1.562264 |
| A_68_P14147594 | Tcirl1        | 1.561991 |
| A_68_P05548217 | Chd4          | 1.561694 |
| A_68_P03909943 | Arid1a        | 1.561661 |
| A_68_P04491196 | Uncx4.1       | 1.561354 |
| A_68_P09090854 | Slc16a6       | 1.56134  |
| A_68_P14440236 | Rad9          | 1.560908 |
| A_68_P06069474 | Wnt11         | 1.560818 |
| A_68_P08436624 | D630029K05Rik | 1.560619 |
| A_68_P05285116 | Cpa2          | 1.560094 |
| A_68_P10712042 | Ubqln1        | 1.559997 |
| A_68_P01273189 | Sulf2         | 1.559526 |
| A_68_P03301122 | Galnt12       | 1.559034 |
| A_68_P01564392 | Nek6          | 1.558544 |
| A_68_P10856510 | Barx1         | 1.558298 |
| A_68_P12273277 | Acvrl1        | 1.558236 |
| A_68_P12052843 | AW549877      | 1.557381 |
| A_68_P05118396 | Cecr6         | 1.557115 |
| A_68_P14393451 | Ndufb8        | 1.556982 |
| A_68_P13113749 | BC038613      | 1.556752 |
| A_68_P01159156 | Ssfa2         | 1.556435 |
| A_68_P00908136 | Sumo1         | 1.555732 |
| A_68_P14830739 | Gnl3l         | 1.555556 |
| A_68_P05123647 | Edem1         | 1.555388 |
| A_68_P08037587 | Atg4d         | 1.555081 |
| A_68_P03184042 | Rnf13         | 1.555029 |
| A_68_P04707007 | Ars2          | 1.554576 |
| A_68_P11665627 | Zfhx2         | 1.554289 |
| A_68_P05934093 | Eef2k         | 1.554169 |
| A_68_P04008295 | AU022252      | 1.554017 |
| A_68_P02215529 | Fkbp1a        | 1.553938 |
| A_68_P08649148 | Stk11         | 1.553566 |
| A_68_P12246610 | Myo10         | 1.553134 |
| A_68_P04306177 | Crcp          | 1.551441 |
| A_68_P03487933 | Gpr3          | 1.55131  |

|                |                            |          |
|----------------|----------------------------|----------|
| A_68_P06767570 | AI427515                   | 1.550907 |
| A_68_P14274323 | Xpnpep1                    | 1.550768 |
| A_68_P07909993 | Elavl3                     | 1.550438 |
| A_68_P05322140 | 2010012C16Rik              | 1.550313 |
| A_68_P11309177 | Fndc3a                     | 1.550136 |
| A_68_P08174150 | Cox5a                      | 1.549866 |
| A_68_P13182112 | Metrn                      | 1.549658 |
| A_68_P03291536 | Pdpm                       | 1.54951  |
| A_68_P01709615 | A930018P22Rik              | 1.549397 |
| A_68_P07775665 | Sesn3                      | 1.548598 |
| A_68_P14343355 | Map3k11                    | 1.548395 |
| A_68_P06552129 | Arntl                      | 1.548385 |
| A_68_P03896383 | Prdm16                     | 1.547628 |
| A_68_P13271863 | Gtf2h4                     | 1.547197 |
| A_68_P01878753 | C1ql3                      | 1.546016 |
| A_68_P12264171 | Smug1                      | 1.545662 |
| A_68_P07758038 | Tex264                     | 1.545338 |
| A_68_P11726164 | Wdfy2                      | 1.544784 |
| A_68_P04008295 | AU022252                   | 1.544434 |
| A_68_P12273274 | Acvrl1                     | 1.543698 |
| A_68_P02452298 | Lxn                        | 1.543559 |
| A_68_P09101677 | Spred2                     | 1.54354  |
| A_68_P08715487 | Cd24a                      | 1.543471 |
| A_68_P14674677 | Tmem32                     | 1.543402 |
| A_68_P00317108 | Cxcr4                      | 1.543019 |
| A_68_P08096900 | Pias1                      | 1.543    |
| A_68_P02764946 | Tbplxr1                    | 1.542878 |
| A_68_P09718190 | Sphk1                      | 1.54266  |
| A_68_P05179389 | ENSMUST00000083652.1:-5555 | 1.54237  |
| A_68_P14280238 | Pik3ap1                    | 1.542338 |
| A_68_P02990496 | Pitx2                      | 1.540433 |
| A_68_P08965912 | Adora2a                    | 1.540299 |
| A_68_P12500587 | Hira                       | 1.540134 |
| A_68_P12359376 | AK162044                   | 1.540092 |
| A_68_P00138859 | Hibch                      | 1.540076 |

|                |                        |          |
|----------------|------------------------|----------|
| A_68_P12959248 | Mrpl39                 | 1.539564 |
| A_68_P04987280 | Lhx5                   | 1.539328 |
| A_68_P07916100 | AY074887               | 1.538912 |
| A_68_P02501934 | 4930504E06Rik          | 1.538333 |
| A_68_P04736305 | Znhit1                 | 1.537835 |
| A_68_P09443620 | Tcf7                   | 1.53776  |
| A_68_P07212645 | Zfp330                 | 1.537736 |
| A_68_P13150354 | Lbh                    | 1.537664 |
| A_68_P14335838 | Psat1                  | 1.537478 |
| A_68_P09987994 | Pomc1                  | 1.537178 |
| A_68_P05804599 | Mrpl19                 | 1.537131 |
| A_68_P06313338 | Spon1                  | 1.536538 |
| A_68_P01201038 | Casc4                  | 1.536403 |
| A_68_P00337663 | Xkr4                   | 1.535925 |
| A_68_P15221797 | Rps4x                  | 1.535719 |
| A_68_P06450771 | Saa4                   | 1.534994 |
| A_68_P03439013 | 2810432D09Rik          | 1.534752 |
| A_68_P03302039 | Igsf21                 | 1.534275 |
| A_68_P05869378 | Ncapd2-Mrpl51          | 1.534078 |
| A_68_P15121231 | Trappc2                | 1.534042 |
| A_68_P12108244 | Hoxc10                 | 1.533999 |
| A_68_P13223886 | Shd                    | 1.533886 |
| A_68_P05907582 | 2700078K21Rik          | 1.533686 |
| A_68_P00456627 | Nck2                   | 1.533365 |
| A_68_P07467132 | Slc38a3                | 1.533338 |
| A_68_P01105977 | Stat1                  | 1.533201 |
| A_68_P00904706 | 1810031K17Rik-BC038286 | 1.531932 |
| A_68_P13186447 | Kcnk12                 | 1.531575 |
| A_68_P01469068 | Tcfap2c                | 1.531441 |
| A_68_P03296663 | Rnf38                  | 1.530945 |
| A_68_P01714764 | Dnajc17                | 1.530897 |
| A_68_P02917066 | Gstm5                  | 1.530772 |
| A_68_P12048926 | Plec1                  | 1.530728 |
| A_68_P14230211 | Mus81-Cfl1             | 1.530032 |
| A_68_P09264439 | Srebf1                 | 1.529813 |

|                |                        |          |
|----------------|------------------------|----------|
| A_68_P09369743 | Ndel1                  | 1.52925  |
| A_68_P00766098 | BC031781               | 1.52903  |
| A_68_P13415565 | Sepx1                  | 1.528663 |
| A_68_P10987290 | Sdccag10-3110031B13Rik | 1.528334 |
| A_68_P10157510 | A_68_P10157510         | 1.528278 |
| A_68_P09357796 | Rara                   | 1.527757 |
| A_68_P13119759 | Nkx2-5                 | 1.527748 |
| A_68_P00740581 | Fzd5                   | 1.527718 |
| A_68_P09574736 | Sdf2                   | 1.527632 |
| A_68_P10975508 | Gmnn                   | 1.527299 |
| A_68_P00327181 | Lemd1                  | 1.527265 |
| A_68_P07935522 | Sin3a                  | 1.527051 |
| A_68_P02024644 | D030051N19Rik          | 1.526902 |
| A_68_P12909205 | Lmln                   | 1.526883 |
| A_68_P03569937 | Psip1                  | 1.52664  |
| A_68_P04884115 | Scfd2                  | 1.526019 |
| A_68_P08435476 | Sf3b5                  | 1.525375 |
| A_68_P07441605 | Cotl1                  | 1.525314 |
| A_68_P12854744 | Adamts5                | 1.524922 |
| A_68_P04663164 | Fbxl13                 | 1.523935 |
| A_68_P14327516 | Kcnk4                  | 1.523671 |
| A_68_P05272167 | Igf2bp3                | 1.523323 |
| A_68_P14350147 | Gfra1                  | 1.522771 |
| A_68_P04851548 | Lhx5                   | 1.522571 |
| A_68_P06994522 | Bst2                   | 1.522341 |
| A_68_P00366170 | 1110034B05Rik          | 1.522251 |
| A_68_P08841141 | Ela2                   | 1.52198  |
| A_68_P09457498 | Acbd4                  | 1.521932 |
| A_68_P01075518 | Wnt6                   | 1.521848 |
| A_68_P04148375 | Tmed5                  | 1.521785 |
| A_68_P09531764 | Dlx4                   | 1.521754 |
| A_68_P13626996 | Spry4                  | 1.521536 |
| A_68_P12745246 | Parn                   | 1.52144  |
| A_68_P13409935 | Wtap                   | 1.520456 |
| A_68_P06025177 | Mesdc1                 | 1.520406 |

|                |                |          |
|----------------|----------------|----------|
| A_68_P08949147 | Rassf3         | 1.519627 |
| A_68_P09185579 | Mmd            | 1.519598 |
| A_68_P10223655 | Acot4          | 1.519111 |
| A_68_P06788637 | BC021891       | 1.519032 |
| A_68_P09794243 | A_68_P09794243 | 1.518623 |
| A_68_P00122991 | Rnpep          | 1.518313 |
| A_68_P09264452 | Srebfl         | 1.517881 |
| A_68_P12600283 | Pcyt1a         | 1.517737 |
| A_68_P10699085 | Sox4           | 1.517668 |
| A_68_P12707523 | Chrd           | 1.5176   |
| A_68_P03584386 | Bmp8b          | 1.51753  |
| A_68_P00552426 | Dst            | 1.517067 |
| A_68_P08629718 | B530045E10Rik  | 1.516672 |
| A_68_P01137526 | Niban          | 1.516635 |
| A_68_P13992903 | Gata6          | 1.51656  |
| A_68_P00919787 | Cd55           | 1.516467 |
| A_68_P04339270 | Tbx3           | 1.516363 |
| A_68_P10735499 | Txndc5         | 1.516041 |
| A_68_P02258880 | Gm561          | 1.515669 |
| A_68_P01697623 | Pbx3           | 1.515588 |
| A_68_P00564995 | Slc35f5        | 1.515539 |
| A_68_P04930233 | Rbm19          | 1.51503  |
| A_68_P03296663 | Rnf38          | 1.514947 |
| A_68_P08523385 | Smpd2          | 1.514766 |
| A_68_P15097287 | Mllt7          | 1.514609 |
| A_68_P14142999 | Smarca2        | 1.514315 |
| A_68_P03843625 | BC025833       | 1.514303 |
| A_68_P02097439 | Ptgis          | 1.513848 |
| A_68_P12600716 | Tiam1          | 1.513782 |
| A_68_P09516342 | Cdc27          | 1.513736 |
| A_68_P01928464 | Gm996          | 1.513504 |
| A_68_P06458345 | Sphk2          | 1.512936 |
| A_68_P11331189 | LOC432870      | 1.512829 |
| A_68_P03630129 | Thap3          | 1.512578 |
| A_68_P08085317 | Map2k5         | 1.512523 |



|                |                      |          |
|----------------|----------------------|----------|
| A_68_P07684876 | Tgm4                 | 1.512148 |
| A_68_P12039466 | D15Mgi27             | 1.511971 |
| A_68_P07809628 | Eef1a1               | 1.511496 |
| A_68_P07804980 | Pde4a                | 1.511336 |
| A_68_P05591071 | Pcbp1                | 1.510991 |
| A_68_P09343920 | BC030477             | 1.510702 |
| A_68_P05822231 | 9630033F20Rik        | 1.510661 |
| A_68_P13441074 | Pacsin1              | 1.510282 |
| A_68_P13134961 | Tnfrsf21             | 1.509398 |
| A_68_P06343664 | Plekhg2              | 1.508641 |
| A_68_P08999296 | Wfikkn2              | 1.507785 |
| A_68_P00906169 | Cxcr7                | 1.507453 |
| A_68_P06801217 | Cc2d1a-4930432K21Rik | 1.507074 |
| A_68_P09016819 | Pcgf2                | 1.507023 |
| A_68_P07588982 | Birc3                | 1.506965 |
| A_68_P10421818 | Sdc1                 | 1.506705 |
| A_68_P06358264 | Slco3a1              | 1.506527 |
| A_68_P13341641 | Zdhhc14              | 1.50636  |
| A_68_P07578379 | Pknox2               | 1.504865 |
| A_68_P09661960 | Sphk1                | 1.504856 |
| A_68_P06832423 | Junb                 | 1.504807 |
| A_68_P13531990 | Nubp2-Spsb3          | 1.504122 |
| A_68_P03465779 | Cdc20                | 1.502719 |
| A_68_P13480940 | Rgmb                 | 1.502597 |
| A_68_P08531609 | Mtap7                | 1.502358 |
| A_68_P04270189 | C230008H04Rik        | 1.502254 |
| A_68_P06531397 | Suv420h2             | 1.502048 |
| A_68_P11915780 | Foxred2              | 1.501899 |
| A_68_P00225463 | Lamc2                | 1.501839 |
| A_68_P10411213 | Atxn7l4              | 1.50122  |
| A_68_P04498604 | Rnf34                | 1.501122 |
| A_68_P07563562 | Igsf4a               | 1.500649 |
| A_68_P10402489 | Slc25a29             | 1.500519 |
| A_68_P13559195 | Polh-Xpo5            | 1.500488 |
| A_68_P10729669 | Homer1               | 1.500433 |

|                |                |          |
|----------------|----------------|----------|
| A_68_P05534706 | Lsm5           | 1.50035  |
| A_68_P14263584 | Foxb2          | 1.500345 |
| A_68_P06105632 | Cckbr          | 1.500108 |
| A_68_P06035699 | Plekhf1        | 1.499921 |
| A_68_P04492972 | Katnal1        | 1.499738 |
| A_68_P11607346 | Nefl           | 1.499354 |
| A_68_P06031404 | 6330408A02Rik  | 1.499199 |
| A_68_P13507114 | Ccdc128        | 1.499033 |
| A_68_P07860056 | Bace1          | 1.498133 |
| A_68_P11019732 | Ddx41          | 1.498056 |
| A_68_P08265273 | Klf16          | 1.498033 |
| A_68_P07954586 | Epor           | 1.497437 |
| A_68_P00396256 | Hhat           | 1.49735  |
| A_68_P00251563 | Uap1           | 1.497242 |
| A_68_P06678689 | Xkr5           | 1.496959 |
| A_68_P15160897 | Phf6           | 1.496571 |
| A_68_P02695523 | A_68_P02695523 | 1.496302 |
| A_68_P14097615 | 2010001M09Rik  | 1.495671 |
| A_68_P01516077 | Trim69         | 1.495562 |
| A_68_P07955121 | Tmem158        | 1.495359 |
| A_68_P07060963 | Zdhhc7         | 1.494905 |
| A_68_P03693215 | Zfp593         | 1.494683 |
| A_68_P02317489 | Hapln2-Gpatc4  | 1.49438  |
| A_68_P02323952 | Car3           | 1.494319 |
| A_68_P06394783 | Ube3a          | 1.494194 |
| A_68_P01342780 | Ccb11          | 1.494124 |
| A_68_P03810512 | Zcchc7         | 1.494072 |
| A_68_P13106799 | Tulp1          | 1.493619 |
| A_68_P09156463 | Ppp1r1b        | 1.493382 |
| A_68_P10129077 | Ppp1r13b       | 1.493168 |
| A_68_P14231112 | Rps6kb2        | 1.492229 |
| A_68_P11040896 | Peci           | 1.491913 |
| A_68_P08275638 | Rfx4           | 1.491595 |
| A_68_P00469149 | Col5a2         | 1.491462 |
| A_68_P13309401 | Pbx2           | 1.491351 |

|                |               |          |
|----------------|---------------|----------|
| A_68_P09453654 | Lsm12         | 1.490502 |
| A_68_P05806684 | Hoxa5         | 1.490446 |
| A_68_P00780454 | 4930418G15Rik | 1.490379 |
| A_68_P05951991 | Bub3          | 1.490217 |
| A_68_P07487469 | Cyb561d2      | 1.490214 |
| A_68_P10725065 | Elovl7        | 1.48993  |
| A_68_P14471876 | Sf3b2-Gal3st3 | 1.489361 |
| A_68_P01771855 | Snai1         | 1.489298 |
| A_68_P00761115 | 5033414K04Rik | 1.489213 |
| A_68_P07674505 | Ttk           | 1.489068 |
| A_68_P07002293 | Terf2         | 1.488294 |
| A_68_P03452599 | Stx17         | 1.488125 |
| A_68_P00251562 | Uap1          | 1.487897 |
| A_68_P03584400 | Bmp8b         | 1.487655 |
| A_68_P13579167 | Ltbp1         | 1.487613 |
| A_68_P04403143 | Sh2b2         | 1.487385 |
| A_68_P02147557 | Zfp661-Mrps5  | 1.487325 |
| A_68_P13483867 | Scube3        | 1.486997 |
| A_68_P13680548 | Rnf138        | 1.486838 |
| A_68_P08718386 | Inhbe         | 1.486021 |
| A_68_P06143975 | Gabra5        | 1.485237 |
| A_68_P13162670 | Clps          | 1.484857 |
| A_68_P14180164 | Fibp          | 1.484629 |
| A_68_P01251036 | Gfra4         | 1.484448 |
| A_68_P03836687 | 4931406I20Rik | 1.484441 |
| A_68_P03262673 | Inadl         | 1.484427 |
| A_68_P02612003 | Hist2h4       | 1.484379 |
| A_68_P07396318 | Asf1b         | 1.483937 |
| A_68_P10130463 | Pum2          | 1.483497 |
| A_68_P14349190 | Stip1         | 1.483414 |
| A_68_P02032727 | Arl6ip6       | 1.483347 |
| A_68_P11078517 | Hcn1          | 1.483242 |
| A_68_P02221118 | Lmx1b         | 1.48294  |
| A_68_P09104779 | Slfn9         | 1.482459 |
| A_68_P03831176 | Cyp2j6        | 1.482146 |

|                |               |          |
|----------------|---------------|----------|
| A_68_P06343665 | Plekhg2       | 1.481991 |
| A_68_P07506787 | Cck           | 1.481753 |
| A_68_P02419945 | 3110050N22Rik | 1.48163  |
| A_68_P00719162 | Cnih3         | 1.481614 |
| A_68_P04000868 | Rnf207-Rpl22  | 1.48097  |
| A_68_P14063148 | Cxxc5         | 1.48086  |
| A_68_P01661943 | Phf21a        | 1.480679 |
| A_68_P14256498 | Entpd7        | 1.480529 |
| A_68_P10347410 | Pax9          | 1.480418 |
| A_68_P09037026 | Skp1a         | 1.480285 |
| A_68_P09372157 | Wnk4          | 1.480105 |
| A_68_P13535873 | Mapk13        | 1.479972 |
| A_68_P12438489 | Sfrs2ip       | 1.479931 |
| A_68_P00327187 | Lemd1         | 1.47945  |
| A_68_P05447286 | Rpn1          | 1.479346 |
| A_68_P03474571 | Lepr          | 1.479289 |
| A_68_P01671416 | Zfp313        | 1.478437 |
| A_68_P08191867 | Ncam1         | 1.478418 |
| A_68_P02951670 | Gbp6          | 1.478209 |
| A_68_P06242540 | 6330503K22Rik | 1.478056 |
| A_68_P07262444 | Aytl1         | 1.477903 |
| A_68_P09726298 | Coil          | 1.477663 |
| A_68_P08860783 | Olig3         | 1.477511 |
| A_68_P14151854 | Nudt8         | 1.477429 |
| A_68_P02183976 | Scand1        | 1.477376 |
| A_68_P02465746 | Ddit4l        | 1.477143 |
| A_68_P02323477 | Zfp687        | 1.477138 |
| A_68_P08778842 | Gja1          | 1.477079 |
| A_68_P04090888 | D4Wsu114e     | 1.476955 |
| A_68_P09568749 | Ube2b-Cdkl3   | 1.476486 |
| A_68_P12309980 | Aqp5          | 1.476209 |
| A_68_P10618183 | Zbed3         | 1.476159 |
| A_68_P13486289 | Clic5         | 1.475956 |
| A_68_P03584400 | Bmp8b         | 1.47563  |
| A_68_P12802648 | Runx1         | 1.475285 |

|                |                     |          |
|----------------|---------------------|----------|
| A_68_P11042649 | Ocln                | 1.47515  |
| A_68_P09096199 | Mtmr4               | 1.474907 |
| A_68_P03763133 | Bach2               | 1.474846 |
| A_68_P03305240 | Foxo6               | 1.4748   |
| A_68_P13656495 | Snrpd1              | 1.474793 |
| A_68_P02504418 | Tpd52               | 1.474269 |
| A_68_P13351558 | Vav1                | 1.474169 |
| A_68_P13565034 | Stk38               | 1.474038 |
| A_68_P07203069 | Trmt1               | 1.474036 |
| A_68_P08612636 | Fabp7               | 1.473532 |
| A_68_P04306515 | Alkbh2-Ung          | 1.473504 |
| A_68_P12202882 | Grasp               | 1.473474 |
| A_68_P06115755 | Cacng3              | 1.473257 |
| A_68_P05298275 | Reep1               | 1.473199 |
| A_68_P14953861 | Rps6ka3             | 1.472322 |
| A_68_P03963161 | Pou3f1              | 1.47184  |
| A_68_P15028309 | Eif2s3x             | 1.47183  |
| A_68_P03041117 | Sfrp2               | 1.471285 |
| A_68_P07512483 | Dync1l1             | 1.4712   |
| A_68_P01582652 | E130319B15Rik       | 1.471146 |
| A_68_P14597653 | Acot9               | 1.470794 |
| A_68_P10658758 | Cartpt              | 1.470786 |
| A_68_P00857131 | Mapkapk2            | 1.47076  |
| A_68_P12362731 | Mfsd3               | 1.47069  |
| A_68_P11132693 | Ppp3cc              | 1.470398 |
| A_68_P09123103 | Pfn1                | 1.47027  |
| A_68_P02740608 | 6330569M22Rik       | 1.470231 |
| A_68_P07671679 | Rbm5                | 1.469897 |
| A_68_P09395677 | 1700007I06Rik-Stk10 | 1.469867 |
| A_68_P02376979 | Gipc2               | 1.468784 |
| A_68_P09433951 | 0610009B22Rik       | 1.468724 |
| A_68_P05252248 | Chchd3              | 1.4687   |
| A_68_P06163071 | Abhd2               | 1.468599 |
| A_68_P03912425 | Aqp7                | 1.468333 |
| A_68_P03831176 | Cyp2j6              | 1.468287 |

|                |                            |          |
|----------------|----------------------------|----------|
| A_68_P02744224 | Nola1-Cfi                  | 1.468108 |
| A_68_P08917433 | Cdc2a                      | 1.468044 |
| A_68_P07138739 | Mcph1                      | 1.467861 |
| A_68_P15121373 | Phf8                       | 1.46757  |
| A_68_P09732812 | Pitpna                     | 1.467463 |
| A_68_P09816159 | Bcl11b                     | 1.467092 |
| A_68_P07264824 | Cbfb                       | 1.467032 |
| A_68_P09332948 | Plekhm1                    | 1.466902 |
| A_68_P12886769 | Ranbp1                     | 1.466565 |
| A_68_P09451674 | Dnajc7-Nkiras2             | 1.466286 |
| A_68_P05244196 | ENSMUST00000083652.1:-3959 | 1.466144 |
| A_68_P13596914 | Gypc                       | 1.46608  |
| A_68_P01347361 | Foxa2                      | 1.465924 |
| A_68_P05057770 | Hk2                        | 1.465192 |
| A_68_P10419775 | Chx10                      | 1.465077 |
| A_68_P08834118 | Ddit4                      | 1.465033 |
| A_68_P00387540 | Slc39a10                   | 1.464297 |
| A_68_P02033295 | Ccdc3                      | 1.464183 |
| A_68_P07256672 | Rwdd4a                     | 1.463997 |
| A_68_P07268697 | Frg1                       | 1.463972 |
| A_68_P01251863 | Notch1                     | 1.463938 |
| A_68_P05939019 | A630091E08Rik              | 1.463783 |
| A_68_P01572379 | Ntng2                      | 1.463728 |
| A_68_P13972523 | Fchsdl                     | 1.463721 |
| A_68_P01173314 | Stx16                      | 1.463388 |
| A_68_P09358813 | Limk2                      | 1.463204 |
| A_68_P08586130 | Il20ra                     | 1.463114 |
| A_68_P14645447 | Irs4                       | 1.463063 |
| A_68_P08372935 | Btbd11                     | 1.461531 |
| A_68_P06386541 | Brwd2                      | 1.461252 |
| A_68_P00540080 | Dusp23                     | 1.460988 |
| A_68_P01584320 | Dusp2                      | 1.460961 |
| A_68_P02396757 | Aadacl1                    | 1.4607   |
| A_68_P06988313 | Rspry1                     | 1.460647 |
| A_68_P09565488 | Ap2b1                      | 1.460173 |

|                |               |          |
|----------------|---------------|----------|
| A_68_P13841860 | Zbtb7c        | 1.460139 |
| A_68_P03747411 | Tesk1         | 1.460107 |
| A_68_P06349664 | Igf1r         | 1.460034 |
| A_68_P14134922 | Mbp           | 1.460011 |
| A_68_P07486322 | Map2k1        | 1.45996  |
| A_68_P07020688 | Foxf1a        | 1.459893 |
| A_68_P13426289 | Ddr1          | 1.459511 |
| A_68_P09309849 | Eppb9         | 1.45908  |
| A_68_P09065959 | 4933439F18Rik | 1.458868 |
| A_68_P06874380 | Nfat5         | 1.458791 |
| A_68_P07853625 | Rrp9          | 1.458271 |
| A_68_P07403941 | Pik3r2        | 1.45795  |
| A_68_P06841060 | Pbx4          | 1.457646 |
| A_68_P11291369 | Bin3          | 1.457387 |
| A_68_P03474931 | Eif2c4        | 1.457305 |
| A_68_P14333014 | Tmem2         | 1.457149 |
| A_68_P09838490 | 1810048J11Rik | 1.456876 |
| A_68_P07000614 | Ing1          | 1.456741 |
| A_68_P01524575 | Hspa12b       | 1.456693 |
| A_68_P01762558 | BC061194      | 1.456685 |
| A_68_P09441763 | Myh10         | 1.456194 |
| A_68_P09371327 | Rtn4r1l       | 1.455881 |
| A_68_P12864479 | Popdc2        | 1.45568  |
| A_68_P07554616 | Rbms3         | 1.455667 |
| A_68_P01695058 | Jag1          | 1.455527 |
| A_68_P14702906 | Tro           | 1.455378 |
| A_68_P09628615 | Tmem88        | 1.454875 |
| A_68_P09518146 | Pcyt2         | 1.454804 |
| A_68_P05281362 | 2610209M04Rik | 1.454659 |
| A_68_P06359553 | Strn4         | 1.454646 |
| A_68_P09387273 | Fzd2          | 1.454451 |
| A_68_P07950303 | Sh3px3        | 1.4543   |
| A_68_P09316344 | Ywhae         | 1.453931 |
| A_68_P00518747 | Optc          | 1.453686 |
| A_68_P03306890 | Creb3         | 1.453588 |

|                |               |          |
|----------------|---------------|----------|
| A_68_P06322496 | D430014M15    | 1.453439 |
| A_68_P07565640 | Tpbg          | 1.453208 |
| A_68_P09200960 | Lif           | 1.453182 |
| A_68_P12108250 | Hoxc10        | 1.452736 |
| A_68_P01179906 | D2Wsu81e      | 1.452526 |
| A_68_P00905132 | B3gnt7        | 1.452515 |
| A_68_P09021294 | Fmnl1         | 1.452287 |
| A_68_P08629726 | B530045E10Rik | 1.452204 |
| A_68_P03506214 | Foxd2         | 1.452157 |
| A_68_P05087618 | Zxdc          | 1.452084 |
| A_68_P12098583 | Prph1         | 1.451806 |
| A_68_P09666330 | Gabarap       | 1.451399 |
| A_68_P04919142 | Mlxipl        | 1.451176 |
| A_68_P09652627 | BC029169      | 1.451089 |
| A_68_P06925433 | Pllp          | 1.450475 |
| A_68_P07890285 | Axud1         | 1.450327 |
| A_68_P08866515 | Adamts15      | 1.450234 |
| A_68_P13981482 | 4930503L19Rik | 1.450204 |
| A_68_P06432034 | Rasl2-9       | 1.450058 |
| A_68_P06046622 | Ppp2r2d       | 1.45001  |
| A_68_P03505620 | E2f2          | 1.449858 |
| A_68_P05787946 | Tsga14        | 1.449594 |
| A_68_P13090912 | Telo2         | 1.449589 |
| A_68_P06658331 | Zfp715        | 1.449267 |
| A_68_P09107785 | Tcap          | 1.448968 |
| A_68_P04425904 | Wasf3         | 1.448943 |
| A_68_P01646909 | BC061194      | 1.448936 |
| A_68_P09681781 | Timp2         | 1.44769  |
| A_68_P09874616 | 1110008B24Rik | 1.44752  |
| A_68_P06323698 | Fgf21-Fut1    | 1.447293 |
| A_68_P12591564 | Slc7a4        | 1.447064 |
| A_68_P08556691 | Aldh1l2       | 1.446744 |
| A_68_P01588855 | Frmd4a        | 1.446343 |
| A_68_P00250137 | Igsf4b        | 1.446318 |
| A_68_P01979262 | Sulf2         | 1.44623  |



|                |               |          |
|----------------|---------------|----------|
| A_68_P12651924 | Ccdc54        | 1.446076 |
| A_68_P02783108 | Spata5        | 1.445896 |
| A_68_P03421233 | Dnaja1        | 1.445716 |
| A_68_P05316094 | Prdm5         | 1.445403 |
| A_68_P04003641 | Ccdc23        | 1.445205 |
| A_68_P12303095 | Wnt1          | 1.444849 |
| A_68_P00343598 | Tmeff2        | 1.444352 |
| A_68_P09711728 | Derl2-Mis12   | 1.444195 |
| A_68_P15167347 | Zrsr2         | 1.444035 |
| A_68_P06364198 | Zfp30         | 1.443779 |
| A_68_P11855311 | Slc25a32      | 1.443232 |
| A_68_P03240726 | 2510006D16Rik | 1.442897 |
| A_68_P03338370 | Dmrta2        | 1.442761 |
| A_68_P12671996 | Abcf3         | 1.442699 |
| A_68_P07776192 | Chst2         | 1.442656 |
| A_68_P00743768 | Hes6          | 1.44264  |
| A_68_P02097433 | Ptgis         | 1.442517 |
| A_68_P04792804 | Lfng          | 1.442189 |
| A_68_P04328386 | Hnrpd         | 1.442062 |
| A_68_P01361685 | Agpat2        | 1.441968 |
| A_68_P08048266 | 6230427J02Rik | 1.44193  |
| A_68_P08708146 | Lims1         | 1.441755 |
| A_68_P02167804 | Slc23a2       | 1.44171  |
| A_68_P13846585 | Dnajc18       | 1.441342 |
| A_68_P13748929 | Zadh2         | 1.441329 |
| A_68_P07754822 | Man2c1        | 1.441159 |
| A_68_P01566039 | Jag1          | 1.440769 |
| A_68_P11039471 | Irx4          | 1.440614 |
| A_68_P07196635 | Cnot7-Vps37a  | 1.440321 |
| A_68_P04203215 | Rpl9-Lias     | 1.440265 |
| A_68_P05450007 | Tra2a         | 1.440187 |
| A_68_P02264567 | C130021I20Rik | 1.440076 |
| A_68_P10122731 | Gstz1         | 1.439784 |
| A_68_P04711907 | Arl6ip4       | 1.439497 |
| A_68_P06848458 | Dnajb1        | 1.439455 |

|                |                |          |
|----------------|----------------|----------|
| A_68_P04066415 | 2510039O18Rik  | 1.439313 |
| A_68_P07559876 | Armet          | 1.439208 |
| A_68_P02058135 | Mrg1           | 1.439179 |
| A_68_P03056910 | Golph4         | 1.43892  |
| A_68_P01266404 | Pax1           | 1.438803 |
| A_68_P06431967 | Siglecf        | 1.438757 |
| A_68_P08934065 | A_68_P08934065 | 1.43868  |
| A_68_P06127842 | Cebpg          | 1.438286 |
| A_68_P09099238 | Myo1d          | 1.43806  |
| A_68_P14030415 | Etf1           | 1.43792  |
| A_68_P04824992 | Gtf3c2         | 1.437902 |
| A_68_P06776322 | Mfap3l         | 1.437779 |
| A_68_P09611938 | Havcr2         | 1.437707 |
| A_68_P11855904 | Ly6d           | 1.43687  |
| A_68_P04761495 | Sdsl-Sds       | 1.436867 |
| A_68_P07356122 | Tk2-Cklf       | 1.436484 |
| A_68_P05162900 | Zfml           | 1.436461 |
| A_68_P05979594 | Lsr-Tmem162    | 1.436362 |
| A_68_P03792681 | Yrdc           | 1.436137 |
| A_68_P03421224 | Dnaja1         | 1.436122 |
| A_68_P08089610 | 7-Sep          | 1.43594  |
| A_68_P15016311 | Ankrd58        | 1.435701 |
| A_68_P01164203 | Mcts2          | 1.435628 |
| A_68_P05925982 | Nlrp10-Eif3s5  | 1.435187 |
| A_68_P04125064 | Prom1          | 1.434219 |
| A_68_P06314101 | Myo7a          | 1.434164 |
| A_68_P15042652 | Suv39h1        | 1.433997 |
| A_68_P01248802 | Lrrc4c         | 1.433878 |
| A_68_P14209567 | Rin1           | 1.433811 |
| A_68_P12441853 | Adamts20       | 1.433802 |
| A_68_P03465775 | Cdc20          | 1.433773 |
| A_68_P11752832 | Wdhd1          | 1.433733 |
| A_68_P08999972 | Tbx21          | 1.433698 |
| A_68_P04761495 | Sdsl-Sds       | 1.433574 |
| A_68_P02221102 | Lmx1b          | 1.433491 |

|                |                         |          |
|----------------|-------------------------|----------|
| A_68_P06113111 | Foxa3                   | 1.433447 |
| A_68_P08161578 | Acpp                    | 1.43316  |
| A_68_P09434018 | Cntnap1                 | 1.433152 |
| A_68_P05689367 | 3321401G04Rik           | 1.433097 |
| A_68_P10333896 | Arl4a                   | 1.43302  |
| A_68_P11532193 | Anxa8                   | 1.432996 |
| A_68_P11790055 | Dzip1                   | 1.432954 |
| A_68_P06053964 | Prkrir                  | 1.432557 |
| A_68_P03583518 | Thrap3                  | 1.432479 |
| A_68_P07759159 | Nktr                    | 1.432346 |
| A_68_P03026052 | ENSMUST00000071298.4:28 | 1.432268 |
| A_68_P02093470 | U46068                  | 1.432252 |
| A_68_P04954999 | Lrpap1                  | 1.431922 |
| A_68_P07424653 | Ssbp4-Lrrc25            | 1.431787 |
| A_68_P09617087 | Flcn                    | 1.431358 |
| A_68_P03758436 | Arid1a                  | 1.431239 |
| A_68_P07615452 | Mst1r                   | 1.431198 |
| A_68_P12960661 | Pla1a                   | 1.431194 |
| A_68_P02263070 | Atf2                    | 1.430926 |
| A_68_P05324700 | Zyx                     | 1.430178 |
| A_68_P08629268 | Hkdc1                   | 1.430064 |
| A_68_P08139007 | Ttk                     | 1.430039 |
| A_68_P04711907 | Arl6ip4                 | 1.429977 |
| A_68_P03579116 | 1810054D07Rik           | 1.429959 |
| A_68_P02577687 | Sox2                    | 1.429481 |
| A_68_P07403939 | Pik3r2                  | 1.429434 |
| A_68_P09376940 | Slc16a3                 | 1.429149 |
| A_68_P08962443 | B4galnt1                | 1.428792 |
| A_68_P06293610 | Luzp2                   | 1.428669 |
| A_68_P14768398 | Apex2                   | 1.428666 |
| A_68_P07167615 | Brd7                    | 1.428506 |
| A_68_P04339851 | Ccde92                  | 1.428427 |
| A_68_P08907273 | A_68_P08907273          | 1.428392 |
| A_68_P14251876 | Sssca1                  | 1.42819  |
| A_68_P07615453 | Mst1r                   | 1.427854 |

|                |                        |          |
|----------------|------------------------|----------|
| A_68_P12834327 | Dlgh1                  | 1.427838 |
| A_68_P12632289 | Ece2                   | 1.427734 |
| A_68_P09002039 | Phf23                  | 1.427297 |
| A_68_P12500589 | Hira                   | 1.427205 |
| A_68_P12105096 | Aaas                   | 1.426705 |
| A_68_P09614077 | Phf12                  | 1.426606 |
| A_68_P01655397 | BC050777               | 1.426414 |
| A_68_P13875289 | Rax                    | 1.425902 |
| A_68_P11166031 | Wnt5a                  | 1.425842 |
| A_68_P10255666 | Amn                    | 1.425674 |
| A_68_P05467387 | Nol1                   | 1.425566 |
| A_68_P09736770 | Gps1                   | 1.425524 |
| A_68_P09691873 | Mdh1-AV249152          | 1.425494 |
| A_68_P09248011 | Tbx2                   | 1.425297 |
| A_68_P08176001 | Myo1e                  | 1.425015 |
| A_68_P03776130 | Rcc2                   | 1.424913 |
| A_68_P11558065 | Dhrs4                  | 1.424862 |
| A_68_P09041858 | A830091I15Rik          | 1.42481  |
| A_68_P01405674 | A730008L03Rik-BC061039 | 1.424667 |
| A_68_P10386935 | BC011209               | 1.424301 |
| A_68_P12644912 | 2310061J03Rik          | 1.423442 |
| A_68_P13483019 | Hnrp11                 | 1.423419 |
| A_68_P12636175 | Lsg1                   | 1.423195 |
| A_68_P08139005 | Ttk                    | 1.423065 |
| A_68_P12225005 | Ywhaz                  | 1.422795 |
| A_68_P07840841 | Ccp1                   | 1.422322 |
| A_68_P04005937 | 9630013D21Rik          | 1.422253 |
| A_68_P10148637 | Six1                   | 1.422095 |
| A_68_P09159717 | Trp53i13-1300007F04Rik | 1.421852 |
| A_68_P00957898 | Eif5b                  | 1.421718 |
| A_68_P12298037 | Lynx1                  | 1.421512 |
| A_68_P07154228 | 1810029B16Rik          | 1.421163 |
| A_68_P13293867 | Ppp2r5d                | 1.421144 |
| A_68_P01869763 | 2810030E01Rik-Mllt10   | 1.421027 |
| A_68_P06262218 | Six5                   | 1.420177 |

|                |                |          |
|----------------|----------------|----------|
| A_68_P06142057 | Ebf3           | 1.420161 |
| A_68_P13178495 | Rps18          | 1.420066 |
| A_68_P01288747 | Slc20a1        | 1.419961 |
| A_68_P10859845 | Prpf4b         | 1.419901 |
| A_68_P11042659 | Ocln           | 1.4198   |
| A_68_P01655861 | F730014I05Rik  | 1.419763 |
| A_68_P10419771 | Chx10          | 1.419644 |
| A_68_P09548393 | Aoc3           | 1.419406 |
| A_68_P13267892 | Tead3          | 1.419366 |
| A_68_P14667558 | Dock11         | 1.419253 |
| A_68_P01531042 | Nelf           | 1.419041 |
| A_68_P04340627 | Ung            | 1.418765 |
| A_68_P11132881 | Tkt            | 1.418734 |
| A_68_P13930307 | 8030462N17Rik  | 1.418617 |
| A_68_P01500368 | Ube2e3         | 1.418301 |
| A_68_P08250810 | Matk           | 1.418298 |
| A_68_P01256535 | Dsn1           | 1.418174 |
| A_68_P02836286 | Narg1          | 1.418167 |
| A_68_P06490200 | 2410015N17Rik  | 1.417919 |
| A_68_P10179927 | 1110034A24Rik  | 1.417652 |
| A_68_P06427461 | BC017158       | 1.417265 |
| A_68_P04862543 | Sema3a         | 1.417223 |
| A_68_P06652577 | Shkbp1         | 1.417097 |
| A_68_P08847295 | Egr2           | 1.41628  |
| A_68_P10532573 | Ggps1          | 1.416277 |
| A_68_P07727688 | Mapk6          | 1.416144 |
| A_68_P05599196 | Kcna6          | 1.41612  |
| A_68_P03785877 | BC055111-Ttc22 | 1.415562 |
| A_68_P11165637 | Fut11          | 1.4155   |
| A_68_P08846692 | Spryd4         | 1.415497 |
| A_68_P05383985 | Xpc            | 1.41505  |
| A_68_P04773450 | Pdgfra         | 1.414745 |
| A_68_P05177341 | Egr4           | 1.414737 |
| A_68_P08596256 | Rps12          | 1.414491 |
| A_68_P04267219 | Emid2          | 1.414474 |

|                |                          |          |
|----------------|--------------------------|----------|
| A_68_P08369612 | Erbp3                    | 1.414335 |
| A_68_P01803899 | Freq                     | 1.414255 |
| A_68_P11073717 | Arsb                     | 1.41418  |
| A_68_P14648818 | Mbtps2                   | 1.414155 |
| A_68_P01179072 | Gata3                    | 1.413519 |
| A_68_P01471724 | Lcn10                    | 1.413126 |
| A_68_P13558584 | D630044L22Rik            | 1.412965 |
| A_68_P08570676 | Tmem26                   | 1.41296  |
| A_68_P14362696 | Frat2                    | 1.412927 |
| A_68_P08695482 | Thap2-Ccdc131            | 1.412775 |
| A_68_P04993202 | Kit                      | 1.412386 |
| A_68_P08933526 | C78409                   | 1.412292 |
| A_68_P01253607 | Hoxd1                    | 1.412185 |
| A_68_P08840694 | Arid3a                   | 1.41205  |
| A_68_P06690927 | 2310079N02Rik            | 1.411868 |
| A_68_P11148928 | Anxa11                   | 1.411635 |
| A_68_P04112279 | Gpr30                    | 1.411359 |
| A_68_P11889047 | Plcx3                    | 1.411342 |
| A_68_P13035016 | B3gnt5                   | 1.41126  |
| A_68_P04331827 | Cdc7                     | 1.411212 |
| A_68_P07544112 | Arpp21                   | 1.41066  |
| A_68_P14064072 | Reep5                    | 1.410302 |
| A_68_P12480253 | Cldnd1                   | 1.410216 |
| A_68_P02745695 | Shc1                     | 1.410115 |
| A_68_P01768509 | Stk35                    | 1.410081 |
| A_68_P00197320 | Serpine2                 | 1.409812 |
| A_68_P13390073 | Crim1                    | 1.409611 |
| A_68_P11935737 | Syng1                    | 1.409608 |
| A_68_P01606729 | Entpd2                   | 1.409584 |
| A_68_P02127773 | 2310047O13Rik            | 1.409435 |
| A_68_P11438500 | D14Ert449e-C330003B14Rik | 1.409267 |
| A_68_P06506013 | Ruvbl2                   | 1.409265 |
| A_68_P04225894 | Slc10a6                  | 1.409035 |
| A_68_P09739582 | Nfe2l1                   | 1.40894  |
| A_68_P09099281 | A830053O21Rik            | 1.408666 |

|                |                           |          |
|----------------|---------------------------|----------|
| A_68_P03619385 | Abca1                     | 1.40855  |
| A_68_P05106728 | Atg7                      | 1.408502 |
| A_68_P01164453 | Slc24a5                   | 1.408495 |
| A_68_P04573997 | Akap9                     | 1.408491 |
| A_68_P04926215 | Fzd10                     | 1.408413 |
| A_68_P04548189 | Mvk                       | 1.408201 |
| A_68_P07321200 | Terf2ip                   | 1.408189 |
| A_68_P13667994 | Txn14                     | 1.408137 |
| A_68_P08704016 | Perp                      | 1.408008 |
| A_68_P04993591 | C130026L21Rik             | 1.407896 |
| A_68_P12755351 | Qtrtd1                    | 1.407895 |
| A_68_P14223579 | Lgals12-Hrasls5           | 1.407721 |
| A_68_P01887581 | Shc4                      | 1.407557 |
| A_68_P06087354 | Pnpla2                    | 1.407456 |
| A_68_P08769438 | Col18a1                   | 1.407443 |
| A_68_P01312676 | D2Erttd391e               | 1.407283 |
| A_68_P08484085 | 1810043G02Rik             | 1.407145 |
| A_68_P01268002 | Lrp4                      | 1.406906 |
| A_68_P07866293 | Angptl6                   | 1.406897 |
| A_68_P14474026 | Gda                       | 1.40678  |
| A_68_P02611641 | ENSMUST00000071298.4:-360 | 1.40673  |
| A_68_P04827265 | 6530401C20Rik             | 1.406628 |
| A_68_P07312071 | Sf4                       | 1.406581 |
| A_68_P09752136 | Laptm4a                   | 1.406447 |
| A_68_P11779116 | Pou4f1                    | 1.4062   |
| A_68_P00672918 | Arid5a                    | 1.40602  |
| A_68_P12087654 | Cycl                      | 1.405795 |
| A_68_P12599801 | Ccdc58                    | 1.405643 |
| A_68_P01159756 | Hrh3                      | 1.405563 |
| A_68_P13728786 | Dsc2                      | 1.405461 |
| A_68_P06236830 | Tmem9b                    | 1.40538  |
| A_68_P07400832 | Syce2                     | 1.405056 |
| A_68_P14800321 | Dusp9                     | 1.405003 |
| A_68_P05344579 | Tnfrsf1a                  | 1.404816 |
| A_68_P06336171 | Kcnc1                     | 1.404805 |

|                |                   |          |
|----------------|-------------------|----------|
| A_68_P11347693 | Bmpr1a            | 1.404725 |
| A_68_P08070275 | Wdr48             | 1.404703 |
| A_68_P09521152 | Ogdh              | 1.404657 |
| A_68_P09052341 | Vps25             | 1.40439  |
| A_68_P13117097 | Bak1              | 1.404249 |
| A_68_P01065374 | Armc9             | 1.404223 |
| A_68_P08145910 | 6230410P16Rik     | 1.404188 |
| A_68_P03647537 | Slc35d1           | 1.404044 |
| A_68_P07200483 | Ier2              | 1.403966 |
| A_68_P07746395 | Pik3cb            | 1.403855 |
| A_68_P08169692 | Mtmr2             | 1.403774 |
| A_68_P13166533 | Ddah2             | 1.403479 |
| A_68_P05117228 | Anxa4             | 1.403256 |
| A_68_P05419220 | Cdca3             | 1.402922 |
| A_68_P02246977 | BC005624          | 1.402907 |
| A_68_P13535592 | Kcng3             | 1.402734 |
| A_68_P01762541 | Sall4             | 1.402549 |
| A_68_P05984762 | Fah               | 1.402305 |
| A_68_P10182243 | Esrrb             | 1.402228 |
| A_68_P03211665 | 5830433M19Rik     | 1.401909 |
| A_68_P11815323 | Jub               | 1.401794 |
| A_68_P14457991 | Prkg1             | 1.401775 |
| A_68_P09287103 | D130058I21Rik     | 1.401518 |
| A_68_P07336121 | Mvd-9330133O14Rik | 1.401257 |
| A_68_P09038460 | Mink1             | 1.400997 |
| A_68_P13136058 | Rps2              | 1.400933 |
| A_68_P08395271 | Smarcc2           | 1.400637 |
| A_68_P06596029 | Ppp5c             | 1.400623 |
| A_68_P00947977 | Lpgat1            | 1.400579 |
| A_68_P07243848 | Ptger1            | 1.400369 |
| A_68_P09368962 | Sox9              | 1.400111 |
| A_68_P00575084 | Ivns1abp          | 1.400032 |
| A_68_P04319123 | Iqce              | 1.399843 |
| A_68_P07183169 | Nek5              | 1.399702 |
| A_68_P14350019 | Smc5              | 1.399613 |



|                |                         |          |
|----------------|-------------------------|----------|
| A_68_P13118031 | H2-Ke6                  | 1.399464 |
| A_68_P01966879 | Freq                    | 1.399423 |
| A_68_P14345132 | Pcgf5                   | 1.399081 |
| A_68_P01238229 | Pacsin3                 | 1.398803 |
| A_68_P05991307 | Pde3b                   | 1.398775 |
| A_68_P02545177 | Ctnbp2nl                | 1.398716 |
| A_68_P14323852 | Psd                     | 1.39869  |
| A_68_P14070108 | Sap130                  | 1.398543 |
| A_68_P05993284 | Nr1h2                   | 1.398225 |
| A_68_P00258736 | ENSMUST00000066061.3:55 | 1.398031 |
| A_68_P06431492 | Lmo1                    | 1.397984 |
| A_68_P01299919 | Hoxd3                   | 1.3979   |
| A_68_P12600289 | Peyt1a                  | 1.397789 |
| A_68_P13149887 | Zfp598                  | 1.397554 |
| A_68_P06939152 | E2f4                    | 1.397251 |
| A_68_P11746907 | Zfp503                  | 1.397196 |
| A_68_P05985286 | Sergef                  | 1.39704  |
| A_68_P12361670 | Zfp385                  | 1.396871 |
| A_68_P14996501 | Bgn                     | 1.396756 |
| A_68_P01894888 | Itpka                   | 1.396384 |
| A_68_P04148393 | Tmed5                   | 1.395791 |
| A_68_P01288371 | Fbn1                    | 1.395572 |
| A_68_P09486902 | Stc2                    | 1.395364 |
| A_68_P07046584 | Asah1                   | 1.395332 |
| A_68_P06621037 | Sec23ip                 | 1.394899 |
| A_68_P13472939 | Lama1                   | 1.394849 |
| A_68_P01309646 | Gzfl                    | 1.394803 |
| A_68_P03926231 | Necap2                  | 1.394675 |
| A_68_P11556763 | A430057M04Rik           | 1.394618 |
| A_68_P10775535 | Esm1                    | 1.394554 |
| A_68_P05104718 | Wnt2                    | 1.394544 |
| A_68_P13612986 | Epc1                    | 1.394476 |
| A_68_P05404915 | Prr15                   | 1.393836 |
| A_68_P05541771 | Fgf23                   | 1.393465 |
| A_68_P12276707 | Tmem74                  | 1.393354 |

|                |               |          |
|----------------|---------------|----------|
| A_68_P04131879 | Tmem142a      | 1.39334  |
| A_68_P00658070 | Gbx2          | 1.39303  |
| A_68_P01970209 | Fjx1          | 1.392996 |
| A_68_P03326897 | Gpr153        | 1.392775 |
| A_68_P11906856 | Ccnt1         | 1.392682 |
| A_68_P06219796 | A930008G19Rik | 1.392584 |
| A_68_P03522571 | Nbl1          | 1.392393 |
| A_68_P02259738 | Fbxo3         | 1.392196 |
| A_68_P06448743 | Clptm1        | 1.392008 |
| A_68_P00366679 | Stat4         | 1.391931 |
| A_68_P02071364 | Wisp2         | 1.391697 |
| A_68_P13088188 | 2600005C20Rik | 1.391603 |
| A_68_P05915386 | 1700008P20Rik | 1.39133  |
| A_68_P09136314 | Baiap2        | 1.391135 |
| A_68_P01251024 | Gfra4         | 1.390863 |
| A_68_P06444721 | Snrpa         | 1.390819 |
| A_68_P12432039 | Galnt6        | 1.390555 |
| A_68_P08263375 | Kif5a-Dctn2   | 1.390248 |
| A_68_P10959245 | Tcfap2a       | 1.389782 |
| A_68_P13355809 | Grm4          | 1.38968  |
| A_68_P13218398 | Rfx2          | 1.389655 |
| A_68_P14143571 | Nkx2-3        | 1.389652 |
| A_68_P09575640 | Ddx52         | 1.389378 |
| A_68_P04225894 | Slc10a6       | 1.389107 |
| A_68_P06506913 | Trim3         | 1.389077 |
| A_68_P01970205 | Fjx1          | 1.389068 |
| A_68_P12384339 | Faim2         | 1.388914 |
| A_68_P04027659 | Zfp46         | 1.388822 |
| A_68_P13518978 | Satb1         | 1.388787 |
| A_68_P00229523 | Rcor3         | 1.388748 |
| A_68_P09530799 | H3f3b-Zc3h5   | 1.38853  |
| A_68_P03606820 | Psmb2         | 1.388438 |
| A_68_P05290332 | Gpr85         | 1.388344 |
| A_68_P09307716 | Doc2b         | 1.388135 |
| A_68_P13106791 | Tulp1         | 1.38813  |

|                |               |          |
|----------------|---------------|----------|
| A_68_P04979692 | 9430057O19Rik | 1.388107 |
| A_68_P09283842 | Dnajc7        | 1.388086 |
| A_68_P14437291 | 5730596K20Rik | 1.388059 |
| A_68_P12756270 | Pigz          | 1.387949 |
| A_68_P12599777 | 2310056P07Rik | 1.387905 |
| A_68_P10336568 | Clec14a       | 1.38777  |
| A_68_P06534995 | Cdkn1c        | 1.387423 |
| A_68_P04148393 | Tmed5         | 1.38708  |
| A_68_P03843357 | Ppih          | 1.387038 |
| A_68_P05899443 | Rgma          | 1.387037 |
| A_68_P03730091 | Ube2j2        | 1.387025 |
| A_68_P09825102 | Spnb1         | 1.386913 |
| A_68_P09034561 | Gas2l1        | 1.3869   |
| A_68_P12603717 | Sim2          | 1.386852 |
| A_68_P11500059 | Mrpl52        | 1.386783 |
| A_68_P13265576 | Jmjd2b        | 1.386546 |
| A_68_P12109009 | Rapgef3       | 1.3864   |
| A_68_P04267219 | Emid2         | 1.386388 |
| A_68_P11899315 | BC024139      | 1.386175 |
| A_68_P02983160 | Pcdh10        | 1.38612  |
| A_68_P08756565 | Col13a1       | 1.385371 |
| A_68_P09944887 | Vsnl1         | 1.385207 |
| A_68_P04773930 | Aym1          | 1.385083 |
| A_68_P08396864 | Crsp3         | 1.384899 |
| A_68_P02482328 | Vps72         | 1.384805 |
| A_68_P09221420 | 1110014K08Rik | 1.38463  |
| A_68_P01655095 | Spata2        | 1.38454  |
| A_68_P05297003 | Copg2         | 1.384242 |
| A_68_P09056902 | 1700052K11Rik | 1.383926 |
| A_68_P01647847 | Atp5e         | 1.383894 |
| A_68_P01891391 | Pdia3         | 1.383835 |
| A_68_P00173418 | Atic          | 1.383755 |
| A_68_P03554177 | Mycl1         | 1.383272 |
| A_68_P04947548 | Uchl1         | 1.383216 |
| A_68_P03990834 | Ube2r2        | 1.383192 |

|                |                            |          |
|----------------|----------------------------|----------|
| A_68_P04553689 | Cenpc1-AI586015            | 1.383103 |
| A_68_P02598927 | Mynn                       | 1.383037 |
| A_68_P04090888 | D4Wsu114e                  | 1.382935 |
| A_68_P01643181 | Zswim1                     | 1.382825 |
| A_68_P05148540 | Nagk                       | 1.382579 |
| A_68_P04062160 | Ythdf2                     | 1.382375 |
| A_68_P06316193 | Ebf3                       | 1.382308 |
| A_68_P09866881 | Rcor1                      | 1.382291 |
| A_68_P03372374 | Zswim5                     | 1.382106 |
| A_68_P06614084 | Nr2f2                      | 1.381956 |
| A_68_P10538246 | Cetn3                      | 1.381864 |
| A_68_P10435878 | Matn3                      | 1.381514 |
| A_68_P14396329 | Mxi1                       | 1.381129 |
| A_68_P05297197 | Tmem111                    | 1.380924 |
| A_68_P03003493 | Kcnn3                      | 1.380836 |
| A_68_P03296780 | Klhl9                      | 1.380505 |
| A_68_P03728571 | B230396O12Rik              | 1.380472 |
| A_68_P06035662 | U2af114                    | 1.380132 |
| A_68_P01531594 | Mdk                        | 1.380085 |
| A_68_P09618735 | Aldoc                      | 1.37995  |
| A_68_P04736301 | Plod3                      | 1.379897 |
| A_68_P06837702 | Thap1                      | 1.379833 |
| A_68_P09641175 | Slc16a11                   | 1.379772 |
| A_68_P12923443 | Pmm2                       | 1.37977  |
| A_68_P07140101 | 2310036O22Rik              | 1.379761 |
| A_68_P13874169 | Rps14                      | 1.379688 |
| A_68_P12061444 | Tob2                       | 1.379532 |
| A_68_P09065614 | ENSMUST00000039627.4:-4128 | 1.379415 |
| A_68_P10492574 | Ippk                       | 1.379165 |
| A_68_P09358750 | Casc3                      | 1.37902  |
| A_68_P02650789 | Setd7                      | 1.379015 |
| A_68_P03980046 | Zdhhc18                    | 1.37898  |
| A_68_P11790058 | Dzip1                      | 1.378915 |
| A_68_P10785709 | 1300014I06Rik              | 1.378813 |
| A_68_P05072118 | 4631427C17Rik              | 1.378789 |

|                |                     |          |
|----------------|---------------------|----------|
| A_68_P11456818 | Slc25a37            | 1.378742 |
| A_68_P06524443 | Mtg1                | 1.378636 |
| A_68_P14233015 | Ccdc85b-Fibp        | 1.378482 |
| A_68_P13844477 | Fchsd1              | 1.378292 |
| A_68_P01293034 | 4833422F24Rik       | 1.37812  |
| A_68_P08711144 | Nnp1-Cstb           | 1.37781  |
| A_68_P11632181 | Jph4                | 1.377748 |
| A_68_P02396754 | Aadacl1             | 1.377644 |
| A_68_P09069020 | Arl5c               | 1.37755  |
| A_68_P07045118 | 4930481F22Rik       | 1.377452 |
| A_68_P13678357 | Atp5a1              | 1.377243 |
| A_68_P04502460 | Rnf6                | 1.377125 |
| A_68_P11226193 | Hs6st3              | 1.376937 |
| A_68_P03530044 | Cpt2                | 1.376568 |
| A_68_P11374615 | Grid1               | 1.376491 |
| A_68_P11209114 | Camk2g              | 1.376363 |
| A_68_P13426419 | Slc22a3             | 1.376332 |
| A_68_P07822223 | Nr2e3               | 1.376269 |
| A_68_P02536571 | Slc16a1             | 1.376226 |
| A_68_P06654367 | Plekhg2             | 1.376085 |
| A_68_P14392026 | Pten                | 1.376069 |
| A_68_P14231962 | Cnm2                | 1.375977 |
| A_68_P10857129 | Cdc14b              | 1.375892 |
| A_68_P01338331 | Hoxd9               | 1.375892 |
| A_68_P04909159 | D5Wsu178e           | 1.375863 |
| A_68_P05112722 | 5830446M03Rik       | 1.375693 |
| A_68_P04896136 | Htr5a               | 1.375403 |
| A_68_P03188324 | Mtx1                | 1.375399 |
| A_68_P07804000 | Ccpgl               | 1.375399 |
| A_68_P04360651 | Ache                | 1.375347 |
| A_68_P05725849 | Hoxa1               | 1.37527  |
| A_68_P13506305 | Ccnd3               | 1.374951 |
| A_68_P06943436 | Irx6                | 1.374926 |
| A_68_P10284063 | Tgfb3-1700019E19Rik | 1.374346 |
| A_68_P08300526 | Mon2                | 1.374212 |

|                |                |          |
|----------------|----------------|----------|
| A_68_P09214099 | Plekhh3        | 1.374172 |
| A_68_P08229110 | Tnfaip3        | 1.374171 |
| A_68_P12451534 | Atf7           | 1.374133 |
| A_68_P08714775 | Tcba1          | 1.373898 |
| A_68_P08936079 | A_68_P08936079 | 1.373831 |
| A_68_P04711913 | Arl6ip4        | 1.373688 |
| A_68_P02843046 | Prkci          | 1.373503 |
| A_68_P08288178 | Tmtc2          | 1.373478 |
| A_68_P11507565 | Pcdh17         | 1.373314 |
| A_68_P09393918 | Nsf            | 1.373122 |
| A_68_P06620448 | 5430432N15Rik  | 1.373091 |
| A_68_P14729681 | Utp14a         | 1.373044 |
| A_68_P09644084 | Srebf1         | 1.372953 |
| A_68_P04071366 | Plaa           | 1.372942 |
| A_68_P10419758 | Chx10          | 1.372918 |
| A_68_P14930315 | Phka2          | 1.372906 |
| A_68_P09439572 | Bcl6b          | 1.372588 |
| A_68_P03214207 | Slc9a1         | 1.372505 |
| A_68_P03139924 | Zbtb7b         | 1.372303 |
| A_68_P00400070 | Kif1a          | 1.372232 |
| A_68_P12079965 | 2810451A06Rik  | 1.372009 |
| A_68_P07098077 | Helt           | 1.37197  |
| A_68_P09018398 | Gprc5c         | 1.371571 |
| A_68_P11173734 | Efs-II25       | 1.371543 |
| A_68_P01542525 | Ghrh           | 1.371424 |
| A_68_P01305510 | Ncoa5          | 1.371345 |
| A_68_P09304808 | Stac2          | 1.371162 |
| A_68_P12059852 | Smardc1        | 1.37113  |
| A_68_P01897769 | F730014I05Rik  | 1.370526 |
| A_68_P03402252 | Jmjd2a         | 1.370393 |
| A_68_P01522585 | Pxmp4          | 1.370355 |
| A_68_P03560289 | Elavl2         | 1.370244 |
| A_68_P01776405 | Olfml2a        | 1.370219 |
| A_68_P11948519 | Aqp5           | 1.369786 |
| A_68_P09731018 | Myo1c          | 1.369689 |

|                |                 |          |
|----------------|-----------------|----------|
| A_68_P01296062 | Gm757           | 1.369492 |
| A_68_P09128453 | Cbx4            | 1.369373 |
| A_68_P04567450 | Klf3            | 1.369206 |
| A_68_P07849832 | Plod2           | 1.369079 |
| A_68_P02824933 | Acp6            | 1.368999 |
| A_68_P11937879 | BC030396        | 1.368711 |
| A_68_P14473024 | Cabp2           | 1.368553 |
| A_68_P14029021 | Galr1           | 1.368517 |
| A_68_P09288447 | Pycr1           | 1.368094 |
| A_68_P14040519 | Pcdhgb5         | 1.368076 |
| A_68_P04528236 | Trim50          | 1.36805  |
| A_68_P11507594 | Pcdh17          | 1.368004 |
| A_68_P04306525 | Zan             | 1.367971 |
| A_68_P14329940 | Emx2            | 1.367887 |
| A_68_P08034953 | Plod2           | 1.367712 |
| A_68_P14977649 | Ube2a           | 1.367694 |
| A_68_P06657211 | Zfp629          | 1.367464 |
| A_68_P10509192 | Pitx1           | 1.367427 |
| A_68_P09926608 | BC048191:-5384  | 1.367412 |
| A_68_P08937904 | Eef2            | 1.367389 |
| A_68_P05308436 | Sec61a1         | 1.367066 |
| A_68_P10681710 | Zfp367          | 1.366745 |
| A_68_P12544071 | Dirc2           | 1.366414 |
| A_68_P08850557 | Tpd5211         | 1.366224 |
| A_68_P08108310 | Dusp7           | 1.366104 |
| A_68_P12461149 | Krt2-25         | 1.365982 |
| A_68_P01545930 | Mrpl41-Pnpla7   | 1.36588  |
| A_68_P04553689 | Cenpc1-AI586015 | 1.365725 |
| A_68_P03553494 | Espn            | 1.365602 |
| A_68_P03544448 | Gnl2            | 1.365596 |
| A_68_P03468979 | Prdm16          | 1.365587 |
| A_68_P09559324 | Pdlim4          | 1.365574 |
| A_68_P13406566 | Tnfrsf21        | 1.365562 |
| A_68_P04945505 | Apbb2           | 1.365452 |
| A_68_P09562188 | 4930412M03Rik   | 1.365373 |

|                |                     |          |
|----------------|---------------------|----------|
| A_68_P06122748 | Car11               | 1.365326 |
| A_68_P14204208 | Cox8a               | 1.36519  |
| A_68_P15210311 | Sox3                | 1.365151 |
| A_68_P09652799 | Syngn2              | 1.365124 |
| A_68_P07955703 | 5730536A07Rik       | 1.365076 |
| A_68_P08710844 | Trpm2-1810043G02Rik | 1.364919 |
| A_68_P09367780 | Pfn1-Eno3           | 1.364641 |
| A_68_P07533500 | Xrn1                | 1.364598 |
| A_68_P07800229 | Tspan3              | 1.364446 |
| A_68_P06621039 | Sec23ip             | 1.364314 |
| A_68_P00513237 | Stk17b              | 1.364225 |
| A_68_P11602112 | Dnajc15             | 1.364046 |
| A_68_P05987579 | Rnf121              | 1.363856 |
| A_68_P07889708 | Mon1a               | 1.363671 |
| A_68_P05584898 | Bcat1               | 1.363543 |
| A_68_P10254191 | Egln3               | 1.363475 |
| A_68_P06381447 | Rasl2-9             | 1.363394 |
| A_68_P10248353 | Kcnk13              | 1.36297  |
| A_68_P04345686 | 2410025L10Rik       | 1.362961 |
| A_68_P04137812 | Epo                 | 1.362834 |
| A_68_P06930178 | B3gnt3              | 1.36283  |
| A_68_P09207680 | Utp18               | 1.362568 |
| A_68_P06262927 | Trim68              | 1.36233  |
| A_68_P06843511 | 2810428I15Rik       | 1.362321 |
| A_68_P10548283 | Muted               | 1.362311 |
| A_68_P09506627 | Serpinf2            | 1.361829 |
| A_68_P07319297 | Rrad                | 1.361657 |
| A_68_P08257942 | BC030440            | 1.361606 |
| A_68_P09086358 | Gas2l1              | 1.361406 |
| A_68_P13472163 | Six2                | 1.361346 |
| A_68_P07373423 | A_68_P07373423      | 1.361299 |
| A_68_P02991822 | Tspan2              | 1.361271 |
| A_68_P03975839 | Prdm16              | 1.361225 |
| A_68_P09431553 | St6galnac2          | 1.36106  |
| A_68_P14165549 | Sh3pxd2a            | 1.36092  |



|                |               |          |
|----------------|---------------|----------|
| A_68_P03087427 | Pklr          | 1.360755 |
| A_68_P06189872 | Mesp1         | 1.360117 |
| A_68_P06767594 | Fnta          | 1.359884 |
| A_68_P08782489 | Rkhd1         | 1.359853 |
| A_68_P09330589 | Rasd1         | 1.359832 |
| A_68_P07960242 | Angptl6-Ppan  | 1.359635 |
| A_68_P09343918 | BC030477      | 1.359591 |
| A_68_P06275562 | Uqcrc2        | 1.359574 |
| A_68_P06957976 | Dctd          | 1.359437 |
| A_68_P12292478 | Card10        | 1.359368 |
| A_68_P09621168 | Ankrd43       | 1.359124 |
| A_68_P07023164 | Sin3b         | 1.359102 |
| A_68_P08049234 | Copb2         | 1.3591   |
| A_68_P00344185 | Sox17         | 1.359051 |
| A_68_P02752639 | Hist2h2be     | 1.358796 |
| A_68_P03926231 | Necap2        | 1.358794 |
| A_68_P08241070 | D10Ert610e    | 1.35868  |
| A_68_P02208449 | Pdk1          | 1.358569 |
| A_68_P07818869 | Yap1          | 1.35845  |
| A_68_P04715249 | Tbx5          | 1.358255 |
| A_68_P04573997 | Akap9         | 1.358183 |
| A_68_P04959693 | Vps33a        | 1.358157 |
| A_68_P01628470 | Rassf2        | 1.35812  |
| A_68_P07312427 | Dynlrb2       | 1.357711 |
| A_68_P12988162 | Slc12a8       | 1.35762  |
| A_68_P05744316 | Pde3a         | 1.357319 |
| A_68_P03447018 | Cd72          | 1.357295 |
| A_68_P05984752 | Fah           | 1.357283 |
| A_68_P09271419 | Aatf          | 1.35714  |
| A_68_P08935045 | 2310011J03Rik | 1.35709  |
| A_68_P11697259 | Dis3          | 1.357089 |
| A_68_P15210082 | Praf2         | 1.357039 |
| A_68_P09476913 | Shbg          | 1.357021 |
| A_68_P07308039 | 2410018C20Rik | 1.35682  |
| A_68_P00583491 | Irf6          | 1.356818 |

|                |                 |          |
|----------------|-----------------|----------|
| A_68_P10325476 | Mycn            | 1.356815 |
| A_68_P09535305 | Dhx33           | 1.356791 |
| A_68_P10205334 | Yy1             | 1.356638 |
| A_68_P03107450 | Creb3l4-Slc39a1 | 1.356226 |
| A_68_P00395221 | 5330401P04Rik   | 1.355914 |
| A_68_P01175967 | Dgkz            | 1.355853 |
| A_68_P04116773 | Thrap2          | 1.3557   |
| A_68_P07412696 | Edc4            | 1.355528 |
| A_68_P07590783 | Traip           | 1.355514 |
| A_68_P06787361 | Tusc3           | 1.355374 |
| A_68_P05288271 | Ppih            | 1.355363 |
| A_68_P00578461 | Zc3h11a         | 1.354905 |
| A_68_P15038878 | Apln            | 1.354848 |
| A_68_P13272683 | Epas1           | 1.354825 |
| A_68_P04071366 | Plaa            | 1.354794 |
| A_68_P13270003 | Zfp598          | 1.354616 |
| A_68_P01648426 | 3110001A13Rik   | 1.354465 |
| A_68_P08628561 | Lgr5            | 1.354383 |
| A_68_P08526428 | Ddit3           | 1.354312 |
| A_68_P03346618 | Id3             | 1.354262 |
| A_68_P08151133 | Ctnnb1          | 1.354251 |
| A_68_P03041163 | Sfrp2           | 1.354188 |
| A_68_P00850156 | Lhx9            | 1.354146 |
| A_68_P01982873 | BC066135        | 1.354133 |
| A_68_P02650791 | Setd7           | 1.35405  |
| A_68_P01996978 | 2310042G06Rik   | 1.353975 |
| A_68_P10900081 | Mier3           | 1.353863 |
| A_68_P09530012 | 1110014K08Rik   | 1.353795 |
| A_68_P08873707 | Rpl41           | 1.353531 |
| A_68_P08215262 | Cnn2            | 1.353368 |
| A_68_P03629045 | Lin28           | 1.353088 |
| A_68_P13359198 | Lrpprc          | 1.352684 |
| A_68_P02942719 | D3Ucla1         | 1.352676 |
| A_68_P13733932 | Map3k8          | 1.352645 |
| A_68_P11042513 | 4930544M13Rik   | 1.352578 |

|                |                |          |
|----------------|----------------|----------|
| A_68_P11979317 | Tssk5          | 1.352506 |
| A_68_P12380453 | Matn2          | 1.35234  |
| A_68_P12267844 | Krt18          | 1.352302 |
| A_68_P04852339 | A230097K15Rik  | 1.352224 |
| A_68_P05286103 | Wnk1           | 1.351995 |
| A_68_P03261704 | Dctn3          | 1.351677 |
| A_68_P15121552 | Morc4          | 1.351601 |
| A_68_P05362381 | Camk1          | 1.351543 |
| A_68_P04157606 | Xrcc2          | 1.351487 |
| A_68_P12816958 | Ephb3          | 1.351482 |
| A_68_P07561567 | Entpd3         | 1.351388 |
| A_68_P14209540 | Rin1           | 1.351306 |
| A_68_P10141170 | Prkch          | 1.351304 |
| A_68_P06740718 | 2400003C14Rik  | 1.35104  |
| A_68_P03876320 | Zfp691         | 1.350926 |
| A_68_P12183195 | Nfe2           | 1.350856 |
| A_68_P08902269 | Slc35d3        | 1.350802 |
| A_68_P01571536 | Aurka-Cstf1    | 1.350651 |
| A_68_P03785877 | BC055111-Ttc22 | 1.350646 |
| A_68_P02133880 | Plxdc2         | 1.350433 |
| A_68_P08642932 | Smarcc2        | 1.350404 |
| A_68_P08168098 | Ankrd25        | 1.350332 |
| A_68_P04667157 | Snx17          | 1.350214 |
| A_68_P14751401 | Usp11          | 1.350082 |
| A_68_P01833937 | Pax6           | 1.350024 |
| A_68_P03349816 | Hkr3           | 1.350021 |
| A_68_P01326999 | Ndr3           | 1.349854 |
| A_68_P09547541 | BC017647       | 1.349829 |
| A_68_P14345668 | Slc22a8        | 1.349805 |
| A_68_P04138127 | Fzd10          | 1.349726 |
| A_68_P07581372 | Zmynd10        | 1.34956  |
| A_68_P11281790 | 2600011E07Rik  | 1.349521 |
| A_68_P01880312 | Abtb2          | 1.349509 |
| A_68_P08065769 | Fbxl12         | 1.349498 |
| A_68_P14204146 | Hspa12a        | 1.349416 |

|                |               |          |
|----------------|---------------|----------|
| A_68_P14154165 | Ina           | 1.349086 |
| A_68_P11888728 | Poldip3       | 1.348888 |
| A_68_P02189747 | Hrh3          | 1.348859 |
| A_68_P09491191 | D130058I21Rik | 1.348836 |
| A_68_P12229235 | Rrm2b         | 1.348748 |
| A_68_P13614347 | B4galt6       | 1.348725 |
| A_68_P07513276 | Pcolce2       | 1.348558 |
| A_68_P14251879 | Mtvr2         | 1.348314 |
| A_68_P12246601 | Myo10         | 1.347759 |
| A_68_P02376968 | Gipc2         | 1.34724  |
| A_68_P03413661 | Padi4         | 1.347227 |
| A_68_P13867090 | Pard6g        | 1.347198 |
| A_68_P10256825 | Erh           | 1.347184 |
| A_68_P03581861 | St3gal3       | 1.346935 |
| A_68_P02042838 | Bub1          | 1.346842 |
| A_68_P09349428 | Pscd1         | 1.34676  |
| A_68_P06975475 | Gpr124        | 1.346702 |
| A_68_P13450829 | Tapbp         | 1.346546 |
| A_68_P13760300 | Cxxc1         | 1.346271 |
| A_68_P02034225 | Itga6         | 1.34623  |
| A_68_P01668369 | Slc35c1       | 1.346227 |
| A_68_P05743578 | Skap2         | 1.346152 |
| A_68_P00932141 | Epha4         | 1.345694 |
| A_68_P03666605 | Astn2         | 1.345672 |
| A_68_P12569215 | Dscr3         | 1.345575 |
| A_68_P08358935 | Lace1         | 1.34541  |
| A_68_P12809557 | B4galt4       | 1.345325 |
| A_68_P11067498 | Phactr1       | 1.345283 |
| A_68_P12233069 | Mb            | 1.344955 |
| A_68_P06519012 | AI480556-Rras | 1.344768 |
| A_68_P07281036 | Gse1          | 1.344759 |
| A_68_P02773136 | 5730470L24Rik | 1.344748 |
| A_68_P04780549 | Scarb2        | 1.344603 |
| A_68_P15158572 | Ofd1          | 1.3446   |
| A_68_P09262940 | BC025575      | 1.344398 |

|                |                      |          |
|----------------|----------------------|----------|
| A_68_P09132227 | Cacng4               | 1.344268 |
| A_68_P06926957 | Nob1                 | 1.344266 |
| A_68_P14674510 | Slc6a8               | 1.344259 |
| A_68_P02018771 | Snap25               | 1.343965 |
| A_68_P11526178 | A_68_P11526178       | 1.343918 |
| A_68_P14452830 | Tle4                 | 1.343911 |
| A_68_P04442361 | Msi1                 | 1.343595 |
| A_68_P06269772 | Fzd4                 | 1.343371 |
| A_68_P11740899 | Bmp4                 | 1.343306 |
| A_68_P03814073 | Rbm35a               | 1.343292 |
| A_68_P09555116 | E130012A19Rik        | 1.343019 |
| A_68_P13425847 | Klc4-Mrpl2           | 1.342837 |
| A_68_P06410140 | Zfp710               | 1.342657 |
| A_68_P07976988 | 4733401H18Rik-Dalrd3 | 1.342376 |
| A_68_P04803354 | Arpc1b               | 1.34237  |
| A_68_P03126835 | Shox2                | 1.342282 |
| A_68_P00022370 | Zfp451               | 1.342006 |
| A_68_P15105004 | RbmX                 | 1.341812 |
| A_68_P01463378 | Psmf1                | 1.341786 |
| A_68_P09885031 | Btbd7                | 1.341409 |
| A_68_P14420132 | Ldb1                 | 1.341373 |
| A_68_P08817684 | Sgk                  | 1.34136  |
| A_68_P00225465 | Lamc2                | 1.341294 |
| A_68_P03547730 | Cc2d1b               | 1.341291 |
| A_68_P04946573 | Fbx15                | 1.341015 |
| A_68_P04542655 | Cdk8                 | 1.340796 |
| A_68_P02120879 | 3230401D17Rik        | 1.34075  |
| A_68_P14299210 | Foxb2                | 1.340422 |
| A_68_P03226841 | Pla2g2c              | 1.340313 |
| A_68_P04153080 | 1200011O22Rik        | 1.3403   |
| A_68_P05187965 | Podxl                | 1.340224 |
| A_68_P11260838 | Bmpr1a               | 1.340096 |
| A_68_P09116447 | Tmem132e             | 1.340034 |
| A_68_P06909746 | Nup133               | 1.340005 |
| A_68_P09390157 | 4933400C05Rik        | 1.339906 |

|                |                     |          |
|----------------|---------------------|----------|
| A_68_P09703832 | Epn3                | 1.33988  |
| A_68_P13106317 | Tgif                | 1.339856 |
| A_68_P07037040 | Upfl                | 1.339657 |
| A_68_P12240204 | Rangap1             | 1.339423 |
| A_68_P00542898 | Nppc                | 1.339229 |
| A_68_P14212477 | Cpt1a               | 1.338795 |
| A_68_P00859453 | Lhx9                | 1.33871  |
| A_68_P09485925 | Rnfl35              | 1.338685 |
| A_68_P14842575 | Ubelx               | 1.338503 |
| A_68_P02492290 | Mcl1                | 1.338463 |
| A_68_P02142088 | 3230401D17Rik       | 1.338314 |
| A_68_P08883003 | Ppa1                | 1.338308 |
| A_68_P12608100 | Lztr1               | 1.338218 |
| A_68_P12815673 | Dcbld2              | 1.33818  |
| A_68_P04481832 | 9530056K15Rik       | 1.337965 |
| A_68_P06897654 | Slc35e1             | 1.337857 |
| A_68_P02293891 | Wdr3-Gdap2          | 1.337747 |
| A_68_P06292783 | Sae1                | 1.337643 |
| A_68_P09207933 | Sf3a1               | 1.337435 |
| A_68_P01506207 | Ndor1-C730025P13Rik | 1.337302 |
| A_68_P10419767 | Chx10               | 1.337082 |
| A_68_P02123487 | Manbal              | 1.336735 |
| A_68_P14467080 | 1810009A15Rik       | 1.336308 |
| A_68_P14295260 | Foxb2               | 1.336267 |
| A_68_P11575462 | Xpo4                | 1.33622  |
| A_68_P05427993 | Magi1               | 1.336187 |
| A_68_P13172213 | Ccnf                | 1.336111 |
| A_68_P14229760 | Npas4               | 1.336014 |
| A_68_P10050034 | Trmt5               | 1.336002 |
| A_68_P10902235 | Pitx1               | 1.335996 |
| A_68_P13429542 | Pbx2                | 1.335976 |
| A_68_P08149916 | Nt5e                | 1.335937 |
| A_68_P09457380 | Adamts2             | 1.335932 |
| A_68_P08108313 | Dusp7               | 1.335891 |
| A_68_P00163908 | Twist2              | 1.335701 |

|                |                     |          |
|----------------|---------------------|----------|
| A_68_P07518222 | BC025114:843        | 1.335627 |
| A_68_P12635588 | Ehhadh              | 1.335376 |
| A_68_P00931378 | En1                 | 1.335294 |
| A_68_P05377564 | Tacstd2             | 1.335229 |
| A_68_P03350592 | Txndc12             | 1.335144 |
| A_68_P04562151 | Hsd17b11            | 1.33507  |
| A_68_P04137562 | Nupl2               | 1.335036 |
| A_68_P12862382 | ORF28               | 1.334956 |
| A_68_P01221321 | 0610011L14Rik       | 1.334937 |
| A_68_P04203215 | Rpl9-Lias           | 1.334619 |
| A_68_P07349292 | BC025816            | 1.334522 |
| A_68_P13293615 | Gbl                 | 1.33426  |
| A_68_P08995123 | Nlgn2-1810027O10Rik | 1.334214 |
| A_68_P01337579 | Dido1               | 1.334109 |
| A_68_P07697198 | Acaa1a              | 1.333893 |
| A_68_P08197986 | Snapc5              | 1.333865 |
| A_68_P14804684 | Zic3                | 1.333853 |
| A_68_P09247554 | Nf2                 | 1.333698 |
| A_68_P10666960 | Jarid2              | 1.333693 |
| A_68_P06307711 | Med25               | 1.333618 |
| A_68_P01092822 | Fmo1                | 1.333542 |
| A_68_P13388147 | Bat5                | 1.333336 |
| A_68_P03937868 | Srrm1               | 1.333314 |
| A_68_P08656295 | Phyhipl             | 1.333274 |
| A_68_P05419190 | Smarcad1            | 1.333171 |
| A_68_P14428140 | Tlx1                | 1.333111 |
| A_68_P11739540 | Gjb2                | 1.333053 |
| A_68_P02073678 | 2410042D21Rik       | 1.332855 |
| A_68_P01018072 | Ahctf1              | 1.332614 |
| A_68_P05552654 | Gabarapl1           | 1.332503 |
| A_68_P05111640 | Trim24              | 1.332475 |
| A_68_P06706577 | Irx5                | 1.332207 |
| A_68_P02151088 | Bpi                 | 1.332199 |
| A_68_P05917961 | Syt3                | 1.33197  |
| A_68_P07695540 | 2610101N10Rik       | 1.331769 |

|                |               |          |
|----------------|---------------|----------|
| A_68_P13081532 | Hmgal         | 1.331669 |
| A_68_P07036341 | Foxl1         | 1.331611 |
| A_68_P04090886 | D4Wsu114e-Fv1 | 1.331582 |
| A_68_P07723906 | Sema3f        | 1.331402 |
| A_68_P08297371 | Dip3b         | 1.331343 |
| A_68_P11213240 | Top2b         | 1.331251 |
| A_68_P04316294 | Mapre3        | 1.331193 |
| A_68_P05814338 | Pdzm3         | 1.331166 |
| A_68_P09178147 | Osm           | 1.331118 |
| A_68_P06572786 | 1500002O20Rik | 1.331002 |
| A_68_P02072158 | Hspa5         | 1.330972 |
| A_68_P14560505 | Chst7         | 1.330844 |
| A_68_P13747694 | Rnuxa         | 1.330572 |
| A_68_P03230057 | Ubiad1-Frap1  | 1.330502 |
| A_68_P14139346 | Sall3         | 1.330424 |
| A_68_P09084216 | Aebp1         | 1.330364 |
| A_68_P10219280 | Plekhg3       | 1.330362 |



**Supplementary Table 2: 437 genes that were hypermethylated in KO offspring compared with those in N offspring both on d16 and d100**

|                      |
|----------------------|
| 1110008B24Rik        |
| 1600002H07Rik        |
| 1810009A15Rik        |
| 1810043G02Rik        |
| 1810054D07Rik        |
| 2310010M24Rik        |
| 2310011J03Rik        |
| 2400001E08Rik        |
| 2400006H24Rik        |
| 2410166I05Rik        |
| 2600011E07Rik        |
| 2610042O14Rik        |
| 2810030E01Rik-Mllt10 |
| 2810432D09Rik        |
| 2810432D09Rik        |
| 2810451A06Rik        |
| 4733401H18Rik-Dalrd3 |
| 4833422F24Rik        |
| 4930418G15Rik        |
| 5033414K04Rik        |
| 5330439J01Rik        |
| 5330439J01Rik        |
| 5730419I09Rik        |
| 5730470L24Rik        |
| 5730596B20Rik        |
| 5730596K20Rik        |
| 6230410P16Rik        |
| 6530401C20Rik        |
| 9130019P16Rik        |
| A_68_P08936079       |
| A230097K15Rik        |
| Acaa1a               |
| Acat3                |

|               |
|---------------|
| Acp5          |
| Actg1         |
| Acvr1         |
| Adam12        |
| Adam12        |
| Adcy9         |
| Agpat2        |
| AI450540      |
| Akap12        |
| Akr1a4        |
| Aldh3a2       |
| Ankrd43       |
| Ap2a1         |
| Arid1a        |
| Arid1a        |
| Arid1a        |
| Arid2         |
| Arid5b        |
| Arl5c         |
| Arl5c         |
| Armet         |
| Armet         |
| Arpc1b        |
| Atoh8         |
| Atp5g2        |
| Axud1         |
| Axud1         |
| B3gnt7        |
| B3gnt7        |
| B830017H08Rik |
| Baiap2        |
| Bat5          |
| BC018371      |
| BC021891      |
| BC024139      |

|                |
|----------------|
| BC030396       |
| BC030396       |
| BC030440       |
| BC030440       |
| BC031181       |
| BC048191:-5384 |
| BC066135       |
| Birc3          |
| Brd7           |
| Bst2           |
| C230093N12Rik  |
| Camk2g         |
| Card10         |
| Cartpt         |
| Cdbl1          |
| Ccdc3          |
| Ccdc84         |
| Cck            |
| Ccnd3          |
| Ccnf           |
| Cdc20          |
| Cdc20          |
| Cdc7           |
| Cdk8           |
| Cdkn1c         |
| Chd1           |
| Chrd           |
| Clta           |
| Clta           |
| Cnm2           |
| Cops7a         |
| Cpeb1          |
| Cpn1           |
| Cpt1a          |
| Ctdsp1         |

|               |
|---------------|
| Ctnbp2nl      |
| Cxcr4         |
| Cybase3       |
| Cyld          |
| D11Ert636e    |
| D130058I21Rik |
| D130058I21Rik |
| D3Ucla1       |
| D5Wsu178e     |
| D630029K05Rik |
| D630029K05Rik |
| Ddit4         |
| Der11         |
| Dgkz          |
| Dhrs4         |
| Dmrt2         |
| Dmrt2         |
| Doc2b         |
| Dock6         |
| Dpf3          |
| Dpysl3        |
| Dusp1         |
| Dusp6         |
| Dzip1         |
| Dzip1         |
| E430028B21Rik |
| Efna1         |
| EG328479      |
| Egln3         |
| Egr2          |
| Egr3          |
| Egr3          |
| Ehd3          |
| Ehhadh        |
| Ela2          |

|               |
|---------------|
| Elov11        |
| Elov11        |
| Emid2         |
| Emid2         |
| En1           |
| En1           |
| En2           |
| En2           |
| Epha4         |
| Epha4         |
| Esrrb         |
| Etf1          |
| Etv5          |
| Etv5          |
| F730014I05Rik |
| F730014I05Rik |
| Faim2         |
| Fchsd1        |
| Fchsd1        |
| Fgf17         |
| Fgf21         |
| Fgf21-Fut1    |
| Fkbp11        |
| Fmnl1         |
| Fmo1          |
| Foxa2         |
| Foxb2         |
| Foxb2         |
| Foxb2         |
| Foxo3a        |
| Foxo6         |
| Fscn1         |
| Fscn1         |
| Fzd5          |
| Fzd5          |

|          |
|----------|
| Gadd45g  |
| Gas211   |
| Gas211   |
| Gata3    |
| Gata3    |
| Gata3    |
| Gata5    |
| Gfra4    |
| Gfra4    |
| Gja3     |
| Gjb2     |
| Gpbp1    |
| Gpre5c   |
| Gtf2h4   |
| Gzf1     |
| Hars2    |
| Hhat     |
| Hk2      |
| Hkdc1    |
| Hkr3     |
| Hmga1    |
| Hnrpd    |
| Hoxb4    |
| Hoxd3    |
| Hoxd3    |
| Hps6     |
| Hrh3     |
| Hrh3     |
| Hs6st3   |
| Hs6st3   |
| Hsd17b11 |
| Hspa12b  |
| Icmt     |
| Icmt     |
| Id3      |

|         |
|---------|
| Igf1r   |
| Igf1r   |
| Il10    |
| Ina     |
| Ina     |
| Ingl    |
| Inhbe   |
| Irf2    |
| Irx5    |
| Irx5    |
| Isl2    |
| Itih1   |
| Jarid2  |
| Jub     |
| Jub     |
| Jund1   |
| Kcnab3  |
| Khdrbs3 |
| Klf9    |
| Klh19   |
| Krt18   |
| Lama1   |
| Ldb1    |
| Ldb1    |
| Lemd1   |
| Lemd1   |
| Lgi3    |
| Lgr5    |
| Lhx1    |
| Lif     |
| Lrpprc  |
| Lrrc4c  |
| Luzp2   |
| Lynx1   |
| Magi3   |

|         |
|---------|
| Mapre3  |
| Mets2   |
| Mdm1    |
| Mfsd3   |
| Mgat2   |
| Mkln1   |
| Mon2    |
| Mvk     |
| Mxi1    |
| Myo10   |
| Myo10   |
| Myo10   |
| Myo1c   |
| Myo7a   |
| Nbl1    |
| Nek2    |
| Neud4   |
| Nfe2l1  |
| Nfe2l1  |
| Nfic    |
| Nmur1   |
| Notch1  |
| Npr2    |
| Nr1d1   |
| Nr2e3   |
| Nr2f2   |
| Nr2f2   |
| Nt5e    |
| Ntng2   |
| Oaz1    |
| Pacsin1 |
| Pacsin1 |
| Pacsin3 |
| Pah     |
| Pax6    |



|         |
|---------|
| Pcdh10  |
| Pcdh17  |
| Pcdh17  |
| Pcdhga5 |
| Pcgf2   |
| Pcgf5   |
| Pcyt1a  |
| Pcyt1a  |
| Pcyt2   |
| Pde3a   |
| Pde3a   |
| Pebp1   |
| Peci    |
| Pfn1    |
| Phactr1 |
| Phf5a   |
| Pigz    |
| Pik3r1  |
| Pitpna  |
| Pitx1   |
| Pitx1   |
| Pklr    |
| Pla1a   |
| Pla1a   |
| Pla2g2c |
| Pla2g7  |
| Plec1   |
| Plec1   |
| Plekhf1 |
| Plekhg2 |
| Plekhg2 |
| Plekhg2 |
| Pnpla2  |
| Ppa1    |
| Ppap2b  |

|          |
|----------|
| Ppap2b   |
| Ppm1k    |
| Ppp1r13b |
| Ppp2r2d  |
| Ppp2r5c  |
| Pptc7    |
| Pptc7    |
| Prdm1    |
| Prdm5    |
| Prodh    |
| Psmd11   |
| Ptger1   |
| Ptprs    |
| Qdpr     |
| Rad9     |
| Rassf3   |
| Raver1   |
| Rbm35a   |
| Rbm9     |
| Rcc2     |
| Rcor2    |
| Rdh7     |
| Rgs6     |
| Rnf121   |
| Rnf135   |
| Rnf185   |
| Rnuxa    |
| Rpl35    |
| Rpp14    |
| Saa4     |
| Sall4    |
| Scube3   |
| Scube3   |
| Scyl2    |
| Sepx1    |

|          |
|----------|
| Sfrs2ip  |
| Sgk      |
| Sh2b2    |
| Sh3pxd2a |
| Shc4     |
| Six1     |
| Six1     |
| Six1     |
| Slc10a6  |
| Slc10a6  |
| Slc23a2  |
| Slc25a29 |
| Slc2a9   |
| Slc2a9   |
| Slc35c1  |
| Slc38a3  |
| Slc44a2  |
| Smad6    |
| Smarcc2  |
| Smarcc2  |
| Smug1    |
| Snf1lk   |
| Sox2     |
| Sphk2    |
| Sphk2    |
| Spnb2    |
| Spryd4   |
| Srebf1   |
| Srebf1   |
| Srebf1   |
| Srrm1    |
| St3gal3  |
| Stk11    |
| Stk11    |
| Sulf2    |

|           |
|-----------|
| Sulf2     |
| Syngn1    |
| Tal2      |
| Tbl1xr1   |
| Tbx3      |
| Tcba1     |
| Tcf2      |
| Tcf7      |
| Tcfap2c   |
| Terf2     |
| Tgm4      |
| Tle4      |
| Tle4      |
| Tmem132a  |
| Tmem26    |
| Tnfrsf19l |
| Tnfrsf19l |
| Tob2      |
| Tpd52     |
| Tpt1      |
| Trhde     |
| Trmt5     |
| Tssk4     |
| Ttc12     |
| Ttc33     |
| Twist2    |
| U46068    |
| Uap1      |
| Uap1      |
| Ube2j2    |
| Ube2j2    |
| Ung       |
| Ung       |
| Usp2      |
| Vps33b    |

|         |
|---------|
| Wasf3   |
| Wnt2b   |
| Wnt6    |
| Yap1    |
| Ypel4   |
| Ypel4   |
| Yy1     |
| Zan     |
| Zc3h11a |
| Zdhhc18 |
| Zdhhc7  |
| Zfp503  |
| Zfp503  |
| Zfp710  |
| Zmynd10 |
| Zswim5  |
| Zswim5  |
| Zswim5  |
| Zyx     |

**Supplementary Table 3a: KOA vs KO 716 hypomethylation genes on d16**

| Probe Name     | Gene Name              | Methylation difference value |
|----------------|------------------------|------------------------------|
| A_68_P04039916 | Nadk                   | 0.33438                      |
| A_68_P13790503 | 3110002H16Rik          | 0.335319                     |
| A_68_P04677936 | Polr2j                 | 0.373654                     |
| A_68_P04737532 | Cds1                   | 0.379397                     |
| A_68_P11801698 | Pou4f1                 | 0.380366                     |
| A_68_P04039916 | Nadk                   | 0.384251                     |
| A_68_P03848124 | Musk                   | 0.386288                     |
| A_68_P04895996 | Mapk10                 | 0.3874                       |
| A_68_P10347437 | Pax9                   | 0.392248                     |
| A_68_P06926959 | Nob1                   | 0.403682                     |
| A_68_P13286098 | Enpp4                  | 0.403829                     |
| A_68_P07165457 | Ints10                 | 0.411601                     |
| A_68_P04621660 | BC003324-6330548G22Rik | 0.413014                     |
| A_68_P01769357 | Mrg1                   | 0.417223                     |
| A_68_P02043611 | Disp2                  | 0.420546                     |
| A_68_P07218631 | Dusp4                  | 0.427754                     |
| A_68_P06513729 | E2f8                   | 0.431134                     |
| A_68_P10030624 | AW125753               | 0.431589                     |
| A_68_P03939278 | Glipr2                 | 0.432663                     |
| A_68_P10878754 | Cks2                   | 0.433079                     |
| A_68_P03695515 | Lrrc47                 | 0.439032                     |
| A_68_P09713729 | Emid1                  | 0.439182                     |
| A_68_P09322906 | Lhx1                   | 0.443472                     |
| A_68_P05422385 | Dppa3                  | 0.444436                     |
| A_68_P08466857 | Lrig3                  | 0.445734                     |
| A_68_P08514851 | Nr2e1                  | 0.447573                     |
| A_68_P10140483 | Rrm2                   | 0.448763                     |
| A_68_P04234539 | Pdx1                   | 0.451351                     |
| A_68_P13890291 | BC019561               | 0.452449                     |
| A_68_P08981068 | Pip5k2b                | 0.452795                     |
| A_68_P04621660 | BC003324-6330548G22Rik | 0.454152                     |
| A_68_P10941074 | Zfyve16                | 0.458803                     |
| A_68_P11235588 | Ccdc122                | 0.459644                     |

|                |                      |          |
|----------------|----------------------|----------|
| A_68_P06751865 | Slc7a6               | 0.460285 |
| A_68_P10435877 | Matn3                | 0.461617 |
| A_68_P14335316 | D19Wsul62e           | 0.464013 |
| A_68_P14280877 | Mxi1                 | 0.46806  |
| A_68_P09177142 | Mpp3                 | 0.470142 |
| A_68_P09399954 | Znhit3               | 0.470294 |
| A_68_P04286123 | Art3                 | 0.472642 |
| A_68_P07991425 | Zic1                 | 0.473978 |
| A_68_P13797523 | Pcdhga6              | 0.476046 |
| A_68_P02367976 | Isg20l2              | 0.476351 |
| A_68_P08061094 | 2810417H13Rik        | 0.476609 |
| A_68_P00783773 | Ahctf1               | 0.477431 |
| A_68_P02305769 | Pld1                 | 0.478533 |
| A_68_P04568812 | Hdh                  | 0.479961 |
| A_68_P00882730 | Rnasel               | 0.48209  |
| A_68_P13323539 | Mapk14               | 0.483075 |
| A_68_P09250456 | Hoxb8                | 0.483086 |
| A_68_P01173264 | Dynlrb1              | 0.483994 |
| A_68_P09477297 | Hoxb5                | 0.485658 |
| A_68_P11564443 | 9430077A04Rik-Prrxl1 | 0.487194 |
| A_68_P00674953 | Tor3a                | 0.490288 |
| A_68_P07861271 | Oaz2                 | 0.491995 |
| A_68_P12887986 | Bcl6                 | 0.492441 |
| A_68_P07349283 | Rbm13                | 0.492655 |
| A_68_P10631307 | Otp                  | 0.495329 |
| A_68_P05213176 | Vamp8                | 0.496142 |
| A_68_P07862963 | lhpk2                | 0.496748 |
| A_68_P04917693 | Eif3s9               | 0.49723  |
| A_68_P03722059 | Dhrs3                | 0.498595 |
| A_68_P13298312 | Epas1                | 0.498837 |
| A_68_P10193185 | Plek2                | 0.499316 |
| A_68_P03307855 | Hp1bp3               | 0.503824 |
| A_68_P12968677 | Opa1                 | 0.504315 |
| A_68_P12536557 | BC027231             | 0.50987  |
| A_68_P03208679 | Hes5                 | 0.509889 |

|                |               |          |
|----------------|---------------|----------|
| A_68_P03944620 | E130114P18Rik | 0.51431  |
| A_68_P07041328 | Tll1          | 0.514337 |
| A_68_P12836214 | Setd4-Cbr1    | 0.515803 |
| A_68_P11653564 | Rhobtb2       | 0.516433 |
| A_68_P02650795 | Setd7         | 0.516998 |
| A_68_P09049964 | Gria1         | 0.517365 |
| A_68_P00572751 | Cfc1          | 0.517766 |
| A_68_P07550953 | Zfp445        | 0.517841 |
| A_68_P11145651 | Klf5          | 0.520795 |
| A_68_P06907386 | Mrps31        | 0.522736 |
| A_68_P06127908 | Pak1          | 0.523321 |
| A_68_P06506665 | Apoe          | 0.52476  |
| A_68_P04480991 | Wfs1          | 0.526861 |
| A_68_P02755413 | Polr3gl       | 0.527058 |
| A_68_P03123565 | She           | 0.527206 |
| A_68_P08694627 | Dna21         | 0.52751  |
| A_68_P08215908 | Suox          | 0.528381 |
| A_68_P11350422 | Anxa7         | 0.530776 |
| A_68_P11656442 | Gfra2         | 0.532242 |
| A_68_P13251243 | Cyp4f13       | 0.535215 |
| A_68_P03968118 | Car8          | 0.535363 |
| A_68_P09568010 | Ormdl3        | 0.535565 |
| A_68_P00931382 | En1           | 0.536037 |
| A_68_P13255091 | Pcaf          | 0.536308 |
| A_68_P03771652 | Tmem68        | 0.536744 |
| A_68_P04480991 | Wfs1          | 0.538198 |
| A_68_P13032833 | Eif2b5        | 0.538408 |
| A_68_P13696223 | Onecut2       | 0.538472 |
| A_68_P03944620 | E130114P18Rik | 0.53884  |
| A_68_P05951989 | Bub3          | 0.53905  |
| A_68_P03208679 | Hes5          | 0.539328 |
| A_68_P04039488 | 9630013D21Rik | 0.539866 |
| A_68_P12636173 | Lsg1          | 0.540489 |
| A_68_P07036094 | Mcm5          | 0.543046 |
| A_68_P04926197 | Fzd10         | 0.543071 |



|                |                          |          |
|----------------|--------------------------|----------|
| A_68_P04398639 | Evi5                     | 0.544129 |
| A_68_P02983152 | Pcdh10                   | 0.544519 |
| A_68_P11483530 | Ebf2                     | 0.545231 |
| A_68_P09273682 | Becn1                    | 0.545993 |
| A_68_P00576308 | Mosc2                    | 0.547011 |
| A_68_P01617284 | 4930402H24Rik            | 0.547219 |
| A_68_P05889182 | Xrcc1                    | 0.547257 |
| A_68_P14431113 | Mxi1                     | 0.549289 |
| A_68_P10157596 | Dicer1                   | 0.550286 |
| A_68_P11079538 | Sirt5                    | 0.550441 |
| A_68_P08701847 | Rbms2                    | 0.550909 |
| A_68_P09245911 | Ifi47                    | 0.55136  |
| A_68_P06428107 | Zfp36                    | 0.553325 |
| A_68_P02173326 | Smtnl1-Timm10            | 0.554928 |
| A_68_P02938391 | Tmem79-Smg5              | 0.556032 |
| A_68_P12550711 | Stch                     | 0.556045 |
| A_68_P08532207 | Slc35e3                  | 0.556395 |
| A_68_P00581118 | Rbbp5                    | 0.556687 |
| A_68_P13551633 | Socs5                    | 0.562088 |
| A_68_P03353696 | Sdc3                     | 0.562721 |
| A_68_P09018865 | Cbx4                     | 0.564329 |
| A_68_P14979287 | Kif4                     | 0.56485  |
| A_68_P10857139 | Cdc14b                   | 0.56525  |
| A_68_P14108737 | ENSMUST00000083658.1:429 | 0.566965 |
| A_68_P00303096 | Lamc2                    | 0.567207 |
| A_68_P01085703 | Ptp4a1                   | 0.567396 |
| A_68_P06599540 | Armc5                    | 0.567641 |
| A_68_P15175265 | Tefe3                    | 0.567909 |
| A_68_P11450608 | Rhobtb2                  | 0.568469 |
| A_68_P07096563 | B130050I23Rik            | 0.568706 |
| A_68_P11069441 | Plk2                     | 0.568849 |
| A_68_P02940604 | Mgst2                    | 0.570302 |
| A_68_P05715101 | Xpc                      | 0.570338 |
| A_68_P13515259 | Pim1                     | 0.570383 |
| A_68_P11505019 | Zfp503                   | 0.571278 |

|                |                 |          |
|----------------|-----------------|----------|
| A_68_P14458023 | Prkg1           | 0.572162 |
| A_68_P07339397 | 4921524J17Rik   | 0.572609 |
| A_68_P11419740 | Nkx3-1          | 0.573838 |
| A_68_P00149897 | Tagln2          | 0.574717 |
| A_68_P12816944 | Ephb3           | 0.575738 |
| A_68_P03819892 | 4922503N01Rik   | 0.576167 |
| A_68_P02189368 | Eif2ak4         | 0.576285 |
| A_68_P12755374 | App             | 0.577126 |
| A_68_P14438125 | Actr1a          | 0.577142 |
| A_68_P09591872 | Nsg2            | 0.577258 |
| A_68_P02455823 | Polr3gl         | 0.577305 |
| A_68_P13883491 | Pcdha9          | 0.577378 |
| A_68_P12853498 | Mx2             | 0.578649 |
| A_68_P00242827 | EG277333        | 0.578667 |
| A_68_P12063911 | A_68_P12063911  | 0.579329 |
| A_68_P07835083 | Entpd3          | 0.579778 |
| A_68_P05885506 | Dbx1            | 0.580525 |
| A_68_P11752826 | Socs4           | 0.580606 |
| A_68_P11111042 | Tcfap2a         | 0.581459 |
| A_68_P07893192 | Folr4           | 0.58195  |
| A_68_P09437147 | Pfn1-Eno3       | 0.582255 |
| A_68_P01127576 | Tsga10-EG623661 | 0.58265  |
| A_68_P03127713 | Sox2            | 0.582879 |
| A_68_P01725957 | Pfdn4           | 0.583498 |
| A_68_P01197065 | 2700007P21Rik   | 0.584847 |
| A_68_P13895708 | Slc12a2         | 0.584985 |
| A_68_P09474540 | Hoxb3           | 0.58501  |
| A_68_P09997292 | Id2             | 0.585413 |
| A_68_P01963949 | Rbm39           | 0.585492 |
| A_68_P00206509 | St8sia4         | 0.585526 |
| A_68_P02060987 | Defb25-Rem1     | 0.585842 |
| A_68_P06266771 | Ilk             | 0.586458 |
| A_68_P00588267 | Cflar           | 0.586902 |
| A_68_P04586625 | Fbxl10          | 0.587923 |
| A_68_P05970380 | Capns1          | 0.588775 |

|                |                            |          |
|----------------|----------------------------|----------|
| A_68_P10895011 | Cltb                       | 0.590025 |
| A_68_P08999972 | Tbx21                      | 0.590125 |
| A_68_P08621597 | D10Wsu102e                 | 0.593262 |
| A_68_P07788751 | 1300017J02Rik              | 0.59338  |
| A_68_P06294286 | Epn1                       | 0.594456 |
| A_68_P10301168 | Tgfb3-1700019E19Rik        | 0.595093 |
| A_68_P08815423 | Tsfm                       | 0.595449 |
| A_68_P10341311 | Vsnl1                      | 0.595459 |
| A_68_P10745919 | Ipo11                      | 0.597311 |
| A_68_P07498420 | Sin3a                      | 0.597796 |
| A_68_P08890336 | Spock2                     | 0.600832 |
| A_68_P04040117 | 4732473B16Rik              | 0.60207  |
| A_68_P07361088 | Rhou                       | 0.602513 |
| A_68_P08172363 | Spa17                      | 0.602686 |
| A_68_P13117095 | Bak1                       | 0.603753 |
| A_68_P05912818 | Mkrm3                      | 0.603907 |
| A_68_P08656285 | Phyhipl                    | 0.604453 |
| A_68_P05416729 | Cxcl12                     | 0.604653 |
| A_68_P03751631 | Zc3h12a                    | 0.604911 |
| A_68_P05807222 | Trim24                     | 0.604918 |
| A_68_P06284631 | Tbc1d17                    | 0.605519 |
| A_68_P01943851 | AA467197                   | 0.605597 |
| A_68_P10205319 | Yy1                        | 0.606662 |
| A_68_P00820783 | Capn8                      | 0.606844 |
| A_68_P04000865 | Rnf207-Rpl22               | 0.607215 |
| A_68_P07554616 | Rbms3                      | 0.607697 |
| A_68_P09078515 | Meis1                      | 0.608781 |
| A_68_P14160293 | Emx2                       | 0.609316 |
| A_68_P00316905 | Tcfcp211                   | 0.610395 |
| A_68_P07853424 | Cgnl1                      | 0.610782 |
| A_68_P11073758 | Zfp366                     | 0.611014 |
| A_68_P12487908 | 1700021K19Rik-Fytd1        | 0.611418 |
| A_68_P04970366 | Chst12                     | 0.612011 |
| A_68_P01454242 | ENSMUST00000083520.1:-1564 | 0.612698 |
| A_68_P03685403 | Dmrta2                     | 0.613915 |

|                |                            |          |
|----------------|----------------------------|----------|
| A_68_P08077145 | Nedd4                      | 0.614169 |
| A_68_P03079741 | Map2k1ip1                  | 0.615654 |
| A_68_P01569256 | Traf6                      | 0.616308 |
| A_68_P03353902 | 1110049F12Rik              | 0.61634  |
| A_68_P08395277 | Smarcc2                    | 0.61691  |
| A_68_P12901529 | Hunk                       | 0.617503 |
| A_68_P04340618 | Ung                        | 0.617519 |
| A_68_P07950291 | Sh3px3                     | 0.617946 |
| A_68_P02110665 | Stam2                      | 0.618036 |
| A_68_P06099522 | Apoc1                      | 0.618205 |
| A_68_P00236760 | Tmem163                    | 0.618859 |
| A_68_P11137005 | Spry2                      | 0.618875 |
| A_68_P11516634 | Plekhc1                    | 0.618895 |
| A_68_P09038979 | Kremen1                    | 0.618943 |
| A_68_P03685403 | Dmrta2                     | 0.6193   |
| A_68_P14350160 | Gfra1                      | 0.619379 |
| A_68_P05732741 | Ccnd2                      | 0.619453 |
| A_68_P08997356 | Ankrd40                    | 0.620263 |
| A_68_P13067632 | Pkd1                       | 0.62063  |
| A_68_P14385037 | Smarca2                    | 0.621384 |
| A_68_P07614034 | Jam3                       | 0.621407 |
| A_68_P14257641 | Stambpl1                   | 0.621458 |
| A_68_P14802381 | Plxna3                     | 0.622124 |
| A_68_P13643168 | Gata6                      | 0.6229   |
| A_68_P01011002 | Elk4                       | 0.622918 |
| A_68_P13330489 | Ehd3                       | 0.623348 |
| A_68_P10556075 | Hivep1                     | 0.623367 |
| A_68_P09817295 | Dlst                       | 0.623716 |
| A_68_P13006429 | Ufd11                      | 0.623814 |
| A_68_P07179412 | Rbpms                      | 0.623953 |
| A_68_P09632282 | Dusp3                      | 0.624543 |
| A_68_P10265199 | Kns2                       | 0.624648 |
| A_68_P00129085 | 1110058L19Rik              | 0.624708 |
| A_68_P11828305 | ENSMUST00000083663.1:-2499 | 0.625622 |
| A_68_P03211661 | 2610204G22Rik              | 0.625705 |

|                |               |          |
|----------------|---------------|----------|
| A_68_P09805220 | Trib2         | 0.6261   |
| A_68_P01641588 | Serinc3       | 0.626813 |
| A_68_P04178087 | Phox2b        | 0.626975 |
| A_68_P02251924 | Uckl1         | 0.627475 |
| A_68_P12422403 | Ep300         | 0.627625 |
| A_68_P07491070 | Ephb1         | 0.629197 |
| A_68_P11922964 | Klf10         | 0.630402 |
| A_68_P08778846 | Gja1          | 0.630408 |
| A_68_P11739627 | Gata4         | 0.631572 |
| A_68_P00494851 | Degs1         | 0.631716 |
| A_68_P08284201 | Wif1          | 0.631745 |
| A_68_P03869852 | Pax7          | 0.631814 |
| A_68_P06934687 | Jph3          | 0.632188 |
| A_68_P04040117 | 4732473B16Rik | 0.632617 |
| A_68_P06874491 | 3110005G23Rik | 0.632634 |
| A_68_P14115940 | Smad7         | 0.633235 |
| A_68_P14187519 | Lbx1          | 0.633418 |
| A_68_P02617476 | Uox           | 0.63346  |
| A_68_P14385433 | Pik3ap1       | 0.634476 |
| A_68_P03628649 | Toe1-Mutyh    | 0.63461  |
| A_68_P08256155 | Moxd1         | 0.635139 |
| A_68_P07791783 | Suhw4         | 0.635868 |
| A_68_P04562414 | Stx1a         | 0.636046 |
| A_68_P08803717 | Hsd17b6       | 0.63753  |
| A_68_P13439820 | Ptprs         | 0.638461 |
| A_68_P07923222 | AI593442      | 0.638891 |
| A_68_P13883460 | Pcdha9        | 0.638949 |
| A_68_P04575353 | Gbas          | 0.639651 |
| A_68_P15201288 | Zfx           | 0.639693 |
| A_68_P07813354 | Gclc          | 0.640072 |
| A_68_P14735269 | Gria3         | 0.640582 |
| A_68_P06320275 | Cyfip1        | 0.6408   |
| A_68_P08156834 | 1110032A03Rik | 0.640898 |
| A_68_P00934875 | Rxrg          | 0.64105  |
| A_68_P00718610 | Rrs1          | 0.641141 |

|                |                 |          |
|----------------|-----------------|----------|
| A_68_P11539394 | Gpc5            | 0.641244 |
| A_68_P09314768 | Grn             | 0.641465 |
| A_68_P04365068 | Klb             | 0.641597 |
| A_68_P03342791 | Arhgef19        | 0.642442 |
| A_68_P10913242 | Wrnip1          | 0.642767 |
| A_68_P05939018 | A630091E08Rik   | 0.643065 |
| A_68_P05217166 | Ephb6           | 0.643151 |
| A_68_P06592634 | Cd3eap-Ppp1r13l | 0.643194 |
| A_68_P00793519 | Ihh             | 0.64424  |
| A_68_P02153759 | Cstf3           | 0.644402 |
| A_68_P06168319 | Isg2011         | 0.644571 |
| A_68_P14121622 | Tcof1           | 0.64622  |
| A_68_P05793539 | Cpa1            | 0.647262 |
| A_68_P08248934 | Tmpo            | 0.647564 |
| A_68_P03211661 | 2610204G22Rik   | 0.647882 |
| A_68_P05565689 | Ptms            | 0.64816  |
| A_68_P04455959 | Zfp469          | 0.649303 |
| A_68_P04734427 | Shroom3         | 0.649304 |
| A_68_P13266254 | Thbs2           | 0.649436 |
| A_68_P11082814 | Snag1           | 0.649618 |
| A_68_P09483214 | Hist3h2a        | 0.649656 |
| A_68_P12049849 | Mpped1          | 0.649965 |
| A_68_P00214091 | Pkp1            | 0.649972 |
| A_68_P07010147 | Hand2           | 0.65002  |
| A_68_P06173453 | 2310008H09Rik   | 0.65024  |
| A_68_P03566955 | Fbxo42          | 0.650412 |
| A_68_P07716416 | Crtap           | 0.650597 |
| A_68_P02254945 | Coq4            | 0.650854 |
| A_68_P05138561 | Cdkn1b          | 0.651146 |
| A_68_P13019175 | Pcnp            | 0.651152 |
| A_68_P11700529 | Cacna2d3        | 0.651248 |
| A_68_P01718593 | Rexo4-Adamts13  | 0.651473 |
| A_68_P13523043 | Akap8l          | 0.651674 |
| A_68_P08277015 | Cart1           | 0.651726 |
| A_68_P13251244 | Cyp4f13         | 0.651959 |

|                |                            |          |
|----------------|----------------------------|----------|
| A_68_P03041147 | Sfrp2                      | 0.652126 |
| A_68_P03738874 | Ambp                       | 0.652361 |
| A_68_P13339417 | ENSMUST00000086914.3:-1812 | 0.652432 |
| A_68_P04978120 | Fosl2                      | 0.652592 |
| A_68_P08530152 | Cnn2                       | 0.652908 |
| A_68_P05547385 | Gprin3                     | 0.653193 |
| A_68_P15093622 | Nxt2                       | 0.654235 |
| A_68_P08538267 | Gnptab                     | 0.654511 |
| A_68_P01592489 | Ehf                        | 0.654882 |
| A_68_P04011260 | 6230416J20Rik              | 0.655016 |
| A_68_P12958415 | Alg3-1810009K13Rik         | 0.655359 |
| A_68_P14494409 | Dmrt2                      | 0.656318 |
| A_68_P03505622 | E2f2                       | 0.656864 |
| A_68_P03228980 | Acot7                      | 0.658109 |
| A_68_P14979296 | Pdzd11                     | 0.658331 |
| A_68_P11347694 | Bmpr1a                     | 0.659216 |
| A_68_P05452380 | Znrf2                      | 0.659383 |
| A_68_P02737741 | Psm4                       | 0.659422 |
| A_68_P03127703 | Sox2                       | 0.660056 |
| A_68_P14780157 | MGC107702                  | 0.661264 |
| A_68_P06409764 | Atp2a1                     | 0.661951 |
| A_68_P03444650 | Tmem67-C430048L16Rik       | 0.662466 |
| A_68_P00064672 | Cd55                       | 0.662967 |
| A_68_P04010940 | Foxd2                      | 0.663192 |
| A_68_P08618192 | Atcay-9130206N08Rik        | 0.664072 |
| A_68_P06625976 | Lypd4                      | 0.664282 |
| A_68_P03810519 | Zcchc7                     | 0.664435 |
| A_68_P13722576 | Zfp532                     | 0.664456 |
| A_68_P09099826 | Srebf1                     | 0.665382 |
| A_68_P13158664 | 1300003B13Rik              | 0.665569 |
| A_68_P05974477 | A630091E08Rik              | 0.665787 |
| A_68_P06053252 | 3200002M19Rik              | 0.666145 |
| A_68_P00408838 | Cspp1                      | 0.666217 |
| A_68_P01348198 | Surf6                      | 0.666297 |
| A_68_P14171227 | Sfxn4                      | 0.666378 |

|                |                     |          |
|----------------|---------------------|----------|
| A_68_P14889744 | Midlip1             | 0.667118 |
| A_68_P12871003 | Sema5b              | 0.668721 |
| A_68_P06193351 | Dmpk                | 0.668908 |
| A_68_P07263029 | Cenpt               | 0.669163 |
| A_68_P10860226 | Gmpr                | 0.670033 |
| A_68_P05950422 | Smpd1               | 0.670039 |
| A_68_P13300318 | Tsga2               | 0.670137 |
| A_68_P03953505 | Ppp1r8              | 0.671041 |
| A_68_P09440235 | Ehbp1               | 0.671147 |
| A_68_P08187608 | Pml                 | 0.671575 |
| A_68_P02312655 | Tbx15               | 0.672018 |
| A_68_P03041132 | Sfrp2               | 0.672037 |
| A_68_P10730038 | Tbce                | 0.672223 |
| A_68_P04844132 | Cxcl4               | 0.672474 |
| A_68_P05102045 | Sec13               | 0.673579 |
| A_68_P14448901 | Ints5               | 0.673908 |
| A_68_P11569895 | Ppyr1               | 0.674548 |
| A_68_P04859957 | Slc12a9             | 0.67466  |
| A_68_P09436612 | Adra1b              | 0.675091 |
| A_68_P07540084 | AW551984            | 0.675487 |
| A_68_P04460830 | Mospd3              | 0.675602 |
| A_68_P06208765 | Prmt1               | 0.676579 |
| A_68_P12214035 | Creld2              | 0.676927 |
| A_68_P06583785 | Pvrl2               | 0.677409 |
| A_68_P01079257 | Fzd7                | 0.677878 |
| A_68_P03156403 | Palmd               | 0.678009 |
| A_68_P05891727 | Grik5-Zfp574        | 0.678212 |
| A_68_P06490200 | 2410015N17Rik       | 0.678538 |
| A_68_P09395674 | 1700007I06Rik-Stk10 | 0.679022 |
| A_68_P11971534 | Kcns2               | 0.679256 |
| A_68_P04893782 | Snx8                | 0.679478 |
| A_68_P06962856 | Lig4                | 0.679523 |
| A_68_P07558348 | Lbxcor1             | 0.679531 |
| A_68_P09656833 | Agxt2l2             | 0.680108 |
| A_68_P10466438 | Ptch1               | 0.680343 |



|                |               |          |
|----------------|---------------|----------|
| A_68_P08761742 | 5330438D12Rik | 0.681098 |
| A_68_P06939996 | Il15          | 0.681167 |
| A_68_P04277065 | Cxcl1         | 0.681199 |
| A_68_P00451766 | Nmnat2        | 0.681712 |
| A_68_P01984542 | 1700011J10Rik | 0.682102 |
| A_68_P06662895 | Art2b         | 0.682536 |
| A_68_P01943849 | AA467197      | 0.682699 |
| A_68_P13383251 | H2-T24        | 0.682821 |
| A_68_P07618605 | Gnai2         | 0.683057 |
| A_68_P12140837 | Eif3s6ip      | 0.683122 |
| A_68_P06771773 | Snape2        | 0.683176 |
| A_68_P06788634 | BC021891      | 0.683224 |
| A_68_P05461992 | EG232599      | 0.683441 |
| A_68_P05439808 | Irak2         | 0.683478 |
| A_68_P11925010 | Ppara         | 0.683579 |
| A_68_P05872318 | Scnn1a        | 0.684243 |
| A_68_P13978271 | Mkx           | 0.684545 |
| A_68_P12648829 | Gp5           | 0.685045 |
| A_68_P04926190 | Fzd10         | 0.685184 |
| A_68_P04120983 | Mad11l        | 0.686045 |
| A_68_P03293677 | Slc35a1       | 0.686215 |
| A_68_P02404444 | Cxxc4         | 0.686707 |
| A_68_P07505359 | Eif3s4        | 0.686787 |
| A_68_P02798117 | Slc7a11       | 0.687623 |
| A_68_P00270265 | Slc41a1       | 0.687973 |
| A_68_P05905001 | Ccnd1         | 0.688101 |
| A_68_P07300676 | 4930402E16Rik | 0.689211 |
| A_68_P14001180 | Aldh7a1       | 0.689492 |
| A_68_P13897671 | Tnfaip8       | 0.689506 |
| A_68_P04607968 | Rpl6          | 0.689697 |
| A_68_P06846135 | Fbxl8         | 0.689719 |
| A_68_P03843631 | BC025833      | 0.68999  |
| A_68_P07513274 | Pcolce2       | 0.690596 |
| A_68_P11108180 | Nup153        | 0.69145  |
| A_68_P09651374 | Actg1         | 0.69275  |

|                |               |          |
|----------------|---------------|----------|
| A_68_P12281826 | Grhl2         | 0.693157 |
| A_68_P00221558 | Prrx1         | 0.693164 |
| A_68_P07251405 | Foxfla        | 0.693441 |
| A_68_P01486057 | Samhd1        | 0.693737 |
| A_68_P01736457 | Ypel4         | 0.693764 |
| A_68_P01299887 | Hoxd3         | 0.693943 |
| A_68_P06045434 | Frag1         | 0.694189 |
| A_68_P13295845 | Pdpk1         | 0.69448  |
| A_68_P06226765 | 1810054G18Rik | 0.69478  |
| A_68_P01470481 | Cse11         | 0.695074 |
| A_68_P12971556 | Ifngr2        | 0.695351 |
| A_68_P12066484 | Hoxc10        | 0.696375 |
| A_68_P03093929 | Prpf38b       | 0.69639  |
| A_68_P07922098 | Rbm7          | 0.696685 |
| A_68_P10111464 | Prima1        | 0.697769 |
| A_68_P11546934 | Dlg7          | 0.698061 |
| A_68_P06887581 | Hsf4          | 0.698102 |
| A_68_P02436074 | Ccbl2         | 0.698306 |
| A_68_P01949031 | Mdk           | 0.698454 |
| A_68_P03854451 | BC003266      | 0.698745 |
| A_68_P09038027 | Igf2bp1       | 0.69921  |
| A_68_P14030415 | Etf1          | 0.699245 |
| A_68_P10006538 | Rps6ka5       | 0.699632 |
| A_68_P04859957 | Slc12a9       | 0.699783 |
| A_68_P04901404 | Tmem142a      | 0.699961 |
| A_68_P05808775 | Bhlhb2        | 0.699968 |
| A_68_P06095045 | Aldoa         | 0.700418 |
| A_68_P09533960 | Dusp14        | 0.700664 |
| A_68_P14525996 | Timm8a1       | 0.701036 |
| A_68_P07299665 | Nfix          | 0.701278 |
| A_68_P06928235 | Spire2        | 0.701613 |
| A_68_P07910201 | Lyzl4         | 0.701688 |
| A_68_P04350697 | Gtf2i         | 0.702071 |
| A_68_P03900317 | Prpf38a       | 0.702588 |
| A_68_P09739930 | Hoxb7         | 0.70278  |

|                |                      |          |
|----------------|----------------------|----------|
| A_68_P03953505 | Ppp1r8               | 0.702818 |
| A_68_P11585136 | Nupl1                | 0.70289  |
| A_68_P03647830 | Kti12                | 0.702928 |
| A_68_P13107839 | Abcg8                | 0.703674 |
| A_68_P11534471 | Lgals3               | 0.703816 |
| A_68_P02123034 | Zfhx1b               | 0.704136 |
| A_68_P09541955 | Map2k6               | 0.70421  |
| A_68_P07679434 | Atp1b3               | 0.704446 |
| A_68_P15209143 | Plp2                 | 0.704493 |
| A_68_P09195114 | A830031A19Rik-Bcl11a | 0.704913 |
| A_68_P09914489 | Daam1                | 0.705003 |
| A_68_P12212512 | Amigo2               | 0.705003 |
| A_68_P14549390 | Zic3                 | 0.705168 |
| A_68_P10277800 | Myt1l                | 0.705632 |
| A_68_P08764275 | Csnk1g2              | 0.70566  |
| A_68_P12334898 | Zhx2                 | 0.706078 |
| A_68_P06412434 | Bnc1                 | 0.706683 |
| A_68_P08479961 | Slc19a1              | 0.706875 |
| A_68_P04553689 | Cenpc1-AI586015      | 0.707637 |
| A_68_P09926633 | BC048191:-3942       | 0.707901 |
| A_68_P04522816 | Pdx1                 | 0.707962 |
| A_68_P10300471 | D230037D09Rik        | 0.708385 |
| A_68_P05529381 | Rerg                 | 0.708454 |
| A_68_P06986126 | Ppp2cb               | 0.70891  |
| A_68_P06789607 | Kcng4                | 0.70991  |
| A_68_P13976398 | Csnk1a1              | 0.710593 |
| A_68_P07757445 | Rab3d                | 0.711037 |
| A_68_P00041396 | Mgat4a               | 0.711187 |
| A_68_P04081654 | Dio1                 | 0.711219 |
| A_68_P03900317 | Prpf38a              | 0.711558 |
| A_68_P09937351 | Flrt2                | 0.711792 |
| A_68_P05987685 | Olfir503             | 0.712091 |
| A_68_P13896689 | Zfp516               | 0.712217 |
| A_68_P14255652 | Cybas3               | 0.712276 |
| A_68_P11855909 | Ly6d                 | 0.712405 |

|                |                            |          |
|----------------|----------------------------|----------|
| A_68_P15089789 | EG546088                   | 0.712543 |
| A_68_P13282822 | Qk                         | 0.712736 |
| A_68_P14918058 | Ap1s2                      | 0.713621 |
| A_68_P10838522 | Jarid2                     | 0.713903 |
| A_68_P09995749 | Ppmla                      | 0.71459  |
| A_68_P07813357 | A_68_P07813357             | 0.71467  |
| A_68_P07134632 | Rbm35b                     | 0.715007 |
| A_68_P00834946 | Copa                       | 0.715046 |
| A_68_P11559162 | Nid2                       | 0.715649 |
| A_68_P12386971 | Ank                        | 0.715761 |
| A_68_P08653425 | Sh3md4                     | 0.71583  |
| A_68_P05976681 | C330005M16Rik              | 0.716371 |
| A_68_P08967215 | Grik2                      | 0.716681 |
| A_68_P00588306 | Slco5a1                    | 0.717103 |
| A_68_P13906889 | Sall3                      | 0.717174 |
| A_68_P04247170 | Zfp326                     | 0.717347 |
| A_68_P09031100 | Myo1c                      | 0.717408 |
| A_68_P04487381 | 1110008J03Rik              | 0.717462 |
| A_68_P09521694 | 1110014K08Rik              | 0.717536 |
| A_68_P01182959 | Nfatc2                     | 0.717548 |
| A_68_P05627272 | Galnact2                   | 0.718159 |
| A_68_P10269934 | Evl                        | 0.718532 |
| A_68_P01717991 | Btbd14a                    | 0.718559 |
| A_68_P04606873 | Scarb2                     | 0.718806 |
| A_68_P09412315 | Ube2b-Cdk13                | 0.718836 |
| A_68_P04350697 | Gtf2i                      | 0.71887  |
| A_68_P03602815 | Htr1d                      | 0.718974 |
| A_68_P06483147 | 2310044H10Rik              | 0.71928  |
| A_68_P06201943 | Usp47                      | 0.719311 |
| A_68_P00590849 | Ncl                        | 0.719372 |
| A_68_P10723432 | Zfp817                     | 0.719681 |
| A_68_P07561235 | Hspa8                      | 0.719709 |
| A_68_P10072364 | ENSMUST00000083499.1:-3315 | 0.72005  |
| A_68_P12761113 | Stch                       | 0.720295 |
| A_68_P09132227 | Cacng4                     | 0.720326 |

|                |            |          |
|----------------|------------|----------|
| A_68_P02269102 | Arl5a      | 0.720427 |
| A_68_P00245688 | Ttll4      | 0.720452 |
| A_68_P10137568 | Fbln5      | 0.720729 |
| A_68_P04723864 | Cenpa      | 0.720768 |
| A_68_P06061321 | Kdelr1     | 0.720771 |
| A_68_P02896233 | Usp13      | 0.720775 |
| A_68_P12636185 | Lsg1       | 0.721036 |
| A_68_P01214281 | Nmt2       | 0.721116 |
| A_68_P05495854 | Casd1      | 0.721235 |
| A_68_P03930447 | Cldn19     | 0.721534 |
| A_68_P12979570 | Olig2      | 0.721592 |
| A_68_P07291347 | Calb2      | 0.721864 |
| A_68_P02561233 | Nexn       | 0.722171 |
| A_68_P00904213 | Asnsd1     | 0.722255 |
| A_68_P08629281 | Adarb1     | 0.722256 |
| A_68_P06848465 | Dnajb1     | 0.722396 |
| A_68_P12445601 | Fkbp11     | 0.722488 |
| A_68_P11375105 | Ap1g2      | 0.722501 |
| A_68_P10147981 | Dnmt3a     | 0.723924 |
| A_68_P06614033 | B3gnt8     | 0.724026 |
| A_68_P13271863 | Gtf2h4     | 0.724153 |
| A_68_P06249760 | Kcnc3      | 0.724744 |
| A_68_P13019315 | Nit2       | 0.724859 |
| A_68_P03184759 | Gucy1a3    | 0.724905 |
| A_68_P08026226 | Sema3b     | 0.725159 |
| A_68_P14142812 | Nolc1      | 0.725165 |
| A_68_P02314772 | Mtx1-Thbs3 | 0.725543 |
| A_68_P03806051 | Usp1       | 0.725649 |
| A_68_P14524801 | Esx1       | 0.725683 |
| A_68_P01640329 | Btbd3      | 0.725986 |
| A_68_P07920795 | Apoa4      | 0.726049 |
| A_68_P10905580 | Nrn1       | 0.726352 |
| A_68_P03082194 | Prkab2     | 0.72646  |
| A_68_P02205490 | Epb4.111   | 0.726589 |
| A_68_P13205532 | Glo1       | 0.727196 |

|                |                          |          |
|----------------|--------------------------|----------|
| A_68_P11851446 | 4930570C03Rik            | 0.727507 |
| A_68_P03594238 | Epha7                    | 0.727787 |
| A_68_P12627348 | Cldn1                    | 0.727885 |
| A_68_P03353902 | 1110049F12Rik            | 0.728117 |
| A_68_P10636349 | Mrs2l                    | 0.728348 |
| A_68_P03534901 | Mycl1                    | 0.728365 |
| A_68_P04808473 | Ephb4                    | 0.72853  |
| A_68_P08903576 | ORF61-Cnn2               | 0.728539 |
| A_68_P07983768 | Eomes                    | 0.728753 |
| A_68_P14462408 | Rtn3                     | 0.728887 |
| A_68_P04056540 | Mmp23                    | 0.728891 |
| A_68_P14109314 | Osbp11a                  | 0.729085 |
| A_68_P08005228 | Acy1                     | 0.729125 |
| A_68_P04629065 | Gfi1                     | 0.729461 |
| A_68_P10477201 | Sfxn1                    | 0.729557 |
| A_68_P07569559 | Sacm11                   | 0.72975  |
| A_68_P07037178 | Nanos3                   | 0.729966 |
| A_68_P03303258 | Errf1                    | 0.730438 |
| A_68_P08169692 | Mtmr2                    | 0.73051  |
| A_68_P06121239 | Dll3                     | 0.730619 |
| A_68_P02545158 | Ctnbp2nl                 | 0.730689 |
| A_68_P01811585 | Tsc1                     | 0.73073  |
| A_68_P07746050 | Vprbp                    | 0.731166 |
| A_68_P15075276 | Zfp92                    | 0.73123  |
| A_68_P09374089 | Pdlim4                   | 0.731263 |
| A_68_P07777017 | Foxb1                    | 0.731377 |
| A_68_P09032003 | Pold2                    | 0.731473 |
| A_68_P06660297 | Zfp536                   | 0.731479 |
| A_68_P07406055 | Got111                   | 0.731995 |
| A_68_P06220704 | Abcc6-Nomo1              | 0.732064 |
| A_68_P04051233 | 2310026E23Rik            | 0.732118 |
| A_68_P03634721 | Ccdc21                   | 0.732281 |
| A_68_P09042040 | ENSMUST00000021240.4:169 | 0.732355 |
| A_68_P11605070 | Klhl1                    | 0.732676 |
| A_68_P11726132 | Fgf9                     | 0.732736 |

|                |               |          |
|----------------|---------------|----------|
| A_68_P03514184 | Srm           | 0.733083 |
| A_68_P14732983 | Phka1         | 0.733142 |
| A_68_P12674824 | Dvl3          | 0.733291 |
| A_68_P04459423 | Tmem130       | 0.733407 |
| A_68_P09689162 | Hoxb2         | 0.733434 |
| A_68_P05958269 | Scube2        | 0.73353  |
| A_68_P05393698 | Mest          | 0.734038 |
| A_68_P07189858 | Il12rb1       | 0.734241 |
| A_68_P03532964 | B230396O12Rik | 0.734283 |
| A_68_P10747279 | 1110007C09Rik | 0.73432  |
| A_68_P04844132 | Cxcl4         | 0.73445  |
| A_68_P03807576 | Wdte1         | 0.734535 |
| A_68_P09061472 | Ltc4s         | 0.73459  |
| A_68_P09413265 | Adam11        | 0.734715 |
| A_68_P12842136 | Cdgap         | 0.734782 |
| A_68_P13293615 | Gbl           | 0.73485  |
| A_68_P12721918 | 1500031L02Rik | 0.734869 |
| A_68_P02947763 | Spg20         | 0.734883 |
| A_68_P01424449 | Tbr1          | 0.73499  |
| A_68_P10627340 | Cdkal1        | 0.735134 |
| A_68_P14987574 | Sms           | 0.735601 |
| A_68_P07497064 | Rdx           | 0.735837 |
| A_68_P14554864 | Mid1ip1       | 0.735903 |
| A_68_P11937901 | BC030396      | 0.736086 |
| A_68_P01200951 | Epc2          | 0.736114 |
| A_68_P09225377 | Sfrs1         | 0.736243 |
| A_68_P15216256 | Efnb1         | 0.736452 |
| A_68_P04412246 | Dgkq          | 0.736456 |
| A_68_P10815405 | Sfxn1         | 0.736636 |
| A_68_P14045062 | Sh3tc2        | 0.73703  |
| A_68_P02755421 | Polr3gl       | 0.737348 |
| A_68_P06188076 | Ccdc123       | 0.737588 |
| A_68_P06069472 | Wnt11         | 0.737674 |
| A_68_P14231112 | Rps6kb2       | 0.738043 |
| A_68_P04277062 | Cxcl1         | 0.738067 |

|                |               |          |
|----------------|---------------|----------|
| A_68_P06506007 | Gysl          | 0.738125 |
| A_68_P13533864 | Ddx11         | 0.738137 |
| A_68_P06554264 | Ndnl2         | 0.738409 |
| A_68_P06098132 | Zfp553        | 0.738799 |
| A_68_P06316193 | Ebf3          | 0.738807 |
| A_68_P11404050 | Lcp1          | 0.738821 |
| A_68_P11205877 | Zfp503        | 0.739096 |
| A_68_P07444192 | Indo11        | 0.739462 |
| A_68_P05548217 | Chd4          | 0.739612 |
| A_68_P06626588 | 6430526N21Rik | 0.739613 |
| A_68_P04167205 | Adrbk2        | 0.74002  |
| A_68_P02504418 | Tpd52         | 0.740155 |
| A_68_P09077708 | Trim7         | 0.74027  |
| A_68_P04329254 | Cdk2ap1       | 0.74029  |
| A_68_P02638045 | Lysmd1        | 0.740636 |
| A_68_P06125211 | Athl1         | 0.741247 |
| A_68_P07831909 | Tle3          | 0.741251 |
| A_68_P00694567 | Crry          | 0.741286 |
| A_68_P04306467 | Whsc2         | 0.741304 |
| A_68_P08799615 | Cdc216        | 0.741383 |
| A_68_P01311715 | Hspa5         | 0.741452 |
| A_68_P05331102 | Gng11         | 0.741524 |
| A_68_P00716971 | Tnfrsf11a     | 0.741673 |
| A_68_P13679277 | Pcdhga4       | 0.741934 |
| A_68_P14240187 | Sart1         | 0.742043 |
| A_68_P12788633 | Tmem41a       | 0.742073 |
| A_68_P13337800 | Slc37a1       | 0.742239 |
| A_68_P01956107 | Spred1        | 0.742308 |
| A_68_P01220442 | Angptl2       | 0.742356 |
| A_68_P01783249 | Ak1           | 0.742411 |
| A_68_P13685522 | Pcyox11       | 0.742463 |
| A_68_P01364522 | Fbn1          | 0.742516 |
| A_68_P03338382 | Dmrta2        | 0.742552 |
| A_68_P03599365 | Lzic          | 0.742687 |
| A_68_P12269379 | Slc1a3        | 0.742726 |



|                |                |          |
|----------------|----------------|----------|
| A_68_P00439340 | Vangl2         | 0.742912 |
| A_68_P03730164 | Tmem54         | 0.743161 |
| A_68_P14097628 | 2010001M09Rik  | 0.743194 |
| A_68_P14015399 | Grp            | 0.743211 |
| A_68_P10573753 | BC021881:-1155 | 0.743413 |
| A_68_P14960254 | Gpc4           | 0.743477 |
| A_68_P15206339 | Sox3           | 0.743529 |
| A_68_P04861691 | 2610024G14Rik  | 0.743561 |
| A_68_P10884024 | Rsl1           | 0.743648 |
| A_68_P09417907 | Hoxb2          | 0.743755 |
| A_68_P12390812 | pPtp4a3        | 0.744002 |
| A_68_P06413052 | Axl            | 0.74411  |
| A_68_P08513988 | Cdk4           | 0.744122 |
| A_68_P10070767 | Rock2          | 0.744417 |
| A_68_P02145945 | Clp1           | 0.744424 |
| A_68_P10390439 | C130076O07Rik  | 0.744766 |
| A_68_P08969524 | Pdxk           | 0.744987 |
| A_68_P14245824 | Rcl1           | 0.745044 |
| A_68_P14844556 | Rs1            | 0.745045 |
| A_68_P12081602 | Rbm9           | 0.745046 |
| A_68_P14554584 | Pdk3           | 0.745052 |
| A_68_P05193381 | Phf14          | 0.745277 |
| A_68_P14612493 | Pnck           | 0.745332 |
| A_68_P09350828 | Smcr8          | 0.745427 |
| A_68_P04044353 | Med18          | 0.745706 |
| A_68_P07582959 | Endod1         | 0.745813 |
| A_68_P09143801 | Pps            | 0.745821 |
| A_68_P14313887 | Shoc2          | 0.745899 |
| A_68_P02979898 | Arhgef2        | 0.746071 |
| A_68_P12138338 | Hoxc13         | 0.74619  |
| A_68_P02116516 | Zcchc3         | 0.746193 |
| A_68_P08985425 | Crhr1          | 0.746215 |
| A_68_P04836173 | Ift81          | 0.746275 |
| A_68_P13359198 | Lrpprc         | 0.746291 |
| A_68_P05182308 | Gpr85          | 0.746631 |

|                |               |          |
|----------------|---------------|----------|
| A_68_P06643189 | Rps19         | 0.746757 |
| A_68_P03747411 | Tesk1         | 0.74684  |
| A_68_P03747745 | Ptprf         | 0.74713  |
| A_68_P09563208 | 5730593N15Rik | 0.747144 |
| A_68_P04688861 | Actr3b        | 0.747413 |
| A_68_P12500585 | Hira          | 0.748553 |
| A_68_P12069845 | 5730557B15Rik | 0.748675 |
| A_68_P06924340 | Foxf1a        | 0.748685 |
| A_68_P02381326 | Slc25a24      | 0.748822 |
| A_68_P01697623 | Pbx3          | 0.748902 |
| A_68_P03898253 | D630039A03Rik | 0.749022 |
| A_68_P02046834 | Egfl7         | 0.749039 |
| A_68_P10645306 | Nfil3         | 0.74924  |
| A_68_P09258755 | A630050E13Rik | 0.749273 |
| A_68_P02711184 | Rap1a         | 0.749381 |
| A_68_P09240372 | Tbkbp1        | 0.749805 |
| A_68_P09292536 | Gria1         | 0.749929 |
| A_68_P09595945 | Cdc6          | 0.749965 |

**Supplementary Table 3b: KOA vs KO 172 hypermethylation genes on d16**

| Probe Name     | Gene Name     | Methylation difference value |
|----------------|---------------|------------------------------|
| A_68_P07263831 | Shcgp1        | 2.132419                     |
| A_68_P14368537 | Ankrd1        | 1.771911                     |
| A_68_P13823227 | Pcdhga11      | 1.703845                     |
| A_68_P15081221 | Wdr13         | 1.700032                     |
| A_68_P03224123 | Spata21       | 1.632593                     |
| A_68_P09009571 | Olfir223      | 1.631738                     |
| A_68_P03224123 | Spata21       | 1.606029                     |
| A_68_P05448315 | Kcna5         | 1.596381                     |
| A_68_P01519278 | 1700037H04Rik | 1.593843                     |
| A_68_P08377436 | Ascl1         | 1.564098                     |
| A_68_P06550934 | Lrrc4b        | 1.554605                     |
| A_68_P07829944 | Paqr9         | 1.534036                     |
| A_68_P03075997 | Dcamk12       | 1.529319                     |
| A_68_P06683149 | Gtl3          | 1.512552                     |
| A_68_P07341251 | Spata4        | 1.509469                     |
| A_68_P03251705 | Ccnc          | 1.505269                     |
| A_68_P10499714 | Irf4          | 1.501672                     |
| A_68_P09361410 | Alox15        | 1.500519                     |
| A_68_P04331228 | Dtx1          | 1.500433                     |
| A_68_P09891693 | Cdk11         | 1.498414                     |
| A_68_P10356757 | Trim9         | 1.49836                      |
| A_68_P04844116 | Cxcl4         | 1.489747                     |
| A_68_P03912425 | Aqp7          | 1.488285                     |
| A_68_P12255657 | Baiap212      | 1.477926                     |
| A_68_P00072270 | Ptpn14        | 1.477407                     |
| A_68_P12074308 | Galr3         | 1.466488                     |
| A_68_P04300636 | Pxn           | 1.447611                     |
| A_68_P07024704 | 1700029J07Rik | 1.443679                     |
| A_68_P05958477 | Tmem16e       | 1.441569                     |
| A_68_P09440376 | Spag5         | 1.439846                     |
| A_68_P14099757 | B230399E16Rik | 1.439474                     |
| A_68_P09922529 | Ptprn2        | 1.439467                     |
| A_68_P03406403 | Ubx3          | 1.436197                     |

|                |               |          |
|----------------|---------------|----------|
| A_68_P05934226 | Kcnc3         | 1.434424 |
| A_68_P07620405 | Gtf2a2        | 1.430305 |
| A_68_P02203172 | Elf5          | 1.42878  |
| A_68_P12151832 | Wnt10b        | 1.42828  |
| A_68_P03991577 | Nfx1          | 1.426525 |
| A_68_P05111640 | Trim24        | 1.423991 |
| A_68_P13355809 | Grm4          | 1.423196 |
| A_68_P10492735 | Pitrm1        | 1.423047 |
| A_68_P07945909 | Slc25a20      | 1.421333 |
| A_68_P03759607 | 1810019J16Rik | 1.4211   |
| A_68_P04806722 | Rint1         | 1.420651 |
| A_68_P06099228 | 2310044H10Rik | 1.420063 |
| A_68_P08980029 | Krt27         | 1.419464 |
| A_68_P04390199 | Ung           | 1.419038 |
| A_68_P13436841 | Brd2          | 1.417372 |
| A_68_P08481839 | Pesk4         | 1.415729 |
| A_68_P10401129 | Sgpp1         | 1.415716 |
| A_68_P10190658 | Msgn1         | 1.413983 |
| A_68_P05321956 | Kcnd2         | 1.412861 |
| A_68_P05958473 | Tmem16e       | 1.412171 |
| A_68_P01134681 | Col19a1       | 1.410497 |
| A_68_P00400075 | Kif1a         | 1.409992 |
| A_68_P01499103 | Ggta1         | 1.406855 |
| A_68_P14103036 | Gm672         | 1.405967 |
| A_68_P09329905 | Sp2           | 1.402671 |
| A_68_P12079965 | 2810451A06Rik | 1.402134 |
| A_68_P12382326 | A4galt        | 1.400838 |
| A_68_P03639993 | Matn1         | 1.400078 |
| A_68_P01552185 | Prosapip1     | 1.39921  |
| A_68_P12120913 | Aqp5          | 1.397422 |
| A_68_P03107074 | Ccdc39        | 1.397366 |
| A_68_P12441858 | Adamts20      | 1.397252 |
| A_68_P13927242 | Pcdhac2       | 1.397074 |
| A_68_P13090368 | BC008155      | 1.396857 |
| A_68_P11679711 | Dnajc3        | 1.393891 |

|                |                     |          |
|----------------|---------------------|----------|
| A_68_P13488443 | Prss34              | 1.392889 |
| A_68_P13340765 | 2410015M20Rik-Rpl36 | 1.392881 |
| A_68_P10006453 | Foxg1               | 1.391241 |
| A_68_P14271693 | Dmrt1               | 1.389175 |
| A_68_P04671528 | Slc10a4             | 1.389035 |
| A_68_P12003446 | Oxct1               | 1.387786 |
| A_68_P10147998 | Ppp2r5c             | 1.387527 |
| A_68_P10168388 | Otub2               | 1.387269 |
| A_68_P09143803 | Pps                 | 1.387207 |
| A_68_P06046412 | H47                 | 1.387182 |
| A_68_P01442677 | Adam33              | 1.384526 |
| A_68_P04607980 | Rpl6                | 1.383943 |
| A_68_P00711135 | Slc45a3             | 1.383073 |
| A_68_P00366170 | 1110034B05Rik       | 1.383055 |
| A_68_P05944068 | Art1                | 1.382583 |
| A_68_P05123645 | Edem1               | 1.380316 |
| A_68_P08688126 | Pip5k2c             | 1.379071 |
| A_68_P13551185 | H2-M10.2            | 1.378498 |
| A_68_P09229843 | Sec14l1             | 1.375964 |
| A_68_P00179487 | Dusp27              | 1.375781 |
| A_68_P00331311 | EG240916            | 1.37409  |
| A_68_P05889184 | Xrcc1               | 1.373265 |
| A_68_P12433410 | Letmd1              | 1.372015 |
| A_68_P04964830 | Ache                | 1.371675 |
| A_68_P03809570 | Ubap2               | 1.370658 |
| A_68_P09443620 | Tef7                | 1.36996  |
| A_68_P06900371 | Ogfod1              | 1.369856 |
| A_68_P11758642 | Zic2                | 1.369756 |
| A_68_P01944492 | 4930526D03Rik       | 1.368976 |
| A_68_P05085703 | Itp1                | 1.367395 |
| A_68_P06526842 | Dpysl4              | 1.36715  |
| A_68_P03472730 | Pou3f1              | 1.367121 |
| A_68_P06996032 | Bcar1               | 1.365262 |
| A_68_P01381082 | Myt1                | 1.364911 |
| A_68_P13937104 | Myo5b               | 1.364284 |

|                |               |          |
|----------------|---------------|----------|
| A_68_P03702179 | Asph          | 1.363066 |
| A_68_P01591335 | Rtel1         | 1.362107 |
| A_68_P14385196 | Cabp4         | 1.361633 |
| A_68_P14362302 | Rps6ka4       | 1.361527 |
| A_68_P00708957 | Pax3          | 1.361    |
| A_68_P00174516 | Chrnd         | 1.359577 |
| A_68_P09115945 | BC022224      | 1.358838 |
| A_68_P10626468 | BC003212:608  | 1.358025 |
| A_68_P09977013 | Psm6          | 1.357984 |
| A_68_P11288375 | Grid1         | 1.357733 |
| A_68_P09585043 | Lig3          | 1.357034 |
| A_68_P07257166 | Ssbp4-Lrrc25  | 1.356851 |
| A_68_P06523723 | Htra1         | 1.356832 |
| A_68_P04456805 | Aym1          | 1.356668 |
| A_68_P02301827 | Tpd52         | 1.355564 |
| A_68_P00216168 | 1500015O10Rik | 1.354775 |
| A_68_P00445737 | En1           | 1.354372 |
| A_68_P10845417 | Pak1ip1       | 1.353697 |
| A_68_P14408920 | Sart1         | 1.352719 |
| A_68_P04538401 | Rxfp2         | 1.352173 |
| A_68_P01695051 | Jag1          | 1.351864 |
| A_68_P13387156 | Ntn2l         | 1.35018  |
| A_68_P08013981 | Foxb1         | 1.349942 |
| A_68_P07296135 | BC003267      | 1.349777 |
| A_68_P05950428 | Smpd1         | 1.349644 |
| A_68_P13770976 | Cdh2          | 1.349552 |
| A_68_P00406171 | Sccpdh        | 1.348715 |
| A_68_P02110645 | Ccbl1         | 1.348042 |
| A_68_P09101722 | Coasy         | 1.347497 |
| A_68_P03526224 | Cda           | 1.345901 |
| A_68_P07773646 | Sorl1         | 1.345321 |
| A_68_P10057181 | Prkcm         | 1.345045 |
| A_68_P09403409 | Gal3st1       | 1.344925 |
| A_68_P14280238 | Pik3ap1       | 1.343834 |
| A_68_P10336558 | Clec14a       | 1.343737 |

|                |                |          |
|----------------|----------------|----------|
| A_68_P10220901 | Cdk11          | 1.343247 |
| A_68_P06519231 | 4933417E01Rik  | 1.343013 |
| A_68_P09588060 | Osm            | 1.343004 |
| A_68_P04163384 | Steap1         | 1.341706 |
| A_68_P12283480 | Zfpm2          | 1.341623 |
| A_68_P14479477 | Adrb1          | 1.340918 |
| A_68_P06063501 | Ap2s1          | 1.340393 |
| A_68_P05960647 | 4930451I11Rik  | 1.339685 |
| A_68_P02298774 | Amigo1         | 1.33957  |
| A_68_P03720734 | Mmel1          | 1.339139 |
| A_68_P05284645 | Rbm28          | 1.338891 |
| A_68_P03759607 | 1810019J16Rik  | 1.338293 |
| A_68_P06897654 | Slc35e1        | 1.338042 |
| A_68_P08526444 | Ddit3          | 1.337769 |
| A_68_P08976649 | Cnp1           | 1.3371   |
| A_68_P09609496 | Rab5c          | 1.337036 |
| A_68_P04262918 | Zfp316         | 1.336621 |
| A_68_P00471093 | Rgs7           | 1.336466 |
| A_68_P07921855 | Tmem30a        | 1.336448 |
| A_68_P12262296 | Upk3a          | 1.33564  |
| A_68_P13155345 | A_68_P13155345 | 1.33554  |
| A_68_P10561599 | Prss16         | 1.334579 |
| A_68_P10997971 | Hist1h4i       | 1.334085 |
| A_68_P03324692 | H6pd           | 1.332751 |
| A_68_P00418602 | Adora1         | 1.332424 |
| A_68_P11564485 | Prrx11         | 1.332232 |
| A_68_P01293034 | 4833422F24Rik  | 1.331791 |
| A_68_P07688663 | Atm            | 1.331726 |
| A_68_P03978053 | Grhl3          | 1.331699 |
| A_68_P03720734 | Mmel1          | 1.331498 |
| A_68_P02251909 | Uck11          | 1.331232 |
| A_68_P00303681 | Igfbp5         | 1.331168 |
| A_68_P07842272 | Usp4           | 1.330904 |
| A_68_P08817669 | Sgk            | 1.330577 |

**Supplementary Table 4: 163 common genes between the genes hypomethylated in KOA offspring compared with KO offspring and those, that were hypermethylated in the KO offspring compared with N offspring on d16**

|               |
|---------------|
| 1110008J03Rik |
| 1110008J03Rik |
| 1110049F12Rik |
| 1500031L02Rik |
| 2700007P21Rik |
| 6230416J20Rik |
| 6230416J20Rik |
| Abcg8         |
| Abcg8         |
| Acot7         |
| Actg1         |
| Acy1          |
| Adam11        |
| Agxt2l2       |
| AI593442      |
| Aldoa         |
| Ambp          |
| Apoa4         |
| Arhgef19      |
| Arhgef19      |
| Armc5         |
| Athl1         |
| B3gnt8        |
| BC021891      |
| BC021891      |
| BC030396      |
| Bhlhb2        |
| Bnc1          |
| Btbd14a       |
| Capn8         |
| Capns1        |
| Casd1         |



|             |
|-------------|
| Ccdc122     |
| Cdgap       |
| Cldn19      |
| Clp1        |
| Clp1        |
| Csnk1g2     |
| Ctnbp2nl    |
| Cxcl1       |
| Cxcl1       |
| Cxcl4       |
| Cybase3     |
| Cyp4f13     |
| Cyp4f13     |
| Ddx11       |
| Defb25-Rem1 |
| Dgkq        |
| Dio1        |
| Dio1        |
| Dio1        |
| Dio1        |
| Dmrt2       |
| Dnmt3a      |
| Dnmt3a      |
| EG232599    |
| Egfl7       |
| Egfl7       |
| Egfl7       |
| Ehd3        |
| En1         |
| Epb4.111    |
| Errfi1      |
| Errfi1      |
| Errfi1      |
| Etf1        |
| Evi5        |

|         |
|---------|
| Evi5    |
| Fbx110  |
| Fbx110  |
| Fkbp11  |
| Flrt2   |
| Gnai2   |
| Gnptab  |
| Gpc4    |
| Grhl2   |
| Gtf2h4  |
| Hand2   |
| Hoxb13  |
| Hoxb2   |
| Hoxb5   |
| Hoxb7   |
| Hoxc13  |
| Hoxd3   |
| Hp1bp3  |
| Hp1bp3  |
| Hsd17b6 |
| Hsf4    |
| Ifi47   |
| Indol1  |
| Indol1  |
| Irak2   |
| Jarid2  |
| Kcnc3   |
| Kdelr1  |
| Lgals3  |
| Lhx1    |
| Lrig3   |
| Lrpprc  |
| Med18   |
| Mid1ip1 |
| Mxi1    |

|         |
|---------|
| Myo1c   |
| Nmt2    |
| Nmt2    |
| Nrn1    |
| Nxt2    |
| Olfr503 |
| Osbp11a |
| Palmd   |
| Palmd   |
| Pax7    |
| Pcdh10  |
| Pcdha9  |
| Phf14   |
| Phox2b  |
| Ptprf   |
| Ptprf   |
| Ptprs   |
| Rbm13   |
| Rbm9    |
| Rbms2   |
| Rdx     |
| Rps6ka5 |
| Rps6ka5 |
| Rtn3    |
| Sacm11  |
| Sema3b  |
| Sh3tc2  |
| Slc12a9 |
| Slc19a1 |
| Slc1a3  |
| Slc37a1 |
| Slc37a1 |
| Slc37a1 |
| Slc7a11 |
| Slc7a6  |

|                 |
|-----------------|
| Smarcc2         |
| Smcr8           |
| Smcr8           |
| Snag1           |
| Snape2          |
| Sox2            |
| Srebf1          |
| St8sia4         |
| Stx1a           |
| Tagln2          |
| Tbkbp1          |
| Tcfe3           |
| Tcfe3           |
| Timm8a1         |
| Tnfrsf11a       |
| Tpd52           |
| Tsfm            |
| Tsga10-EG623661 |
| Ung             |
| Ypel4           |
| Yy1             |
| Zfp326          |
| Zfp503          |
| Zfp503          |
| Zfp532          |
| Zfp536          |

**Supplementary Table 5**

- a** The number of genes with DNA methylation changes in the liver of KOA offspring compared with N offspring on d16.

|            | Number of genes |                     |                      |
|------------|-----------------|---------------------|----------------------|
|            | Total number    | DNA hypomethylation | DNA hypermethylation |
| <b>d16</b> | 28983           | 150                 | 1034                 |

- b** Pathway analysis of genes that were DNA hypermethylated in KOA offspring relative to those in N offspring on d16.

| Pathway                            | <i>P</i> -values |
|------------------------------------|------------------|
| beta-Alanine metabolism            | 3.80E-05         |
| Renal cell carcinoma               | 1.20E-03         |
| Axon guidance                      | 2.60E-03         |
| PPAR signaling pathway             | 3.10E-03         |
| Pyruvate metabolism                | 1.00E-02         |
| Cysteine and methionine metabolism | 1.60E-02         |
| Lysosome                           | 2.00E-02         |
| Galactose metabolism               | 3.30E-02         |
| Tryptophan metabolism              | 3.50E-02         |
| Fc gamma R-mediated phagocytosis   | 3.60E-02         |
| Glycolysis / Gluconeogenesis       | 3.60E-02         |

**Supplementary Table 6a: N vs KOA 1034 hypermethylation genes on d16**

| Probe Name     | Gene Name                  | Methylation difference value |
|----------------|----------------------------|------------------------------|
| A_68_P08659099 | Atp2b1                     | 5.619649                     |
| A_68_P12362697 | Gpt1                       | 5.149239                     |
| A_68_P08321362 | Apon                       | 4.589806                     |
| A_68_P05887814 | Echs1                      | 4.528749                     |
| A_68_P11542106 | Itih1                      | 4.368549                     |
| A_68_P08974352 | ENSMUST00000100735.1:-5885 | 4.026455                     |
| A_68_P05932565 | Polr2i                     | 3.996813                     |
| A_68_P07593867 | Slc38a3                    | 3.856302                     |
| A_68_P10973374 | Slc17a3                    | 3.335603                     |
| A_68_P10134551 | Lrfn5                      | 3.289013                     |
| A_68_P01293034 | 4833422F24Rik              | 3.240662                     |
| A_68_P03900413 | Klhdc7a                    | 3.172417                     |
| A_68_P08514851 | Nr2e1                      | 3.168675                     |
| A_68_P08066253 | Slc38a3                    | 3.084246                     |
| A_68_P09620647 | Dcxr                       | 2.996779                     |
| A_68_P04983814 | Abcb9                      | 2.95639                      |
| A_68_P05416729 | Cxcl12                     | 2.87807                      |
| A_68_P03307859 | Hp1bp3                     | 2.805745                     |
| A_68_P08778846 | Gjal                       | 2.723943                     |
| A_68_P03430349 | 2010305A19Rik              | 2.719414                     |
| A_68_P05519173 | Mkln1                      | 2.689089                     |
| A_68_P11972358 | Cbx7                       | 2.630877                     |
| A_68_P03733137 | Rnf186                     | 2.594756                     |
| A_68_P08992028 | Pnpo                       | 2.593888                     |
| A_68_P03900439 | Klhdc7a                    | 2.586357                     |
| A_68_P06602919 | Ucp3                       | 2.554169                     |
| A_68_P08122216 | Clpx                       | 2.5448                       |
| A_68_P03353696 | Sdc3                       | 2.542607                     |
| A_68_P10766266 | Slc12a7                    | 2.527982                     |
| A_68_P12303780 | Hoxc13                     | 2.511596                     |
| A_68_P04376201 | Micall2                    | 2.50517                      |
| A_68_P00873631 | Ube2f                      | 2.491692                     |
| A_68_P04970366 | Chst12                     | 2.454741                     |

|                |                            |          |
|----------------|----------------------------|----------|
| A_68_P12254132 | 1810015C04Rik              | 2.439941 |
| A_68_P14652218 | ENSMUST00000037596.5:-3006 | 2.377726 |
| A_68_P08176000 | Myo1e                      | 2.370593 |
| A_68_P09620642 | Dcxr                       | 2.363741 |
| A_68_P13319154 | 9530058B02Rik              | 2.355943 |
| A_68_P05943561 | Slc27a5                    | 2.321858 |
| A_68_P08364613 | Gstt3                      | 2.285871 |
| A_68_P13070859 | S3-12                      | 2.278895 |
| A_68_P04621660 | BC003324-6330548G22Rik     | 2.275243 |
| A_68_P06410148 | Zfp710                     | 2.248696 |
| A_68_P13374816 | Zbtb12                     | 2.232155 |
| A_68_P05307915 | Adipor2                    | 2.200657 |
| A_68_P12651548 | Pla1a                      | 2.188295 |
| A_68_P13360070 | A_68_P13360070             | 2.185616 |
| A_68_P11937882 | BC030396                   | 2.179033 |
| A_68_P06121225 | Dll3                       | 2.178701 |
| A_68_P03123565 | She                        | 2.171821 |
| A_68_P07210491 | F10                        | 2.154816 |
| A_68_P03375546 | Slc25a34                   | 2.14218  |
| A_68_P03496599 | Il22ra1                    | 2.105849 |
| A_68_P04010940 | Foxd2                      | 2.087417 |
| A_68_P07688624 | Gramd1b                    | 2.080436 |
| A_68_P11040896 | Peci                       | 2.078433 |
| A_68_P04081654 | Dio1                       | 2.069482 |
| A_68_P07238996 | Ell                        | 2.069469 |
| A_68_P09257037 | ENSMUST00000083595.1:-5713 | 2.068223 |
| A_68_P09628447 | Arfl4                      | 2.065944 |
| A_68_P01219086 | Pck1                       | 2.053895 |
| A_68_P03496599 | Il22ra1                    | 2.036504 |
| A_68_P04390199 | Ung                        | 2.026332 |
| A_68_P02145945 | Clp1                       | 2.024907 |
| A_68_P15077935 | Sox3                       | 2.022275 |
| A_68_P08005788 | Odf3l1                     | 2.01059  |
| A_68_P09103592 | Igf2bp1                    | 1.995923 |
| A_68_P00945758 | Cacna1e                    | 1.980567 |

|                |                            |          |
|----------------|----------------------------|----------|
| A_68_P15077927 | Prkx                       | 1.970641 |
| A_68_P00783024 | Farp2                      | 1.964128 |
| A_68_P06677187 | Agt                        | 1.956564 |
| A_68_P10666960 | Jarid2                     | 1.955235 |
| A_68_P02110645 | Ccbl1                      | 1.950816 |
| A_68_P04324543 | Nat8l                      | 1.946424 |
| A_68_P07622451 | Apoc3                      | 1.940699 |
| A_68_P04835083 | Fbxw8                      | 1.939241 |
| A_68_P13107839 | Abcg8                      | 1.938998 |
| A_68_P09669340 | Rab11fip4                  | 1.937035 |
| A_68_P00880269 | Zfand2b                    | 1.936263 |
| A_68_P02504542 | Zfp697                     | 1.931372 |
| A_68_P11180833 | Itih3                      | 1.924031 |
| A_68_P09252755 | ENSMUST00000100735.1:-6717 | 1.922781 |
| A_68_P00458829 | Rab17                      | 1.920212 |
| A_68_P06166301 | Sphk2                      | 1.91819  |
| A_68_P09295953 | Pctp                       | 1.912085 |
| A_68_P01309646 | Gzf1                       | 1.884655 |
| A_68_P07444192 | Indol1                     | 1.883396 |
| A_68_P01342780 | Ccbl1                      | 1.881844 |
| A_68_P01359867 | Nxt1                       | 1.879403 |
| A_68_P04914473 | Rac1                       | 1.870577 |
| A_68_P09455667 | Clk4                       | 1.869642 |
| A_68_P07361088 | Rhou                       | 1.869463 |
| A_68_P13172382 | Rhot2                      | 1.868646 |
| A_68_P07178590 | Sf3b3-Cog4                 | 1.865421 |
| A_68_P13107615 | Ticam1                     | 1.863384 |
| A_68_P10766271 | Slc12a7                    | 1.855035 |
| A_68_P04983819 | Abcb9                      | 1.854886 |
| A_68_P06519231 | 4933417E01Rik              | 1.851113 |
| A_68_P08183902 | Hyal1                      | 1.850573 |
| A_68_P14987574 | Sms                        | 1.84811  |
| A_68_P07697198 | Acaal1a                    | 1.84407  |
| A_68_P03896383 | Prdm16                     | 1.841264 |
| A_68_P07282392 | Ier2                       | 1.841222 |



|                |                     |          |
|----------------|---------------------|----------|
| A_68_P03987047 | Arhgef19            | 1.838936 |
| A_68_P12051107 | Naprt1              | 1.837565 |
| A_68_P00662466 | Il1r1               | 1.832005 |
| A_68_P02283357 | Schip1              | 1.831677 |
| A_68_P00041396 | Mgat4a              | 1.830827 |
| A_68_P06041220 | 0610012D14Rik       | 1.823279 |
| A_68_P03797750 | Cdc42               | 1.821291 |
| A_68_P14844618 | Hmgb3               | 1.81758  |
| A_68_P03396713 | Cpne3-2410005O16Rik | 1.798519 |
| A_68_P01628111 | Dab2ip              | 1.797675 |
| A_68_P07023164 | Sin3b               | 1.796968 |
| A_68_P01647847 | Atp5e               | 1.794192 |
| A_68_P08416674 | Pbld                | 1.791727 |
| A_68_P06368733 | Tnfrsf23            | 1.785241 |
| A_68_P09134930 | Scn4a               | 1.784074 |
| A_68_P12156053 | Tigd5               | 1.782759 |
| A_68_P08965912 | Adora2a             | 1.782103 |
| A_68_P03466723 | Txlna               | 1.775795 |
| A_68_P15086158 | Bcor                | 1.774253 |
| A_68_P02848277 | 1100001I22Rik       | 1.772046 |
| A_68_P09529779 | Smardc2-Tcam1       | 1.769939 |
| A_68_P02335077 | Dpyd                | 1.766849 |
| A_68_P04389279 | Fscn1               | 1.763812 |
| A_68_P06485913 | Mtap6               | 1.763041 |
| A_68_P14259005 | AI450540            | 1.760722 |
| A_68_P07467134 | Slc38a3             | 1.760431 |
| A_68_P09289118 | Aldh3a2             | 1.758631 |
| A_68_P03733127 | Rnf186              | 1.757996 |
| A_68_P10435877 | Matn3               | 1.755564 |
| A_68_P08533341 | Nodal               | 1.753933 |
| A_68_P08415566 | Mettl7b             | 1.752933 |
| A_68_P09669852 | Car10               | 1.752597 |
| A_68_P02127773 | 2310047O13Rik       | 1.752025 |
| A_68_P14420129 | Ldb1                | 1.751049 |
| A_68_P09304807 | Stac2               | 1.745528 |

|                |                            |          |
|----------------|----------------------------|----------|
| A_68_P12204213 | Sh3bp1                     | 1.742389 |
| A_68_P01015220 | AA408296                   | 1.735834 |
| A_68_P01406624 | Bmf                        | 1.734595 |
| A_68_P13977860 | Pcdhga5                    | 1.734358 |
| A_68_P11960753 | Pick1                      | 1.73337  |
| A_68_P08736561 | Atp2b1                     | 1.73138  |
| A_68_P04113179 | P2rx4                      | 1.73121  |
| A_68_P04709688 | D430033A06Rik              | 1.728483 |
| A_68_P14934620 | Bex4                       | 1.727452 |
| A_68_P07946875 | Mst1                       | 1.726311 |
| A_68_P00372595 | Agxt                       | 1.724205 |
| A_68_P13425194 | Acat3                      | 1.723472 |
| A_68_P13586042 | C3                         | 1.720933 |
| A_68_P10554343 | Pik3r1                     | 1.720797 |
| A_68_P14768398 | Apex2                      | 1.718605 |
| A_68_P06739164 | Wwc2                       | 1.718489 |
| A_68_P13594309 | Lipg                       | 1.718368 |
| A_68_P04881066 | Gatad1                     | 1.716646 |
| A_68_P09245911 | Ifi47                      | 1.714575 |
| A_68_P07339397 | 4921524J17Rik              | 1.714267 |
| A_68_P06137550 | Strn4                      | 1.713789 |
| A_68_P00316905 | Tcfcp2l1                   | 1.712471 |
| A_68_P12412293 | Irak4                      | 1.71057  |
| A_68_P11522706 | Clu                        | 1.706848 |
| A_68_P09582270 | 2010305C02Rik              | 1.700087 |
| A_68_P00904876 | Tsn                        | 1.696888 |
| A_68_P13186432 | Kcnk12                     | 1.696273 |
| A_68_P08600139 | Sesn1                      | 1.695192 |
| A_68_P10477201 | Sfxn1                      | 1.693759 |
| A_68_P12046833 | ENSMUST00000083630.1:-3976 | 1.693683 |
| A_68_P04113179 | P2rx4                      | 1.691899 |
| A_68_P09420564 | Lrrc46                     | 1.691015 |
| A_68_P06049341 | Egln2                      | 1.690497 |
| A_68_P13201106 | Jmjd2b                     | 1.688388 |
| A_68_P10002168 | Dpf3                       | 1.68526  |

|                |                      |          |
|----------------|----------------------|----------|
| A_68_P07364190 | Dcun1d2              | 1.684255 |
| A_68_P09186162 | Socs7                | 1.683958 |
| A_68_P10526799 | Pik3r1               | 1.681965 |
| A_68_P04546813 | Slc2a9               | 1.680349 |
| A_68_P06160078 | 1600014C10Rik        | 1.679461 |
| A_68_P03160397 | Mab211l              | 1.67338  |
| A_68_P07054328 | Thap1l               | 1.670121 |
| A_68_P06293260 | Mir16                | 1.66929  |
| A_68_P03296751 | Klhl9                | 1.668838 |
| A_68_P00904213 | Asnsd1               | 1.668315 |
| A_68_P07046503 | Nfix                 | 1.667995 |
| A_68_P11558065 | Dhrs4                | 1.667942 |
| A_68_P06168319 | Isg201l              | 1.667232 |
| A_68_P04349851 | Lrch4                | 1.666799 |
| A_68_P11980858 | Arid2                | 1.663889 |
| A_68_P06397866 | Ldha                 | 1.661735 |
| A_68_P01214326 | Nmt2                 | 1.661045 |
| A_68_P08185653 | BC033915             | 1.66055  |
| A_68_P11132687 | Ppp3cc               | 1.660509 |
| A_68_P03379272 | Mxra8                | 1.659388 |
| A_68_P09606302 | Ern1                 | 1.65789  |
| A_68_P01982873 | BC066135             | 1.655947 |
| A_68_P12045187 | AK162044             | 1.65129  |
| A_68_P09582284 | 2010305C02Rik        | 1.651021 |
| A_68_P11534471 | Lgals3               | 1.648572 |
| A_68_P14217831 | Klf9                 | 1.647805 |
| A_68_P11564443 | 9430077A04Rik-Prrxl1 | 1.647322 |
| A_68_P07078935 | Atbf1                | 1.646868 |
| A_68_P04290359 | Xrcc2                | 1.646374 |
| A_68_P04668612 | Qdpr                 | 1.645641 |
| A_68_P13155345 | A_68_P13155345       | 1.644135 |
| A_68_P04081647 | Dio1                 | 1.644129 |
| A_68_P04014066 | Mfsd2                | 1.642711 |
| A_68_P03995316 | Decr1                | 1.642297 |
| A_68_P09176959 | Il13                 | 1.638504 |

|                |                    |          |
|----------------|--------------------|----------|
| A_68_P04316025 | Arhgap24           | 1.638175 |
| A_68_P04286123 | Art3               | 1.637273 |
| A_68_P04650365 | Ptpn11             | 1.637044 |
| A_68_P03747731 | Ptprf              | 1.634508 |
| A_68_P01587241 | Egfl7              | 1.633844 |
| A_68_P13196770 | 1110002E23Rik-Frs3 | 1.632658 |
| A_68_P01251863 | Notch1             | 1.632458 |
| A_68_P10037181 | Rtn1               | 1.629815 |
| A_68_P03513611 | St3gal3            | 1.628439 |
| A_68_P06848458 | Dnajb1             | 1.627064 |
| A_68_P06048161 | Pak4               | 1.626297 |
| A_68_P12465455 | Kdelr3             | 1.625902 |
| A_68_P04316294 | Mapre3             | 1.62544  |
| A_68_P10336568 | Clec14a            | 1.625074 |
| A_68_P09153383 | Ern1               | 1.62192  |
| A_68_P14385433 | Pik3ap1            | 1.621597 |
| A_68_P09694962 | Hn1                | 1.618952 |
| A_68_P05343553 | Pde3a              | 1.618652 |
| A_68_P05872318 | Scnn1a             | 1.616043 |
| A_68_P08713345 | Apof               | 1.614903 |
| A_68_P06873958 | Ranbp10            | 1.614498 |
| A_68_P07193768 | Cdh13              | 1.61078  |
| A_68_P03805415 | Ambp               | 1.610693 |
| A_68_P07697209 | Acaa1a             | 1.610606 |
| A_68_P06061321 | Kdelr1             | 1.609645 |
| A_68_P06473014 | Slc27a5            | 1.609588 |
| A_68_P13614662 | Slc4a9             | 1.60863  |
| A_68_P10927042 | Bmp6               | 1.608036 |
| A_68_P06962856 | Lig4               | 1.607312 |
| A_68_P15175265 | Tcf3               | 1.607124 |
| A_68_P14458023 | Prkg1              | 1.605639 |
| A_68_P08195648 | Glb1               | 1.604787 |
| A_68_P08595238 | 2310011J03Rik      | 1.604341 |
| A_68_P00317108 | Cxcr4              | 1.604316 |
| A_68_P14501828 | Fads1              | 1.60073  |

|                |                    |          |
|----------------|--------------------|----------|
| A_68_P07326865 | Cyb5b              | 1.599305 |
| A_68_P06914051 | Lsm4               | 1.598252 |
| A_68_P07946873 | Mst1               | 1.598229 |
| A_68_P08204430 | Timp3              | 1.597375 |
| A_68_P09361410 | Alox15             | 1.597205 |
| A_68_P13147684 | Rftn1              | 1.596753 |
| A_68_P09820901 | Rin3               | 1.59658  |
| A_68_P04449097 | Suds3              | 1.596226 |
| A_68_P14127854 | Nol4               | 1.595347 |
| A_68_P06727821 | BC019943           | 1.594963 |
| A_68_P10147998 | Ppp2r5c            | 1.594754 |
| A_68_P06804280 | Irf2               | 1.594748 |
| A_68_P01603452 | C630035N08Rik      | 1.593115 |
| A_68_P13112327 | Gabbr1             | 1.591262 |
| A_68_P02501124 | Nexn               | 1.591232 |
| A_68_P06221701 | Bag3               | 1.590427 |
| A_68_P08625141 | Rab32              | 1.590396 |
| A_68_P07684876 | Tgm4               | 1.589459 |
| A_68_P05108100 | Slc2a3             | 1.588012 |
| A_68_P12958415 | Alg3-1810009K13Rik | 1.586551 |
| A_68_P00828037 | AW822216           | 1.586416 |
| A_68_P01293546 | A530013C23Rik      | 1.586085 |
| A_68_P10481288 | Gcnt2              | 1.584906 |
| A_68_P09975941 | Crip1              | 1.584701 |
| A_68_P07117078 | Cbfa2t3h           | 1.58355  |
| A_68_P09663278 | Rpl23a-Rab34       | 1.582134 |
| A_68_P00582015 | Mdm4               | 1.581982 |
| A_68_P08454871 | Nodal              | 1.581463 |
| A_68_P06300520 | Bccip              | 1.580495 |
| A_68_P08191110 | Ifrd2              | 1.578902 |
| A_68_P04976323 | Cdk8               | 1.576476 |
| A_68_P12771414 | Dcbld2             | 1.576329 |
| A_68_P12843197 | Ehhadh             | 1.57599  |
| A_68_P05117228 | Anxa4              | 1.575755 |
| A_68_P11311189 | Lrtm1              | 1.571723 |

|                |                |          |
|----------------|----------------|----------|
| A_68_P02798123 | Slc7a11        | 1.571652 |
| A_68_P08450520 | Hkdc1          | 1.570532 |
| A_68_P09288533 | Slc36a2        | 1.569649 |
| A_68_P06844279 | Tom1           | 1.566898 |
| A_68_P09613181 | Coro6          | 1.566772 |
| A_68_P11551197 | Ccdc25         | 1.566719 |
| A_68_P07517444 | Apoa1          | 1.565848 |
| A_68_P07505359 | Eif3s4         | 1.563028 |
| A_68_P10685829 | Barx1          | 1.562496 |
| A_68_P05754477 | C1rl           | 1.561867 |
| A_68_P10035212 | Zfyve1         | 1.561049 |
| A_68_P14742409 | Pdzx           | 1.560744 |
| A_68_P07513274 | Pcolce2        | 1.560314 |
| A_68_P15013698 | Las1l          | 1.560176 |
| A_68_P05946610 | Tead1          | 1.560166 |
| A_68_P12355067 | BC084730:-1892 | 1.560033 |
| A_68_P03514184 | Srm            | 1.558492 |
| A_68_P06327205 | Kenc3          | 1.557531 |
| A_68_P12162353 | Ldoc1l         | 1.557113 |
| A_68_P10702707 | Slc35d2        | 1.556992 |
| A_68_P03747745 | Ptprf          | 1.553534 |
| A_68_P05307920 | Adipor2        | 1.553371 |
| A_68_P13847095 | Brunol4        | 1.552841 |
| A_68_P08129723 | Qtrt1          | 1.552486 |
| A_68_P08173092 | Cyp8b1         | 1.55231  |
| A_68_P02251909 | Uck1l          | 1.549621 |
| A_68_P01519278 | 1700037H04Rik  | 1.549541 |
| A_68_P14830743 | Gnl3l          | 1.54906  |
| A_68_P12677558 | Mrap           | 1.54899  |
| A_68_P04761491 | Sds            | 1.548369 |
| A_68_P07400685 | Vac14          | 1.546575 |
| A_68_P05345709 | Magil          | 1.546434 |
| A_68_P05500620 | Stk31          | 1.543976 |
| A_68_P09283753 | Spata20        | 1.543006 |
| A_68_P08500787 | Slc16a10       | 1.542564 |

|                |              |          |
|----------------|--------------|----------|
| A_68_P14568988 | Rnf12        | 1.541526 |
| A_68_P09028343 | D11Lgp2e     | 1.540929 |
| A_68_P08694627 | Dna21        | 1.540804 |
| A_68_P04742466 | Ywhag        | 1.540448 |
| A_68_P12074308 | Galr3        | 1.540292 |
| A_68_P08715400 | Fyn          | 1.539389 |
| A_68_P03581859 | St3gal3      | 1.538098 |
| A_68_P06035787 | Tm6sf1       | 1.538059 |
| A_68_P04316025 | Arhgap24     | 1.537882 |
| A_68_P04422939 | Ssh1-Dao1    | 1.537264 |
| A_68_P07666475 | Pfkfb4       | 1.536921 |
| A_68_P04504900 | Hsd17b13     | 1.534446 |
| A_68_P03332180 | Ttll10       | 1.533974 |
| A_68_P00625151 | Centg2       | 1.533892 |
| A_68_P04455536 | Dr1          | 1.533527 |
| A_68_P14224733 | Map4k2       | 1.53245  |
| A_68_P04504900 | Hsd17b13     | 1.532262 |
| A_68_P04000868 | Rnf207-Rpl22 | 1.531211 |
| A_68_P11685275 | Galntl2      | 1.530369 |
| A_68_P03203839 | Cort         | 1.530245 |
| A_68_P09329905 | Sp2          | 1.529679 |
| A_68_P07869529 | Cep70        | 1.529645 |
| A_68_P12451528 | Atf7         | 1.529564 |
| A_68_P12276707 | Tmem74       | 1.529366 |
| A_68_P12306344 | Krt18        | 1.529062 |
| A_68_P08474950 | Mtap7        | 1.528491 |
| A_68_P03912425 | Aqp7         | 1.528408 |
| A_68_P14706450 | Diap2        | 1.527589 |
| A_68_P10499714 | Irf4         | 1.526752 |
| A_68_P03464515 | Sdhb         | 1.526331 |
| A_68_P14393451 | Ndufb8       | 1.525609 |
| A_68_P14612493 | Pnck         | 1.525148 |
| A_68_P09817295 | Dlst         | 1.525118 |
| A_68_P04936402 | Slc30a9      | 1.523606 |
| A_68_P04901404 | Tmem142a     | 1.523285 |

|                |               |          |
|----------------|---------------|----------|
| A_68_P05433825 | Gm839         | 1.522913 |
| A_68_P13879820 | Slc23a1       | 1.522039 |
| A_68_P01137518 | Niban         | 1.52036  |
| A_68_P05678119 | Inmt          | 1.519093 |
| A_68_P08321588 | BC025920      | 1.518189 |
| A_68_P15039755 | Zmym3         | 1.517238 |
| A_68_P00493944 | Hs6st1        | 1.514766 |
| A_68_P03881913 | D530005L17Rik | 1.513696 |
| A_68_P03463892 | Srrm1         | 1.51265  |
| A_68_P09982964 | 2410016O06Rik | 1.51263  |
| A_68_P00186067 | A830006F12Rik | 1.511897 |
| A_68_P01293529 | A530013C23Rik | 1.511345 |
| A_68_P09089981 | Tax1bp3       | 1.511277 |
| A_68_P03203839 | Cort          | 1.508423 |
| A_68_P06655108 | Lrdd          | 1.506802 |
| A_68_P11169779 | Ndst2         | 1.506502 |
| A_68_P14897879 | Gprasp1       | 1.505858 |
| A_68_P11918182 | Galr3         | 1.50571  |
| A_68_P11736607 | Slc25a37      | 1.505709 |
| A_68_P06683149 | Gtl3          | 1.505077 |
| A_68_P03232913 | Pgm2          | 1.504647 |
| A_68_P03720734 | Mmel1         | 1.504332 |
| A_68_P01176002 | Clp1          | 1.503881 |
| A_68_P07306669 | Car5a-Banp    | 1.503682 |
| A_68_P06422253 | Zfp668-Zfp646 | 1.503321 |
| A_68_P10259565 | Rgs6          | 1.503003 |
| A_68_P03332180 | Ttll10        | 1.502303 |
| A_68_P05885085 | Gfpt1         | 1.50197  |
| A_68_P03832001 | Pax5          | 1.501002 |
| A_68_P04551716 | Crybb3        | 1.500762 |
| A_68_P00372598 | Agxt          | 1.499331 |
| A_68_P04909167 | D5Wsu178e     | 1.49895  |
| A_68_P11564485 | Prrxl1        | 1.498428 |
| A_68_P02657234 | Car3          | 1.49833  |
| A_68_P04909167 | D5Wsu178e     | 1.497502 |



|                |               |          |
|----------------|---------------|----------|
| A_68_P03899556 | Thap3         | 1.497086 |
| A_68_P04271280 | Mdh2          | 1.49693  |
| A_68_P08357112 | Trhde         | 1.496788 |
| A_68_P04267219 | Emid2         | 1.495906 |
| A_68_P11653564 | Rhobtb2       | 1.495857 |
| A_68_P08817448 | D10Jhu81e     | 1.495613 |
| A_68_P04948730 | Cops4         | 1.495533 |
| A_68_P11079538 | Sirt5         | 1.494837 |
| A_68_P10046450 | Serpina5      | 1.494418 |
| A_68_P08555474 | Atoh7         | 1.492932 |
| A_68_P10113821 | Jundm2        | 1.492866 |
| A_68_P09025065 | Ugp2          | 1.490674 |
| A_68_P09937357 | Flrt2         | 1.490661 |
| A_68_P02938129 | Ctbs          | 1.490448 |
| A_68_P09845387 | Ppp1r13b      | 1.48983  |
| A_68_P08824256 | Traf3ip2      | 1.489383 |
| A_68_P14330355 | Rnaseh2c      | 1.48891  |
| A_68_P09565021 | D11Ert636e    | 1.488711 |
| A_68_P01561177 | Dennd1a       | 1.488701 |
| A_68_P03634721 | Ccdc21        | 1.487729 |
| A_68_P03727929 | Trp73-Wdr8    | 1.487154 |
| A_68_P09379981 | Smarcd2-Tcam1 | 1.487094 |
| A_68_P08834117 | Ddit4         | 1.487061 |
| A_68_P07214031 | Tnrc9         | 1.486875 |
| A_68_P03518600 | Pesk9         | 1.486867 |
| A_68_P14704391 | Cited1        | 1.486007 |
| A_68_P06364198 | Zfp30         | 1.485856 |
| A_68_P14702909 | Tro           | 1.485688 |
| A_68_P14047108 | Psd2          | 1.485627 |
| A_68_P08888274 | Cd63          | 1.48559  |
| A_68_P07947580 | Tdglf1-Lrrc2  | 1.485325 |
| A_68_P08783495 | Cirbp         | 1.484897 |
| A_68_P08980029 | Krt27         | 1.484247 |
| A_68_P01628078 | Dab2ip        | 1.484042 |
| A_68_P07256667 | D030016E14Rik | 1.483922 |

|                |               |          |
|----------------|---------------|----------|
| A_68_P03899301 | Zbtb8         | 1.483826 |
| A_68_P12138338 | Hoxc13        | 1.483194 |
| A_68_P10499724 | Irf4          | 1.48285  |
| A_68_P11456818 | Slc25a37      | 1.482026 |
| A_68_P05640423 | Ldhb          | 1.481345 |
| A_68_P08526773 | Ltv1          | 1.480891 |
| A_68_P14278546 | Cldf1         | 1.480356 |
| A_68_P05988526 | Dkk11-Tead2   | 1.479889 |
| A_68_P03852202 | Tbc1d2        | 1.479596 |
| A_68_P09063281 | Itgb4         | 1.479567 |
| A_68_P11132853 | 5730469M10Rik | 1.478402 |
| A_68_P04365068 | Klb           | 1.477975 |
| A_68_P04026755 | Adprhl2       | 1.477906 |
| A_68_P09409119 | Gpre5c        | 1.477774 |
| A_68_P09214836 | Mpdu1         | 1.47771  |
| A_68_P03654137 | St3gal3       | 1.476231 |
| A_68_P04590703 | Stx1a         | 1.475218 |
| A_68_P06656873 | Gdpd5         | 1.474837 |
| A_68_P12268481 | Aqp2          | 1.47469  |
| A_68_P03176909 | 6530418L21Rik | 1.474504 |
| A_68_P10960939 | Cd83          | 1.47429  |
| A_68_P01906267 | Sohlh1        | 1.473745 |
| A_68_P12074358 | Pycrl         | 1.472776 |
| A_68_P10667411 | Mylip         | 1.471582 |
| A_68_P10406991 | 4831426I19Rik | 1.471236 |
| A_68_P09467086 | Ints2         | 1.470856 |
| A_68_P00327181 | Lemd1         | 1.470616 |
| A_68_P14368537 | Ankrd1        | 1.470332 |
| A_68_P03896713 | Cdkn2c        | 1.470126 |
| A_68_P03935411 | Aqp3          | 1.469318 |
| A_68_P09166156 | Tmc6-Tmc8     | 1.468933 |
| A_68_P06085388 | Ccne1         | 1.468697 |
| A_68_P01943462 | Ctsz          | 1.468533 |
| A_68_P00072271 | Ptpn14        | 1.468269 |
| A_68_P13359207 | Lrrprc        | 1.468152 |

|                |               |          |
|----------------|---------------|----------|
| A_68_P09193111 | Eif1          | 1.467945 |
| A_68_P01804429 | Pxmp4-Zfp341  | 1.467591 |
| A_68_P05979604 | Lsr           | 1.467481 |
| A_68_P13176455 | Galnt14       | 1.467415 |
| A_68_P07124748 | Lypla3        | 1.466889 |
| A_68_P04071366 | Plaa          | 1.466764 |
| A_68_P09153352 | Rnf185        | 1.465903 |
| A_68_P03505622 | E2f2          | 1.464979 |
| A_68_P12877631 | Ahsg          | 1.464225 |
| A_68_P11111057 | Tcfap2a       | 1.463548 |
| A_68_P08377706 | Tle6          | 1.462789 |
| A_68_P05872300 | Scnn1a        | 1.461799 |
| A_68_P10766257 | Slc12a7       | 1.461562 |
| A_68_P01092733 | Lbr           | 1.460251 |
| A_68_P11867189 | Pfdn5         | 1.460001 |
| A_68_P10437458 | Slc35b3       | 1.459885 |
| A_68_P11911303 | Fkbp11        | 1.459781 |
| A_68_P11209114 | Camk2g        | 1.459623 |
| A_68_P07738687 | Ncam1         | 1.459108 |
| A_68_P00273226 | EG240916      | 1.458418 |
| A_68_P02986715 | Tmem144       | 1.457984 |
| A_68_P11288375 | Grid1         | 1.457847 |
| A_68_P13319163 | 9530058B02Rik | 1.457545 |
| A_68_P14814452 | Gripap1       | 1.457428 |
| A_68_P14280238 | Pik3ap1       | 1.457419 |
| A_68_P05285116 | Cpa2          | 1.457155 |
| A_68_P05959998 | Lmtk3         | 1.456797 |
| A_68_P04026755 | Adprhl2       | 1.45652  |
| A_68_P12056452 | Slc39a4       | 1.456413 |
| A_68_P09656833 | Agxt2l2       | 1.455604 |
| A_68_P03795291 | Pink1         | 1.455548 |
| A_68_P13411229 | Atp6v1e2      | 1.455289 |
| A_68_P08446465 | Ncln          | 1.455214 |
| A_68_P08339442 | Sar1a         | 1.454726 |
| A_68_P07561489 | 2310005P05Rik | 1.454545 |

|                |                       |          |
|----------------|-----------------------|----------|
| A_68_P00418602 | Adora1                | 1.454265 |
| A_68_P13921216 | Kif20a                | 1.453341 |
| A_68_P05904990 | C330005M16Rik         | 1.452912 |
| A_68_P07950325 | Sh3px3                | 1.452875 |
| A_68_P10669255 | Agtppb1               | 1.452506 |
| A_68_P13620460 | LOC639653             | 1.451731 |
| A_68_P00082872 | Prei3                 | 1.451494 |
| A_68_P15004426 | Armcx3                | 1.451056 |
| A_68_P13161337 | Rpl10a                | 1.450924 |
| A_68_P10093139 | Gm1568                | 1.450446 |
| A_68_P08085317 | Map2k5                | 1.450197 |
| A_68_P09154524 | Cog1                  | 1.45015  |
| A_68_P08110716 | Acp5                  | 1.449856 |
| A_68_P09317362 | 2310067B10Rik         | 1.449475 |
| A_68_P12092114 | Krt79                 | 1.44944  |
| A_68_P14794097 | Zic3                  | 1.449335 |
| A_68_P02590895 | BC028528              | 1.44907  |
| A_68_P04825881 | Fbxl10                | 1.448834 |
| A_68_P08350042 | Hmha1                 | 1.448409 |
| A_68_P11215454 | Olfm4                 | 1.448167 |
| A_68_P10959245 | Tcfap2a               | 1.448068 |
| A_68_P04393156 | Trafid1-C330023M02Rik | 1.447876 |
| A_68_P05715101 | Xpc                   | 1.447498 |
| A_68_P12677554 | Mrap                  | 1.44726  |
| A_68_P06682522 | Herpud1               | 1.447101 |
| A_68_P00346078 | Selp                  | 1.446255 |
| A_68_P01704832 | Rtn4rl2               | 1.446219 |
| A_68_P07946225 | Dnmt1                 | 1.446069 |
| A_68_P12636173 | Lsg1                  | 1.446016 |
| A_68_P01853107 | Zbtb43                | 1.445889 |
| A_68_P13059000 | Hmga1                 | 1.445519 |
| A_68_P09349429 | Pscd1                 | 1.445206 |
| A_68_P05495655 | Znhit4                | 1.445202 |
| A_68_P06784221 | Ppp2cb                | 1.44518  |
| A_68_P00976261 | Capn2                 | 1.443754 |

|                |               |          |
|----------------|---------------|----------|
| A_68_P05919592 | Dctn5         | 1.442914 |
| A_68_P04316598 | Tesc          | 1.442183 |
| A_68_P14148146 | Zdhhc6        | 1.44207  |
| A_68_P13322670 | Prr3          | 1.44174  |
| A_68_P01334676 | 9230107O10Rik | 1.441045 |
| A_68_P14104697 | Cul2          | 1.440976 |
| A_68_P04803447 | Afp           | 1.44087  |
| A_68_P12669014 | Pcqap         | 1.440071 |
| A_68_P01997700 | Lsm14b        | 1.438893 |
| A_68_P08779365 | Zbtb24        | 1.438717 |
| A_68_P03087427 | Pklr          | 1.438709 |
| A_68_P09119456 | Spata20       | 1.438591 |
| A_68_P08991556 | Mrps24        | 1.438477 |
| A_68_P07559432 | D930028F11Rik | 1.43747  |
| A_68_P09115945 | BC022224      | 1.43716  |
| A_68_P05161860 | Dusp11        | 1.436969 |
| A_68_P05448315 | Kcna5         | 1.436499 |
| A_68_P13695623 | Ablim3        | 1.436244 |
| A_68_P13499441 | Slc29a1       | 1.436126 |
| A_68_P03428697 | Dffa          | 1.435921 |
| A_68_P09108875 | Aatk          | 1.435872 |
| A_68_P04030079 | 1700003M02Rik | 1.435819 |
| A_68_P04742466 | Ywhag         | 1.435035 |
| A_68_P01918764 | Sdc4          | 1.434142 |
| A_68_P02480010 | Bmpr1b        | 1.433834 |
| A_68_P08817485 | D10Jhu81e     | 1.433749 |
| A_68_P04568812 | Hdh           | 1.433407 |
| A_68_P12659824 | Sema5b        | 1.432966 |
| A_68_P11949856 | Arhgap8       | 1.432242 |
| A_68_P12256637 | Lifr          | 1.43218  |
| A_68_P11235583 | Ccdc122       | 1.431807 |
| A_68_P01075343 | Nmur1         | 1.431739 |
| A_68_P03602285 | 9930104L06Rik | 1.431719 |
| A_68_P10718192 | Id4           | 1.431203 |
| A_68_P08376605 | Lrrc3         | 1.430762 |

|                |                       |          |
|----------------|-----------------------|----------|
| A_68_P01182959 | Nfatc2                | 1.430751 |
| A_68_P04125045 | Prom1                 | 1.430601 |
| A_68_P12175545 | Galr3                 | 1.43003  |
| A_68_P04323144 | Sult1d1               | 1.429318 |
| A_68_P05251168 | 8430408G22Rik         | 1.429266 |
| A_68_P13929227 | Wnt8a                 | 1.429108 |
| A_68_P12293869 | Cyp2d26               | 1.429025 |
| A_68_P14842575 | Ube1x                 | 1.428913 |
| A_68_P04871762 | Gprk2l                | 1.428672 |
| A_68_P04698270 | Fndc4                 | 1.428474 |
| A_68_P10942741 | Tmed9                 | 1.427877 |
| A_68_P04107067 | Rpl2l                 | 1.427654 |
| A_68_P00170655 | 4931440L10Rik-Jarid1b | 1.427606 |
| A_68_P08713341 | Apof                  | 1.427588 |
| A_68_P14836142 | Trex2                 | 1.427525 |
| A_68_P03899556 | Thap3                 | 1.427412 |
| A_68_P01944480 | 4930526D03Rik         | 1.4271   |
| A_68_P09718198 | Sphk1                 | 1.427011 |
| A_68_P04909159 | D5Wsu178e             | 1.426943 |
| A_68_P09697832 | Sec14l4               | 1.426688 |
| A_68_P01182844 | Slc30a4               | 1.426611 |
| A_68_P03405759 | Txlna                 | 1.426604 |
| A_68_P09398667 | 2210020M01Rik         | 1.426216 |
| A_68_P03709371 | Plcl4                 | 1.426053 |
| A_68_P10323285 | Rps6ka5               | 1.424931 |
| A_68_P07299665 | Nfix                  | 1.424464 |
| A_68_P11477858 | Tpt1                  | 1.424277 |
| A_68_P01173674 | 2010011I20Rik         | 1.423893 |
| A_68_P08184605 | Rbp2                  | 1.422313 |
| A_68_P09410666 | Ankrd43               | 1.421737 |
| A_68_P11308601 | Tgm1                  | 1.421416 |
| A_68_P00396252 | Hhat                  | 1.421254 |
| A_68_P02944888 | Prune                 | 1.421197 |
| A_68_P05678030 | Hoxa11                | 1.421079 |
| A_68_P00864420 | Lefty1                | 1.420885 |

|                |                      |          |
|----------------|----------------------|----------|
| A_68_P00992012 | Lemdl                | 1.420739 |
| A_68_P08138672 | AI593442             | 1.42035  |
| A_68_P10628441 | F2rl1                | 1.420108 |
| A_68_P01337232 | Ptgis                | 1.419762 |
| A_68_P06857332 | Hmox1                | 1.41975  |
| A_68_P10556434 | Rnf44-BC040758       | 1.419585 |
| A_68_P02653596 | 4632404H12Rik-Ube2q1 | 1.419406 |
| A_68_P04904125 | Pdgfa                | 1.419133 |
| A_68_P06212420 | Egln2                | 1.418662 |
| A_68_P04121317 | Tmem130              | 1.416783 |
| A_68_P04899482 | Brap                 | 1.416621 |
| A_68_P15216275 | Efnb1                | 1.41555  |
| A_68_P04397082 | Cops6                | 1.415353 |
| A_68_P07513276 | Pcolce2              | 1.415076 |
| A_68_P07218229 | Slc12a4              | 1.413568 |
| A_68_P04306177 | Crcp                 | 1.413382 |
| A_68_P12240032 | Eppk1                | 1.412875 |
| A_68_P13975465 | Pcdha3               | 1.41283  |
| A_68_P06390438 | AI428936             | 1.412436 |
| A_68_P13594311 | Lipg                 | 1.412391 |
| A_68_P06583812 | Zfp84                | 1.412358 |
| A_68_P03466723 | Txlna                | 1.412004 |
| A_68_P04899482 | Brap                 | 1.411886 |
| A_68_P01127569 | Tsga10-EG623661      | 1.411843 |
| A_68_P06554264 | Ndn12                | 1.411804 |
| A_68_P10113544 | Bag5                 | 1.411329 |
| A_68_P06098719 | Zfp579               | 1.411065 |
| A_68_P08161575 | Acpp                 | 1.411036 |
| A_68_P07775112 | Phldb1               | 1.40924  |
| A_68_P10913242 | Wrnip1               | 1.409125 |
| A_68_P06926959 | Nob1                 | 1.40853  |
| A_68_P07444231 | Nanos3               | 1.408003 |
| A_68_P01668312 | E2f1                 | 1.407714 |
| A_68_P07720142 | Fxyd6                | 1.407381 |
| A_68_P10372966 | Hif1a                | 1.407126 |

|                |                                      |          |
|----------------|--------------------------------------|----------|
| A_68_P04435271 | Man2b2                               | 1.406616 |
| A_68_P09593309 | OTTMUSG00000000934-<br>1700020L24Rik | 1.406483 |
| A_68_P08068605 | Tpm1                                 | 1.406398 |
| A_68_P12979239 | Ppl                                  | 1.40558  |
| A_68_P08395271 | Smarcc2                              | 1.405527 |
| A_68_P06020155 | Slc22a18                             | 1.405125 |
| A_68_P01506207 | Ndor1-C730025P13Rik                  | 1.404116 |
| A_68_P10509311 | AU042651                             | 1.40399  |
| A_68_P12871002 | Sema5b                               | 1.403742 |
| A_68_P03494298 | 1110020C03Rik                        | 1.403589 |
| A_68_P06247672 | 5430432N15Rik                        | 1.403439 |
| A_68_P06907386 | Mrps31                               | 1.403207 |
| A_68_P09078461 | Anapc11                              | 1.403101 |
| A_68_P07134632 | Rbm35b                               | 1.402672 |
| A_68_P13797523 | Pcdhga6                              | 1.402619 |
| A_68_P09534568 | Galk1                                | 1.402563 |
| A_68_P11507565 | Pcdh17                               | 1.402404 |
| A_68_P10960928 | Cd83                                 | 1.401914 |
| A_68_P01772350 | Lcn12                                | 1.401837 |
| A_68_P12256635 | Lifr                                 | 1.401321 |
| A_68_P03533898 | Nbl1                                 | 1.401021 |
| A_68_P11031496 | Klf6                                 | 1.40099  |
| A_68_P08052081 | Sema3b                               | 1.400213 |
| A_68_P08817347 | Upb1                                 | 1.400141 |
| A_68_P14814429 | Gripap1                              | 1.399972 |
| A_68_P14022680 | Matr3                                | 1.399952 |
| A_68_P04671642 | Unc84a                               | 1.399699 |
| A_68_P13348089 | Slc29a1                              | 1.39949  |
| A_68_P04489999 | Tchp                                 | 1.399278 |
| A_68_P01081177 | Slco5a1                              | 1.399243 |
| A_68_P09469784 | Nefh                                 | 1.398879 |
| A_68_P12462766 | Top1mt                               | 1.3988   |
| A_68_P13874169 | Rps14                                | 1.398646 |
| A_68_P14386452 | Naaladl1                             | 1.398299 |



|                |                           |          |
|----------------|---------------------------|----------|
| A_68_P13175446 | Haghl                     | 1.398104 |
| A_68_P13173432 | Decr2                     | 1.397833 |
| A_68_P04893782 | Snx8                      | 1.397799 |
| A_68_P07829944 | Paqr9                     | 1.397399 |
| A_68_P11000859 | Lman2-Rgs14               | 1.397116 |
| A_68_P04761491 | Sds                       | 1.396979 |
| A_68_P10354469 | Jag2                      | 1.396256 |
| A_68_P03595059 | Slc2a1                    | 1.395236 |
| A_68_P10640236 | Nid1                      | 1.39522  |
| A_68_P06609275 | Dmn                       | 1.394924 |
| A_68_P14458284 | Slc3a2                    | 1.39487  |
| A_68_P03811052 | 4732473B16Rik             | 1.394516 |
| A_68_P09618735 | Aldoc                     | 1.394351 |
| A_68_P05514834 | 4921507P07Rik             | 1.394225 |
| A_68_P02810083 | ENSMUST00000083570.1:-374 | 1.393739 |
| A_68_P02173326 | Smtnl1-Timm10             | 1.393303 |
| A_68_P13291042 | Fkbpl                     | 1.393011 |
| A_68_P04003810 | Gpx7                      | 1.39278  |
| A_68_P12052843 | AW549877                  | 1.392723 |
| A_68_P08425563 | Lss                       | 1.392357 |
| A_68_P09177531 | Atp5g1                    | 1.392234 |
| A_68_P05954798 | Tmem160                   | 1.391956 |
| A_68_P09539387 | Tnfsf12                   | 1.39175  |
| A_68_P11890247 | Rbm9                      | 1.391445 |
| A_68_P01251035 | Gfra4                     | 1.391445 |
| A_68_P09628737 | Meis1                     | 1.391253 |
| A_68_P08054984 | Rbpms2                    | 1.390078 |
| A_68_P08980723 | 4933414I15Rik             | 1.389525 |
| A_68_P06124550 | Ifitm6                    | 1.389417 |
| A_68_P00640827 | Adipor1                   | 1.389397 |
| A_68_P14737878 | Ppp1r3f                   | 1.38934  |
| A_68_P08546101 | Rdh7                      | 1.389291 |
| A_68_P14765505 | Eda                       | 1.389147 |
| A_68_P07485273 | D930028F11Rik             | 1.389121 |
| A_68_P02452306 | Lxn                       | 1.388964 |

|                |                            |          |
|----------------|----------------------------|----------|
| A_68_P13728082 | Lims2                      | 1.388765 |
| A_68_P04756674 | Nsun5                      | 1.388709 |
| A_68_P00379196 | Slc11a1                    | 1.388581 |
| A_68_P04267219 | Emid2                      | 1.388229 |
| A_68_P04202508 | 2900002H16Rik              | 1.388114 |
| A_68_P06523791 | Zfp94                      | 1.388046 |
| A_68_P00761121 | 5033414K04Rik              | 1.387774 |
| A_68_P00641555 | Nr1i3                      | 1.387621 |
| A_68_P14323652 | Sfxn3                      | 1.387516 |
| A_68_P08043009 | ENSMUST00000040025.5:86676 | 1.387397 |
| A_68_P04600442 | Gak-Tmem175                | 1.387309 |
| A_68_P12927819 | Hrg                        | 1.387228 |
| A_68_P10211435 | Slc25a29                   | 1.386406 |
| A_68_P03323239 | Hsd12                      | 1.386274 |
| A_68_P13551633 | Socs5                      | 1.386213 |
| A_68_P09357796 | Rara                       | 1.385957 |
| A_68_P07210532 | F10                        | 1.385922 |
| A_68_P06420209 | Ath11                      | 1.385804 |
| A_68_P03324692 | H6pd                       | 1.385694 |
| A_68_P03533898 | Nbl1                       | 1.385539 |
| A_68_P07272472 | Zcchc14                    | 1.385187 |
| A_68_P09536877 | Pnmt                       | 1.38475  |
| A_68_P04564491 | Arpc1a                     | 1.384418 |
| A_68_P14408920 | Sart1                      | 1.384268 |
| A_68_P06181223 | Abcc6                      | 1.384253 |
| A_68_P13214626 | Trip10                     | 1.384146 |
| A_68_P03703507 | Srrp                       | 1.383383 |
| A_68_P07924824 | Col7a1                     | 1.383194 |
| A_68_P06168316 | Isg2011                    | 1.382971 |
| A_68_P13117097 | Bak1                       | 1.382725 |
| A_68_P09525412 | Hes7                       | 1.3826   |
| A_68_P14349495 | Gna14                      | 1.382571 |
| A_68_P12448089 | Csnk1e                     | 1.382542 |
| A_68_P07844432 | Tmem25                     | 1.38221  |
| A_68_P03513133 | Elovl1                     | 1.382112 |

|                |                     |          |
|----------------|---------------------|----------|
| A_68_P05591343 | Zyx                 | 1.381698 |
| A_68_P07341251 | Spata4              | 1.381511 |
| A_68_P11890938 | Slc25a17            | 1.38148  |
| A_68_P04403726 | En2                 | 1.381455 |
| A_68_P00206509 | St8sia4             | 1.381311 |
| A_68_P08464845 | ORF61               | 1.381265 |
| A_68_P03859840 | Kif12               | 1.38122  |
| A_68_P07068098 | Lamp1               | 1.381108 |
| A_68_P14154161 | Ina                 | 1.380776 |
| A_68_P01828463 | Cobll1              | 1.380624 |
| A_68_P12199090 | 4930572J05Rik       | 1.380609 |
| A_68_P11754145 | Mapk8               | 1.38022  |
| A_68_P12003446 | Oxct1               | 1.380044 |
| A_68_P13367496 | Trim26              | 1.379473 |
| A_68_P01293536 | A530013C23Rik       | 1.379134 |
| A_68_P01574979 | Nnat                | 1.378923 |
| A_68_P07651826 | Camkv               | 1.378867 |
| A_68_P06272860 | 2410127E16Rik       | 1.378846 |
| A_68_P14428140 | Tlx1                | 1.378692 |
| A_68_P08043229 | BC031353            | 1.378254 |
| A_68_P00789027 | Ankrd39             | 1.377282 |
| A_68_P00072270 | Ptpn14              | 1.377265 |
| A_68_P13697471 | Pcdha5              | 1.3771   |
| A_68_P00207845 | Ncl                 | 1.37703  |
| A_68_P09368961 | Sox9                | 1.37696  |
| A_68_P07723898 | Sema3f              | 1.376629 |
| A_68_P04834757 | Cutl1               | 1.37658  |
| A_68_P11030208 | Ddx4-9130023D20Rik  | 1.376209 |
| A_68_P05933804 | Thrsp               | 1.375919 |
| A_68_P09648521 | Hdac5               | 1.375745 |
| A_68_P13075872 | Mas1-Mrgprh         | 1.3757   |
| A_68_P14228457 | Rrp12               | 1.375458 |
| A_68_P12150006 | Kif21a              | 1.375324 |
| A_68_P00227415 | Osgepl1             | 1.375116 |
| A_68_P10301168 | Tgfb3-1700019E19Rik | 1.375113 |

|                |               |          |
|----------------|---------------|----------|
| A_68_P07828149 | Rbpms2        | 1.374737 |
| A_68_P13428964 | 1700001C19Rik | 1.374676 |
| A_68_P11712816 | Atp8a2        | 1.374544 |
| A_68_P14706457 | Diap2         | 1.374526 |
| A_68_P08036926 | Chst2         | 1.374478 |
| A_68_P07629982 | Tmed1         | 1.374422 |
| A_68_P15177716 | 4933436I01Rik | 1.37438  |
| A_68_P02034225 | Itga6         | 1.374306 |
| A_68_P00656928 | 2500001K11Rik | 1.373611 |
| A_68_P11166311 | Clu           | 1.373603 |
| A_68_P02148570 | 1700123D08Rik | 1.373449 |
| A_68_P03059990 | Ptgfr         | 1.373345 |
| A_68_P11855104 | 5730410E15Rik | 1.372925 |
| A_68_P08315623 | Ddt           | 1.3729   |
| A_68_P02004607 | Gm1631        | 1.3727   |
| A_68_P11708828 | Rnase10       | 1.372173 |
| A_68_P06867905 | Slc5a5        | 1.372124 |
| A_68_P05960647 | 4930451I11Rik | 1.371871 |
| A_68_P06274249 | Klf13         | 1.371567 |
| A_68_P00552869 | Capn8         | 1.371189 |
| A_68_P13867110 | Pard6g        | 1.371174 |
| A_68_P11529416 | Mtmr9         | 1.370879 |
| A_68_P11537416 | Nisch-Tnnc1   | 1.370867 |
| A_68_P05838606 | Cd9           | 1.370573 |
| A_68_P03583518 | Thrap3        | 1.369934 |
| A_68_P08840694 | Arid3a        | 1.369653 |
| A_68_P04346888 | Ppp2r2c       | 1.369525 |
| A_68_P03833504 | Pink1         | 1.369238 |
| A_68_P13871637 | Ndst1         | 1.369179 |
| A_68_P03635372 | Plekhf2       | 1.36905  |
| A_68_P03185907 | Enpep         | 1.368886 |
| A_68_P06314101 | Myo7a         | 1.3688   |
| A_68_P14369063 | Scd4          | 1.36879  |
| A_68_P01619771 | Insm1         | 1.368782 |
| A_68_P07024704 | 1700029J07Rik | 1.368462 |

|                |               |          |
|----------------|---------------|----------|
| A_68_P07678840 | 2010110K16Rik | 1.368421 |
| A_68_P08396865 | Crsp3         | 1.368407 |
| A_68_P07748462 | Rpp25         | 1.368336 |
| A_68_P05732548 | Arhgdib-Pde6h | 1.368284 |
| A_68_P08485276 | Rfx4          | 1.368004 |
| A_68_P12500292 | Epha3         | 1.36753  |
| A_68_P01164453 | Slc24a5       | 1.367509 |
| A_68_P07503953 | Crabp1        | 1.366513 |
| A_68_P12128709 | Racgap1       | 1.366488 |
| A_68_P11567764 | 4930578I06Rik | 1.366367 |
| A_68_P13126791 | Atp6v1g2      | 1.366292 |
| A_68_P09050623 | Bzrap1        | 1.366273 |
| A_68_P01920530 | Uap111        | 1.365508 |
| A_68_P08826802 | Hkdc1         | 1.365491 |
| A_68_P07536331 | Lrrn6a        | 1.365224 |
| A_68_P14899047 | Tsc22d3       | 1.365062 |
| A_68_P04488676 | Slc26a1       | 1.365019 |
| A_68_P13251986 | Srrm2         | 1.364884 |
| A_68_P14153156 | Chuk          | 1.364786 |
| A_68_P07306676 | Car5a         | 1.364733 |
| A_68_P02581370 | Wnt2b         | 1.364599 |
| A_68_P12191245 | Dgat1         | 1.364556 |
| A_68_P12062341 | Pla2g6        | 1.364451 |
| A_68_P01288757 | Slc20a1       | 1.364246 |
| A_68_P13415559 | Sepx1         | 1.364204 |
| A_68_P06122746 | Car11         | 1.364025 |
| A_68_P00719131 | Lad1          | 1.363767 |
| A_68_P08773799 | Dnajc14       | 1.363732 |
| A_68_P03075997 | Dcamkl2       | 1.363686 |
| A_68_P03535794 | Tal2          | 1.363617 |
| A_68_P05541947 | Reep1         | 1.363366 |
| A_68_P12788633 | Tmem41a       | 1.363233 |
| A_68_P06292783 | Sae1          | 1.363202 |
| A_68_P07400446 | Snai3         | 1.363009 |
| A_68_P07089321 | Foxl1         | 1.362602 |

|                |                      |          |
|----------------|----------------------|----------|
| A_68_P09575212 | Rsad1                | 1.362435 |
| A_68_P06599176 | Grin2d-Kdelr1        | 1.362242 |
| A_68_P05358487 | Rassf8               | 1.362197 |
| A_68_P03721921 | Dhcr24               | 1.361967 |
| A_68_P04420388 | Grsf1                | 1.361566 |
| A_68_P01440416 | Fbxw2                | 1.361542 |
| A_68_P03513105 | Elov11               | 1.361494 |
| A_68_P13560632 | Slc22a7              | 1.361343 |
| A_68_P07200483 | Ier2                 | 1.361322 |
| A_68_P06195728 | AY078069             | 1.361173 |
| A_68_P06115762 | Cacng3               | 1.360879 |
| A_68_P00995269 | Atp1b1               | 1.360712 |
| A_68_P08538267 | Gnptab               | 1.36063  |
| A_68_P04899188 | Ubc                  | 1.360629 |
| A_68_P12126766 | Tmprss6              | 1.36032  |
| A_68_P06375734 | Ccdc106              | 1.360018 |
| A_68_P07976988 | 4733401H18Rik-Dalrd3 | 1.359907 |
| A_68_P14109314 | Osbpl1a              | 1.35965  |
| A_68_P05119378 | Tspan33              | 1.359378 |
| A_68_P07596637 | Vsig2                | 1.359271 |
| A_68_P08299334 | 1700021F05Rik        | 1.359211 |
| A_68_P09638194 | Rad5113              | 1.359125 |
| A_68_P04979692 | 9430057O19Rik        | 1.359009 |
| A_68_P01943459 | Ctsz                 | 1.358991 |
| A_68_P01342941 | Ass1                 | 1.358922 |
| A_68_P05437345 | Rtkn                 | 1.358591 |
| A_68_P05075148 | Scnn1a               | 1.358582 |
| A_68_P02474696 | Eltd1                | 1.358534 |
| A_68_P12638874 | Tbx1-4930588K23Rik   | 1.358483 |
| A_68_P00905137 | B3gnt7               | 1.358442 |
| A_68_P00812329 | Pou3f3               | 1.358345 |
| A_68_P00400075 | Kif1a                | 1.358243 |
| A_68_P09179041 | 1110067D22Rik        | 1.358208 |
| A_68_P14605630 | Hcfc1                | 1.358173 |
| A_68_P11319776 | Stk24                | 1.358142 |

|                |                 |          |
|----------------|-----------------|----------|
| A_68_P12415129 | 1700019P01Rik   | 1.357988 |
| A_68_P03176910 | 6530418L21Rik   | 1.357851 |
| A_68_P07818473 | Eva1            | 1.357778 |
| A_68_P08530152 | Cnn2            | 1.357437 |
| A_68_P11966159 | Pkdrej-AW124722 | 1.356999 |
| A_68_P03730091 | Ube2j2          | 1.356958 |
| A_68_P07588985 | Birc3           | 1.356853 |
| A_68_P13069277 | Zfp161          | 1.356576 |
| A_68_P11800686 | Syt15           | 1.35645  |
| A_68_P05752699 | Impdh1          | 1.355613 |
| A_68_P01348835 | Kynu            | 1.355327 |
| A_68_P03726231 | Ptprf           | 1.355176 |
| A_68_P14910238 | Ids             | 1.355112 |
| A_68_P12441858 | Adamts20        | 1.354793 |
| A_68_P06470224 | Bet11-Ric8      | 1.354612 |
| A_68_P08490715 | Ggt1            | 1.354475 |
| A_68_P09250239 | Zfp672          | 1.354305 |
| A_68_P00194128 | Cacybp          | 1.354282 |
| A_68_P00245688 | Ttll4           | 1.35397  |
| A_68_P15159838 | Rhox6           | 1.353884 |
| A_68_P11014513 | Otp             | 1.353793 |
| A_68_P06127908 | Pak1            | 1.353515 |
| A_68_P01378985 | Cacnb4          | 1.353068 |
| A_68_P06872414 | Efcbp2          | 1.35301  |
| A_68_P09349698 | 2400006H24Rik   | 1.352811 |
| A_68_P03720734 | Mmel1           | 1.352229 |
| A_68_P04567641 | A230097K15Rik   | 1.352088 |
| A_68_P12713735 | Atp5o           | 1.352055 |
| A_68_P13981763 | Mapk4           | 1.352013 |
| A_68_P10157510 | A_68_P10157510  | 1.351816 |
| A_68_P01345408 | Api5            | 1.351781 |
| A_68_P08903907 | Tspan31-Centg1  | 1.351778 |
| A_68_P09628625 | Tmem88          | 1.351453 |
| A_68_P06984570 | Psmc7           | 1.3512   |
| A_68_P10760640 | Gas1            | 1.35105  |

|                |                            |          |
|----------------|----------------------------|----------|
| A_68_P07401386 | B3gnt3                     | 1.35097  |
| A_68_P14061985 | Egr1                       | 1.350666 |
| A_68_P05548217 | Chd4                       | 1.35064  |
| A_68_P00719128 | Lad1                       | 1.350552 |
| A_68_P13349409 | Sfrs3                      | 1.35002  |
| A_68_P07074552 | Usp38                      | 1.349978 |
| A_68_P06626995 | Hmx2                       | 1.34984  |
| A_68_P14461348 | Cdca5                      | 1.349516 |
| A_68_P13134961 | Tnfrsf21                   | 1.349149 |
| A_68_P08666230 | Hnrph3                     | 1.349019 |
| A_68_P05231743 | Zfp384                     | 1.348981 |
| A_68_P13556997 | Tsga2                      | 1.348651 |
| A_68_P06087354 | Pnpla2                     | 1.34814  |
| A_68_P09645952 | OTTMUSG00000000934         | 1.347966 |
| A_68_P09548393 | Aoc3                       | 1.347929 |
| A_68_P12242248 | Syngn1                     | 1.347821 |
| A_68_P06438476 | Saps1                      | 1.347799 |
| A_68_P04546156 | Trfr2                      | 1.347261 |
| A_68_P00626532 | Atf3                       | 1.347158 |
| A_68_P05679178 | Camk1                      | 1.347021 |
| A_68_P04731285 | Kl                         | 1.346698 |
| A_68_P09413265 | Adam11                     | 1.34647  |
| A_68_P14431117 | Sfl                        | 1.346376 |
| A_68_P11247425 | Entpd4                     | 1.346079 |
| A_68_P12255657 | Baiap2l2                   | 1.345019 |
| A_68_P05228148 | H1fx                       | 1.344989 |
| A_68_P09645961 | OTTMUSG00000000934         | 1.344915 |
| A_68_P09582843 | Itga3                      | 1.344811 |
| A_68_P13067632 | Pkd1                       | 1.344641 |
| A_68_P06393479 | A830041P22Rik-BC028440     | 1.344343 |
| A_68_P14849214 | ENSMUST00000037596.5:-5074 | 1.344303 |
| A_68_P08314943 | Oaz1                       | 1.344037 |
| A_68_P12151407 | 2010109I03Rik              | 1.344025 |
| A_68_P12018996 | Pfkm                       | 1.34388  |
| A_68_P11972173 | Rabl4                      | 1.343842 |



|                |               |          |
|----------------|---------------|----------|
| A_68_P09009571 | Olfir223      | 1.343837 |
| A_68_P13834333 | Srfbp1        | 1.343547 |
| A_68_P04966921 | Rpl21         | 1.34327  |
| A_68_P05448304 | Kcna5         | 1.34313  |
| A_68_P09434018 | Cntnap1       | 1.343124 |
| A_68_P08882556 | Ptbp1         | 1.343073 |
| A_68_P13465706 | Caskin1       | 1.342849 |
| A_68_P15092233 | Armxc2        | 1.342413 |
| A_68_P06431967 | Siglecf       | 1.342322 |
| A_68_P06765322 | Wwc2          | 1.342304 |
| A_68_P06275315 | Rgs10         | 1.34221  |
| A_68_P09598068 | Acox1         | 1.34209  |
| A_68_P06184102 | Ech1          | 1.341959 |
| A_68_P02032727 | Arl6ip6       | 1.341798 |
| A_68_P01606835 | Prnd          | 1.341071 |
| A_68_P01986063 | Mcm8          | 1.341042 |
| A_68_P00064328 | Mpz11         | 1.340992 |
| A_68_P03984305 | Nfib          | 1.340978 |
| A_68_P09359466 | Sphk1         | 1.340949 |
| A_68_P15009258 | Gm784         | 1.340896 |
| A_68_P08066246 | Slc38a3       | 1.340809 |
| A_68_P10492574 | Ippk          | 1.340586 |
| A_68_P03245499 | Ripk2         | 1.340568 |
| A_68_P12451934 | Card10        | 1.340293 |
| A_68_P00451766 | Nmnat2        | 1.340258 |
| A_68_P12449654 | Ankrd46       | 1.34017  |
| A_68_P09136314 | Baiap2        | 1.33999  |
| A_68_P04834404 | Lphn3         | 1.339827 |
| A_68_P07359887 | Cox4i1        | 1.339736 |
| A_68_P03953505 | Ppp1r8        | 1.338938 |
| A_68_P10293201 | Sel1l         | 1.338653 |
| A_68_P05099470 | Cpne9         | 1.338103 |
| A_68_P01963655 | 4932418E24Rik | 1.337979 |
| A_68_P06985598 | Pkd112        | 1.337707 |
| A_68_P12908674 | Magmas        | 1.337585 |

|                |               |          |
|----------------|---------------|----------|
| A_68_P13075867 | Mas1-Mrgprh   | 1.337503 |
| A_68_P00991622 | Capn8         | 1.337252 |
| A_68_P03920582 | Fgr           | 1.337216 |
| A_68_P14989894 | Ap1s2         | 1.336982 |
| A_68_P13434054 | B3galt4       | 1.33697  |
| A_68_P13503529 | C130040N14Rik | 1.336904 |
| A_68_P07574923 | Coro2b        | 1.336902 |
| A_68_P09736098 | Hba-a1        | 1.336646 |
| A_68_P05904665 | Hpxn          | 1.33661  |
| A_68_P02091744 | Ncoa5         | 1.33604  |
| A_68_P04277969 | Rnf32         | 1.336019 |
| A_68_P10974783 | Prr7          | 1.335538 |
| A_68_P09559562 | Shmt1         | 1.335522 |
| A_68_P01722996 | Pck1          | 1.335297 |
| A_68_P13119759 | Nkx2-5        | 1.335287 |
| A_68_P09307716 | Doc2b         | 1.335262 |
| A_68_P01640329 | Btbd3         | 1.334992 |
| A_68_P05891727 | Grik5-Zfp574  | 1.334977 |
| A_68_P08935364 | Fyn           | 1.334879 |
| A_68_P04731732 | Sdsl          | 1.334687 |
| A_68_P08173101 | Cyp8b1        | 1.334479 |
| A_68_P02160813 | Inpp5e        | 1.334385 |
| A_68_P05402372 | Itp2          | 1.334203 |
| A_68_P02442112 | Car14         | 1.334153 |
| A_68_P00999801 | Avpr1b        | 1.334075 |
| A_68_P11406546 | Ang1          | 1.333952 |
| A_68_P06078807 | Zfp446        | 1.333811 |
| A_68_P01275891 | Figf          | 1.333792 |
| A_68_P03274719 | Cd72          | 1.333666 |
| A_68_P08894637 | Tle2          | 1.333629 |
| A_68_P09538169 | D11Ert18e     | 1.333536 |
| A_68_P09229843 | Sec14l1       | 1.333494 |
| A_68_P02989786 | Neurog2       | 1.333308 |
| A_68_P07876589 | Fbxo9-Ick     | 1.333285 |
| A_68_P04608378 | Rnf6-Cdk8     | 1.333156 |

|                |               |          |
|----------------|---------------|----------|
| A_68_P03673261 | B3galt6       | 1.333018 |
| A_68_P08073169 | Apeh          | 1.332935 |
| A_68_P02046877 | Egfl7         | 1.332874 |
| A_68_P11311203 | Lrtm1         | 1.332561 |
| A_68_P02305769 | Pld1          | 1.332537 |
| A_68_P11019594 | Uimc1-Zfp346  | 1.33245  |
| A_68_P08629268 | Hkdc1         | 1.33233  |
| A_68_P03854965 | Marcks11      | 1.332236 |
| A_68_P04636799 | Nub1          | 1.332012 |
| A_68_P05342558 | Gfpt1         | 1.331959 |
| A_68_P14314015 | Ehd1          | 1.331856 |
| A_68_P12871001 | Sema5b        | 1.331684 |
| A_68_P12584046 | 2310061J03Rik | 1.331668 |
| A_68_P01424824 | Rbl1          | 1.331663 |
| A_68_P12017322 | Cbx7          | 1.331613 |
| A_68_P06653585 | Plekha4       | 1.331332 |
| A_68_P06406870 | Zik1          | 1.33098  |
| A_68_P06243313 | Klk10         | 1.33087  |
| A_68_P11609980 | Jub           | 1.330582 |
| A_68_P07010746 | Abhd8         | 1.330312 |
| A_68_P01717991 | Btbd14a       | 1.330029 |
| A_68_P03535794 | Tal2          | 1.330011 |

**Supplementary Table 6b: N vs KOA 150 hypomethylation genes on d16**

| Probe Name     | Gene Name            | Methylation difference value |
|----------------|----------------------|------------------------------|
| A_68_P12755374 | App                  | 0.047829                     |
| A_68_P07910003 | Elavl3               | 0.135364                     |
| A_68_P12853498 | Mx2                  | 0.150429                     |
| A_68_P04734427 | Shroom3              | 0.175271                     |
| A_68_P01769357 | Mrg1                 | 0.187045                     |
| A_68_P10449774 | 2410002O22Rik-Trim23 | 0.288886                     |
| A_68_P12217051 | 9130401M01Rik        | 0.292903                     |
| A_68_P02404444 | Cxxc4                | 0.305886                     |
| A_68_P13251244 | Cyp4f13              | 0.367237                     |
| A_68_P09049964 | Gria1                | 0.417974                     |
| A_68_P13251243 | Cyp4f13              | 0.420593                     |
| A_68_P07592424 | Lbxcor1              | 0.421406                     |
| A_68_P14259486 | Rfx3                 | 0.425236                     |
| A_68_P06810073 | Aadat                | 0.430781                     |
| A_68_P14586192 | Irs4                 | 0.435363                     |
| A_68_P10208303 | Brms11               | 0.458816                     |
| A_68_P12423891 | Rnd1                 | 0.465988                     |
| A_68_P14659932 | Slc25a5              | 0.481463                     |
| A_68_P06177032 | Rgs9bp               | 0.500148                     |
| A_68_P05492016 | Mkrm1                | 0.522946                     |
| A_68_P12536557 | BC027231             | 0.527749                     |
| A_68_P03944620 | E130114P18Rik        | 0.550509                     |
| A_68_P01268520 | Zfhx1b               | 0.556625                     |
| A_68_P12360632 | Zhx2                 | 0.560654                     |
| A_68_P04895996 | Mapk10               | 0.561765                     |
| A_68_P04277065 | Cxcl1                | 0.561935                     |
| A_68_P04480991 | Wfs1                 | 0.56214                      |
| A_68_P05918908 | Peg3                 | 0.571169                     |
| A_68_P00552426 | Dst                  | 0.572084                     |
| A_68_P04262240 | Mapk10               | 0.574887                     |
| A_68_P03075963 | Rap1gds1             | 0.57979                      |
| A_68_P05122196 | Fkbp14-Plekha8       | 0.58038                      |
| A_68_P03545245 | Casp8ap2             | 0.58824                      |

|                |               |          |
|----------------|---------------|----------|
| A_68_P04846731 | Rasgef1b      | 0.597842 |
| A_68_P05162900 | Zfml          | 0.602215 |
| A_68_P08629638 | Ddt           | 0.60239  |
| A_68_P13119458 | Dscr111       | 0.607516 |
| A_68_P08440358 | Ahi1          | 0.60832  |
| A_68_P11564394 | 9430077A04Rik | 0.612977 |
| A_68_P14628736 | 6430550H21Rik | 0.619227 |
| A_68_P09233032 | Anxa6         | 0.61975  |
| A_68_P07327905 | Slc6a2        | 0.62084  |
| A_68_P09296258 | Hspa4         | 0.637876 |
| A_68_P13992999 | Pcdhgb2       | 0.641232 |
| A_68_P09689225 | Wbp2          | 0.643284 |
| A_68_P03553526 | Vamp3         | 0.645106 |
| A_68_P14001180 | Aldh7a1       | 0.650569 |
| A_68_P09955204 | Fut8          | 0.655423 |
| A_68_P04763153 | Rasal1        | 0.657537 |
| A_68_P04247170 | Zfp326        | 0.658156 |
| A_68_P14292416 | Hps6          | 0.660772 |
| A_68_P11328115 | Otx2          | 0.660979 |
| A_68_P09134526 | Lhx1          | 0.662558 |
| A_68_P03553526 | Vamp3         | 0.666399 |
| A_68_P04277062 | Cxcl1         | 0.673531 |
| A_68_P07704674 | Opcml         | 0.675132 |
| A_68_P14519995 | Bmx           | 0.677734 |
| A_68_P11069910 | Gcnt2         | 0.679741 |
| A_68_P14336511 | Arhgap19      | 0.68037  |
| A_68_P04218037 | Tbx3          | 0.681135 |
| A_68_P09575135 | BC025575      | 0.681867 |
| A_68_P02032707 | Prpf40a       | 0.684072 |
| A_68_P01024689 | Mosc2         | 0.684117 |
| A_68_P09095193 | Rhbdd3        | 0.684994 |
| A_68_P10561224 | Fbxl21        | 0.685629 |
| A_68_P11960760 | Pick1         | 0.687702 |
| A_68_P11825632 | Ptprg         | 0.690785 |
| A_68_P06075223 | Aplp1         | 0.692372 |

|                |                     |          |
|----------------|---------------------|----------|
| A_68_P00221558 | Prrx1               | 0.692959 |
| A_68_P04844116 | Cxcl4               | 0.694124 |
| A_68_P13657420 | Pias2               | 0.695675 |
| A_68_P00098491 | Astn1               | 0.696062 |
| A_68_P07379781 | Tomm20              | 0.696558 |
| A_68_P11465874 | Tsc22d1             | 0.699961 |
| A_68_P02070587 | Zswim3              | 0.700566 |
| A_68_P00478505 | Pax3                | 0.701502 |
| A_68_P07949632 | Gramd1b             | 0.701855 |
| A_68_P02870031 | Tnrc4               | 0.702077 |
| A_68_P00287878 | B3gat2              | 0.702756 |
| A_68_P06428107 | Zfp36               | 0.705494 |
| A_68_P07432747 | E130303B06Rik       | 0.706874 |
| A_68_P14103036 | Gm672               | 0.708007 |
| A_68_P13625730 | Cbln2               | 0.711191 |
| A_68_P13166533 | Ddah2               | 0.713225 |
| A_68_P06633063 | Stk32c              | 0.714689 |
| A_68_P14209573 | Rin1                | 0.715253 |
| A_68_P08111988 | Armet               | 0.716054 |
| A_68_P03211661 | 2610204G22Rik       | 0.717515 |
| A_68_P03780585 | Arhgef19            | 0.717638 |
| A_68_P13365467 | Rab11b              | 0.719827 |
| A_68_P03704070 | Dlgap3              | 0.720437 |
| A_68_P09782980 | Kcnf1               | 0.72053  |
| A_68_P12157937 | Cacnb3              | 0.721433 |
| A_68_P06660297 | Zfp536              | 0.721824 |
| A_68_P03676855 | Zfp189              | 0.721846 |
| A_68_P02733796 | 2010200O16Rik-Taf13 | 0.722795 |
| A_68_P02244930 | Zfp533              | 0.723196 |
| A_68_P01529996 | Fnbp4               | 0.723251 |
| A_68_P06099522 | Apoc1               | 0.725501 |
| A_68_P04040117 | 4732473B16Rik       | 0.725666 |
| A_68_P14844556 | Rs1                 | 0.72603  |
| A_68_P08462448 | Hint3               | 0.726933 |
| A_68_P12636185 | Lsg1                | 0.726944 |

|                |                |          |
|----------------|----------------|----------|
| A_68_P07827956 | Tbx20          | 0.727394 |
| A_68_P06632773 | Fxyd7          | 0.72763  |
| A_68_P09528972 | Zfp454         | 0.728529 |
| A_68_P06322596 | Kcnj11         | 0.729121 |
| A_68_P10569036 | Cep72          | 0.729511 |
| A_68_P11486688 | Lect1          | 0.733807 |
| A_68_P06143604 | Nell1          | 0.734952 |
| A_68_P10891937 | Foxq1          | 0.736229 |
| A_68_P03895474 | Sesn2          | 0.73625  |
| A_68_P11226211 | Hs6st3         | 0.736393 |
| A_68_P00012012 | Klf7           | 0.736507 |
| A_68_P13166532 | Ddah2          | 0.736669 |
| A_68_P04993451 | Ptpn11         | 0.736854 |
| A_68_P13382521 | Notch4         | 0.737645 |
| A_68_P04544688 | Tmem129-Tacc3  | 0.738028 |
| A_68_P04519890 | Kctd10         | 0.738175 |
| A_68_P11738050 | Homez          | 0.738653 |
| A_68_P04810796 | Stk32b         | 0.739159 |
| A_68_P07099607 | BC056474       | 0.739524 |
| A_68_P11989894 | Ptger4         | 0.740476 |
| A_68_P07178595 | Sf3b3          | 0.741103 |
| A_68_P10195731 | Arg2           | 0.742162 |
| A_68_P14645891 | Gemin8         | 0.742614 |
| A_68_P00488032 | Clk1           | 0.742704 |
| A_68_P12291916 | BC026404:12631 | 0.742741 |
| A_68_P07154161 | Eif4ebp1       | 0.742875 |
| A_68_P03484743 | Pax7           | 0.743264 |
| A_68_P06770253 | Fanca          | 0.743514 |
| A_68_P01193243 | Clp1           | 0.743544 |
| A_68_P13271870 | Gtf2h4         | 0.743926 |
| A_68_P02401082 | Ccdc109b       | 0.745035 |
| A_68_P04677545 | Msx1           | 0.745201 |
| A_68_P03328804 | Ube2j2         | 0.745247 |
| A_68_P10022213 | Foxa1          | 0.745399 |
| A_68_P03630403 | Asah3l         | 0.74561  |

|                |               |          |
|----------------|---------------|----------|
| A_68_P13340774 | 2410015M20Rik | 0.746131 |
| A_68_P04552017 | Dpp6          | 0.746241 |
| A_68_P10801669 | Mterfd1       | 0.746333 |
| A_68_P00351468 | Creg2         | 0.746835 |
| A_68_P03332653 | Foxe3         | 0.747046 |
| A_68_P13090368 | BC008155      | 0.747122 |
| A_68_P06740725 | 2400003C14Rik | 0.747455 |
| A_68_P05344583 | Tnfrsf1a      | 0.747548 |
| A_68_P02280033 | Mafb          | 0.748266 |
| A_68_P01569256 | Traf6         | 0.748417 |
| A_68_P09596165 | Rap2ip        | 0.749031 |
| A_68_P11235588 | Ccdc122       | 0.749449 |



**Supplementary Table 7a: N vs A 560 hypomethylation genes on d16**

| Probe Name     | Gene Name     | Methylation difference value |
|----------------|---------------|------------------------------|
| A_68_P08365020 | Tbc1d15       | 0.500869                     |
| A_68_P07008633 | Casp3         | 0.505797                     |
| A_68_P03003821 | Wnt2b         | 0.51527                      |
| A_68_P13848882 | Dym           | 0.522551                     |
| A_68_P06140698 | Arnt2         | 0.524945                     |
| A_68_P09691322 | 1200011M11Rik | 0.527728                     |
| A_68_P14154116 | Rbm4b         | 0.532604                     |
| A_68_P09444605 | Car4          | 0.538766                     |
| A_68_P03872557 | Tgfbr1        | 0.543096                     |
| A_68_P12490512 | Adamts1       | 0.543226                     |
| A_68_P11097546 | Sox4          | 0.547857                     |
| A_68_P09350088 | Pmp22         | 0.549097                     |
| A_68_P14498430 | Prkg1         | 0.552351                     |
| A_68_P01214289 | Nmt2          | 0.557171                     |
| A_68_P13129521 | Crebl1        | 0.558529                     |
| A_68_P01575537 | Sfrs6         | 0.560647                     |
| A_68_P12654503 | Rsl1d1        | 0.564131                     |
| A_68_P05149207 | Ptcd3-Rpo1-4  | 0.56449                      |
| A_68_P02060727 | Slc25a25      | 0.565203                     |
| A_68_P06001672 | Foxi2         | 0.569377                     |
| A_68_P06536662 | Ccdc106       | 0.574652                     |
| A_68_P11632577 | Zfp395        | 0.577971                     |
| A_68_P08062569 | Ei24          | 0.580041                     |
| A_68_P08848709 | Kcnmb4        | 0.580792                     |
| A_68_P06164674 | 1810054G18Rik | 0.581639                     |
| A_68_P02559788 | Pitx2         | 0.581992                     |
| A_68_P06076158 | Isoc2b        | 0.586721                     |
| A_68_P10987283 | 3110031B13Rik | 0.58899                      |
| A_68_P07532442 | Aph1b         | 0.589121                     |
| A_68_P08077709 | BC024479      | 0.589562                     |
| A_68_P10286533 | Cdca4         | 0.589872                     |
| A_68_P11399114 | Apex1         | 0.590815                     |
| A_68_P11342429 | Samd4         | 0.590989                     |

|                |                     |          |
|----------------|---------------------|----------|
| A_68_P06824946 | Foxfla              | 0.591817 |
| A_68_P09921275 | Ubx4                | 0.592623 |
| A_68_P09172983 | Sec14l4             | 0.593475 |
| A_68_P01869178 | Foxa2               | 0.59376  |
| A_68_P09729901 | Phb                 | 0.59491  |
| A_68_P00314170 | Idh1                | 0.596116 |
| A_68_P12412863 | Osr2                | 0.598148 |
| A_68_P06244528 | Tufm                | 0.598853 |
| A_68_P14410370 | Nkx2-3              | 0.598946 |
| A_68_P01360285 | Rbpsuhl             | 0.599538 |
| A_68_P08697303 | Helb                | 0.599588 |
| A_68_P01528714 | Rpl12               | 0.600795 |
| A_68_P07037395 | Ap3m2-1700041G16Rik | 0.601063 |
| A_68_P10774084 | Hist1h2bm           | 0.601549 |
| A_68_P06052141 | Unc45a-Hd3c3        | 0.601628 |
| A_68_P04106454 | BC057022            | 0.60198  |
| A_68_P07909840 | Sin3a               | 0.602733 |
| A_68_P03570669 | Fabp3               | 0.602833 |
| A_68_P14256098 | Npas4               | 0.603714 |
| A_68_P10243773 | Bcl11b              | 0.603817 |
| A_68_P05706787 | Plxnd1              | 0.606406 |
| A_68_P06573939 | Kcna7               | 0.606601 |
| A_68_P02577702 | Sox2                | 0.60721  |
| A_68_P05795898 | Bhlhb3              | 0.609601 |
| A_68_P06075074 | Ntrk3               | 0.609628 |
| A_68_P06352184 | BC053749            | 0.610676 |
| A_68_P00657988 | Farslb              | 0.612033 |
| A_68_P05972664 | 2210013K02Rik       | 0.612501 |
| A_68_P03352387 | BC057893            | 0.613578 |
| A_68_P11484995 | 3632451O06Rik       | 0.614658 |
| A_68_P05127678 | Epha1               | 0.616216 |
| A_68_P14720303 | Dnase1l1-Taz        | 0.616454 |
| A_68_P03556612 | Mllt3               | 0.61666  |
| A_68_P03899353 | A430005L14Rik       | 0.616919 |
| A_68_P13918711 | 1700034H14Rik       | 0.617072 |

|                |                          |          |
|----------------|--------------------------|----------|
| A_68_P07296368 | Sall1                    | 0.617074 |
| A_68_P06233151 | Tmem126b                 | 0.61718  |
| A_68_P01436221 | ENSMUST00000083577.1:189 | 0.61836  |
| A_68_P07152542 | Rab20                    | 0.619436 |
| A_68_P11726126 | Fgf9                     | 0.619572 |
| A_68_P09739785 | Per1                     | 0.620738 |
| A_68_P05156924 | Dysf                     | 0.621153 |
| A_68_P12005671 | Prpf40b                  | 0.621408 |
| A_68_P04677560 | Msx1                     | 0.622712 |
| A_68_P09136741 | Naglu                    | 0.622956 |
| A_68_P12223496 | Kcnq3                    | 0.623809 |
| A_68_P09632522 | Smurf2                   | 0.624083 |
| A_68_P06599561 | Armc5                    | 0.624283 |
| A_68_P08649166 | Stk11                    | 0.624447 |
| A_68_P07561476 | 2310005P05Rik            | 0.624928 |
| A_68_P11724373 | Ngdn                     | 0.625187 |
| A_68_P01674481 | Nusap1                   | 0.628065 |
| A_68_P11173083 | Abhd6                    | 0.628118 |
| A_68_P05488834 | Tac1                     | 0.62836  |
| A_68_P06464534 | Spnb4-Blvrb              | 0.628566 |
| A_68_P03746961 | Akr1a4                   | 0.628687 |
| A_68_P07901779 | Htr1b                    | 0.628812 |
| A_68_P05899940 | Qpctl-Snrpd2             | 0.628999 |
| A_68_P13693986 | Pou4f3                   | 0.629258 |
| A_68_P02286790 | Crabp2                   | 0.62966  |
| A_68_P06096075 | Adam12                   | 0.630096 |
| A_68_P10241916 | Vsnl1                    | 0.63036  |
| A_68_P12016231 | Serhl                    | 0.631152 |
| A_68_P11569601 | Ebf2                     | 0.631364 |
| A_68_P05308590 | Cav1                     | 0.632142 |
| A_68_P03022365 | Rusc1                    | 0.632663 |
| A_68_P09525406 | Hes7                     | 0.632704 |
| A_68_P01778274 | Sema6d                   | 0.63312  |
| A_68_P05254993 | Tra2a                    | 0.633871 |
| A_68_P00716966 | Tnfrsf11a                | 0.634232 |

|                |               |          |
|----------------|---------------|----------|
| A_68_P14065754 | Colec12       | 0.635747 |
| A_68_P05006204 | Hist4h4       | 0.63607  |
| A_68_P09461692 | 1700020C11Rik | 0.636428 |
| A_68_P09073254 | Vat1-Rnd2     | 0.636471 |
| A_68_P01491127 | Acvr2a        | 0.636508 |
| A_68_P13182576 | Abcgl         | 0.637155 |
| A_68_P12672584 | Polr2h        | 0.63736  |
| A_68_P13331861 | Tgif          | 0.637449 |
| A_68_P03476394 | Ssbp3         | 0.637874 |
| A_68_P05727103 | Npy           | 0.63871  |
| A_68_P06273550 | Adm           | 0.639223 |
| A_68_P12837500 | Cryzl1        | 0.639716 |
| A_68_P12798251 | Pak2          | 0.639724 |
| A_68_P05795785 | Shfm1         | 0.6399   |
| A_68_P14408416 | Ubtd1         | 0.640124 |
| A_68_P09239666 | 1300013J15Rik | 0.640203 |
| A_68_P11069210 | Shc3          | 0.640934 |
| A_68_P10594937 | Lysmd3        | 0.641373 |
| A_68_P00936375 | Lhx9          | 0.641751 |
| A_68_P02074278 | Frmd5         | 0.641907 |
| A_68_P00051079 | Sulf1         | 0.642317 |
| A_68_P04677554 | Msx1          | 0.642591 |
| A_68_P12236506 | Dap           | 0.642604 |
| A_68_P01674488 | Oip5          | 0.642932 |
| A_68_P06544721 | Rpl13a        | 0.644186 |
| A_68_P05906990 | Snx26         | 0.645498 |
| A_68_P05827499 | 2500002L14Rik | 0.645502 |
| A_68_P09559156 | Igfbp4        | 0.645884 |
| A_68_P01864417 | Brd3          | 0.646402 |
| A_68_P09103595 | Igf2bp1       | 0.64737  |
| A_68_P04101451 | Gsh2          | 0.647661 |
| A_68_P09276835 | Hoxb9         | 0.647898 |
| A_68_P06369055 | Arrdc4        | 0.648964 |
| A_68_P09198633 | Atp5h         | 0.649331 |
| A_68_P07679467 | Celsr3        | 0.650478 |

|                |               |          |
|----------------|---------------|----------|
| A_68_P07699697 | Rtp3          | 0.650493 |
| A_68_P03801846 | Phf13         | 0.650911 |
| A_68_P09084915 | Gprc5c        | 0.652366 |
| A_68_P05634149 | Hoxa13        | 0.652827 |
| A_68_P01947374 | Sp9           | 0.653133 |
| A_68_P09218218 | Tnfaip1       | 0.653137 |
| A_68_P01869679 | Zdhhc5        | 0.654147 |
| A_68_P05640423 | Ldhb          | 0.654679 |
| A_68_P03076435 | Pde4dip       | 0.654979 |
| A_68_P00415705 | Hlx1          | 0.655652 |
| A_68_P01451276 | Casc4         | 0.656031 |
| A_68_P07734331 | Hyal2         | 0.656151 |
| A_68_P11625862 | Kcnma1        | 0.656939 |
| A_68_P11246055 | Fgf17         | 0.656969 |
| A_68_P12707530 | Chrd          | 0.657628 |
| A_68_P14015396 | Grp           | 0.658852 |
| A_68_P11100963 | Inhba         | 0.658978 |
| A_68_P05606420 | Hoxa13        | 0.65918  |
| A_68_P05552662 | Gabarapl1     | 0.65986  |
| A_68_P05433825 | Gm839         | 0.660255 |
| A_68_P13882854 | Reep2         | 0.660606 |
| A_68_P01596218 | Rasgrp1       | 0.660644 |
| A_68_P05297811 | 4833442J19Rik | 0.662314 |
| A_68_P07021650 | Dusp4         | 0.663313 |
| A_68_P13396158 | Dusp1         | 0.664528 |
| A_68_P09434031 | Cntnap1       | 0.664996 |
| A_68_P12371495 | BC038822      | 0.664996 |
| A_68_P10682988 | Hist1h4a      | 0.665724 |
| A_68_P14396595 | Aldh18a1      | 0.66577  |
| A_68_P13076456 | Smoc2         | 0.66595  |
| A_68_P08007504 | Ilf3          | 0.666054 |
| A_68_P04108821 | 1110039B18Rik | 0.666436 |
| A_68_P05445839 | Shfm1         | 0.666564 |
| A_68_P04504710 | Grsf1         | 0.666592 |
| A_68_P12421448 | Mchr1         | 0.66754  |

|                |                             |          |
|----------------|-----------------------------|----------|
| A_68_P02931199 | Tspan5                      | 0.667541 |
| A_68_P13267430 | Pcaf                        | 0.667837 |
| A_68_P01410881 | Gca                         | 0.667847 |
| A_68_P04862538 | Sema3a                      | 0.667917 |
| A_68_P01312041 | 2310002J15Rik-1110061N23Rik | 0.668167 |
| A_68_P04955575 | Flt3                        | 0.668682 |
| A_68_P13300383 | AW049765-E130307M08Rik      | 0.668916 |
| A_68_P13413621 | Ankrd47                     | 0.66939  |
| A_68_P02200717 | Tspyl3                      | 0.669536 |
| A_68_P04768576 | Nkx6-1                      | 0.669538 |
| A_68_P02016914 | Itgav                       | 0.670073 |
| A_68_P11739620 | Gata4                       | 0.670078 |
| A_68_P12310639 | Hoxc8                       | 0.670117 |
| A_68_P09071666 | Mgat1                       | 0.670292 |
| A_68_P04973104 | Wipi2                       | 0.670292 |
| A_68_P08866199 | Ascl1                       | 0.670377 |
| A_68_P05808766 | Bhlhb2                      | 0.670524 |
| A_68_P10518868 | Foxf2                       | 0.671423 |
| A_68_P03995832 | Syf2                        | 0.671539 |
| A_68_P04937975 | Ncor2                       | 0.672068 |
| A_68_P03938391 | Pefl                        | 0.672175 |
| A_68_P09850298 | Smoc1                       | 0.672245 |
| A_68_P05877424 | Tspan33                     | 0.672277 |
| A_68_P02689603 | Arnt                        | 0.672748 |
| A_68_P06165260 | Mark4                       | 0.673008 |
| A_68_P06906180 | Ap1m1                       | 0.673236 |
| A_68_P02571344 | Cnn3                        | 0.673371 |
| A_68_P14281079 | Psat1                       | 0.673424 |
| A_68_P06782036 | Alg11                       | 0.67361  |
| A_68_P09485731 | Tbx4                        | 0.674532 |
| A_68_P01232646 | Cst3                        | 0.674726 |
| A_68_P08634266 | Sf3a2                       | 0.675215 |
| A_68_P03115033 | Gria2                       | 0.675506 |
| A_68_P11569567 | Ebf2                        | 0.6758   |
| A_68_P14872362 | Utx                         | 0.675807 |

|                |                |          |
|----------------|----------------|----------|
| A_68_P03809665 | Klf4           | 0.676694 |
| A_68_P03801846 | Phf13          | 0.676953 |
| A_68_P01125928 | Ubx2           | 0.677638 |
| A_68_P14081599 | 5730405I09Rik  | 0.678002 |
| A_68_P08158875 | 9030425E11Rik  | 0.67822  |
| A_68_P11446136 | Bmp4           | 0.678515 |
| A_68_P07318780 | Gcsh           | 0.679011 |
| A_68_P03946036 | Ptplad2        | 0.679133 |
| A_68_P08284610 | Amd2           | 0.679558 |
| A_68_P06965890 | Bcnp1          | 0.679957 |
| A_68_P12738265 | Cggbp1         | 0.68004  |
| A_68_P09495631 | Stard3         | 0.680216 |
| A_68_P09072145 | Aatf           | 0.680382 |
| A_68_P08369634 | Erb3           | 0.680497 |
| A_68_P05885523 | Dbx1           | 0.680708 |
| A_68_P03946036 | Ptplad2        | 0.681023 |
| A_68_P04254946 | Tmem60         | 0.681957 |
| A_68_P04697706 | Tcf1           | 0.682181 |
| A_68_P13260931 | M6prbp1        | 0.682267 |
| A_68_P12324306 | Gga1           | 0.682454 |
| A_68_P09504070 | AI842396-Kif1c | 0.682728 |
| A_68_P12047179 | Sh3bp1         | 0.683064 |
| A_68_P04899482 | Brap           | 0.683247 |
| A_68_P02653829 | BC028528       | 0.683526 |
| A_68_P14597813 | Gabre          | 0.683889 |
| A_68_P13916985 | Gm672          | 0.684167 |
| A_68_P02198060 | Ralgps1        | 0.684502 |
| A_68_P06900383 | Ogfod1         | 0.684668 |
| A_68_P14380925 | Rfk            | 0.684832 |
| A_68_P05345707 | Magi1          | 0.68532  |
| A_68_P14351720 | Pdlim1         | 0.685997 |
| A_68_P04940013 | Barhl2         | 0.686593 |
| A_68_P04199401 | Gusb           | 0.686807 |
| A_68_P09538308 | Cabp7          | 0.686993 |
| A_68_P03160430 | Mab2111        | 0.687447 |

|                |                     |          |
|----------------|---------------------|----------|
| A_68_P12329031 | Dmc1                | 0.687655 |
| A_68_P03476394 | Ssbp3               | 0.687681 |
| A_68_P13318888 | Snx9                | 0.688054 |
| A_68_P04861999 | Cabp1               | 0.688321 |
| A_68_P06873958 | Ranbp10             | 0.688609 |
| A_68_P02535516 | Neurog2             | 0.689472 |
| A_68_P13673765 | Lipg                | 0.68948  |
| A_68_P13426581 | Tnfrsf12a-Cldn6     | 0.689585 |
| A_68_P02979898 | Arhgef2             | 0.68973  |
| A_68_P04235482 | Slc30a3             | 0.689762 |
| A_68_P04899482 | Brap                | 0.68989  |
| A_68_P11138872 | Samd4               | 0.690061 |
| A_68_P06529209 | Taldo1              | 0.690247 |
| A_68_P06583791 | Pvrl2               | 0.690496 |
| A_68_P07163869 | Gab1                | 0.690632 |
| A_68_P09481065 | Prr11-1110001A07Rik | 0.690795 |
| A_68_P00473416 | Rnpepl1             | 0.690999 |
| A_68_P13415559 | Sepx1               | 0.691139 |
| A_68_P14537219 | Armex1              | 0.691315 |
| A_68_P03687831 | Ermap               | 0.691422 |
| A_68_P14414957 | Ehbp111             | 0.691724 |
| A_68_P09563953 | Limd2               | 0.692163 |
| A_68_P07634008 | Foxb1               | 0.692189 |
| A_68_P02976065 | Shox2-Rsrc1         | 0.692519 |
| A_68_P10729122 | Hiat11              | 0.692864 |
| A_68_P04436077 | Gc                  | 0.693298 |
| A_68_P07697209 | Acaa1a              | 0.69351  |
| A_68_P01927620 | Neurod1             | 0.693881 |
| A_68_P08830459 | Arid5b              | 0.694079 |
| A_68_P10504060 | Ndufs4              | 0.694205 |
| A_68_P07809714 | Rbms3               | 0.694629 |
| A_68_P04306213 | Mapre3              | 0.694629 |
| A_68_P09837413 | Sfrs5               | 0.694724 |
| A_68_P03328784 | Ube2j2              | 0.694823 |
| A_68_P09492659 | 3300001G02Rik       | 0.695006 |



|                |                   |          |
|----------------|-------------------|----------|
| A_68_P00626527 | Atf3              | 0.695009 |
| A_68_P14707230 | EG546088          | 0.695087 |
| A_68_P06121126 | Mial              | 0.695094 |
| A_68_P06698299 | Afg3l1            | 0.695367 |
| A_68_P05982377 | Cyp2r1            | 0.695895 |
| A_68_P03191519 | Mrpl47-Ndufb5     | 0.69594  |
| A_68_P09135481 | Upp1              | 0.696065 |
| A_68_P04199401 | Gusb              | 0.696109 |
| A_68_P05078226 | Mrpl53            | 0.696232 |
| A_68_P13525249 | Zfp811            | 0.696243 |
| A_68_P03938391 | Pefl              | 0.69663  |
| A_68_P07533201 | Snx22             | 0.696652 |
| A_68_P09608031 | Egfr              | 0.696691 |
| A_68_P12860637 | B830017H08Rik     | 0.696735 |
| A_68_P05833901 | Hk2               | 0.696761 |
| A_68_P07428142 | Irx3              | 0.696896 |
| A_68_P00527441 | Tagln2            | 0.697524 |
| A_68_P10313512 | Moap1             | 0.69761  |
| A_68_P02953988 | Hist2h4-Hist2h3c1 | 0.697915 |
| A_68_P03788606 | Pex14             | 0.698027 |
| A_68_P03150605 | Golph3l           | 0.698248 |
| A_68_P11018873 | Fcho2             | 0.699109 |
| A_68_P12381245 | Atf1              | 0.699572 |
| A_68_P09422847 | Atox1             | 0.69972  |
| A_68_P08249585 | Rbms2             | 0.699808 |
| A_68_P02000475 | Nkx2-2            | 0.700131 |
| A_68_P14478339 | Cyp26a1           | 0.700196 |
| A_68_P05088298 | Hipk2             | 0.700718 |
| A_68_P06219580 | Hnrpl             | 0.700966 |
| A_68_P13417509 | Angptl4           | 0.701027 |
| A_68_P00241275 | Rgs2              | 0.701132 |
| A_68_P08954659 | Kitl              | 0.701509 |
| A_68_P10732850 | Exoc3             | 0.701547 |
| A_68_P13359212 | Lrpprc            | 0.701832 |
| A_68_P08544256 | Metap2            | 0.701902 |

|                |                            |          |
|----------------|----------------------------|----------|
| A_68_P07654201 | Cd109                      | 0.701985 |
| A_68_P06204163 | ENSMUST00000083675.1:-5771 | 0.701986 |
| A_68_P14693838 | Pcylt1b                    | 0.702199 |
| A_68_P04148386 | Tmed5                      | 0.702543 |
| A_68_P09138750 | Aloxe3                     | 0.703034 |
| A_68_P03959130 | Bsdc1                      | 0.703661 |
| A_68_P12312345 | Ppplr16a                   | 0.703681 |
| A_68_P10243406 | Rps6ka5                    | 0.703686 |
| A_68_P07464718 | Pml-Stoml1                 | 0.703735 |
| A_68_P11831952 | Elp3                       | 0.703791 |
| A_68_P03556612 | Mllt3                      | 0.703988 |
| A_68_P03735990 | Tmco4                      | 0.704052 |
| A_68_P04436077 | Gc                         | 0.704142 |
| A_68_P10125273 | Prkch                      | 0.704315 |
| A_68_P01676300 | Kcna4                      | 0.704552 |
| A_68_P09483217 | Hist3h2bb                  | 0.705021 |
| A_68_P03937865 | Srrm1                      | 0.705194 |
| A_68_P10728416 | Rgs7bp                     | 0.705577 |
| A_68_P10113786 | Bcl11b                     | 0.706075 |
| A_68_P10382368 | Rtn1                       | 0.706168 |
| A_68_P13297332 | Slc37a1                    | 0.706231 |
| A_68_P05892280 | Sbk1                       | 0.706553 |
| A_68_P11834677 | Pcdh17                     | 0.706664 |
| A_68_P06666325 | Pou2f2                     | 0.70698  |
| A_68_P09306104 | Vdac1                      | 0.707094 |
| A_68_P00360280 | Avpr1b                     | 0.707122 |
| A_68_P09906828 | Zfp361l                    | 0.707259 |
| A_68_P06573422 | C230052I12Rik              | 0.707349 |
| A_68_P12157937 | Cacnb3                     | 0.707365 |
| A_68_P03619421 | Olfr1333                   | 0.707438 |
| A_68_P00844646 | Ptma                       | 0.707779 |
| A_68_P07155759 | Ctcf                       | 0.707854 |
| A_68_P08881426 | Zdhhc17                    | 0.707885 |
| A_68_P01733191 | BC061194                   | 0.708258 |
| A_68_P13260914 | M6prbp1                    | 0.708735 |

|                |                 |          |
|----------------|-----------------|----------|
| A_68_P13565030 | Stk38           | 0.709041 |
| A_68_P06938696 | Pard6a          | 0.709155 |
| A_68_P00602343 | Wdr42a          | 0.709258 |
| A_68_P11212365 | Il17rd          | 0.709292 |
| A_68_P09341747 | Senp3           | 0.709644 |
| A_68_P00526290 | Atg9a           | 0.709777 |
| A_68_P13723745 | Pcdhga5         | 0.709888 |
| A_68_P06046859 | Etv2            | 0.710364 |
| A_68_P06592637 | Cd3eap-Ppp1r13l | 0.710376 |
| A_68_P06620172 | Fus             | 0.710591 |
| A_68_P06193327 | Dmpk            | 0.710606 |
| A_68_P04460561 | Sh2b3           | 0.710722 |
| A_68_P12407265 | Tef             | 0.7109   |
| A_68_P09587090 | A830091I15Rik   | 0.711225 |
| A_68_P15054742 | Eda2r           | 0.711397 |
| A_68_P09719318 | Ccdc57          | 0.711649 |
| A_68_P06140421 | Sars2           | 0.712033 |
| A_68_P12142294 | Abcd2           | 0.712177 |
| A_68_P14961796 | Trpc5           | 0.712345 |
| A_68_P02271076 | Rapgef1         | 0.712643 |
| A_68_P08369621 | Erbp3           | 0.712969 |
| A_68_P09649890 | Eif5a           | 0.712971 |
| A_68_P04696354 | Iqce-AA881470   | 0.71299  |
| A_68_P10049453 | Id2             | 0.713081 |
| A_68_P09568808 | Sfi1-Eif4enif1  | 0.713583 |
| A_68_P13013615 | Igsf4d          | 0.713589 |
| A_68_P09208581 | Cntd1           | 0.713647 |
| A_68_P00325462 | 2810430M08Rik   | 0.713896 |
| A_68_P04097979 | Dnajc11         | 0.714675 |
| A_68_P11303277 | Spes1           | 0.715692 |
| A_68_P04874436 | Stag3           | 0.715736 |
| A_68_P08549923 | Onecut3         | 0.715888 |
| A_68_P05235141 | Rarres2         | 0.716064 |
| A_68_P09631349 | Rhbdf1-Mpg      | 0.716151 |
| A_68_P00083043 | Slc19a2         | 0.716486 |

|                |                        |          |
|----------------|------------------------|----------|
| A_68_P02653832 | BC028528-Aph1a         | 0.716491 |
| A_68_P13349715 | 1700065O13Rik          | 0.716502 |
| A_68_P01238387 | Coq4                   | 0.716863 |
| A_68_P11211281 | Pcdh17                 | 0.717418 |
| A_68_P05299879 | Hoxa3                  | 0.717437 |
| A_68_P04507294 | Slc4a2                 | 0.718484 |
| A_68_P09147607 | Map2k3                 | 0.719153 |
| A_68_P09597706 | Wipi1                  | 0.719248 |
| A_68_P10368309 | Psma3                  | 0.719357 |
| A_68_P10098010 | Atxn3                  | 0.719405 |
| A_68_P06481214 | Ap2a1                  | 0.719977 |
| A_68_P08987557 | Trp53i13-1300007F04Rik | 0.720026 |
| A_68_P04874436 | Stag3                  | 0.721061 |
| A_68_P14501274 | Syvn1                  | 0.721299 |
| A_68_P14732705 | Uxt                    | 0.721463 |
| A_68_P12111891 | Bai1                   | 0.721656 |
| A_68_P04326746 | G3bp2                  | 0.722289 |
| A_68_P12730433 | Igf2bp2                | 0.722387 |
| A_68_P03682305 | Grhpr                  | 0.722881 |
| A_68_P01478847 | Ptges2                 | 0.723062 |
| A_68_P00964479 | Fn1                    | 0.723493 |
| A_68_P12975687 | Gsk3b                  | 0.723497 |
| A_68_P08277025 | Cart1                  | 0.723565 |
| A_68_P08162873 | Atp5l                  | 0.723698 |
| A_68_P02707342 | Syt6                   | 0.723886 |
| A_68_P01807485 | Camk1d                 | 0.72416  |
| A_68_P07869537 | Cep70                  | 0.724272 |
| A_68_P04945721 | Preb                   | 0.724402 |
| A_68_P11603330 | Wbp4                   | 0.724413 |
| A_68_P05763460 | Gars                   | 0.724506 |
| A_68_P09563820 | Nudcd2                 | 0.724731 |
| A_68_P13626981 | Spry4                  | 0.724832 |
| A_68_P08946365 | Plxnc1                 | 0.724899 |
| A_68_P08082111 | Keap1                  | 0.724921 |
| A_68_P11787452 | Clybl                  | 0.725011 |

|                |                            |          |
|----------------|----------------------------|----------|
| A_68_P07561473 | 2310005P05Rik              | 0.725429 |
| A_68_P09933404 | Cdc42bpb                   | 0.725828 |
| A_68_P03418155 | Ppap2b                     | 0.72583  |
| A_68_P03573506 | Ccdc28b                    | 0.72623  |
| A_68_P00422171 | Chrnd                      | 0.726411 |
| A_68_P05108088 | Slc2a3                     | 0.726488 |
| A_68_P12149421 | 6-Mar                      | 0.727106 |
| A_68_P08660207 | Myf6                       | 0.727324 |
| A_68_P02147288 | Col5a1                     | 0.727437 |
| A_68_P01081579 | Nmnat2                     | 0.728256 |
| A_68_P04429252 | 5730509K17Rik              | 0.728622 |
| A_68_P07898845 | Myd88-Acaa1a               | 0.728653 |
| A_68_P06579870 | Mesp2                      | 0.728672 |
| A_68_P13107839 | Abcg8                      | 0.728914 |
| A_68_P07973186 | Rasgrf1                    | 0.729117 |
| A_68_P09481071 | 1110001A07Rik              | 0.729414 |
| A_68_P03814083 | Rbm35a                     | 0.729871 |
| A_68_P09277242 | Cyb561                     | 0.730123 |
| A_68_P03399684 | Arhgef10l                  | 0.730159 |
| A_68_P10492119 | Gas1                       | 0.73053  |
| A_68_P01264561 | ENSMUST00000083577.1:-3950 | 0.730798 |
| A_68_P05589325 | Asb4                       | 0.730841 |
| A_68_P11680040 | Cebpe                      | 0.731039 |
| A_68_P03133033 | Serpini1                   | 0.731075 |
| A_68_P08237687 | Tbcd15                     | 0.73133  |
| A_68_P09442531 | 3010026O09Rik              | 0.731365 |
| A_68_P04432506 | Lhx5                       | 0.731476 |
| A_68_P02649135 | Slc39a8                    | 0.731495 |
| A_68_P05843901 | Hoxa11                     | 0.731793 |
| A_68_P02138996 | Slc12a6                    | 0.731802 |
| A_68_P11613188 | Pou4f1                     | 0.731862 |
| A_68_P12371349 | A_68_P12371349             | 0.732008 |
| A_68_P09880659 | Acot1                      | 0.732066 |
| A_68_P08992028 | Pnpo                       | 0.732344 |
| A_68_P04768755 | Actb                       | 0.732382 |

|                |               |          |
|----------------|---------------|----------|
| A_68_P01761801 | Raly          | 0.73285  |
| A_68_P03206275 | Rnf20         | 0.733172 |
| A_68_P12891400 | Hunk          | 0.733639 |
| A_68_P12233048 | H1f0          | 0.733664 |
| A_68_P09550136 | Etv4          | 0.733755 |
| A_68_P02766324 | Vps45         | 0.734077 |
| A_68_P10202514 | Aldh6a1       | 0.73435  |
| A_68_P01489913 | Bmi1          | 0.734359 |
| A_68_P03043732 | Fndc3b        | 0.734785 |
| A_68_P03948130 | 2900042B11Rik | 0.73506  |
| A_68_P11911301 | Fkbp11        | 0.735179 |
| A_68_P06473598 | Dedd2-Zfp526  | 0.735537 |
| A_68_P14251712 | BC032204      | 0.735569 |
| A_68_P09289132 | Pipox         | 0.735642 |
| A_68_P14426428 | Vldlr         | 0.735792 |
| A_68_P09049858 | Wnk4          | 0.73588  |
| A_68_P08401341 | Rnf126-Fstl3  | 0.735989 |
| A_68_P08272296 | E130306M17Rik | 0.736003 |
| A_68_P05958412 | Lmo1          | 0.736244 |
| A_68_P12557377 | Chrd          | 0.736478 |
| A_68_P08109654 | Ankrd25       | 0.736486 |
| A_68_P04926196 | Fzd10         | 0.736739 |
| A_68_P09304806 | Stac2         | 0.736974 |
| A_68_P02438391 | Mrps21        | 0.73707  |
| A_68_P05383480 | Dync1i1       | 0.737648 |
| A_68_P05104710 | Wnt2          | 0.737768 |
| A_68_P03560551 | Frmd3         | 0.737819 |
| A_68_P03841228 | Zfp593        | 0.738007 |
| A_68_P13187383 | Riok2         | 0.738185 |
| A_68_P08314939 | Oaz1          | 0.738252 |
| A_68_P03776199 | Lyn           | 0.738776 |
| A_68_P07533275 | Rpsa          | 0.738983 |
| A_68_P09467840 | Sec14l2       | 0.739131 |
| A_68_P13472930 | Lama1         | 0.73922  |
| A_68_P13832401 | Pcdhgb1       | 0.739239 |

|                |               |          |
|----------------|---------------|----------|
| A_68_P09736143 | Ush1g         | 0.739376 |
| A_68_P14281775 | Emx2          | 0.739497 |
| A_68_P03676855 | Zfp189        | 0.7395   |
| A_68_P01403762 | Cat           | 0.739656 |
| A_68_P12042664 | Cdc42ep1      | 0.739659 |
| A_68_P05860624 | Bid           | 0.739662 |
| A_68_P07561953 | Aph1c         | 0.739677 |
| A_68_P04793013 | 2700038N03Rik | 0.739793 |
| A_68_P10580665 | Hist1h2bk     | 0.740135 |
| A_68_P05519173 | Mkln1         | 0.740277 |
| A_68_P05057768 | Hk2           | 0.741122 |
| A_68_P03888951 | Mllt3         | 0.741147 |
| A_68_P07231075 | Tomm20        | 0.741439 |
| A_68_P04671642 | Unc84a        | 0.741594 |
| A_68_P07748509 | Rpp25         | 0.74173  |
| A_68_P03619421 | Olfr1333      | 0.741823 |
| A_68_P04363207 | Kntc1         | 0.741833 |
| A_68_P09694614 | Lsmd1         | 0.741962 |
| A_68_P09042588 | Tcf2          | 0.742079 |
| A_68_P04629383 | Pitpnm2       | 0.742114 |
| A_68_P10022016 | Mamdc1        | 0.74217  |
| A_68_P11465793 | Tsc22d1       | 0.742228 |
| A_68_P03230060 | Frap1         | 0.742246 |
| A_68_P08698911 | Naca          | 0.742353 |
| A_68_P14407497 | Scd2          | 0.742518 |
| A_68_P14998770 | Rpl36a        | 0.742596 |
| A_68_P07561489 | 2310005P05Rik | 0.742667 |
| A_68_P13194682 | Cfb           | 0.742776 |
| A_68_P08200250 | Ipmk          | 0.742925 |
| A_68_P05599948 | C1r           | 0.74305  |
| A_68_P07353001 | Upf1          | 0.743093 |
| A_68_P07945856 | Cdv3          | 0.743102 |
| A_68_P02272810 | Plcb1         | 0.743121 |
| A_68_P09559259 | Ngfr          | 0.743245 |
| A_68_P08428861 | Stat6         | 0.743478 |

|                |                            |          |
|----------------|----------------------------|----------|
| A_68_P04534962 | Triap1                     | 0.743704 |
| A_68_P11564466 | 9430077A04Rik              | 0.743751 |
| A_68_P02033228 | A930012O16Rik              | 0.743871 |
| A_68_P10478798 | Foxf2                      | 0.743999 |
| A_68_P04691965 | Ogfod2                     | 0.744179 |
| A_68_P00844649 | Ptma                       | 0.74434  |
| A_68_P13242268 | Bat3                       | 0.744418 |
| A_68_P09080012 | Gtlf3b                     | 0.744614 |
| A_68_P08269534 | Cs                         | 0.744634 |
| A_68_P00991622 | Capn8                      | 0.744674 |
| A_68_P11400722 | Rem2                       | 0.744709 |
| A_68_P06928687 | Got2                       | 0.744755 |
| A_68_P00127657 | Wnt6                       | 0.744911 |
| A_68_P15153209 | D0HXS9928E                 | 0.745325 |
| A_68_P08237398 | Pa2g4                      | 0.745513 |
| A_68_P11886679 | Itga5                      | 0.746148 |
| A_68_P01845807 | Sephs1                     | 0.746187 |
| A_68_P00516296 | Nit1                       | 0.746433 |
| A_68_P12635594 | Ehhadh                     | 0.746435 |
| A_68_P13899746 | Epb4.114a                  | 0.746769 |
| A_68_P14757489 | Zcchc12                    | 0.747434 |
| A_68_P02294720 | Lef1                       | 0.747676 |
| A_68_P03666611 | Astn2                      | 0.747785 |
| A_68_P10743304 | Hist1h3g                   | 0.747804 |
| A_68_P13240096 | Rpl7l1                     | 0.74782  |
| A_68_P03068794 | Kcnmb2                     | 0.74788  |
| A_68_P00563810 | Mgst3                      | 0.748033 |
| A_68_P09379018 | Mnt                        | 0.748343 |
| A_68_P12019183 | Sert1                      | 0.74851  |
| A_68_P01933643 | Ggta1                      | 0.748572 |
| A_68_P00317122 | Cxcr4                      | 0.748644 |
| A_68_P05259006 | Tpi1                       | 0.748674 |
| A_68_P13230250 | Ankrd12                    | 0.748925 |
| A_68_P07872982 | ENSMUST00000034643.3:-4289 | 0.749137 |
| A_68_P01853107 | Zbtb43                     | 0.7495   |



|                |       |          |
|----------------|-------|----------|
| A_68_P02517306 | Efna4 | 0.749648 |
| A_68_P02241425 | Inoc1 | 0.749996 |

**Supplementary Table 7b: N vs A 409 hypermethylation genes on d16**

| Probe Name     | Gene Name     | Methylation difference value |
|----------------|---------------|------------------------------|
| A_68_P01442677 | Adam33        | 2.34309                      |
| A_68_P14809906 | Ldoc1         | 2.182542                     |
| A_68_P06186495 | Lrrc27        | 2.09403                      |
| A_68_P13883453 | Pcdha8        | 2.056548                     |
| A_68_P12138338 | Hoxc13        | 2.016236                     |
| A_68_P10815405 | Sfxn1         | 2.004238                     |
| A_68_P03540115 | Espn-Hes2     | 2.000182                     |
| A_68_P13883460 | Pcdha9        | 1.960946                     |
| A_68_P04945718 | Preb-Tcf23    | 1.951468                     |
| A_68_P04945718 | Preb-Tcf23    | 1.928502                     |
| A_68_P11534471 | Lgals3        | 1.909895                     |
| A_68_P14270379 | Nt5dc3        | 1.895435                     |
| A_68_P07737935 | Fxyd2         | 1.891944                     |
| A_68_P02189755 | Hrh3          | 1.887435                     |
| A_68_P00795918 | Srp9          | 1.887293                     |
| A_68_P06376689 | Npas1         | 1.885412                     |
| A_68_P02421072 | Dnajb4-Fubp1  | 1.880806                     |
| A_68_P12773755 | EG328644      | 1.874945                     |
| A_68_P04101457 | Gsh2          | 1.834503                     |
| A_68_P05495854 | Casd1         | 1.805508                     |
| A_68_P07425330 | Arrdc2        | 1.80279                      |
| A_68_P01139487 | Wnt6          | 1.790663                     |
| A_68_P01668312 | E2f1          | 1.787956                     |
| A_68_P09804391 | Siva1         | 1.787582                     |
| A_68_P12268481 | Aqp2          | 1.771162                     |
| A_68_P01717991 | Btbd14a       | 1.769291                     |
| A_68_P09165274 | Nxn-Timm22    | 1.745295                     |
| A_68_P04346888 | Ppp2r2c       | 1.741594                     |
| A_68_P03400995 | Txn1          | 1.734468                     |
| A_68_P09177324 | Olf30         | 1.732713                     |
| A_68_P03974013 | Gja4          | 1.729471                     |
| A_68_P01498685 | A430105I19Rik | 1.724954                     |
| A_68_P02564830 | Igsf3         | 1.724518                     |

|                |               |          |
|----------------|---------------|----------|
| A_68_P10614127 | Ror2          | 1.722767 |
| A_68_P12751159 | B830017H08Rik | 1.70917  |
| A_68_P03228980 | Acot7         | 1.707831 |
| A_68_P08143591 | Pdcd6ip       | 1.700578 |
| A_68_P06208098 | Hras1         | 1.698275 |
| A_68_P13127671 | Sox8          | 1.697824 |
| A_68_P09018398 | Gprc5c        | 1.682796 |
| A_68_P03301110 | Galnt12       | 1.678821 |
| A_68_P12097344 | Krt73         | 1.673928 |
| A_68_P13365866 | Ihpk3         | 1.670431 |
| A_68_P05370614 | Lrrc23        | 1.668623 |
| A_68_P12068740 | Pp11r         | 1.6674   |
| A_68_P05278653 | Capza2        | 1.660087 |
| A_68_P08799615 | Cdc216        | 1.656491 |
| A_68_P13291042 | Fkbp1         | 1.655958 |
| A_68_P08137775 | Trim29        | 1.644358 |
| A_68_P13191224 | Sema6b        | 1.642482 |
| A_68_P07663357 | Megf11        | 1.638227 |
| A_68_P10027436 | Rgs6          | 1.635025 |
| A_68_P06318305 | Igf1r         | 1.633508 |
| A_68_P02779323 | Trim45        | 1.626551 |
| A_68_P08717087 | Tcba1         | 1.625998 |
| A_68_P04964439 | Tmem132d      | 1.624712 |
| A_68_P01383195 | B230120H23Rik | 1.617043 |
| A_68_P14275989 | Tbcd12        | 1.61573  |
| A_68_P09922529 | Ptpn2         | 1.612314 |
| A_68_P11941919 | EG432987      | 1.612227 |
| A_68_P09483960 | Cxcl16        | 1.611037 |
| A_68_P05970860 | Phox2a        | 1.607537 |
| A_68_P06152331 | Bcl3          | 1.599857 |
| A_68_P02483040 | Ppa2          | 1.589217 |
| A_68_P06926631 | A230052G05Rik | 1.587101 |
| A_68_P00505719 | 3322402L07Rik | 1.584498 |
| A_68_P06565632 | Lrrc27        | 1.584281 |
| A_68_P05033637 | Ltbr          | 1.583232 |

|                |               |          |
|----------------|---------------|----------|
| A_68_P04646216 | BC004044      | 1.579388 |
| A_68_P12117966 | LOC554292     | 1.575279 |
| A_68_P06983908 | 5033428A16Rik | 1.570745 |
| A_68_P13365875 | Ihpk3         | 1.564213 |
| A_68_P09949390 | Btbd7         | 1.558795 |
| A_68_P11215454 | Olfm4         | 1.557819 |
| A_68_P07897281 | Rdx           | 1.554041 |
| A_68_P03405759 | Txlna         | 1.553528 |
| A_68_P09513483 | Vmo1          | 1.552141 |
| A_68_P03400995 | Txn1          | 1.549803 |
| A_68_P03300156 | Anp32b        | 1.549295 |
| A_68_P12240046 | Eppk1         | 1.544518 |
| A_68_P06664663 | Tex101        | 1.542541 |
| A_68_P08660202 | Myf6          | 1.540616 |
| A_68_P08449896 | Foxo3a        | 1.538192 |
| A_68_P09309985 | Krt35         | 1.534781 |
| A_68_P10614129 | Ror2          | 1.532037 |
| A_68_P13176689 | Cul7          | 1.53041  |
| A_68_P00119253 | B4galt3       | 1.52864  |
| A_68_P01159756 | Hrh3          | 1.528635 |
| A_68_P13075872 | Mas1-Mrgprh   | 1.528059 |
| A_68_P11680943 | Entpd4        | 1.525934 |
| A_68_P00331311 | EG240916      | 1.525499 |
| A_68_P13496188 | Traf7         | 1.52355  |
| A_68_P11932638 | Cacnb3        | 1.522527 |
| A_68_P10512750 | Thbs4         | 1.521117 |
| A_68_P11855904 | Ly6d          | 1.515977 |
| A_68_P03819458 | Rbp7          | 1.515733 |
| A_68_P14243676 | 1700019N19Rik | 1.515392 |
| A_68_P11650775 | Pnoc          | 1.514185 |
| A_68_P11253316 | Slc22a17      | 1.513158 |
| A_68_P09017696 | Krt42         | 1.510214 |
| A_68_P11899315 | BC024139      | 1.509074 |
| A_68_P12129679 | Csad          | 1.50561  |
| A_68_P13927246 | Pcdhac2       | 1.504887 |

|                |                    |          |
|----------------|--------------------|----------|
| A_68_P14346771 | Ms4a7              | 1.504333 |
| A_68_P12129693 | Csad               | 1.503652 |
| A_68_P06871160 | Bst2-1110012M11Rik | 1.500908 |
| A_68_P12093074 | Arhgap8            | 1.500185 |
| A_68_P05596978 | Rnf103             | 1.49965  |
| A_68_P03625246 | Zswim5             | 1.49615  |
| A_68_P07871025 | Htr1b              | 1.496005 |
| A_68_P03300156 | Anp32b             | 1.495502 |
| A_68_P05904416 | Klk15              | 1.495005 |
| A_68_P07129218 | Pkd1l2-Bcmo1       | 1.494286 |
| A_68_P03555189 | Bai2               | 1.49364  |
| A_68_P08045042 | Cacna2d2           | 1.493452 |
| A_68_P11281788 | 2600011E07Rik      | 1.491899 |
| A_68_P06631626 | Wtip               | 1.491517 |
| A_68_P04646216 | BC004044           | 1.491433 |
| A_68_P08675788 | Slc17a8            | 1.490621 |
| A_68_P03974014 | Gja4               | 1.489772 |
| A_68_P08980029 | Krt27              | 1.487658 |
| A_68_P12092825 | Sstr3              | 1.486341 |
| A_68_P06387117 | Hdgfrp3            | 1.485299 |
| A_68_P01757681 | Creb3l1            | 1.481582 |
| A_68_P01334676 | 9230107O10Rik      | 1.476058 |
| A_68_P04331232 | Dtx1               | 1.476011 |
| A_68_P03370361 | Cer1               | 1.474334 |
| A_68_P01979586 | Mmp24              | 1.473049 |
| A_68_P04318728 | Pebp1              | 1.472847 |
| A_68_P01295326 | Lamc3              | 1.471722 |
| A_68_P04308903 | Areg               | 1.470039 |
| A_68_P10356757 | Trim9              | 1.46986  |
| A_68_P01619771 | Insm1              | 1.462248 |
| A_68_P09583142 | P2rx1              | 1.461627 |
| A_68_P07024704 | 1700029J07Rik      | 1.459602 |
| A_68_P07559432 | D930028F11Rik      | 1.459294 |
| A_68_P07453357 | Cd109              | 1.457014 |
| A_68_P05893671 | 6330512M04Rik      | 1.45689  |

|                |               |          |
|----------------|---------------|----------|
| A_68_P13977860 | Pcdhga5       | 1.456032 |
| A_68_P01531594 | Mdk           | 1.455592 |
| A_68_P03361261 | Ubx3          | 1.454801 |
| A_68_P05590714 | Ret           | 1.453914 |
| A_68_P14323852 | Psd           | 1.451816 |
| A_68_P07400685 | Vac14         | 1.451249 |
| A_68_P10324890 | Dio3          | 1.451129 |
| A_68_P06751294 | Slc12a3       | 1.45073  |
| A_68_P10739130 | Hrh2          | 1.45014  |
| A_68_P01887581 | Shc4          | 1.447136 |
| A_68_P11650789 | Pnoc          | 1.445781 |
| A_68_P07423734 | Slc7a5        | 1.444347 |
| A_68_P04873423 | Kcnh2         | 1.44317  |
| A_68_P05804599 | Mrpl19        | 1.441819 |
| A_68_P11971534 | Kcns2         | 1.439005 |
| A_68_P10573446 | Larp5         | 1.435129 |
| A_68_P09156504 | Mfap4         | 1.434511 |
| A_68_P13293615 | Gbl           | 1.433212 |
| A_68_P12461149 | Krt2-25       | 1.433036 |
| A_68_P12233648 | Osmr          | 1.432645 |
| A_68_P03075997 | Dcamk12       | 1.432491 |
| A_68_P12323106 | Jrk           | 1.431737 |
| A_68_P13553860 | BC031441-Ebi3 | 1.431056 |
| A_68_P01654378 | Cst11         | 1.431036 |
| A_68_P10096901 | Bdkrb1        | 1.428969 |
| A_68_P00789268 | Myog          | 1.428938 |
| A_68_P06096064 | Adam12        | 1.427533 |
| A_68_P05936205 | Ifitm5        | 1.426306 |
| A_68_P04854579 | Hspb8         | 1.425306 |
| A_68_P05372329 | 8430419L09Rik | 1.425188 |
| A_68_P04799896 | Trim56        | 1.424642 |
| A_68_P07453364 | Cd109         | 1.42401  |
| A_68_P14156202 | Pdcd4         | 1.423262 |
| A_68_P04506925 | Gpr81         | 1.422663 |
| A_68_P12438489 | Sfrs2ip       | 1.422363 |

|                |               |          |
|----------------|---------------|----------|
| A_68_P12224465 | Fbln1         | 1.421897 |
| A_68_P06422662 | Dmkn          | 1.421556 |
| A_68_P05596974 | Rnf103        | 1.421527 |
| A_68_P00556266 | Ctdsp1        | 1.420307 |
| A_68_P03970943 | Espn          | 1.420068 |
| A_68_P09611938 | Havcr2        | 1.418968 |
| A_68_P10151513 | Psma6         | 1.41846  |
| A_68_P04799035 | Nsg1          | 1.418253 |
| A_68_P13103833 | Smoc2         | 1.418214 |
| A_68_P13166506 | Ddah2         | 1.418187 |
| A_68_P02009521 | 1190002A17Rik | 1.417585 |
| A_68_P03709353 | Plcl4         | 1.417371 |
| A_68_P03899301 | Zbtb8         | 1.417202 |
| A_68_P12362731 | Mfsd3         | 1.416568 |
| A_68_P11906547 | Bai1          | 1.416568 |
| A_68_P13385328 | 4930546H06Rik | 1.416153 |
| A_68_P12406891 | Aqp6          | 1.415879 |
| A_68_P03568532 | Tspan1        | 1.415876 |
| A_68_P08210289 | 9-Mar         | 1.415831 |
| A_68_P00451766 | Nmnat2        | 1.415778 |
| A_68_P09631017 | Csf2          | 1.414005 |
| A_68_P07173287 | EG13909       | 1.413959 |
| A_68_P04425904 | Wasf3         | 1.413345 |
| A_68_P13190929 | Zbtb9         | 1.413282 |
| A_68_P11308601 | Tgm1          | 1.412908 |
| A_68_P12215401 | Sstr3         | 1.412418 |
| A_68_P07215117 | Sfrp1         | 1.412338 |
| A_68_P00528102 | A130010J15Rik | 1.412154 |
| A_68_P03553498 | Espn          | 1.41195  |
| A_68_P12462764 | Top1mt        | 1.411599 |
| A_68_P02716554 | Adh1          | 1.411018 |
| A_68_P11658283 | Kcnk5         | 1.41094  |
| A_68_P07822241 | Nr2e3         | 1.410808 |
| A_68_P12323097 | Jrk           | 1.410734 |
| A_68_P09677979 | Krt35         | 1.409825 |

|                |               |          |
|----------------|---------------|----------|
| A_68_P07565599 | Gnb5          | 1.408292 |
| A_68_P04316294 | Mapre3        | 1.407638 |
| A_68_P06633818 | Gm1082        | 1.405985 |
| A_68_P00993107 | Lemd1         | 1.405865 |
| A_68_P03413661 | Padi4         | 1.404845 |
| A_68_P13166533 | Ddah2         | 1.404057 |
| A_68_P06728122 | Enpp6         | 1.403461 |
| A_68_P12460882 | Yaf2          | 1.402574 |
| A_68_P14131435 | Cdx1-Pdgfrb   | 1.402354 |
| A_68_P02865901 | Mef2d         | 1.402333 |
| A_68_P05226947 | Abcc9         | 1.401101 |
| A_68_P03912407 | Aqp7          | 1.400689 |
| A_68_P06053429 | Tssc4         | 1.400163 |
| A_68_P06408617 | Lsp1          | 1.400086 |
| A_68_P06549860 | 2310033E01Rik | 1.399809 |
| A_68_P14605117 | 1700045I19Rik | 1.399771 |
| A_68_P00363449 | Teddm1        | 1.399699 |
| A_68_P12341775 | Plec1         | 1.399275 |
| A_68_P03854965 | Marcksl1      | 1.398753 |
| A_68_P12111323 | Plec1         | 1.398476 |
| A_68_P05938143 | Klk15         | 1.398238 |
| A_68_P07195280 | Comp          | 1.397532 |
| A_68_P08963632 | Slc5a4a       | 1.397503 |
| A_68_P09107785 | Tcap          | 1.397479 |
| A_68_P14261086 | Syt7          | 1.39648  |
| A_68_P09620647 | Dcxr          | 1.395695 |
| A_68_P00169777 | Ikbke         | 1.395683 |
| A_68_P09444804 | Pyy           | 1.395386 |
| A_68_P07319284 | Rrad          | 1.39505  |
| A_68_P05958473 | Tmem16e       | 1.394619 |
| A_68_P03457502 | Zmynd12       | 1.394521 |
| A_68_P02023974 | 1110061N23Rik | 1.394486 |
| A_68_P09459558 | Tcf7          | 1.393455 |
| A_68_P03226841 | Pla2g2c       | 1.392659 |
| A_68_P12298037 | Lynx1         | 1.392549 |



|                |                           |          |
|----------------|---------------------------|----------|
| A_68_P03448458 | Sesn2                     | 1.392427 |
| A_68_P07820591 | Pcbp4                     | 1.39238  |
| A_68_P02501124 | Nexn                      | 1.391383 |
| A_68_P03720734 | Mmel1                     | 1.391196 |
| A_68_P09483427 | Sfrs2-2600014M03Rik       | 1.390894 |
| A_68_P00444553 | Darc                      | 1.390467 |
| A_68_P03909943 | Arid1a                    | 1.389192 |
| A_68_P05972322 | Xylt1                     | 1.388761 |
| A_68_P05244159 | ENSMUST00000083652.1:2772 | 1.388054 |
| A_68_P04528236 | Trim50                    | 1.387044 |
| A_68_P01512424 | Nr5a1                     | 1.386465 |
| A_68_P06129246 | Ptgir                     | 1.386124 |
| A_68_P00052299 | Gpc1                      | 1.385347 |
| A_68_P12273277 | Acvrl1                    | 1.384572 |
| A_68_P06544745 | Rpl13a                    | 1.384276 |
| A_68_P05208549 | Dync1i1                   | 1.383989 |
| A_68_P09006081 | Hoxb4                     | 1.383845 |
| A_68_P04543788 | Epo                       | 1.383701 |
| A_68_P13658376 | LOC639653                 | 1.382952 |
| A_68_P11939489 | Zfp251                    | 1.382311 |
| A_68_P13396934 | Pspn                      | 1.382199 |
| A_68_P01606835 | Prnd                      | 1.382113 |
| A_68_P06620448 | 5430432N15Rik             | 1.381823 |
| A_68_P09624543 | Krt19                     | 1.381113 |
| A_68_P07317287 | Aktip                     | 1.380563 |
| A_68_P03287181 | C1qdc2                    | 1.380508 |
| A_68_P08800400 | Polr3b                    | 1.380063 |
| A_68_P01655397 | BC050777                  | 1.379852 |
| A_68_P02071364 | Wisp2                     | 1.379713 |
| A_68_P13697471 | Pcdha5                    | 1.379344 |
| A_68_P13456368 | H2-M10.1                  | 1.379336 |
| A_68_P02989352 | Dcamk12                   | 1.379329 |
| A_68_P01781180 | Bcas1                     | 1.378844 |
| A_68_P12298006 | Lynx1                     | 1.377705 |
| A_68_P05879159 | Suclg1                    | 1.377306 |

|                |                            |          |
|----------------|----------------------------|----------|
| A_68_P03413661 | Padi4                      | 1.376063 |
| A_68_P04324543 | Nat8l                      | 1.376043 |
| A_68_P07349274 | Rbm13                      | 1.375987 |
| A_68_P09309975 | Krt35                      | 1.375793 |
| A_68_P07506801 | Cck                        | 1.375411 |
| A_68_P03448375 | Tnfsf8                     | 1.37474  |
| A_68_P13467225 | Arhgap28                   | 1.374529 |
| A_68_P04873423 | Kcnh2                      | 1.374163 |
| A_68_P04222183 | Smarcd3                    | 1.373947 |
| A_68_P05772946 | Il17ra                     | 1.373931 |
| A_68_P07615452 | Mst1r                      | 1.373718 |
| A_68_P04502132 | Cldn13                     | 1.372323 |
| A_68_P09926896 | 2810002I04Rik              | 1.372186 |
| A_68_P06865553 | Chrn3                      | 1.371884 |
| A_68_P10096903 | Bdkrb1                     | 1.370888 |
| A_68_P04966920 | Rpl21                      | 1.37029  |
| A_68_P03974035 | Gja4                       | 1.369796 |
| A_68_P12092110 | Krt79                      | 1.36939  |
| A_68_P11438500 | D14Ert449e-C330003B14Rik   | 1.368955 |
| A_68_P09536877 | Pnmt                       | 1.368951 |
| A_68_P07349292 | BC025816                   | 1.368751 |
| A_68_P13058565 | Slc22a2                    | 1.368585 |
| A_68_P13196755 | Grm4                       | 1.368241 |
| A_68_P11528226 | BC055107                   | 1.367413 |
| A_68_P03909943 | Arid1a                     | 1.366859 |
| A_68_P09168909 | Ngfr                       | 1.366606 |
| A_68_P13568346 | Ly6g6c                     | 1.366322 |
| A_68_P01275517 | Urm1                       | 1.366155 |
| A_68_P05617222 | Fxyd4                      | 1.365609 |
| A_68_P07682087 | ENSMUST00000083662.1:-4036 | 1.365597 |
| A_68_P09448685 | 2210403B10Rik              | 1.364972 |
| A_68_P11230853 | Jub                        | 1.364946 |
| A_68_P10355900 | Ckb-6720458F09Rik          | 1.363708 |
| A_68_P03899398 | N28178                     | 1.363475 |
| A_68_P12441858 | Adamts20                   | 1.363237 |

|                |                            |          |
|----------------|----------------------------|----------|
| A_68_P00661821 | Cnm4                       | 1.362611 |
| A_68_P01782935 | Ggtl3                      | 1.362086 |
| A_68_P12193009 | Krt79                      | 1.361886 |
| A_68_P11042513 | 4930544M13Rik              | 1.360955 |
| A_68_P04966043 | 0610009O03Rik              | 1.359467 |
| A_68_P03964165 | Gnl2                       | 1.358997 |
| A_68_P04326186 | Sh3tc1                     | 1.358857 |
| A_68_P09218102 | Dock2                      | 1.358572 |
| A_68_P01875370 | Kcnb1                      | 1.35788  |
| A_68_P04346888 | Ppp2r2c                    | 1.357859 |
| A_68_P09658179 | Bahcc1                     | 1.357685 |
| A_68_P15185453 | Tmem47                     | 1.357529 |
| A_68_P02034225 | Itga6                      | 1.357451 |
| A_68_P01772352 | Lcn12                      | 1.356836 |
| A_68_P12437042 | Mapk15                     | 1.356723 |
| A_68_P07682089 | ENSMUST00000083662.1:-4369 | 1.356568 |
| A_68_P07334122 | Exoc3l-E2f4                | 1.356412 |
| A_68_P09611503 | Doc2b                      | 1.356372 |
| A_68_P05952684 | Bnc1                       | 1.356203 |
| A_68_P08138672 | AI593442                   | 1.356081 |
| A_68_P07422544 | Cpne7                      | 1.355603 |
| A_68_P05531486 | Gdf3                       | 1.355337 |
| A_68_P02238998 | Osbpl2                     | 1.354655 |
| A_68_P14339787 | Adra2a                     | 1.354605 |
| A_68_P07950325 | Sh3px3                     | 1.354485 |
| A_68_P05585260 | Hrh1                       | 1.354414 |
| A_68_P08514482 | Tac2                       | 1.353772 |
| A_68_P08782402 | Jsrp1                      | 1.353675 |
| A_68_P09240367 | Tbkbp1                     | 1.352878 |
| A_68_P09105482 | Kcnip1                     | 1.352624 |
| A_68_P13449298 | Scube3                     | 1.35262  |
| A_68_P07506791 | Cck                        | 1.35248  |
| A_68_P07411349 | Rab3a                      | 1.352312 |
| A_68_P11920360 | Krt75                      | 1.352057 |
| A_68_P13429542 | Pbx2                       | 1.352009 |

|                |                    |          |
|----------------|--------------------|----------|
| A_68_P01092822 | Fmo1               | 1.35155  |
| A_68_P01220646 | 4833422F24Rik      | 1.350428 |
| A_68_P01910329 | Grb14              | 1.35011  |
| A_68_P10014745 | Pnma1              | 1.349738 |
| A_68_P06641066 | Rpl18              | 1.349681 |
| A_68_P09263154 | Mmp28-Taf15        | 1.349494 |
| A_68_P13271868 | Gtf2h4             | 1.349317 |
| A_68_P04114789 | Add1               | 1.348994 |
| A_68_P09485551 | Mafg               | 1.348189 |
| A_68_P02026624 | Tmem62             | 1.347905 |
| A_68_P03135772 | Mab2112            | 1.347672 |
| A_68_P05915391 | 1700008P20Rik      | 1.347339 |
| A_68_P00634491 | Tmem58             | 1.347231 |
| A_68_P11567764 | 4930578I06Rik      | 1.34677  |
| A_68_P07351402 | Rab20              | 1.346479 |
| A_68_P04355011 | P2rx2              | 1.346273 |
| A_68_P01267327 | Trim44             | 1.346088 |
| A_68_P04163384 | Steap1             | 1.345586 |
| A_68_P08300127 | Olfir796           | 1.34554  |
| A_68_P03502654 | Aldh1b1            | 1.344962 |
| A_68_P09645952 | OTTMUSG00000000934 | 1.344829 |
| A_68_P02752639 | Hist2h2be          | 1.344661 |
| A_68_P07530192 | Col7a1             | 1.344185 |
| A_68_P01249319 | Sephs1             | 1.34342  |
| A_68_P04808471 | Ephb4              | 1.343316 |
| A_68_P12074308 | Galr3              | 1.343114 |
| A_68_P09545756 | Zfp454             | 1.343003 |
| A_68_P13405326 | Srbd1              | 1.342727 |
| A_68_P06924600 | BC051227           | 1.342376 |
| A_68_P05547809 | Lrrc23             | 1.342008 |
| A_68_P03568532 | Tspan1             | 1.341324 |
| A_68_P10354469 | Jag2               | 1.340861 |
| A_68_P10060189 | 1200009I06Rik      | 1.340258 |
| A_68_P12457546 | 2310016F22Rik      | 1.340194 |
| A_68_P08979894 | Krt42              | 1.339262 |

|                |                          |          |
|----------------|--------------------------|----------|
| A_68_P07470088 | Cdkn2d                   | 1.339244 |
| A_68_P08514391 | Gng7                     | 1.339227 |
| A_68_P09072868 | Pitpnm3                  | 1.338663 |
| A_68_P13150762 | Clic1                    | 1.338163 |
| A_68_P09124054 | Gfap                     | 1.338131 |
| A_68_P08888274 | Cd63                     | 1.338058 |
| A_68_P05299461 | Cpa1                     | 1.337323 |
| A_68_P01469129 | Rem1                     | 1.337275 |
| A_68_P07847706 | Gpr83                    | 1.33646  |
| A_68_P12177088 | Ly6k                     | 1.336186 |
| A_68_P03679600 | Tas1r2                   | 1.336058 |
| A_68_P03670798 | Masp2                    | 1.335352 |
| A_68_P07005244 | Best2                    | 1.334757 |
| A_68_P09042040 | ENSMUST00000021240.4:169 | 1.334682 |
| A_68_P07089318 | Foxl1                    | 1.33413  |
| A_68_P13450793 | Zbtb22                   | 1.334052 |
| A_68_P03495256 | Ephb2                    | 1.334023 |
| A_68_P00815120 | Wdr26                    | 1.333762 |
| A_68_P09104090 | C1qtnf1                  | 1.333483 |
| A_68_P10126148 | Lamb1-1                  | 1.332216 |
| A_68_P12423107 | Adm2                     | 1.331559 |
| A_68_P07166167 | Ndrg4                    | 1.331269 |
| A_68_P03153566 | Mcl1                     | 1.33114  |
| A_68_P01498090 | Plcg1                    | 1.330655 |
| A_68_P12476467 | Pigp                     | 1.330322 |
| A_68_P04528236 | Trim50                   | 1.330284 |
